# Supplementary material
Source: publisher figshare collection journal article supplement (https://acs.figshare.com/ndownloader/files/3869761)

# **Molecular recognition of Brucella A and M antigens dissected by synthetic oligosaccharide glycoconjugates leads to a disaccharide diagnostic for brucellosis**

N. Vijaya Ganesh<sup>1</sup>, Joanna M. Sadowska<sup>1</sup>, Susmita Sarkar<sup>1</sup>, Laurence Howells<sup>2</sup>, John McGiven<sup>2</sup> and David R. Bundle\*<sup>1</sup>

<sup>1</sup> Department of Chemistry, University of Alberta, Edmonton, Alberta T6G 2G2, Canada

<sup>2</sup>FAO/WHO Collaborating Centre for Brucellosis, OIE Brucellosis Reference Centre, Department of Bacteriology, Animal Health and Veterinary Laboratories Agency, Woodham Lane, Addlestone, Surrey, United Kingdom, KT15 3NB.

*Email: [dave.bundle@ualberta.ca](mailto:dave.bundle@ualberta.ca)*

## **SUPPORTING INFORMATION**

|                                                          |            |
|----------------------------------------------------------|------------|
| <b>I. GENERAL INFORMATION</b>                            | <b>S2</b>  |
| <b>II. SYNTHESIS OF RHAMNOSIDE BUILDING BLOCK</b>        | <b>S3</b>  |
| <b>III. SYNTHESIS OF GLYCOSYL DONORS</b>                 | <b>S3</b>  |
| <b>IV. SYNTHESIS OF OLIGOSACCHARIDES 1-6</b>             | <b>S15</b> |
| <b>V. PREPARATION OF GLYCOCONJUGATES</b>                 | <b>S45</b> |
| <b>VI. ELISA DATA</b>                                    | <b>S58</b> |
| <b>VI. REFERENCES</b>                                    | <b>S62</b> |
| <b>VII. <sup>1</sup>H AND <sup>13</sup>C NMR SPECTRA</b> | <b>S63</b> |

## **I. GENERAL INFORMATION**

### **Materials and Methods**

Analytical TLC was performed on Silica Gel 60-F254 (Merck, Darmstadt) with detection by quenching of fluorescence and/or by charring with 10% sulfuric acid in ethanol. All commercial reagents were used as supplied. Column chromatography was performed on Silica Gel 230-400 mesh, 60 Å (Silicycle, Ontario) with HPLC quality solvents. Bovine Serum Albumin (purchased from Sigma Aldrich) and Tetanus toxoid (purchased from STATENS SERUM INSTITUT, Denmark) was used. Molecular sieves (3 Å or 4 Å), were crushed and stored in an oven at 150 °C after activation at 500 °C for 48 h and dried under vacuum before use. Organic solutions were dried with anhydrous MgSO<sub>4</sub> prior to concentration under vacuum at <40 °C (bath). All final compounds were purified by reverse phase chromatography performed on a Waters 600 HPLC system, using a Beckmann semi-preparative C-18 column (10 x 250 mm, 5 µ) with a combination of acetonitrile and water as eluents. Products were detected with a Waters 2487 UV detector. Optical rotations were measured with a Perkin-Elmer 241 polarimeter for samples in a 10 cm cell at 22 ± 2 °C.  $[\alpha]_D$  values are given in units of 10<sup>-1</sup> deg cm<sup>2</sup> g<sup>-1</sup>. <sup>1</sup>H NMR spectra were recorded on 500, 600 or 700 MHz spectrometers. First order proton chemical shifts  $\delta_H$  are referenced to either residual CHCl<sub>3</sub> ( $\delta_H$  7.26, CDCl<sub>3</sub>) or CD<sub>2</sub>HOD ( $\delta_H$  3.30, CD<sub>3</sub>OD), or external acetone ( $\delta_H$  2.225, D<sub>2</sub>O). The assignment of resonances for all compounds was made by two-dimensional homonuclear and for a limited subset also by heteronuclear chemical shift correlation experiments. Specifically for mono- to trisaccharides: peak assignments were based on 2D-<sup>1</sup>H-<sup>1</sup>H-gCOSY experiments. Peak assignments for tetra- to hexasaccharides were based on 2D-<sup>1</sup>H-<sup>1</sup>H-gCOSY, selective 1D-<sup>1</sup>H-CSSF-TOCSY (Chemical Shift Selective Filter - TOCSY) experiments and selective 1D-ROESY experiments. Mass analysis was performed by positive-mode electrospray ionization on a hybrid sector-TOF mass spectrometer and for protein glycoconjugates by MALDI mass analysis, employing sinapinic acid as matrix.

The numbering used for resonance assignments was as follows:

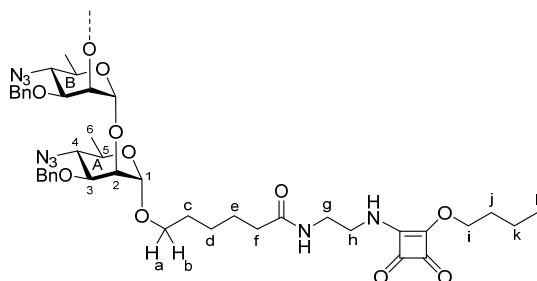

## II. SYNTHESIS OF RHAMNOSIDE BUILDING BLOCK

### Synthesis of Methyl 4-azido-4,6-dideoxy- $\alpha$ -D-mannopyranoside (S8)

The key precursor **S8** was prepared according to scheme 1S and analytical data for the title compound was essentially the same as previously described.<sup>1</sup>

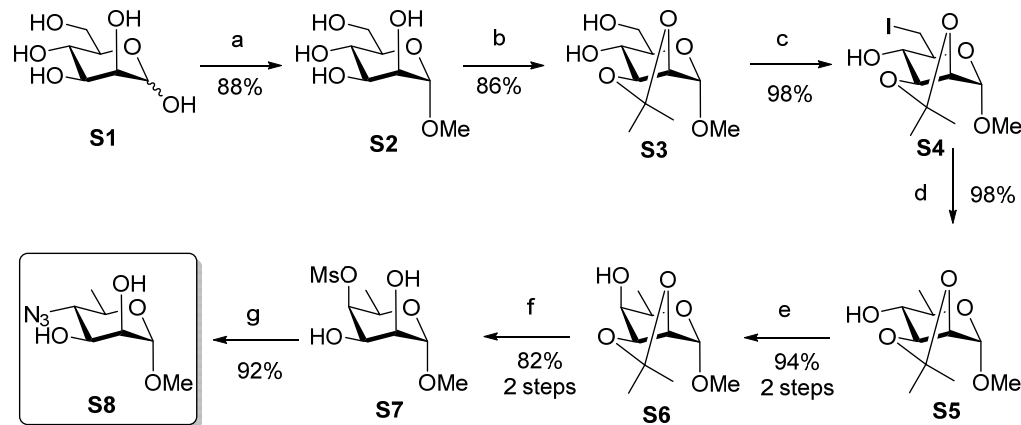

**Scheme 1S.** Conditions: a) AcCl, MeOH, 70 °C, 6h; b) DMP, PTSA, rt, H<sub>2</sub>O, 4h; c) PPh<sub>3</sub>, Imid, I<sub>2</sub>, PhMe, 10 min; d) Pd/C, H<sub>2</sub>, rt, EtOH/Et<sub>3</sub>N, 16h; e) i) OxCl, DMSO, DIPEA, CH<sub>2</sub>Cl<sub>2</sub>, -78 °C-rt, 16h; ii) NaBH<sub>4</sub>, EtOH, rt, 2h; f) i) MsCl, Py, 0 °C-rt, 2h; ii) TFA/H<sub>2</sub>O (9:1), CH<sub>2</sub>Cl<sub>2</sub>, rt, 10 min. g) NaN<sub>3</sub>, 15-crown-5, DMF, 100 °C, 6h.

## III. SYNTHESIS OF GLYCOSYL DONORS

### A. Synthesis of trichloroacetimidate glycosyl donor 7

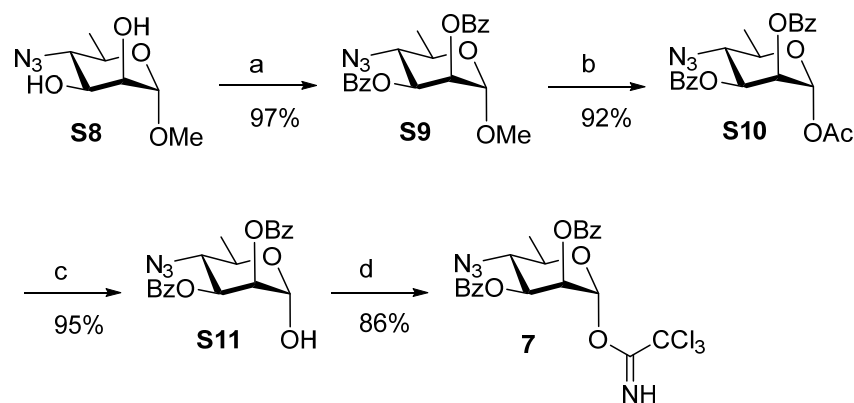

**Scheme 2S:** Conditions: a) BzCl, Py, rt, 10 h; b) Ac<sub>2</sub>O, AcOH, H<sub>2</sub>SO<sub>4</sub>, rt, 6 h; c) NH<sub>2</sub>NH<sub>2</sub>.AcOH, DMF, 60 °C, 0.5 h; d) CCl<sub>3</sub>CN, DBU, CH<sub>2</sub>Cl<sub>2</sub>, rt, 10 min.

**Methyl 4-azido-2,3-di-*O*-benzoyl-4,6-dideoxy- $\alpha$ -D-mannopyranoside (**S9**)<sup>2</sup>.**

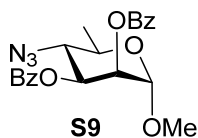

Benzoyl chloride (2.0 mL, 17.2 mmol) was added dropwise to a stirred solution of Methyl 4-azido-4,6-dideoxy- $\alpha$ -D-mannopyranoside **S8** (1.59 g, 7.82 mmol) in pyridine (5 mL) containing DMAP (0.191 g, 1.56 mmol) at 0 °C. The resulting mixture was stirred under argon for 10 h at 21 °C. After that, CH<sub>3</sub>OH (2 mL) was added to the reaction mixture, stirred for 10 min, then diluted with CH<sub>2</sub>Cl<sub>2</sub> (~100 mL) and washed with aq. HCl (1M, 2 x 50 mL), water (100 mL), sat.aq. NaHCO<sub>3</sub> (50 mL), and brine (30 mL). The organic phase was separated, dried over MgSO<sub>4</sub>, and concentrated *in vacuo*. The residue was purified by column chromatography on silica gel (ethyl acetate – hexane gradient elution) to afford the title compound (3.12 g, 97%) as a white foam. Analytical data for **S9**: R<sub>f</sub> = 0.40 (ethyl acetate/hexane, 1/9, v/v); [ $\alpha$ ]<sub>D</sub><sup>21</sup> = -130.8 (c = 1.1, CHCl<sub>3</sub>); <sup>1</sup>H NMR (600 MHz, CDCl<sub>3</sub>):  $\delta$  8.21-7.31 (m, 10H, H-Ar), 5.60 (dd, 1H, *J*<sub>2,3</sub> = 1.8 Hz, H-2), 5.59 (dd, 1H, *J*<sub>3,4</sub> = 3.6 Hz, H-3), 4.85 (d, 1H, *J*<sub>1,2</sub> = 1.2 Hz, H-1), 3.83 (dq, 1H, *J*<sub>4,5</sub> = 10.2 Hz, *J*<sub>5,6</sub> = 6.0 Hz, H-5), 3.76 (dd, 1H, *J*<sub>4,5</sub> = 10.2 Hz, H-4), 3.45 (s, 3H, -OCH<sub>3</sub>), 1.48 ppm (d, 3H, *J*<sub>5,6</sub> = 6.0 Hz, H-6); <sup>13</sup>C NMR (126 MHz, CDCl<sub>3</sub>):  $\delta$  165.4, 165.3, 133.8, 133.5, 133.3, 130.2, 129.8, 129.8, 129.5, 129.3, 128.6, 128.5, 128.4, 98.6, 71.1, 69.8, 66.9, 63.5, 55.4, 18.6 ppm; HRMS (ESI): *m/z* calcd for C<sub>21</sub>H<sub>21</sub>N<sub>3</sub>O<sub>6</sub>Na [M+Na]<sup>+</sup>: 434.1323, found: 434.1317.

**1-*O*-Acetyl-4-azido-2,3-di-*O*-benzoyl-4,6-dideoxy- $\alpha$ -D-mannopyranose (**S10**).**

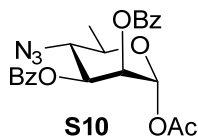

A solution of **S9** (3.10 g, 7.54 mmol) in acetic anhydride/acetic acid/sulfuric acid (50:20:0.5, 70 mL) was stirred at 21 °C for 6 h, and then poured into ice-cold 1M K<sub>2</sub>CO<sub>3</sub> solution (100 mL). The mixture was then diluted with CH<sub>2</sub>Cl<sub>2</sub> (~200 mL) and washed with water (2 x 100 mL), sat. aq. NaHCO<sub>3</sub> (50 mL), and brine (30 mL). The organic phase was separated, dried over MgSO<sub>4</sub>, and concentrated *in vacuo*. The residue was purified by column chromatography on silica gel (ethyl acetate – hexane gradient elution) to afford the title compound (3.04 g, 92%) as a white foam. Analytical data for **S10**: R<sub>f</sub> = 0.30 (ethyl acetate/hexane, 1/9, v/v); [ $\alpha$ ]<sub>D</sub><sup>21</sup> = -119.8 (c = 1.1, CHCl<sub>3</sub>); <sup>1</sup>H NMR (500 MHz, CDCl<sub>3</sub>):  $\delta$



7.35-8.09 (m, 10H, H-Ar), 6.25 (d,  $J = 1.5$  Hz, 1H, H-1), 5.65 (dd,  $J_{2,3} = 3.5$  Hz, 1H, H-2), 5.61 (dd,  $J_{3,4} = 10.1$  Hz, 1H, H-3), 3.91 (dq,  $J = 10.2, 6.2$  Hz, 1H, H-5), 3.85 (dd,  $J_{4,5} = 10.1$  Hz, 1H, H-4), 2.24 (s, 3H, -OC-CH<sub>3</sub>), 1.51 (d,  $J_{5,6} = 6.2$  Hz, 3H, H-6); <sup>13</sup>C NMR (126 MHz, CDCl<sub>3</sub>): δ 168.4, 165.4, 165.1, 133.7, 133.5, 129.9, 129.8, 129.1, 129.0, 128.6, 128.5, 90.7, 70.9, 69.4, 68.6, 63.0, 21.0, 18.7 ppm; HRMS (ESI):  $m/z$  calcd for C<sub>22</sub>H<sub>21</sub>N<sub>3</sub>O<sub>7</sub>Na [M+Na]<sup>+</sup>: 462.1272, found: 462.1265.

#### 4-Azido-2,3-di-*O*-benzoyl-4,6-dideoxy-α/β-D-mannopyranose (**S11**).

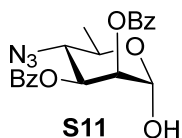

To a stirred solution of **S10** (0.224 g, 0.510 mmol) in DMF (1 mL) was added hydrazine acetate (0.056 g, 0.612 mmol) under argon atmosphere and stirred at 60 °C for 30 min. Then the mixture was cooled to 21 °C, diluted with ethyl acetate (50 mL), washed with water (2 x 50 mL) and brine (30 mL). The organic phase was separated, dried over MgSO<sub>4</sub>, and concentrated *in vacuo*. The residue was purified by column chromatography on silica gel (ethyl acetate – hexane gradient elution) to afford the title compound (0.191 g, 95%) as a white foam. Analytical data for **S11**:  $R_f = 0.30$  (ethyl acetate/hexane, 1/4, v/v); <sup>1</sup>H NMR (500 MHz, CDCl<sub>3</sub>): α:β ratio = 7:1; δ 7.11-8.06 (m, 20H, H-Ar), 5.78 (dd,  $J_{2,3} = 3.0$  Hz, 1H, H-2<sub>β</sub>), 5.66 (dd,  $J_{3,4} = 10$  Hz, 1H, H-3<sub>α</sub>), 5.63 (dd,  $J_{2,3} = 3.2$  Hz, 1H, H-2<sub>α</sub>), 5.36 (dd,  $J_{1,2} = 1.6$  Hz, 1H, H-1<sub>α</sub>), 5.30 (dd,  $J_{3,4} = 10.3$  Hz, 1H, H-3<sub>β</sub>), 5.07 (dd,  $J_{1,2} = 1.5$  Hz, 1H, H-1<sub>β</sub>), 4.04-4.13 (m, 1H, H-5<sub>α</sub>), 3.75 (dd,  $J_{4,5} = 10.1$  Hz, 1H, H-4<sub>α</sub>), 3.70 (dd,  $J_{4,5} = 10.0$  Hz, 1H, H-4<sub>β</sub>), 3.64 (d,  $J_{1,-OH} = 9.3$  Hz, 1H, OH<sub>β</sub>), 3.53 (m, 1H, H-5<sub>β</sub>), 3.14 (d,  $J_{1,-OH} = 3.8$  Hz, 1H, OH<sub>α</sub>), 1.52 (d,  $J_{5,6} = 6.0$  Hz, 3H, H-6<sub>β</sub>), 1.45 ppm (d,  $J_{5,6} = 6.2$  Hz, 3H, H-6<sub>α</sub>); <sup>13</sup>C NMR (126 MHz, CDCl<sub>3</sub>): δ 166.1, 165.5, 165.4, 133.8, 133.5, 133.4, 130.0, 129.8 (x2), 129.4, 129.2, 129.0 (x2), 128.9, 128.7, 128.6, 128.5, 128.4, 128.2, 92.9, 92.1, 73.3, 71.4, 70.9, 70.8, 70.2, 67.1, 63.6, 62.8, 18.7, 18.6 ppm; HRMS (ESI):  $m/z$  calcd for C<sub>20</sub>H<sub>19</sub>N<sub>3</sub>O<sub>6</sub>Na [M+Na]<sup>+</sup>: 420.1166, found: 420.1163.

**4-Azido-2,3-di-*O*-benzoyl-4,6-dideoxy- $\alpha$ -D-mannopyranosyl trichloroacetimidate (7).**

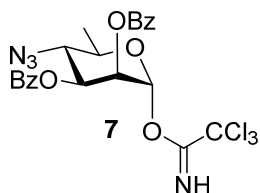

To a stirred solution of **S11** (2.0 g, 5.03 mmol) in CH<sub>2</sub>Cl<sub>2</sub> (20 mL) containing CCl<sub>3</sub>CN (10.1 mL, 100 mmol), DBU (0.150 mL, 1.00 mmol) was added at 21 °C under argon atmosphere. After 10 min, solvents were evaporated *in vacuo* and the residue was purified by column chromatography on silica gel (ethyl acetate – hexane gradient elution) to afford the title compound (2.335 g, 86 %) as off-white foam. Analytical data for **7**: *R<sub>f</sub>* = 0.60 (ethyl acetate/hexane, 1/4, v/v); [ $\alpha$ ]<sub>D</sub><sup>21</sup> = -101.9 (*c* = 1.0, CHCl<sub>3</sub>); <sup>1</sup>H NMR (500 MHz, CDCl<sub>3</sub>):  $\delta$  8.79 (s, 1H, *N-H*), 7.33-8.09 (m, 10H, H-Ar), 6.43 (d, *J*<sub>1,2</sub> = 1.5 Hz, 1H, H-1), 5.85 (dd, *J*<sub>2,3</sub> = 3.5 Hz, 1H, H-2), 5.68 (dd, *J*<sub>3,4</sub> = 10.5 Hz, 1H, H-3), 4.07 (dq, *J* = 10.2, 6.2 Hz, 1H, H-5), 3.88 (dd, *J*<sub>4,5</sub> = 10.2 Hz, 1H, H-4), 1.53 ppm (d, *J*<sub>5,6</sub> = 6.2 Hz, 3H, H-6); <sup>13</sup>C NMR (126 MHz, CDCl<sub>3</sub>):  $\delta$  165.3, 165.1, 160.0, 133.7, 133.5, 129.9, 129.8, 129.1, 129.0, 128.7, 128.5, 94.7, 90.7, 70.9, 69.9, 68.1, 62.9, 18.7 ppm; HRMS (ESI): *m/z* calcd for C<sub>22</sub>H<sub>19</sub>Cl<sub>3</sub>N<sub>4</sub>O<sub>6</sub>Na [M+Na]<sup>+</sup>: 563.0262, found: 563.0251.

**B. Synthesis of trichloroacetimidate glycosyl donor 8**

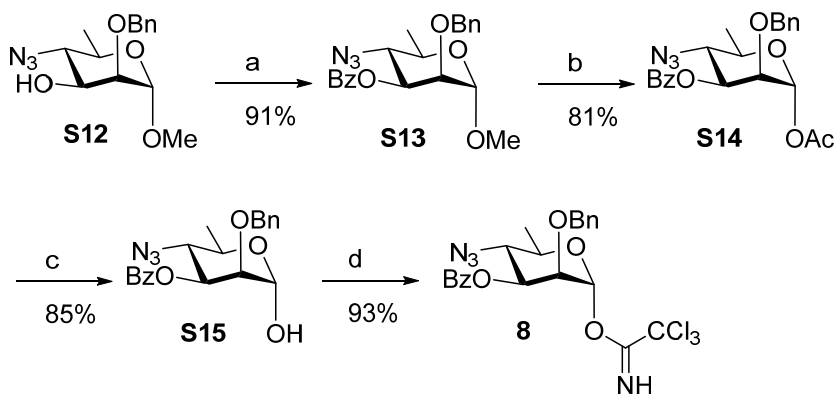

**Scheme 3S:** Conditions: a) BzCl, Py, rt, 3 h; b) Ac<sub>2</sub>O, AcOH, H<sub>2</sub>SO<sub>4</sub>, rt, 3 h; c) NH<sub>2</sub>NH<sub>2</sub>·AcOH, DMF, 60 °C, 0.5 h; d) CCl<sub>3</sub>CN, DBU, CH<sub>2</sub>Cl<sub>2</sub>, rt, 10 min.

**Methyl 4-azido-2-*O*-benzyl-4,6-dideoxy- $\alpha$ -D-mannopyranoside (S12).**

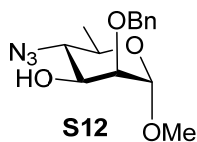

Analytical data for the title compound was essentially the same as previously described.<sup>3</sup>

**Methyl 4-azido-3-*O*-benzoyl-2-*O*-benzyl-4,6-dideoxy- $\alpha$ -D-mannopyranoside (S13).**

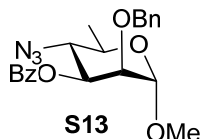

Benzoyl chloride (0.872 mL, 7.5 mmol) was added dropwise to a stirred solution of **S12** (2.0 g, 6.82 mmol) in pyridine (10 mL) containing DMAP (0.166 g, 1.36 mmol) at 0 °C. The resulting mixture was stirred under argon for 3 h at 21 °C. After that, CH<sub>3</sub>OH (2 mL) was added to the reaction mixture, stirred for 10 min, then diluted with CH<sub>2</sub>Cl<sub>2</sub> (~80 mL) and washed with aq. HCl (1M, 2 x 50 mL), water (100 mL), sat. aq. NaHCO<sub>3</sub> (50 mL), and brine (30 mL). The organic phase was separated, dried over MgSO<sub>4</sub>, and concentrated *in vacuo*. The residue was purified by column chromatography on silica gel (ethyl acetate – hexane gradient elution) to afford the title compound (2.47 g, 91%) as oil. Analytical data for **S13**: *R*<sub>f</sub> = 0.50 (ethyl acetate/hexane, 1/9, v/v); [ $\alpha$ ]<sub>D</sub><sup>21</sup> = -18.8 (c = 1.1, CHCl<sub>3</sub>); <sup>1</sup>H NMR (600 MHz, CDCl<sub>3</sub>):  $\delta$  7.13-8.10 (m, 10H, H-Ar), 5.32 (dd, *J*<sub>3,4</sub> = 10.4 Hz, 1H, H-3), 4.71 (d, *J*<sub>1,2</sub> = 1.4 Hz, 1H, H-1), 4.60 (dd, *J*<sup>2</sup> = 12.0 Hz, 2H, CH<sub>2</sub>Ph), 3.99 (dd, *J*<sub>2,3</sub> = 3.1 Hz, 1H, H-2), 3.81 (dd, *J*<sub>4,5</sub> = 10.2 Hz, 1H, H-4), 3.67 (dq, *J* = 10.2, 6.2 Hz, 1H, H-5), 3.37 (s, 3H, -OCH<sub>3</sub>), 1.42 ppm (d, *J*<sub>5,6</sub> = 6.2 Hz, 3H, H-6); <sup>13</sup>C NMR (126 MHz, CDCl<sub>3</sub>):  $\delta$  165.5, 137.5, 133.3, 129.9, 129.5, 128.5, 128.3, 127.8 (x2), 98.9, 74.8, 73.3, 73.2, 67.0, 63.2, 55.0, 18.5 ppm; HRMS (ESI): *m/z* calcd for C<sub>21</sub>H<sub>23</sub>N<sub>3</sub>O<sub>5</sub>Na [M+Na]<sup>+</sup>: 420.1530, found: 420.1521.

**1-*O*-Acetyl-4-azido-3-*O*-benzoyl-2-*O*-benzyl-4,6-dideoxy- $\alpha$ -D-mannopyranose (S14).**

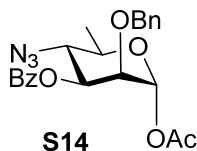

A solution of **S13** (1.40 g, 3.52 mmol) in acetic anhydride/acetic acid/sulfuric acid (50:20:0.5, 35 mL) was stirred at 21 °C for 3 h, and then poured into ice-cold 1M K<sub>2</sub>CO<sub>3</sub> solution (100 mL). The mixture was then diluted with CH<sub>2</sub>Cl<sub>2</sub> (~100 mL) and washed with

water (2 x 80 mL), sat. aq. NaHCO<sub>3</sub> (50 mL), and brine (30 mL). The organic phase was separated, dried over MgSO<sub>4</sub>, and concentrated *in vacuo*. The residue was purified by column chromatography on silica gel (ethyl acetate – hexane gradient elution) to afford the title compound (1.22 g, 81%) as a white foam. Analytical data for **S14**: *R<sub>f</sub>* = 0.30 (ethyl acetate/hexane, 1/9, v/v); [ $\alpha$ ]<sub>D</sub><sup>21</sup> = -9.9 (c = 1.5, CHCl<sub>3</sub>); <sup>1</sup>H NMR (500 MHz, CDCl<sub>3</sub>):  $\delta$  7.10-8.08 (m, 10H, H-Ar), 6.17 (d, *J*<sub>1,2</sub> = 1.3 Hz, 1H, H-1), 5.29 (dd, *J*<sub>3,4</sub> = 10.5 Hz, 1H, H-3), 4.62 (dd, *J*<sup>2</sup> = 12.0 Hz, 2H, CH<sub>2</sub>Ph), 4.00 (dd, *J*<sub>2,3</sub> = 3.5 Hz, 1H, H-2), 3.91 (dd, *J*<sub>4,5</sub> = 10.5 Hz, 1H, H-4), 3.78 (dq, *J* = 10.0, 6.1 Hz, 1H, H-5), 2.15 (s, 3H, -OC-CH<sub>3</sub>), 1.42 ppm (d, *J*<sub>5,6</sub> = 6.1 Hz, 3H, H-6); <sup>13</sup>C NMR (126 MHz, CDCl<sub>3</sub>):  $\delta$  169.0, 165.6, 136.9, 133.5, 129.9, 129.2, 128.5, 128.4, 128.0, 127.9, 91.1, 73.5, 73.0, 72.7, 69.6, 62.6, 21.0, 18.5 ppm; HRMS (ESI): *m/z* calcd for C<sub>22</sub>H<sub>23</sub>N<sub>3</sub>O<sub>6</sub>Na [M+Na]<sup>+</sup>: 448.1479, found: 448.1471.

#### 4-Azido-3-*O*-benzoyl-2-*O*-benzyl-4,6-dideoxy- $\alpha/\beta$ -D-mannopyranose (**S15**).

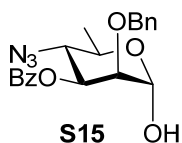

To a stirred solution of **S14** (1.190 g, 2.79 mmol) in DMF (10 mL) was added hydrazine acetate (0.310 g, 3.35 mmol) under argon atmosphere and stirred at 60 °C for 30 min. Then the mixture was cooled to 21 °C, diluted with ethyl acetate (100 mL), washed with water (2 x 80 mL) and brine (30 mL). The organic phase was separated, dried over MgSO<sub>4</sub>, and concentrated *in vacuo*. The residue was purified by column chromatography on silica gel (ethyl acetate – hexane gradient elution) to afford the title compound (0.912 g, 85%) as a white foam. Analytical data for **S15**: *R<sub>f</sub>* = 0.30 (ethyl acetate/hexane, 1/4, v/v); <sup>1</sup>H NMR (500 MHz, CDCl<sub>3</sub>):  $\alpha/\beta$  ratio = 5:1;  $\delta$  7.16-8.14 (m, 20H, H-Ar), 5.43 (dd, *J*<sub>3,4</sub> = 10.4 Hz, 1H, H-3 <sub>$\alpha$</sub> ), 5.27 (dd, *J*<sub>1,2</sub> = 1.8 Hz, *J*<sub>1,-OH</sub> = 3.3 Hz, 1H, H-1 <sub>$\alpha$</sub> ), 5.13 (dd, *J*<sub>3,4</sub> = 10.5 Hz, 1H, H-3 <sub>$\beta$</sub> ), 4.72 (dd, *J*<sup>2</sup> = 11.6 Hz, 2H, CH<sub>2</sub>Ph <sub>$\beta$</sub> ), 4.82 (dd, *J*<sub>1,2</sub> = 1.5 Hz, *J*<sub>1,-OH</sub> = 11.6 Hz, 1H, H-1 <sub>$\beta$</sub> ), 4.63 (dd, *J*<sup>2</sup> = 12.0 Hz, 2H, CH<sub>2</sub>Ph <sub>$\alpha$</sub> ), 4.14 (dd, *J*<sub>2,3</sub> = 3.0 Hz, 1H, H-2 <sub>$\beta$</sub> ), 4.06 (dd, *J*<sub>2,3</sub> = 3.1 Hz, 1H, H-2 <sub>$\alpha$</sub> ), 3.97 (dq, *J* = 10.0, 6.1 Hz, 1H, H-5 <sub>$\alpha$</sub> ), 3.83 (dd, *J*<sub>4,5</sub> = 10.5 Hz, 1H, H-4 <sub>$\alpha$</sub> ), 3.77 (dd, *J*<sub>4,5</sub> = 10.0 Hz, 1H, H-4 <sub>$\beta$</sub> ), 3.58 (d, *J*<sub>1,-OH</sub> = 11.6 Hz, 1H, -OH <sub>$\beta$</sub> ), 3.40 (dq, *J* = 10.0, 6.2 Hz, 1H, H-5 <sub>$\beta$</sub> ), 2.83 (d, *J*<sub>1,-OH</sub> = 3.5 Hz, 1H, -OH <sub>$\alpha$</sub> ), 1.46 (d, *J*<sub>5,6</sub> = 6.2 Hz, 3H, H-6 <sub>$\beta$</sub> ), 1.42 ppm (d, *J*<sub>5,6</sub> = 6.1 Hz, 3H, H-6 <sub>$\alpha$</sub> ); <sup>13</sup>C NMR (126 MHz, CDCl<sub>3</sub>):  $\delta$  165.6 (x2), 137.4, 137.1, 133.8, 133.4, 129.9, 129.5, 128.9, 128.7, 128.5, 128.3 (x2), 128.2, 127.9, 127.8, 93.2, 92.7, 76.3,

75.8, 75.7, 75.0, 73.3, 72.9, 70.9, 67.2, 63.2, 62.6, 18.6, 18.5 ppm; HRMS (ESI):  $m/z$  calcd for  $C_{20}H_{21}N_3O_5Na$   $[M+Na]^+$ : 406.1373, found: 406.1366.

**4-Azido-3-*O*-benzoyl-2-*O*-benzyl-4,6-dideoxy- $\alpha$ -D-mannopyranosyl trichloroacetimidate (8).**

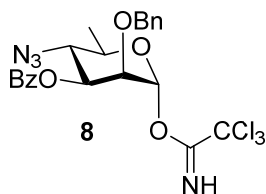

To a stirred solution of **S15** (0.890 g, 2.32 mmol) in  $CH_2Cl_2$  (15 mL) containing  $CCl_3CN$  (4.65 mL, 46.4 mmol), DBU (70  $\mu$ L, 0.464 mmol) was added at 21 °C under argon atmosphere. After 10 min, solvents were evaporated *in vacuo* and the residue was purified by column chromatography on silica gel (ethyl acetate – hexane gradient elution) to afford the title compound (1.136 g, 93 %) as off-white foam. Analytical data for **8**:  $R_f$  = 0.80 (ethyl acetate/toluene, 1/9, v/v);  $[\alpha]_D^{21}$  = -7.3 ( $c$  = 1.5,  $CHCl_3$ );  $^1H$  NMR (600 MHz,  $CDCl_3$ ):  $\delta$  8.66 (s, 1H, -C=NH), 7.12-8.10 (m, 10H, H-Ar), 6.36 (d,  $J_{1,2}$  = 1.8 Hz, 1H, H-1), 5.39 (dd,  $J_{3,4}$  = 7.2 Hz, 1H, H-3), 4.67 (dd,  $J^2$  = 12.0 Hz, 2H,  $CH_2Ph$ ), 4.26 (dd,  $J_{2,3}$  = 3.1 Hz, 1H, H-2), 3.91-3.99 (m, 2H, H-4, H-5), 1.48 ppm (d,  $J_{5,6}$  = 6.0 Hz, 3H, H-6);  $^{13}C$  NMR (126 MHz,  $CDCl_3$ ):  $\delta$  165.5, 160.4, 137.0, 133.5, 129.9, 129.2, 128.5, 128.4, 128.0 (x2), 127.9, 95.3, 90.8, 73.2, 73.0, 72.8, 70.1, 62.5, 18.6 ppm; HRMS (ESI):  $m/z$  calcd for  $C_{22}H_{21}Cl_3N_4O_5Na$   $[M+Na]^+$ : 549.0470, found: 549.0465.

**C. Synthesis of trichloroacetimidate glycosyl donor 9**

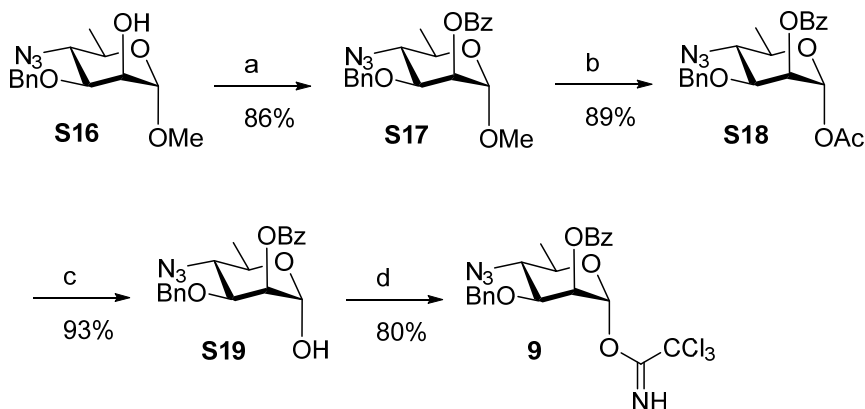

**Scheme 4S:** Conditions: a)  $BzCl$ , Py, rt, 3 h; b)  $Ac_2O$ , AcOH,  $H_2SO_4$ , rt, 3 h; c)  $NH_2NH_2.AcOH$ , DMF, 60 °C, 0.5 h; d)  $CCl_3CN$ , DBU,  $CH_2Cl_2$ , rt, 10 min.

**Methyl 4-azido-3-*O*-benzyl-4,6-dideoxy- $\alpha$ -D-mannopyranoside (S16).**

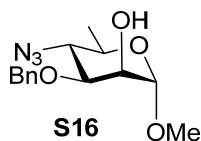

Analytical data for the title compound was essentially the same as previously described.<sup>1a</sup>

**Methyl 4-azido-2-*O*-benzoyl-3-*O*-benzyl-4,6-dideoxy- $\alpha$ -D-mannopyranoside (S17).**

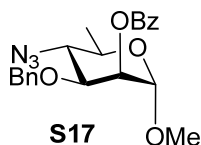

Benzoyl chloride (0.872 mL, 7.5 mmol) was added dropwise to a stirred solution of **S16** (2.0 g, 6.82 mmol) in pyridine (10 mL) containing DMAP (0.166 g, 1.36 mmol) at 0 °C. The resulting mixture was stirred under argon for 3 h at 21 °C. After that, CH<sub>3</sub>OH (2 mL) was added to the reaction mixture, stirred for 10 min, then diluted with CH<sub>2</sub>Cl<sub>2</sub> (~80 mL) and washed with aq. HCl (1M, 2 x 50 mL), water (100 mL), sat. aq. NaHCO<sub>3</sub> (50 mL), and brine (30 mL). The organic phase was separated, dried over MgSO<sub>4</sub>, and concentrated *in vacuo*. The residue was purified by column chromatography on silica gel (ethyl acetate – hexane gradient elution) to afford the title compound (2.32 g, 86%) as a white foam. Analytical data for **S17**: *R*<sub>f</sub> = 0.50 (ethyl acetate/hexane, 1/9, v/v); [ $\alpha$ ]<sub>D</sub><sup>21</sup> = -27.9 (c = 1.7, CHCl<sub>3</sub>); <sup>1</sup>H NMR (500 MHz, CDCl<sub>3</sub>):  $\delta$  7.21-8.10 (m, 10H, H-Ar), 5.55 (dd, *J*<sub>2,3</sub> = 3.2 Hz, 1H, H-2), 4.77 (d, *J*<sub>1,2</sub> = 1.8 Hz, 1H, H-1), 4.66 (dd, *J*<sup>2</sup> = 11.5 Hz, 2H, CH<sub>2</sub>Ph), 3.91 (dd, *J*<sub>3,4</sub> = 9.7 Hz, 1H, H-3), 3.55-3.64 (m, 1H, H-5), 3.51 (dd, *J*<sub>4,5</sub> = 10.0 Hz, 1H, H-4), 3.37 (s, 3H, -OCH<sub>3</sub>), 1.38 ppm (d, *J*<sub>5,6</sub> = 6.0 Hz, 3H, H-6); <sup>13</sup>C NMR (126 MHz, CDCl<sub>3</sub>):  $\delta$  165.6, 137.3, 133.3, 129.9, 129.7, 128.4, 128.3, 128.1, 127.8, 98.8, 76.1, 71.4, 67.8, 66.8, 64.3, 55.1, 18.7 ppm; HRMS (ESI): *m/z* calcd for C<sub>21</sub>H<sub>23</sub>N<sub>3</sub>O<sub>5</sub>Na [M+Na]<sup>+</sup>: 420.1530, found: 420.1528.

**1-*O*-Acetyl-4-azido-2-*O*-benzoyl-3-*O*-benzyl-4,6-dideoxy- $\alpha$ / $\beta$ -D-mannopyranose (S18).**

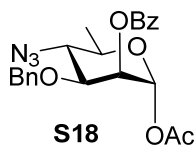

A solution of **S17** (2.06 g, 5.19 mmol) in acetic anhydride/acetic acid/sulfuric acid (50:20:0.5, 35 mL) was stirred at 21 °C for 3 h, and then poured into ice-cold 1M K<sub>2</sub>CO<sub>3</sub>

solution (100 mL). The mixture was then diluted with CH<sub>2</sub>Cl<sub>2</sub> (~100 mL) and washed with water (2 x 80 mL), sat. aq. NaHCO<sub>3</sub> (50 mL), and brine (30 mL). The organic phase was separated, dried over MgSO<sub>4</sub>, and concentrated *in vacuo*. The residue was purified by column chromatography on silica gel (ethyl acetate – hexane gradient elution) to afford the title compound (1.95 g, 89%) as a white foam.  $\alpha$ : $\beta$  ratio = 9:1 (isolated yield); Analytical data for **S18**:  $\alpha$ : $\beta$  ratio = 9:1 (isolated yield);  $\alpha$ -anomer:  $R_f$  = 0.45 (ethyl acetate/hexane, 1.5/8.5, v/v);  $[\alpha]_D^{21}$  = +1.8 ( $c$  = 1.9, CHCl<sub>3</sub>); <sup>1</sup>H NMR (500 MHz, CDCl<sub>3</sub>):  $\delta$  7.27-8.09 (m, 10H, H-Ar), 6.16 (d,  $J_{1,2}$  = 2.0 Hz, 1H, H-1), 5.56 55 (dd,  $J_{2,3}$  = 3.2 Hz, 1H, H-2), 4.70 (dd,  $J^2$  = 11.5 Hz, 2H, CH<sub>2</sub>Ph), 3.91 (dd,  $J_{3,4}$  = 10.0 Hz, 1H, H-3), 3.64-3.73 (m, 1H, H-5), 3.58 (dd,  $J_{4,5}$  = 10.0 Hz, 1H, H-4), 2.13 (s, 3H, -OC-CH<sub>3</sub>), 1.40 ppm (d,  $J_{5,6}$  = 6.0 Hz, 3H, H-6); <sup>13</sup>C NMR (126 MHz, CDCl<sub>3</sub>):  $\delta$  168.3, 165.3, 136.9, 133.5, 129.9, 129.3, 128.5, 128.4, 128.2, 128.0, 91.1, 75.8, 71.6, 69.3, 66.7, 63.8, 20.9, 18.7 ppm; HRMS (ESI):  $m/z$  calcd for C<sub>22</sub>H<sub>23</sub>N<sub>3</sub>O<sub>6</sub>Na [M+Na]<sup>+</sup>: 448.1479, found: 448.1475;  $\beta$ -anomer:  $R_f$  = 0.40 (ethyl acetate/hexane, 1.5/8.5, v/v);  $[\alpha]_D^{21}$  = -50.2 ( $c$  = 1.2, CHCl<sub>3</sub>); <sup>1</sup>H NMR (500 MHz, CDCl<sub>3</sub>):  $\delta$  7.27-8.13 (m, 10H, H-Ar), 5.82 (dd,  $J_{2,3}$  = 3.5 Hz, 1H, H-2), 5.77 (d,  $J_{1,2}$  = 1.5 Hz, 1H, H-1), 4.66 (dd,  $J^2$  = 11.4 Hz, 2H, CH<sub>2</sub>Ph), 3.68 (dd,  $J_{3,4}$  = 9.7 Hz, 1H, H-3), 3.53 (dd,  $J_{4,5}$  = 9.8 Hz, 1H, H-4), 3.34-3.44 (m, 1H, H-5), 2.03 (s, 3H, -OC-CH<sub>3</sub>), 1.46 ppm (d,  $J_{5,6}$  = 6.0 Hz, 3H, H-6); <sup>13</sup>C NMR (126 MHz, CDCl<sub>3</sub>):  $\delta$  168.8, 165.8, 136.6, 133.4, 130.0, 129.5, 128.5 (x2), 128.3, 128.1, 91.2, 78.1, 72.1, 71.4, 66.8, 63.6, 20.8, 18.6 ppm; HRMS (ESI):  $m/z$  calcd for C<sub>22</sub>H<sub>23</sub>N<sub>3</sub>O<sub>6</sub>Na [M+Na]<sup>+</sup>: 448.1479, found: 448.1474.

#### 4-Azido-2-*O*-benzoyl-3-*O*-benzyl-4,6-dideoxy- $\alpha$ / $\beta$ -D-mannopyranose (**S19**).

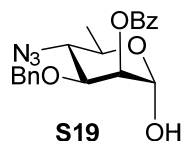

To a stirred solution of **S18** (2.20 g, 5.17 mmol) in DMF (7 mL) was added hydrazine acetate (0.572 g, 6.20 mmol) under argon atmosphere and stirred at 60 °C for 30 min. Then the mixture was cooled to 21 °C, diluted with ethyl acetate (100 mL), washed with water (2 x 80 mL) and brine (30 mL). The organic phase was separated, dried over MgSO<sub>4</sub>, and concentrated *in vacuo*. The residue was purified by column chromatography on silica gel (ethyl acetate – hexane gradient elution) to afford the title compound (1.83 g, 93%) as a white foam. Analytical data for **S19**:  $R_f$  = 0.30 (ethyl acetate/hexane, 1/4, v/v); <sup>1</sup>H NMR (500 MHz, CDCl<sub>3</sub>):  $\alpha$ : $\beta$  ratio = 5:1;  $\delta$  7.25-8.15 (m, 20H, H-Ar), 5.74 (dd,  $J_{2,3}$  = 3.5 Hz, 1H, H-

2<sub>β</sub>), 5.60 (dd,  $J_{2,3} = 3.1$  Hz, 1H, H-2<sub>α</sub>), 5.32 (d,  $J_{1,2} = 1.3$  Hz, 1H, H-1<sub>α</sub>), 4.89 (s, 1H, H-1<sub>β</sub>), 4.73 (dd,  $J^2 = 11.4$  Hz, 2H, CH<sub>2</sub>Ph<sub>β</sub>), 4.70 (dd,  $J^2 = 11.4$  Hz, 2H, CH<sub>2</sub>Ph<sub>α</sub>), 4.02 (dd,  $J_{3,4} = 9.9$  Hz, 1H, H-3<sub>α</sub>), 3.84-3.94 (m, 1H, H-5<sub>α</sub>), 3.64 (dd,  $J_{3,4} = 9.7$  Hz, 1H, H-3<sub>β</sub>), 3.56 (dd,  $J_{4,5} = 10.0$  Hz, 1H, H-4<sub>α</sub>), 3.48 (dd,  $J_{4,5} = 9.8$  Hz, 1H, H-4<sub>β</sub>), 3.33 (m, 1H, H-5<sub>β</sub>), 3.05 (br. s., 2H, -OH<sub>α</sub>, -OH<sub>β</sub>), 1.47 (d,  $J_{5,6} = 6.2$  Hz, 3H, H-6<sub>β</sub>), 1.40 ppm (d,  $J_{5,6} = 6.1$  Hz, 3H, H-6<sub>α</sub>); <sup>13</sup>C NMR (126 MHz, CDCl<sub>3</sub>): δ 166.3, 165.7, 137.2, 136.8, 133.6, 133.3, 130.0, 129.9, 129.6, 129.2, 128.5, 128.4 (x2), 128.3, 128.2, 128.0, 127.8, 93.2, 92.5, 78.5, 75.6, 71.5 (x2), 71.3, 69.2, 68.2, 67.1, 64.3, 63.7, 18.7 (x2) ppm; HRMS (ESI):  $m/z$  calcd for C<sub>20</sub>H<sub>21</sub>N<sub>3</sub>O<sub>5</sub>Na [M+Na]<sup>+</sup>: 406.1373, found: 406.1374.

**4-Azido-2-*O*-benzoyl-3-*O*-benzyl-4,6-dideoxy-α-D-mannopyranosyl trichloroacetimidate (9).**

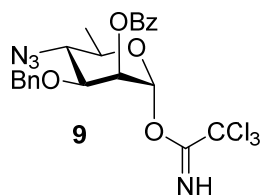

To a stirred solution of **S19** (1.820 g, 4.75 mmol) in CH<sub>2</sub>Cl<sub>2</sub> (20 mL) containing CCl<sub>3</sub>CN (9.50 mL, 95.0 mmol), DBU (140 μL, 0.95 mmol) was added at 21 °C under argon atmosphere. After 10 min, solvents were evaporated *in vacuo* and the residue was purified by column chromatography on silica gel (ethyl acetate – hexane gradient elution) to afford the title compound (2.0 g, 80%) as off-white foam. Analytical data for **9**:  $R_f = 0.60$  (ethyl acetate/hexane, 1/4, v/v);  $[\alpha]_D^{21} = -10.8$  (c = 1.0, CHCl<sub>3</sub>); <sup>1</sup>H NMR (500 MHz, CDCl<sub>3</sub>): δ 8.70 (s, 1H, -C=NH), 7.28-8.12 (m, 10H, H-Ar), 6.31 (d,  $J_{1,2} = 1.8$  Hz, 1H, H-1), 5.67 (dd,  $J_{2,3} = 3.5$  Hz, 1H, H-2), 4.70 (dd,  $J^2 = 11.4$  Hz, 2H, CH<sub>2</sub>Ph), 3.98 (dd,  $J_{3,4} = 10.0$  Hz, 1H, H-3), 3.73-3.84 (m, 1H, H-5), 3.57-3.66 (dd,  $J_{4,5} = 10.0$  Hz, 1H, H-4), 1.38-1.44 ppm (d,  $J_{5,6} = 6.5$  Hz, 3H, H-6); <sup>13</sup>C NMR (126 MHz, CDCl<sub>3</sub>): δ 165.3, 159.8, 136.7, 133.5, 129.9, 129.3, 128.6 (x3), 128.5 (x2), 128.4, 128.1, 95.0, 90.7, 75.2, 71.6, 69.9, 66.4, 63.7, 18.7 ppm; HRMS (ESI):  $m/z$  calcd for C<sub>22</sub>H<sub>21</sub>Cl<sub>3</sub>N<sub>4</sub>O<sub>5</sub>Na [M+Na]<sup>+</sup>: 549.0470, found: 549.0475.



#### D. Synthesis of thiglycoside donors 10 & 11

##### **Ethyl 4-azido-3-*O*-benzyl-4,6-dideoxy-1-thio- $\alpha$ -D-mannopyranoside (**12**).**

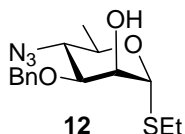

Analytical data for the title compound was essentially the same as previously described.<sup>4</sup>

##### **Ethyl 4-azido-2,3-di-*O*-benzoyl-4,6-dideoxy- $\alpha$ -D-mannopyranosyl (1→2) 4-azido-3-*O*-benzyl-4,6-dideoxy-1-thio- $\alpha$ -D-mannopyranoside (**10**).**

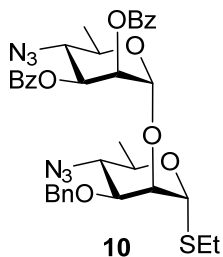

A mixture of glycosyl donor **7** (1.010 g, 1.87 mmol), glycosyl acceptor **12** (0.550 g, 1.70 mmol), and freshly activated molecular sieves (3 Å, 2.0 g) in CH<sub>2</sub>Cl<sub>2</sub> (30 mL) was stirred under argon for 5 h at 21 °C. TMSOTf (67 μL, 0.374 mmol) was added and the resulting mixture was stirred for additional 1 h. After that, Et<sub>3</sub>N (1 mL) was added, the solid was filtered off and the residue was rinsed with CH<sub>2</sub>Cl<sub>2</sub> (3 x 20 mL). The combined filtrate (~100 mL) was washed with sat. aq. NaHCO<sub>3</sub> (50 mL), water (50 mL), and brine (30 mL). The organic phase was separated, dried over MgSO<sub>4</sub>, and concentrated *in vacuo*. The residue was purified by column chromatography on silica gel (ethyl acetate – toluene gradient elution) to afford the title compound (1.073 g, 90%) as a white foam. Analytical data for **10**: *R*<sub>f</sub> = 0.70 (ethyl acetate/toluene, 1/9, v/v); [ $\alpha$ ]<sub>D</sub><sup>21</sup> = -18.4 (*c* = 1.1, CHCl<sub>3</sub>); <sup>1</sup>H NMR (600 MHz, CDCl<sub>3</sub>):  $\delta$  7.12-8.03 (m, 15H, H-Ar), 5.70 (dd, *J*<sub>2,3</sub> = 3.2 Hz, 1H, H-2<sup>B</sup>), 5.62 (dd, *J*<sub>3,4</sub> = 10.3 Hz, 1H, H-3<sup>B</sup>), 5.24 (d, *J*<sub>1,2</sub> = 1.5 Hz, 1H, H-1<sup>A</sup>), 4.98 (d, *J*<sub>1,2</sub> = 1.5 Hz, 1H, H-1<sup>B</sup>), 4.67 (dd, *J*<sup>2</sup> = 12.0 Hz, 2H, CH<sub>2</sub>Ph), 3.93-3.97 (m, 2H, H-2<sup>A</sup>, H-5<sup>B</sup>), 3.83-3.87 (m, 1H, H-5<sup>A</sup>), 3.73 (dd, *J*<sub>4,5</sub> = 10.5 Hz, 1H, H-4<sup>B</sup>), 3.70 (dd, *J*<sub>3,4</sub> = 9.8 Hz, 1H, H-3<sup>A</sup>), 3.60 (dd, *J*<sub>4,5</sub> = 10.5 Hz, 1H, H-4<sup>A</sup>), 2.54-2.67 (m, 2H, S-CH<sub>2</sub>-), 1.44 (d, *J*<sub>5,6</sub> = 6.2 Hz, 3H, H-6<sup>B</sup>), 1.37 (d, *J*<sub>5,6</sub> = 6.1 Hz, 3H, H-6<sup>A</sup>), 1.29 ppm (t, *J* = 7.4 Hz, 3H, S-CH<sub>2</sub>-CH<sub>3</sub>); <sup>13</sup>C NMR (126 MHz, CDCl<sub>3</sub>):  $\delta$  165.2, 164.9, 137.4, 133.4, 133.3, 129.8 (x2), 129.5, 129.3, 128.5 (x2), 128.4, 128.1, 127.9, 99.4, 83.3, 78.4, 76.5, 72.4, 70.8, 69.5, 67.8, 67.6, 64.2, 63.5, 25.6, 18.6, 18.4, 14.9 ppm; HRMS (ESI): *m/z* calcd for C<sub>35</sub>H<sub>38</sub>N<sub>6</sub>O<sub>8</sub>SNa [M+Na]<sup>+</sup>: 725.2364, found: 725.2350.

**Ethyl 4-azido-2-*O*-benzoyl-3-*O*-benzyl-4,6-dideoxy- $\alpha$ -D-mannopyranosyl (1 $\rightarrow$ 2) 4-azido-3-*O*-benzyl-4,6-dideoxy-1-thio- $\alpha$ -D-mannopyranoside (**11**).**

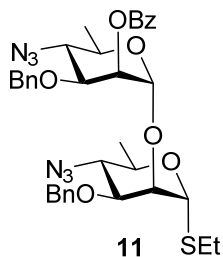

A mixture of glycosyl donor **9** (1.980 g, 3.76 mmol), glycosyl acceptor **12** (1.106 g, 3.42 mmol), and freshly activated molecular sieves (3 Å, 4.0 g) in CH<sub>2</sub>Cl<sub>2</sub> (30 mL) was stirred under argon for 5 h at 21 °C. TMSOTf (0.136 mL, 0.753 mmol) was added and the resulting mixture was stirred for additional 1 h. After that, Et<sub>3</sub>N (1 mL) was added, the solid was filtered off and the residue was rinsed with CH<sub>2</sub>Cl<sub>2</sub> (3 x 30 mL). The combined filtrate (~120 mL) was washed with sat. aq. NaHCO<sub>3</sub> (50 mL), water (50 mL), and brine (30 mL). The organic phase was separated, dried over MgSO<sub>4</sub>, and concentrated *in vacuo*. The residue was purified by column chromatography on silica gel (ethyl acetate – toluene gradient elution) to afford the title compound (2.010 g, 85%) as a white foam. Analytical data for **11**: *R*<sub>f</sub> = 0.50 (ethyl acetate/hexane, 1/9, v/v); [ $\alpha$ ]<sub>D</sub><sup>21</sup> = +50.0 (*c* = 1.4, CHCl<sub>3</sub>); <sup>1</sup>H NMR (500 MHz, CDCl<sub>3</sub>):  $\delta$  7.21-8.11 (m, 15H, H-Ar), 5.63 (dd, *J*<sub>2,3</sub> = 2.5 Hz, 1H, H-2<sup>B</sup>), 5.22 (d, *J*<sub>1,2</sub> = 1.0 Hz, 1H, H-1<sup>A</sup>), 4.95 (d, *J*<sub>1,2</sub> = 1.7 Hz, 1H, H-1<sup>B</sup>), 4.72 (dd, *J*<sup>2</sup> = 11.4 Hz, 2H, CH<sub>2</sub>Ph), 4.67 (dd, *J*<sup>2</sup> = 12.0 Hz, 2H, CH<sub>2</sub>Ph), 3.91-3.97 (m, 2H, H-2<sup>A</sup>, H-3<sup>B</sup>), 3.81-3.90 (dq, 1H, *J*<sub>4,5</sub> = 9.5 Hz, *J*<sub>5,6</sub> = 6.0 Hz, H-5<sup>A</sup>), 3.72-3.78 (dq, 1H, *J*<sub>4,5</sub> = 10.0 Hz, *J*<sub>5,6</sub> = 6.0 Hz, H-5<sup>B</sup>), 3.70 (dd, *J*<sub>3,4</sub> = 9.9 Hz, 1H, H-3<sup>A</sup>), 3.54 (dd, *J*<sub>4,5</sub> = 10.0 Hz, 1H, H-4<sup>B</sup>), 3.39 (dd, *J*<sub>4,5</sub> = 10.0 Hz, 1H, H-4<sup>A</sup>), 2.50 - 2.69 (m, 2H, S-CH<sub>2</sub>-), 1.37 (d, *J*<sub>5,6</sub> = 6.2 Hz, 3H, H-6<sup>B</sup>), 1.33 (d, *J*<sub>5,6</sub> = 6.2 Hz, 3H, H-6<sup>A</sup>), 1.28 ppm (t, *J* = 7.3 Hz, 3H, S-CH<sub>2</sub>-CH<sub>3</sub>); <sup>13</sup>C NMR (126 MHz, CDCl<sub>3</sub>):  $\delta$  165.3, 137.3, 137.1, 133.3, 129.9, 129.7, 128.6, 128.5, 128.4 (x2), 128.2, 128.1, 127.9, 99.6, 83.3, 78.1, 76.6, 75.3, 72.3, 71.4, 67.7, 67.6, 64.4, 64.1, 25.6, 18.7, 18.5, 14.9 ppm; HRMS (ESI): *m/z* calcd for C<sub>35</sub>H<sub>40</sub>N<sub>6</sub>O<sub>7</sub>SNa [M+Na]<sup>+</sup>: 711.2571, found: 711.2570.

#### IV. SYNTHESIS OF OLIGOSACCHARIDES 1-6

##### 5'-Methoxycarbonylpentyl 4-azido-2-*O*-benzyl-4,6-dideoxy- $\alpha$ -D-mannopyranoside (**13**).

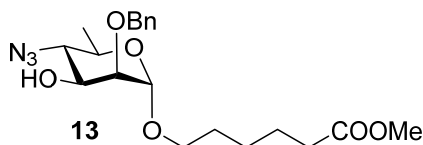

Analytical data for the title compound was essentially the same as previously described.<sup>3b</sup>

##### 5'-Methoxycarbonylpentyl 4-azido-3-*O*-benzyl-4,6-dideoxy- $\alpha$ -D-mannopyranoside (**14**).

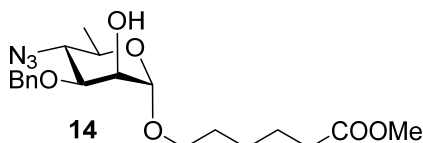

Analytical data for the title compound was essentially the same as previously described.<sup>5</sup>

##### 5'-Methoxycarbonylpentyl 4-azido-2,3-di-*O*-benzoyl-4,6-dideoxy- $\alpha$ -D-mannopyranosyl (1→3) 4-azido-2-*O*-benzyl-4,6-dideoxy- $\alpha$ -D-mannopyranoside (**15**).

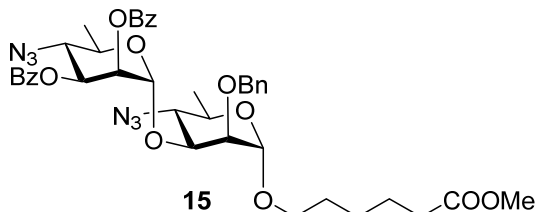

A mixture of glycosyl donor **7** (0.292 g, 0.540 mmol), glycosyl acceptor **13** (0.200 g, 0.491 mmol) and freshly activated molecular sieves (3 Å, 0.6 g) in CH<sub>2</sub>Cl<sub>2</sub> (8 mL) was stirred under argon for 5 h at 21 °C. TMSOTf (20 μL, 0.108 mmol) was added and the resulting mixture was stirred for additional 1 h. After that, Et<sub>3</sub>N (1 mL) was added, the solid was filtered off and the residue was rinsed with CH<sub>2</sub>Cl<sub>2</sub> (3 x 20 mL). The combined filtrate (80 mL) was washed with sat. aq. NaHCO<sub>3</sub> (40 mL), water (30 mL), and brine (20 mL). The organic phase was separated, dried over MgSO<sub>4</sub>, and concentrated *in vacuo*. The residue was purified by column chromatography on silica gel (ethyl acetate – toluene gradient elution) to afford the title compound (0.374 g, 97%) as a white foam. Analytical data for **15**: *R*<sub>f</sub> = 0.40 (ethyl acetate/toluene, 0.5/9.5, v/v); [α]<sub>D</sub><sup>21</sup> = -41.2 (c = 1.6, CHCl<sub>3</sub>); <sup>1</sup>H NMR (600 MHz, CDCl<sub>3</sub>): δ 7.29-8.06 (m, 15H, H-Ar), 5.72 (dd, *J*<sub>2,3</sub> = 3.3 Hz, 1H, H-2<sup>B</sup>), 5.66 (dd, *J*<sub>3,4</sub> = 10.3 Hz, 1H, H-3<sup>B</sup>), 5.29 (d, *J*<sub>1,2</sub> = 1.8 Hz, 1H, H-1<sup>B</sup>), 4.82 (d, *J*<sub>1,2</sub> = 1.8 Hz, 1H, H-1<sup>A</sup>), 4.73 (dd, *J*<sup>2</sup> = 12.0 Hz, 2H, CH<sub>2</sub>Ph), 3.95 (dd, *J*<sub>3,4</sub> = 10.1 Hz, 1H, H-3<sup>A</sup>), 3.88 (dq, *J* = 10.0, 6.1 Hz, 1H, H-5<sup>B</sup>),

3.76 (dd,  $J_{4,5} = 10.0$  Hz, 1H, H-4<sup>B</sup>), 3.72 (dd,  $J_{2,3} = 3.1$  Hz, 1H, H-2<sup>A</sup>), 3.68 (dd,  $J_{4,5} = 10.2$  Hz, 1H, H-4<sup>A</sup>), 3.66 (s, 3H, -OCH<sub>3</sub>), 3.63 (dt,  $J = 9.6, 6.7$  Hz, 1H, -O-CH<sub>2a</sub>-), 3.52 (dq,  $J = 10.2, 6.2$  Hz, 1H, H-5<sup>A</sup>), 3.36 (dt,  $J = 9.6, 6.5$  Hz, 1H, -O-CH<sub>2b</sub>-), 2.31 (t,  $J = 7.8$  Hz, 2H, -CH<sub>2f</sub>-), 1.61-1.66 (m, 2H, -CH<sub>2e</sub>-), 1.52 - 1.59 (m, 2H, -CH<sub>2c</sub>-), 1.37 (d,  $J_{5,6} = 6.0$  Hz, 3H, H-6<sup>B</sup>), 1.36 (d,  $J_{5,6} = 6.0$  Hz, 3H, H-6<sup>A</sup>), 1.32-1.36 ppm (m, 2H, -CH<sub>2d</sub>-); <sup>13</sup>C NMR (126 MHz, CDCl<sub>3</sub>): δ 174.0, 165.2, 165.1, 137.6, 133.5, 133.3, 129.8, 129.4, 129.3, 128.6, 128.5, 128.4, 127.9, 127.6, 99.2, 97.0, 78.6, 72.5, 70.7, 70.0, 67.7, 67.6 (x2), 64.7, 63.4, 51.5, 33.9, 29.0, 25.7, 24.6, 18.6, 18.5 ppm; HRMS (ESI):  $m/z$  calcd for C<sub>40</sub>H<sub>46</sub>N<sub>6</sub>O<sub>11</sub>Na [M+Na]<sup>+</sup>: 809.3117, found: 809.3107.

**5'-Methoxycarbonylpentyl 4-azido-2,3-di-*O*-benzoyl-4,6-dideoxy- $\alpha$ -D-mannopyranosyl (1 $\rightarrow$ 2) 4-azido-3-*O*-benzyl-4,6-dideoxy- $\alpha$ -D-mannopyranosyl (1 $\rightarrow$ 3) 4-azido-2-*O*-benzyl-4,6-dideoxy- $\alpha$ -D-mannopyranoside (16).**

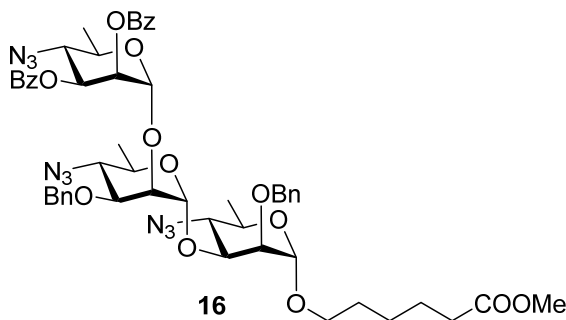

*MeOTf-promoted glycosylation.* A mixture of glycosyl donor **10** (0.151 g, 0.216 mmol), glycosyl acceptor **13** (0.080 g, 0.196 mmol) and freshly activated molecular sieves (3 Å, 0.5 g) in CH<sub>2</sub>Cl<sub>2</sub> (4 mL) was stirred under argon for 5 h at 21 °C. MeOTf (133 μL, 1.17 mmol) was added and continued stirring for additional 48 h. After that, Et<sub>3</sub>N (1 mL) was added, the solid was filtered off and the residue was rinsed with CH<sub>2</sub>Cl<sub>2</sub> (3 x 20 mL). The combined filtrate (70 mL) was washed with sat. aq. NaHCO<sub>3</sub> (40 mL), water (30 mL), and brine (20 mL). The organic phase was separated, dried over MgSO<sub>4</sub>, and concentrated *in vacuo*. The residue was purified by column chromatography on silica gel (ethyl acetate – toluene gradient elution) to afford the title compound (0.182 g, 89%) as a white foam. Analytical data for **16**:  $R_f = 0.40$  (ethyl acetate/toluene, 0.5/9.5, v/v);  $[\alpha]_D^{21} = -27.7$  (c = 2.4, CHCl<sub>3</sub>); <sup>1</sup>H NMR (600 MHz, CDCl<sub>3</sub>): δ 7.06-8.01 (m, 20H, H-Ar), 5.71 (dd,  $J_{2,3} = 3.3$  Hz, 1H, H-2<sup>C</sup>), 5.58 (dd,  $J_{3,4} = 10.4$  Hz, 1H, H-3<sup>C</sup>), 5.07 (s, 2H, H-1<sup>B</sup>, H-1<sup>C</sup>), 4.78 (d,  $J_{1,2} = 1.5$  Hz, 1H, H-1<sup>A</sup>), 4.65 (dd,  $J^2 = 12.0$  Hz, 4H, CH<sub>2</sub>Ph), 4.17 (dd,  $J_{2,3} = 2.5$  Hz, 1H, H-2<sup>B</sup>), 3.86-3.92 (m, 2H, H-3<sup>A</sup>, H-5<sup>C</sup>), 3.77 - 3.81 (dd,  $J_{3,4} = 10.0$  Hz, 1H, H-3<sup>B</sup>), 3.72 (dd,  $J_{4,5} = 10.1$  Hz, 1H, H-4<sup>C</sup>), 3.68 (s, 3H, -

OCH<sub>3</sub>), 3.66 (dd,  $J_{2,3} = 2.8$  Hz, 1H, H-2<sup>A</sup>), 3.55 - 3.64 (m, 4H, H-4<sup>A</sup>, H-4<sup>B</sup>, H-5<sup>B</sup>, -O-CH<sub>2a</sub>-), 3.46-3.54 (dq,  $J = 10.5, 6.0$  Hz, 1H, H-5<sup>A</sup>), 3.36 (dt,  $J = 9.7, 6.5$  Hz, 1H, -O-CH<sub>2b</sub>-), 2.33 (t,  $J = 7.5$  Hz, 2H, -CH<sub>2f</sub>-), 1.65 (quin,  $J = 7.6$  Hz, 2H, -CH<sub>2e</sub>-), 1.57 (quin,  $J = 7.1$  Hz, 2H, -CH<sub>2c</sub>-), 1.46 (d,  $J_{5,6} = 6.2$  Hz, 3H, H-6<sup>C</sup>). 1.35-1.39 (m, 2H, -CH<sub>2d</sub>-), 1.34 (d,  $J_{5,6} = 6.5$  Hz, 3H, H-6<sup>B</sup>), 1.32 ppm (d,  $J_{5,6} = 6.2$  Hz, 3H, H-6<sup>A</sup>); <sup>13</sup>C NMR (126 MHz, CDCl<sub>3</sub>):  $\delta$  174.0, 165.2, 164.9, 137.6, 137.4, 133.4, 133.2, 129.8, 129.7, 129.5, 129.3, 128.5 (x2), 128.4, 128.2, 127.9, 127.8, 127.7, 127.6, 101.0, 99.2, 97.0, 78.2, 77.8, 73.4, 72.6, 72.1, 70.9, 69.3, 68.2, 67.7, 67.3, 64.9, 63.7, 63.4, 51.5, 33.9, 29.0, 25.7, 24.6, 18.6 (x2), 18.5 ppm; HRMS (ESI):  $m/z$  calcd for C<sub>53</sub>H<sub>61</sub>N<sub>9</sub>O<sub>14</sub>Na [M+Na]<sup>+</sup>: 1070.4230, found: 1070.4209.

*NIS/AgOTf-promoted glycosylation.* A mixture the glycosyl donor **10** (0.184 g, 0.262 mmol), glycosyl acceptor **13** (0.097 g, 0.238 mmol), and freshly activated molecular sieves (3Å, 500 mg) in CH<sub>2</sub>Cl<sub>2</sub> (4 mL) was stirred under argon for 3 h. NIS (0.118 g, 0.524 mmol), followed by AgOTf (0.030 g, 0.119 mmol), was added and the reaction mixture was stirred for 1 h at 21 °C. After that, Et<sub>3</sub>N (1 mL) was added, the solid was filtered off and the residue was rinsed with CH<sub>2</sub>Cl<sub>2</sub> (3 x 20 mL). The combined filtrate was washed with 20% aq. Na<sub>2</sub>S<sub>2</sub>O<sub>3</sub> (30 mL) and water (3 x 20 mL), the organic phase was separated, dried over MgSO<sub>4</sub>, and concentrated *in vacuo*. The residue was purified by column chromatography on silica gel (ethyl acetate - toluene gradient elution) to afford the title compound **16** (0.180 g, 82%) as a white foam and the corresponding  $\beta$ -anomer (0.030 g, 12%). Analytical data for **16 $\beta$** :  $R_f = 0.30$  (ethyl acetate/toluene, 0.5/9.5, v/v);  $[\alpha]_D^{21} = -24.1$  ( $c = 1.4$ , CHCl<sub>3</sub>); <sup>1</sup>H NMR (600 MHz, CDCl<sub>3</sub>):  $\delta$  7.10-8.00 (m, 20H, H-Ar), 5.79 (dd,  $J_{2,3} = 3.3$  Hz, 1H, H-2<sup>C</sup>), 5.68 (dd,  $J_{3,4} = 10.2$  Hz, 1H, H-3<sup>C</sup>), 5.22 (d,  $J_{1,2} = 1.5$  Hz, 1H, H-1<sup>C</sup>), 4.78 (d,  $J_{1,2} = 1.8$  Hz, 1H, H-1<sup>A</sup>), 4.67 (dd,  $J^2 = 12.0$  Hz, 4H, CH<sub>2</sub>Ph), 4.40 (dq,  $J = 10.2, 6.0$  Hz, 1H, H-5<sup>C</sup>), 4.21 (s, 1H, H-1<sup>B</sup>), 3.97-4.00 (m, 2H, H-2<sup>B</sup>, H-3<sup>A</sup>), 3.71 (dd,  $J_{4,5} = 10.2$  Hz, 1H, H-4<sup>C</sup>), 3.67 (s, 3H, -OCH<sub>3</sub>), 3.59-3.63 (m, 2H, H-2<sup>A</sup>, H-5<sup>A</sup>), 3.58 (dd,  $J_{4,5} = 9.8$  Hz, 1H, H-4<sup>B</sup>), 3.52 (dt,  $J = 10.6, 6.6$  Hz, 1H, -O-CH<sub>2a</sub>-), 3.37 (dd,  $J_{4,5} = 9.6$  Hz, 1H, H-4<sup>A</sup>), 3.36 (dt,  $J = 9.6, 6.5$  Hz, 1H, -O-CH<sub>2b</sub>-), 3.25 (dd,  $J_{4,5} = 9.8$  Hz, 1H, H-3<sup>B</sup>), 3.08 (dq,  $J = 9.8, 6.1$  Hz, 1H, H-5<sup>B</sup>), 2.31 (t,  $J = 7.7$  Hz, 2H, -CH<sub>2f</sub>-), 1.64 (quin,  $J = 7.6$  Hz, 2H, -CH<sub>2e</sub>-), 1.53-1.58 (m, 2H, -CH<sub>2c</sub>-), 1.44 (d,  $J_{5,6} = 6.0$  Hz, 3H, H-6<sup>C</sup>), 1.42 (d,  $J_{5,6} = 6.3$  Hz, 3H, H-6<sup>B</sup>), 1.35 (d,  $J_{5,6} = 6.0$  Hz, 3H, H-6<sup>A</sup>), 1.30-1.35 ppm (m, 2H, -CH<sub>2d</sub>-); <sup>13</sup>C NMR (126 MHz, CDCl<sub>3</sub>):  $\delta$  174.0, 165.2, 164.9, 137.7, 137.1, 133.2, 133.0, 129.8, 129.7 (x2), 129.6, 128.5, 128.4 (x2), 128.3 (x2), 128.0, 127.9, 127.7, 98.5, 97.3, 96.4, 80.7, 75.5, 73.0, 72.7, 72.4, 72.3, 71.4, 71.2, 69.6, 67.5, 67.2, 67.1, 63.9, 63.6, 62.9, 51.5,

33.9, 29.0, 25.7, 24.7, 18.6, 18.4 (x2) ppm; HRMS (ESI):  $m/z$  calcd for  $C_{53}H_{61}N_9O_{14}Na$   $[M+Na]^+$ : 1070.4230, found: 1070.4233.

**5'-Methoxycarbonylpentyl 4-azido-3-*O*-benzoyl-2-*O*-benzyl-4,6-dideoxy- $\alpha$ -D-mannopyranosyl (1 $\rightarrow$ 2) 4-azido-3-*O*-benzyl-4,6-dideoxy- $\alpha$ -D-mannopyranoside (17).**

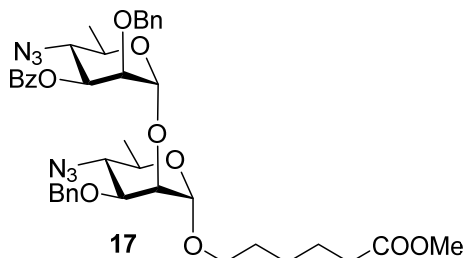

A mixture of glycosyl donor **8** (0.168 g, 0.318 mmol), glycosyl acceptor **14** (0.118 g, 0.289 mmol) and freshly activated molecular sieves (3 Å, 0.350 g) in PhMe (3 mL) was stirred under argon for 2 h at 21 °C. Then it was heated to 95 °C and TMSOTf (12 µL, 0.064 mmol) was added, stirred for additional 1 h. After that, Et<sub>3</sub>N (1 mL) was added, the solid was filtered off and the residue was rinsed with CH<sub>2</sub>Cl<sub>2</sub> (3 x 30 mL). The combined filtrate (100 mL) was washed with sat. aq. NaHCO<sub>3</sub> (50 mL), water (30 mL), and brine (30 mL). The organic phase was separated, dried over MgSO<sub>4</sub>, and concentrated *in vacuo*. The residue was purified by column chromatography on silica gel (ethyl acetate – toluene gradient elution) to afford the title compound (0.203 g, 91%) as a white foam. Analytical data for **17**:  $R_f$  = 0.40 (ethyl acetate/toluene, 0.5/9.5, v/v);  $[\alpha]_D^{21}$  = -4.4 ( $c$  = 1.2, CHCl<sub>3</sub>); <sup>1</sup>H NMR (500 MHz, CDCl<sub>3</sub>):  $\delta$  7.00-8.06 (m, 15H, H-Ar), 5.30 (dd,  $J_{3,4}$  = 9.9 Hz, 1H, H-3<sup>B</sup>), 5.07 (d,  $J_{1,2}$  = 1.7 Hz, 1H, H-1<sup>B</sup>), 4.70 (dd,  $J^2$  = 11.0 Hz, 2H, CH<sub>2</sub>Ph), 4.70 (d,  $J_{1,2}$  = 1.8 Hz, 1H, H-1<sup>A</sup>), 4.22 (dd,  $J^2$  = 12.1 Hz, 2H, CH<sub>2</sub>Ph), 3.98-4.03 (m, 2H, H-2<sup>A</sup>, H-2<sup>B</sup>), 3.70-3.82 (m, 3H, H-3<sup>A</sup>, H-5<sup>A</sup>, H-4<sup>B</sup>), 3.69 (s, 3H, -OCH<sub>3</sub>), 3.63 (dt,  $J$  = 9.7, 6.7 Hz, 1H, -O-CH<sub>2a</sub>-), 3.45-3.55 (m, 2H, H-4<sup>A</sup>, H-5<sup>B</sup>), 3.39 (dt,  $J$  = 9.7, 6.4 Hz, 1H, -O-CH<sub>2b</sub>-), 2.34 (t,  $J$  = 7.5 Hz, 2H, -CH<sub>2f</sub>-), 1.67 (quin,  $J$  = 7.6 Hz, 2H, -CH<sub>2c</sub>-), 1.56-1.63 (m, 2H, -CH<sub>2c</sub>-), 1.39 (d,  $J$  = 5.9 Hz, 3H, H-6<sup>A</sup>), 1.36-1.42 (m, 2H, -CH<sub>2d</sub>-), 1.34 ppm (d,  $J$  = 5.7 Hz, 3H, H-6<sup>B</sup>); <sup>13</sup>C NMR (126 MHz, CDCl<sub>3</sub>):  $\delta$  174.0, 165.4, 137.4, 137.3, 133.2, 129.8, 129.5, 128.5, 128.4, 128.2, 128.1, 127.8, 127.6, 99.1, 98.8, 78.6, 74.4, 73.3, 72.8, 72.6, 72.5, 67.6, 67.4, 67.3, 64.3, 63.1, 51.5, 33.9, 29.1, 25.7, 24.7, 18.5 (x2) ppm; HRMS (ESI):  $m/z$  calcd for  $C_{40}H_{48}N_6O_{10}Na$   $[M+Na]^+$ : 795.3324, found: 795.3314.

**5'-Methoxycarbonylpentyl 4-azido-2-*O*-benzyl-4,6-dideoxy- $\alpha$ -D-mannopyranosyl (1 $\rightarrow$ 2) 4-azido-3-*O*-benzyl-4,6-dideoxy- $\alpha$ -D-mannopyranoside (**18**).**

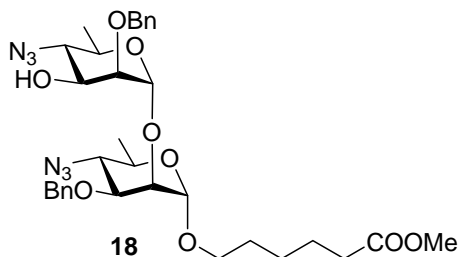

Sodium methoxide (~0.5 mL, 0.5 M solution) was added to a solution of **17** (0.910 g, 1.178 mmol) in CH<sub>3</sub>OH (20 mL) until pH ~9 and the resulting mixture was stirred under argon for 4 h at 21 °C. After that, the reaction mixture was neutralized with Amberlite IR 120 (H<sup>+</sup>) ion exchange resin, the resin was filtered off and rinsed successively with CH<sub>3</sub>OH. The combined filtrate was concentrated *in vacuo* and purified by column chromatography on silica gel (ethyl acetate – toluene gradient elution) to afford the title compound (0.755 g, 96%) as oil. Analytical data for **18**: *R*<sub>f</sub> = 0.50 (ethyl acetate/toluene, 1/9, v/v); [ $\alpha$ ]<sub>D</sub><sup>21</sup> = +43.2 (c = 1.2, CHCl<sub>3</sub>); <sup>1</sup>H NMR (500 MHz, CDCl<sub>3</sub>):  $\delta$  7.11-7.41 (m, 10H, H-Ar), 5.11(d, *J*<sub>1,2</sub> = 1.3 Hz, 1H, H-1<sup>B</sup>), 4.66 (dd, *J*<sup>2</sup> = 11.0 Hz, 2H, CH<sub>2</sub>Ph), 4.65 (d, *J*<sub>1,2</sub> = 2.0 Hz, 1H, H-1<sup>A</sup>), 4.18 (dd, *J*<sup>2</sup> = 11.7 Hz, 2H, CH<sub>2</sub>Ph), 3.99 (dd, *J*<sub>2,3</sub> = 3.0 Hz, 1H, H-2<sup>A</sup>), 3.83 (dd, *J*<sub>3,4</sub> = 10.5 Hz, 1H, H-3<sup>B</sup>), 3.76 (dd, *J*<sub>3,4</sub> = 9.8 Hz, 1H, H-3<sup>A</sup>), 3.68 (s, 3H, -OCH<sub>3</sub>), 3.67 (dd, *J*<sub>2,3</sub> = 3.5 Hz, 1H, H-2<sup>B</sup>), 3.61 (dq, *J* = 9.7, 6.7 Hz, 1H, H-5<sup>A</sup>), 3.56 (dq, *J* = 10.1, 6.2 Hz, 1H, H-5<sup>B</sup>), 3.47 (dt, *J* = 10.0, 6.1 Hz, 1H, -O-CH<sub>2a</sub>-), 3.37 (dd, *J*<sub>4,5</sub> = 10.0 Hz, 1H, H-4<sup>A</sup>), 3.36 (dt, *J* = 9.6, 6.5 Hz, 1H, -O-CH<sub>2b</sub>-), 3.23 (dd, *J*<sub>4,5</sub> = 10.0 Hz, 1H, H-4<sup>B</sup>), 2.33 (t, *J* = 7.4 Hz, 2H, -CH<sub>2f</sub>-), 2.29 (d, *J*<sub>3,-OH</sub> = 10.4 Hz, 1H, -OH<sup>B</sup>), 1.62-1.69 (m, 2H, -CH<sub>2e</sub>-), 1.55-1.62 (m, 2H, -CH<sub>2c</sub>-), 1.33-1.41 (m, 2H, -CH<sub>2d</sub>-), 1.30 (d, *J*<sub>5,6</sub> = 6.5 Hz, 3H, H-6<sup>A</sup>), 1.29 ppm (d, *J*<sub>5,6</sub> = 6.2 Hz, 3H, H-6<sup>B</sup>); <sup>13</sup>C NMR (126 MHz, CDCl<sub>3</sub>):  $\delta$  174.0, 137.3, 137.1, 128.6, 128.5, 128.2, 128.1, 128.0, 98.8, 97.9, 78.5, 76.5, 72.9, 72.6, 72.1, 69.8, 67.5, 67.2, 67.1, 66.4, 64.6, 51.5, 33.9, 29.0, 25.7, 24.7, 18.5, 18.4 ppm; HRMS (ESI): *m/z* calcd for C<sub>33</sub>H<sub>44</sub>N<sub>6</sub>O<sub>9</sub>Na [M+Na]<sup>+</sup>: 691.3062, found: 691.3054.

**5'-Methoxycarbonylpentyl 4-azido-2,3-di-*O*-benzoyl-4,6-dideoxy- $\alpha$ -D-mannopyranosyl (1 $\rightarrow$ 3) 4-azido-2-*O*-benzyl-4,6-dideoxy- $\alpha$ -D-mannopyranosyl (1 $\rightarrow$ 2) 4-azido-3-*O*-benzyl-4,6-dideoxy- $\alpha$ -D-mannopyranoside (19).**

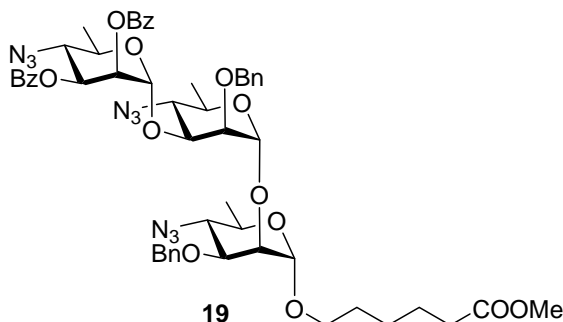

A mixture of glycosyl donor **7** (0.124 g, 0.230 mmol), glycosyl acceptor **18** (0.140 g, 0.210 mmol) and freshly activated molecular sieves (3 Å, 0.5 g) in CH<sub>2</sub>Cl<sub>2</sub> (4 mL) was stirred under argon for 5 h at 21 °C. TMSOTf (8 μL, 0.046 mmol) was added and the resulting mixture was stirred for additional 1 h. After that, Et<sub>3</sub>N (1 mL) was added, the solid was filtered off and the residue was rinsed with CH<sub>2</sub>Cl<sub>2</sub> (3 x 20 mL). The combined filtrate (80 mL) was washed with sat. aq. NaHCO<sub>3</sub> (50 mL), water (30 mL), and brine (20 mL). The organic phase was separated, dried over MgSO<sub>4</sub>, and concentrated *in vacuo*. The residue was purified by column chromatography on silica gel (ethyl acetate – toluene gradient elution) to afford the title compound (0.210 g, 96%) as a white foam. Analytical data for **19**: *R*<sub>f</sub> = 0.40 (ethyl acetate/toluene, 0.5/9.5, v/v); [α]<sub>D</sub><sup>21</sup> = -29.0 (c = 1.2, CHCl<sub>3</sub>); <sup>1</sup>H NMR (500 MHz, CDCl<sub>3</sub>): δ 7.22-8.07 (m, 20H, H-Ar), 5.70 (dd, *J*<sub>2,3</sub> = 3.4 Hz, 1H, H-2<sup>C</sup>), 5.59 (dd, *J*<sub>3,4</sub> = 9.8 Hz, 1H, H-3<sup>C</sup>), 5.26 (d, *J*<sub>1,2</sub> = 1.8 Hz, 1H, H-1<sup>C</sup>), 5.10 (d, *J*<sub>1,2</sub> = 1.6 Hz, 1H, H-1<sup>B</sup>), 4.67 (d, *J*<sub>1,2</sub> = 1.8 Hz, 1H, H-1<sup>A</sup>), 4.65 (dd, *J*<sup>2</sup> = 11.0 Hz, 2H, CH<sub>2</sub>Ph), 4.35 (dd, *J*<sup>2</sup> = 12.0 Hz, 2H, CH<sub>2</sub>Ph), 3.98 (dd, *J*<sub>2,3</sub> = 3.0 Hz, 1H, H-2<sup>A</sup>), 3.96 (dd, *J*<sub>3,4</sub> = 9.9 Hz, 1H, H-3<sup>B</sup>), 3.76 (dd, *J*<sub>3,4</sub> = 10.0 Hz, 1H, H-3<sup>A</sup>), 3.73 (dd, *J*<sub>4,5</sub> = 10.0 Hz, 1H, H-4<sup>C</sup>), 3.69-3.72 (m, 2H, H-2<sup>B</sup>, H-5<sup>C</sup>), 3.68 (s, 3H, -OCH<sub>3</sub>), 3.67 (dd, *J*<sub>4,5</sub> = 10.0 Hz, 1H, H-4<sup>B</sup>), 3.57-3.64 (m, 2H, H-5<sup>A</sup>, H-5<sup>B</sup>), 3.47 (dt, *J* = 10.0, 6.1 Hz, 1H, -O-CH<sub>2a</sub>-), 3.31-3.40 (m, 2H, H-4<sup>A</sup>, -O-CH<sub>2b</sub>-), 2.33 (t, *J* = 7.4 Hz, 2H, -CH<sub>2f</sub>-), 1.63-1.69 (m, 2H, -CH<sub>2e</sub>-), 1.55-1.61 (m, 2H, -CH<sub>2c</sub>-), 1.34-1.40 (m, 2H, -CH<sub>2d</sub>-), 1.35 (d, *J*<sub>5,6</sub> = 6.0 Hz, 3H, H-6<sup>C</sup>), 1.29 (d, *J*<sub>5,6</sub> = 6.0 Hz, 3H, H-6<sup>A</sup>), 1.28 ppm (d, *J*<sub>5,6</sub> = 6.0 Hz, 3H, H-6<sup>B</sup>); <sup>13</sup>C NMR (126 MHz, CDCl<sub>3</sub>): δ 174.0, 165.2, 165.0, 137.4, 137.3, 133.4, 133.2, 129.8 (x2), 129.4, 129.3, 128.6, 128.5 (x2), 128.3, 128.2, 128.1, 127.8, 127.6, 99.1, 98.8, 98.4, 78.4, 77.6, 76.1, 73.4, 72.4, 71.8, 70.7, 69.8, 68.2, 67.7, 67.5, 67.1, 64.7, 64.5, 63.3, 51.5, 33.9, 29.0, 25.7, 24.7, 18.6 (x2), 18.5 ppm; HRMS (ESI): *m/z* calcd for C<sub>53</sub>H<sub>61</sub>N<sub>9</sub>O<sub>14</sub>Na [M+Na]<sup>+</sup>: 1070.4230, found: 1070.4249.



**5'-Methoxycarbonylpentyl 4-azido-2,3-di-*O*-benzoyl-4,6-dideoxy- $\alpha$ -D-mannopyranosyl (1 $\rightarrow$ 2) 4-azido-3-*O*-benzyl-4,6-dideoxy- $\alpha$ -D-mannopyranosyl (1 $\rightarrow$ 3) 4-azido-2-*O*-benzyl-4,6-dideoxy- $\alpha$ -D-mannopyranosyl (1 $\rightarrow$ 2) 4-azido-3-*O*-benzyl-4,6-dideoxy- $\alpha$ -D-mannopyranoside (20).**

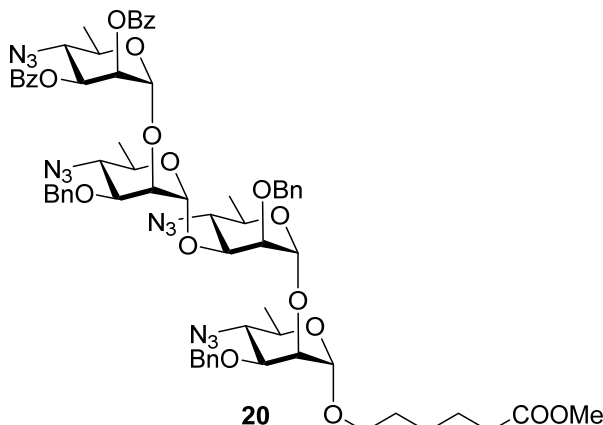

A mixture of glycosyl donor **10** (0.208 g, 0.296 mmol), glycosyl acceptor **18** (0.180 g, 0.269 mmol) and freshly activated molecular sieves (3 Å, 0.5 g) in CH<sub>2</sub>Cl<sub>2</sub> (4 mL) was stirred under argon for 4 h at 21 °C. MeOTf (213 μL, 1.88 mmol) was added and continued stirring for additional 48 h. After that, Et<sub>3</sub>N (1 mL) was added, the solid was filtered off and the residue was rinsed with CH<sub>2</sub>Cl<sub>2</sub> (3 x 20 mL). The combined filtrate (70 mL) was washed with sat. aq. NaHCO<sub>3</sub> (40 mL), water (30 mL), and brine (20 mL). The organic phase was separated, dried over MgSO<sub>4</sub>, and concentrated *in vacuo*. The residue was purified by column chromatography on silica gel (ethyl acetate – toluene gradient elution) to afford the title compound (0.321 g, 91%) as a white foam. Analytical data for **20**: R<sub>f</sub> = 0.30 (ethyl acetate/toluene, 0.5/9.5, v/v); [α]<sub>D</sub><sup>21</sup> = -17.9 (c = 1.0, CHCl<sub>3</sub>); <sup>1</sup>H NMR (600 MHz, CDCl<sub>3</sub>): δ 7.05-8.00 (m, 25H, H-Ar), 5.71 (dd, *J*<sub>2,3</sub> = 3.3 Hz, 1H, H-2<sup>D</sup>), 5.58 (dd, *J*<sub>3,4</sub> = 10.3 Hz, 1H, H-3<sup>D</sup>), 5.09 (d, *J*<sub>1,2</sub> = 1.5 Hz, 1H, H-1<sup>B</sup>), 5.07 (d, *J*<sub>1,2</sub> = 1.6 Hz, 1H, H-1<sup>C</sup>), 5.04 (d, *J*<sub>1,2</sub> = 1.6 Hz, 1H, H-1<sup>D</sup>), 4.69 (dd, *J*<sup>2</sup> = 12.0 Hz, 2H, CH<sub>2</sub>Ph), 4.68 (s, 1H, H-1<sup>A</sup>), 4.60 (dd, *J*<sup>2</sup> = 12.0 Hz, 2H, CH<sub>2</sub>Ph), 4.22 (dd, *J*<sup>2</sup> = 12.0 Hz, 2H, CH<sub>2</sub>Ph), 4.11 (dd, *J*<sub>2,3</sub> = 2.4 Hz, 1H, H-2<sup>C</sup>), 3.99 (dd, *J*<sub>2,3</sub> = 2.9 Hz, 1H, H-2<sup>A</sup>), 3.88-3.94 (m, 2H, H-3<sup>B</sup>, H-5<sup>D</sup>), 3.76 (dd, *J*<sub>3,4</sub> = 9.8 Hz, 1H, H-3<sup>A</sup>), 3.70-3.74 (m, 2H, H-3<sup>C</sup>, H-4<sup>D</sup>), 3.69 (s, 3H, -OCH<sub>3</sub>), 3.66 (dd, *J*<sub>2,3</sub> = 3.0 Hz, 1H, H-2<sup>B</sup>), 3.63 (dt, *J* = 9.6, 6.7 Hz, 1H, -O-CH<sub>2a</sub>-), 3.54-3.60 (m, 3H, H-4<sup>B</sup>, H-4<sup>C</sup>, H-5<sup>B</sup>), 3.42-3.52 (m, 2H, H-5<sup>A</sup>, H-5<sup>C</sup>), 3.33-3.41 (m, 2H, H-4<sup>A</sup>, -O-CH<sub>2b</sub>-), 2.34 (t, *J* = 7.5 Hz, 2H, -CH<sub>2f</sub>-), 1.67 (quin, *J* = 7.6 Hz, 2H, -CH<sub>2e</sub>-), 1.55-1.62 (m, 2H, -CH<sub>2c</sub>-), 1.46 (d, *J*<sub>5,6</sub> = 6.2 Hz, 3H, H-6<sup>D</sup>), 1.35-1.41 (m, 2H, -CH<sub>2d</sub>-), 1.31-1.35 (m, 6H, H-6<sup>A</sup>, H-6<sup>B</sup>), 1.26 ppm (d, *J*<sub>5,6</sub> = 6.2 Hz, 3H, H-6<sup>C</sup>);

$^{13}\text{C}$  NMR (126 MHz,  $\text{CDCl}_3$ ):  $\delta$  174.0, 165.2, 164.8, 137.5, 137.4, 137.3, 133.3, 133.2, 129.8, 129.7, 129.5, 129.3, 128.5 (x2), 128.4, 128.3, 128.2, 128.0, 127.8 (x2), 127.7, 127.6, 100.8, 99.2, 98.8, 98.3, 78.4, 77.9, 77.4, 76.4, 73.7, 73.2, 72.5, 72.1, 71.9, 70.9, 69.3, 68.1, 67.9, 67.7, 67.5, 67.2, 64.6, 63.6, 63.4, 51.5, 33.9, 29.1, 25.7, 24.7, 18.6 (x2), 18.5 ppm; HRMS (ESI):  $m/z$  calcd for  $\text{C}_{66}\text{H}_{76}\text{N}_{12}\text{O}_{17}\text{Na}$   $[\text{M}+\text{Na}]^+$ : 1331.5344, found: 1331.5341.

**5'-Methoxycarbonylpentyl 4-azido-2-O-benzoyl-3-O-benzyl-4,6-dideoxy- $\alpha$ -D-mannopyranosyl (1 $\rightarrow$ 2) 4-azido-3-O-benzyl-4,6-dideoxy- $\alpha$ -D-mannopyranosyl (1 $\rightarrow$ 2) 4-azido-3-O-benzyl-4,6-dideoxy- $\alpha$ -D-mannopyranoside (21).**

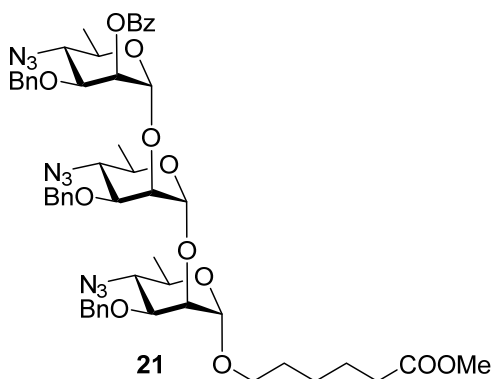

A mixture of glycosyl donor **11** (0.743 g, 1.08 mmol), glycosyl acceptor **14** (0.400 g, 0.982 mmol) and freshly activated molecular sieves (3 Å, 1.5 g) in  $\text{CH}_2\text{Cl}_2$  (10 mL) was stirred under argon for 4 h at 21 °C. MeOTf (0.890 mL, 7.86 mmol) was added and continued stirring for additional 48 h. After that,  $\text{Et}_3\text{N}$  (1 mL) was added, the solid was filtered off and the residue was rinsed with  $\text{CH}_2\text{Cl}_2$  (3 x 30 mL). The combined filtrate (100 mL) was washed with sat. aq.  $\text{NaHCO}_3$  (40 mL), water (30 mL), and brine (20 mL). The organic phase was separated, dried over  $\text{MgSO}_4$ , and concentrated *in vacuo*. The residue was purified by column chromatography on silica gel (ethyl acetate – toluene gradient elution) to afford the title compound (0.865 g, 85%) as oil. Analytical data for **21**:  $R_f$  = 0.50 (ethyl acetate/toluene, 0.5/9.5, v/v);  $[\alpha]_D^{21}$  = +36.7 ( $c$  = 1.3,  $\text{CHCl}_3$ );  $^1\text{H}$  NMR (500 MHz,  $\text{CDCl}_3$ ):  $\delta$  7.15–8.11 (m, 20H, H-Ar), 5.61 (dd,  $J_{2,3}$  = 3.0 Hz, 1H, H-2<sup>C</sup>), 4.99 (d,  $J_{1,2}$  = 1.8 Hz, 1H, H-1<sup>B</sup>), 4.90 (d,  $J_{1,2}$  = 2.0 Hz, 1H, H-1<sup>C</sup>), 4.72 (dd,  $J^2$  = 12.0 Hz, 2H,  $\text{CH}_2\text{Ph}$ ), 4.64 (s, 1H, H-1<sup>A</sup>), 4.57–4.74 (m, 4H, 2 x  $\text{CH}_2\text{Ph}$ ), 3.87–3.90 (m, 2H, H-2<sup>B</sup>, H-3<sup>C</sup>), 3.83 (dd,  $J_{2,3}$  = 2.5 Hz, 1H, H-2<sup>A</sup>), 3.75 (dd,  $J_{3,4}$  = 9.9 Hz, 1H, H-3<sup>B</sup>), 3.71 (dd,  $J_{3,4}$  = 10.0 Hz, 1H, H-3<sup>A</sup>), 3.70 (s, 3H, - $\text{OCH}_3$ ), 3.52–3.64 (m, 3H, H-5<sup>B</sup>, H-5<sup>C</sup>, - $\text{O-CH}_{2a}$ ), 3.48 (dd,  $J_{4,5}$  = 10.0 Hz, 1H, H-4<sup>C</sup>), 3.41–3.46 (m, 1H, H-5<sup>A</sup>), 3.37 (dd,  $J_{4,5}$  = 10.0 Hz, 1H, H-4<sup>B</sup>), 3.33–3.38 (m, 1H, - $\text{O-CH}_{2b}$ ), 3.23 (dd,  $J_{4,5}$  = 10.0 Hz, 1H, H-4<sup>A</sup>), 2.34 (t,  $J$  = 7.5 Hz, 2H, - $\text{CH}_{2f}$ ), 1.63–1.70 (m, 2H, - $\text{CH}_{2e}$ ),

1.54-1.61 (m, 2H,  $-CH_{2c}$ ), 1.32-1.40 (m, 2H,  $-CH_{2d}$ ), 1.30 (d,  $J_{5,6} = 6.0$  Hz, 6H, H-6<sup>B</sup>, H-6<sup>C</sup>), 1.25 ppm (d,  $J_{5,6} = 6.0$  Hz, 3H, H-6<sup>A</sup>); <sup>13</sup>C NMR (126 MHz, CDCl<sub>3</sub>): δ 174.0, 165.3, 137.4, 137.3, 137.2, 133.3, 129.9, 129.8, 128.5 (x3), 128.4, 128.3, 128.1, 128.0 (x2), 127.9, 100.4, 99.2, 98.7, 77.6, 76.7, 75.4, 74.2, 74.1, 72.2, 72.1, 71.4, 67.7 (x2), 67.5, 67.1, 64.4, 64.1 (x2), 51.5, 33.9, 29.1, 25.7, 24.7, 18.7, 18.6 ppm; HRMS (ESI):  $m/z$  calcd for C<sub>53</sub>H<sub>63</sub>N<sub>9</sub>O<sub>13</sub>Na [M+Na]<sup>+</sup>: 1056.4438, found: 1056.4436.

**5'-Methoxycarbonylpentyl 4-azido-3-*O*-benzyl-4,6-dideoxy-α-D-mannopyranosyl (1→2) 4-azido-3-*O*-benzyl-4,6-dideoxy-α-D-mannopyranosyl (1→2) 4-azido-3-*O*-benzyl-4,6-dideoxy-α-D-mannopyranoside (22).**

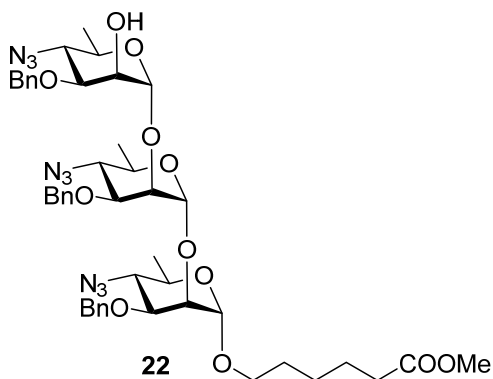

Sodium methoxide (0.7 mL, 0.5 M solution) was added to a solution of **21** (0.855 g, 0.827 mmol) in CH<sub>3</sub>OH (10 mL) until pH ~9 and the resulting mixture was stirred under argon for 4 h at 21 °C. After that, the reaction mixture was neutralized with Amberlite IR 120 (H<sup>+</sup>) ion exchange resin, the resin was filtered off and rinsed successively with CH<sub>3</sub>OH. The combined filtrate was concentrated *in vacuo* and purified by column chromatography on silica gel (ethyl acetate – toluene gradient elution) to afford the title compound (0.720 g, 94%) as oil. Analytical data for **22**:  $R_f = 0.30$  (ethyl acetate/toluene, 0.5/9.5, v/v);  $[\alpha]_D^{21} = +94.4$  (c = 1.1, CHCl<sub>3</sub>); <sup>1</sup>H NMR (500 MHz, CDCl<sub>3</sub>): δ 7.29-7.45 (m, 15H, H-Ar), 4.95 (br. s., 2H, H-1<sup>B</sup>, H-1<sup>C</sup>), 4.63 (d,  $J_{1,2} = 2.0$  Hz, 1H, H-1<sup>A</sup>), 4.58-4.73 (m, 6H, 3 x CH<sub>2</sub>Ph), 4.01 (dd,  $J_{2,3} = 3.2$  Hz, 1H, H-2<sup>C</sup>), 3.95 (dd,  $J_{2,3} = 2.4$  Hz, 1H, H-2<sup>B</sup>), 3.82 (dd,  $J_{2,3} = 2.5$  Hz, 1H, H-2<sup>A</sup>), 3.71-3.76 (m, 6H, H-3<sup>A</sup> H-3<sup>B</sup> H-3<sup>C</sup>), 3.70 (s, 3H,  $-OCH_3$ ), 3.50-3.63 (m, 3H, H-5<sup>B</sup>, H-5<sup>C</sup>,  $-O-CH_{2a-}$ ), 3.39-3.47 (m, 1H, H-5<sup>A</sup>), 3.42 (dd,  $J_{4,5} = 10.0$  Hz, 1H, H-4<sup>C</sup>), 3.31-3.39 (m, 2H, H-4<sup>B</sup>,  $-O-CH_{2b-}$ ), 3.23 (dd,  $J_{4,5} = 9.9$  Hz, 1H, H-4<sup>A</sup>), 2.34 (t,  $J = 7.5$  Hz, 2H,  $-CH_{2f-}$ ), 2.30 (br. s., 1H,  $-OH^C$ ), 1.63-1.70 (m, 2H,  $-CH_{2e-}$ ), 1.52-1.60 (m, 2H,  $-CH_{2c-}$ ), 1.32-1.41 (m, 2H,  $-CH_{2d-}$ ), 1.28-1.31 (m, 6H, H-6<sup>B</sup>, H-6<sup>C</sup>), 1.21 ppm (d,  $J_{5,6} = 6.2$  Hz, 3H, H-6<sup>A</sup>); <sup>13</sup>C NMR (126 MHz,



H-5<sup>C</sup>), 3.35 (dd,  $J_{4,5} = 10.0$  Hz, 1H, H-4<sup>D</sup>), 3.30-3.34 (m, 1H, -O-CH<sub>2b</sub>-), 3.16-3.24 (m, 3H, H-4<sup>A</sup>, H-4<sup>B</sup>, H-4<sup>C</sup>), 2.32 (t,  $J = 7.4$  Hz, 2H, -CH<sub>2f</sub>-), 1.61-1.67 (m, 2H, -CH<sub>2e</sub>-), 1.50-1.59 (m, 2H, -CH<sub>2c</sub>-), 1.29-1.37 (m, 2H, -CH<sub>2d</sub>-), 1.23-1.29 (m, 9H, H-6<sup>B</sup>, H-6<sup>C</sup>, H-6<sup>D</sup>), 1.19 (d,  $J_{5,6} = 6.2$  Hz, 3H, H-6<sup>E</sup>), 1.15 ppm (d,  $J_{5,6} = 6.2$  Hz, 3H, H-6<sup>A</sup>); <sup>13</sup>C NMR (126 MHz, CDCl<sub>3</sub>): δ 173.9, 165.3, 137.4, 137.3, 137.1 (x2), 133.3, 129.9, 129.8, 128.7, 128.6 (x3), 128.5 (x2), 128.4 (x2), 128.3 (x3), 128.2 (x2), 128.1 (x3), 127.9 (x2), 100.4, 100.2, 100.1, 99.2, 98.6, 77.4, 76.6, 75.3, 74.1, 74.0, 73.6, 72.2 (x2), 72.1 (x2), 71.3, 67.8 (x2), 67.7 (x2), 67.5, 67.1, 64.4, 64.3, 64.2, 64.1 (x2), 51.5, 33.9, 29.0, 25.7, 24.7, 18.6, 18.5 (x2) ppm; HRMS (ESI):  $m/z$  calcd for C<sub>79</sub>H<sub>93</sub>N<sub>15</sub>O<sub>19</sub>Na [M+Na]<sup>+</sup>: 1578.6664, found: 1578.6667.

**5'-Methoxycarbonylpentyl 4-azido-3-*O*-benzyl-4,6-dideoxy-α-D-mannopyranosyl (1→2) 4-azido-3-*O*-benzyl-4,6-dideoxy-α-D-mannopyranosyl (1→2) 4-azido-3-*O*-benzyl-4,6-dideoxy-α-D-mannopyranosyl (1→2) 4-azido-3-*O*-benzyl-4,6-dideoxy-α-D-mannopyranosyl (1→2) 4-azido-3-*O*-benzyl-4,6-dideoxy-α-D-mannopyranoside (24).**

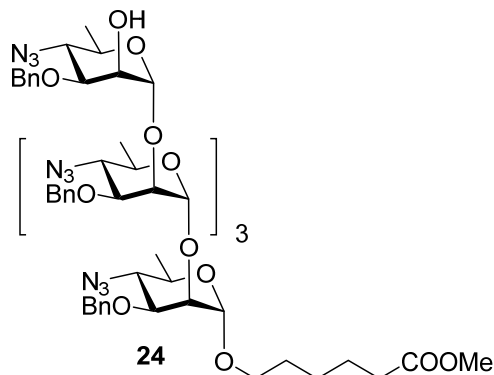

Sodium methoxide (0.8 mL, 0.5 M solution) was added to a solution of **23** (0.450 g, 0.289 mmol) in CH<sub>3</sub>OH (10 mL) until pH ~9 and the resulting mixture was stirred under argon for 4 h at 21 °C. After that, the reaction mixture was neutralized with Amberlite IR 120 (H<sup>+</sup>) ion exchange resin, the resin was filtered off and rinsed successively with CH<sub>3</sub>OH. The combined filtrate was concentrated *in vacuo* and purified by column chromatography on silica gel (ethyl acetate – toluene gradient elution) to afford the title compound (0.395 g, 94%) as oil. Analytical data for **24**:  $R_f = 0.40$  (ethyl acetate/toluene, 1/9, v/v);  $[\alpha]_D^{21} = +81.2$  ( $c = 1.0$ , CHCl<sub>3</sub>); <sup>1</sup>H NMR (600 MHz, CDCl<sub>3</sub>): δ 7.28-7.41 (m, 25H, H-Ar), 4.97 (d,  $J_{1,2} = 1.1$  Hz, 1H, H-1<sup>E</sup>), 4.96 (d,  $J_{1,2} = 1.5$  Hz, 1H, H-1<sup>D</sup>), 4.87 (d,  $J_{1,2} = 1.3$  Hz, 1H, H-1<sup>C</sup>), 4.85 (d,  $J_{1,2} = 1.3$  Hz, 1H, H-1<sup>B</sup>), 4.58-4.76 (m, 11H, H-1<sup>A</sup>, 5 x CH<sub>2</sub>Ph), 4.00 (dd,  $J_{2,3} = 3.5$  Hz, 1H, H-2<sup>E</sup>), 3.93 (dd,  $J_{2,3} = 2.5$  Hz, 1H, H-2<sup>D</sup>), 3.83 (dd,  $J_{2,3} = 2.5$  Hz, 1H, H-2<sup>C</sup>), 3.80 (dd,  $J_{2,3} = 2.5$  Hz, 1H, H-2<sup>B</sup>), 3.76 (dd,  $J_{2,3} = 2.0$  Hz, 1H, H-2<sup>A</sup>), 3.63-3.73 (m, 8H, H-3<sup>A</sup>, H-3<sup>B</sup>, H-3<sup>C</sup>, H-3<sup>D</sup>, H-3<sup>E</sup>, -

OCH<sub>3</sub>), 3.51-3.59 (m, 2H, H-5<sup>D</sup>, -O-CH<sub>2a</sub>-), 3.37-3.51 (m, 5H, H-5<sup>A</sup>, H-5<sup>B</sup>, H-5<sup>C</sup>, H-5<sup>E</sup>, H-4<sup>E</sup>), 3.29-3.34 (m, 2H, H-4<sup>D</sup>, -O-CH<sub>2b</sub>-), 3.16-3.24 (m, 3H, H-4<sup>A</sup>, H-4<sup>B</sup>, H-4<sup>C</sup>), 2.32 (t, *J* = 7.4 Hz, 2H, -CH<sub>2f</sub>-), 2.28 (d, *J*<sub>2,-OH</sub> = 1.8 Hz, 1H, -OH<sup>E</sup>), 1.60-1.67 (m, 2H, -CH<sub>2e</sub>-), 1.51-1.58 (m, 2H, -CH<sub>2c</sub>-), 1.30-1.38 (m, 2H, -CH<sub>2d</sub>-), 1.14-1.26 ppm (m, 15H, H-6<sup>A</sup>, H-6<sup>B</sup>, H-6<sup>C</sup>, H-6<sup>D</sup>, H-6<sup>E</sup>); <sup>13</sup>C NMR (126 MHz, CDCl<sub>3</sub>): δ 174.0, 137.3 (x2), 137.2, 137.1 (x2), 128.6 (x4), 128.4 (x2), 128.3 (x3), 128.2 (x2), 128.1 (x2), 100.5, 100.4, 100.2 (x2), 98.6, 77.7, 77.4, 76.6, 76.5, 74.0, 73.6, 73.5, 73.3, 72.2 (x2), 72.1 (x2), 67.8, 67.7, 67.5, 67.3, 67.1 (x2), 64.4, 64.2, 63.8, 51.5, 33.9, 29.0, 25.7, 24.7, 18.6 (x2), 18.5 (x2), 18.3 ppm; HRMS (ESI): *m/z* calcd for C<sub>72</sub>H<sub>89</sub>N<sub>15</sub>O<sub>18</sub>Na [M+Na]<sup>+</sup>: 1474.6402, found: 1474.6406.

**5'-Methoxycarbonylpentyl 4-azido-2,3-di-*O*-benzoyl-4,6-dideoxy-α-D-mannopyranosyl (1→2) 4-azido-3-*O*-benzyl-4,6-dideoxy-α-D-mannopyranosyl (1→2) 4-azido-3-*O*-benzyl-4,6-dideoxy-α-D-mannopyranosyl (1→2) 4-azido-3-*O*-benzyl-4,6-dideoxy-α-D-mannopyranosyl (1→2) 4-azido-3-*O*-benzyl-4,6-dideoxy-α-D-mannopyranosyl (1→2) 4-azido-3-*O*-benzyl-4,6-dideoxy-α-D-mannopyranoside (25).**

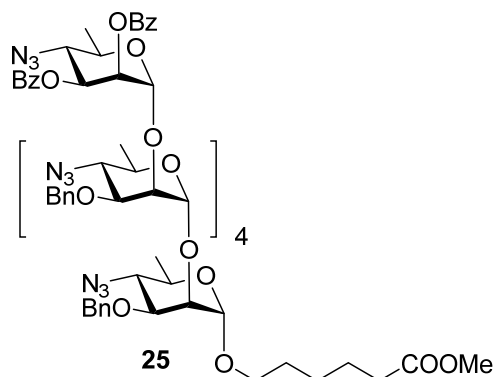

A mixture of glycosyl donor **7** (0.158 g, 0.292 mmol), glycosyl acceptor **24** (0.386 g, 0.266 mmol) and freshly activated molecular sieves (3 Å, 0.5 g) in CH<sub>2</sub>Cl<sub>2</sub> (5 mL) was stirred under argon for 5 h at 21 °C. TMSOTf (11 μL, 0.058 mmol) was added and the resulting mixture was stirred for additional 1 h. After that, Et<sub>3</sub>N (1 mL) was added, the solid was filtered off and the residue was rinsed with CH<sub>2</sub>Cl<sub>2</sub> (3 x 20 mL). The combined filtrate (80 mL) was washed with sat. aq. NaHCO<sub>3</sub> (50 mL), water (30 mL), and brine (20 mL). The organic phase was separated, dried over MgSO<sub>4</sub>, and concentrated *in vacuo*. The residue was purified by column chromatography on silica gel (ethyl acetate – toluene gradient elution) to afford the title compound (0.487 g, 90%) as a white foam. Analytical data for **25**: *R*<sub>f</sub> = 0.70 (ethyl acetate/toluene, 1/9, v/v); [α]<sub>D</sub><sup>21</sup> = +31.7 (*c* = 1.4, CHCl<sub>3</sub>); <sup>1</sup>H NMR (600 MHz, CDCl<sub>3</sub>): δ

7.13-8.03 (m, 35H, H-Ar), 5.70 (dd,  $J_{2,3} = 3.3$  Hz, 1H, H-2<sup>F</sup>), 5.59 (dd,  $J_{3,4} = 10.2$  Hz, 1H, H-3<sup>F</sup>), 5.02-5.03 (m, 2H, H-1<sup>E</sup>, H-1<sup>F</sup>), 4.90 (dd,  $J_{1,2} = 1.8$  Hz, 1H, H-1<sup>D</sup>), 4.88 (dd,  $J_{1,2} = 1.8$  Hz, 1H, H-1<sup>C</sup>), 4.86 (dd,  $J_{1,2} = 1.8$  Hz, 1H, H-1<sup>B</sup>), 4.61-4.76 (m, 10H, 5 x CH<sub>2</sub>Ph), 4.60 (dd,  $J_{1,2} = 1.8$  Hz, 1H, H-1<sup>A</sup>), 3.94 (dd,  $J_{2,3} = 2.4$  Hz, 1H, H-2<sup>E</sup>), 3.91 (dd,  $J_{2,3} = 2.4$  Hz, 1H, H-2<sup>D</sup>), 3.83 (dd,  $J_{2,3} = 2.4$  Hz, 1H, H-2<sup>C</sup>), 3.81 (dd,  $J_{2,3} = 2.4$  Hz, 1H, H-2<sup>B</sup>), 3.77-3.80 (m, 1H, H-5<sup>F</sup>), 3.77 (dd,  $J_{2,3} = 2.4$  Hz, 1H, H-2<sup>A</sup>), 3.74 (dd,  $J_{3,4} = 10.2$  Hz, 1H, H-3<sup>E</sup>), 3.65-3.71 (m, 8H, H-3<sup>A</sup>, H-3<sup>B</sup>, H-3<sup>C</sup>, H-3<sup>D</sup>, H-4<sup>F</sup>, -OCH<sub>3</sub>), 3.55-3.59 (m, 2H, H-4<sup>E</sup>, -O-CH<sub>2a</sub>-), 3.38-3.53 (m, 5H, H-5<sup>A</sup>, H-5<sup>B</sup>, H-5<sup>C</sup>, H-5<sup>D</sup>, H-5<sup>E</sup>), 3.32 (dt,  $J = 9.6, 6.4$  Hz, 1H, -O-CH<sub>2b</sub>-), 3.16-3.27 (m, 4H, H-4<sup>A</sup>, H-4<sup>B</sup>, H-4<sup>C</sup>, H-4<sup>D</sup>), 2.32 (t,  $J = 7.8$  Hz, 2H, -CH<sub>2f</sub>-), 1.62-1.67 (m, 2H, -CH<sub>2e</sub>-), 1.52-1.58 (m, 2H, -CH<sub>2c</sub>-), 1.32-1.36 (m, 2H, -CH<sub>2d</sub>-), 1.14-1.31 ppm (m, 18H, H-6<sup>A</sup>, H-6<sup>B</sup>, H-6<sup>C</sup>, H-6<sup>D</sup>, H-6<sup>E</sup>, H-6<sup>F</sup>); <sup>13</sup>C NMR (126 MHz, CDCl<sub>3</sub>): δ 174.0, 165.2, 164.9, 137.4, 137.3, 137.1 (x3), 133.4, 133.2, 129.8, 129.7, 129.5, 129.3, 129.0, 128.7, 128.6 (x3), 128.5 (x2), 128.4 (x3), 128.3 (x2), 128.2, 128.1 (x2), 127.9 (x3), 100.4, 100.3, 100.1, 100.0, 98.9, 98.6, 77.4, 77.1, 76.6, 76.5, 74.0, 73.8, 73.6, 73.5, 73.0, 72.3 (x2), 72.2 (x2), 72.1, 70.9, 69.4, 68.1, 67.9, 67.8 (x2), 67.6, 67.5, 67.1, 64.4, 64.3, 64.2 (x2), 63.9, 63.4, 51.5, 33.9, 29.0, 25.7, 24.7, 18.6 (x2), 18.5 (x2), 18.4 ppm; HRMS (ESI):  $m/z$  calcd for C<sub>92</sub>H<sub>106</sub>N<sub>18</sub>O<sub>23</sub>Na [M+Na]<sup>+</sup>: 1853.7570, found: 1853.7550.

**5'-Methoxycarbonylpentyl 4-azido-3-*O*-benzoyl-2-*O*-benzyl-4,6-dideoxy- $\alpha$ -D-mannopyranosyl (1 $\rightarrow$ 2) 4-azido-3-*O*-benzyl-4,6-dideoxy- $\alpha$ -D-mannopyranosyl (1 $\rightarrow$ 2) 4-azido-3-*O*-benzyl-4,6-dideoxy- $\alpha$ -D-mannopyranosyl (1 $\rightarrow$ 2) 4-azido-3-*O*-benzyl-4,6-dideoxy- $\alpha$ -D-mannopyranoside (26).**

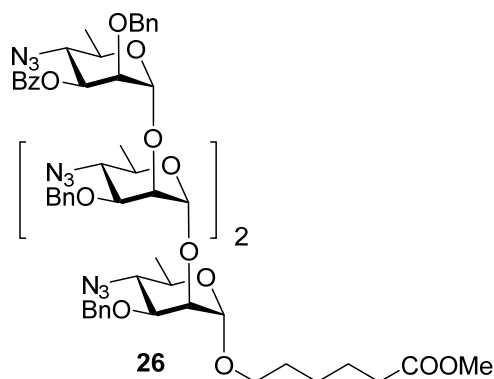

A mixture of glycosyl donor **8** (0.228 g, 0.433 mmol), glycosyl acceptor **22** (0.366 g, 0.394 mmol) and freshly activated molecular sieves (3 Å, 0.500 g) in PhMe (10 mL) was stirred under argon for 2 h at 21 °C. Then it was heated to 95 °C and TMSOTf (16 μL, 0.087 mmol) was added, stirred for additional 1 h. After that, Et<sub>3</sub>N (1 mL) was added, the solid was

filtered off and the residue was rinsed with  $\text{CH}_2\text{Cl}_2$  (3 x 30 mL). The combined filtrate (100 mL) was washed with sat. aq.  $\text{NaHCO}_3$  (50 mL), water (30 mL), and brine (30 mL). The organic phase was separated, dried over  $\text{MgSO}_4$ , and concentrated *in vacuo*. The residue was purified by column chromatography on silica gel (ethyl acetate – toluene gradient elution) to afford the title compound (0.444 g, 87%) as a white foam. Analytical data for **26**:  $R_f$  = 0.50 (ethyl acetate/toluene, 0.5/9.5, v/v);  $[\alpha]_D^{21}$  = +42.1 (c = 1.0,  $\text{CHCl}_3$ );  $^1\text{H}$  NMR (600 MHz,  $\text{CDCl}_3$ ):  $\delta$  7.03-8.05 (m, 25H, H-Ar), 5.29 (dd,  $J_{3,4}$  = 10.3 Hz, 1H, H-3<sup>D</sup>), 5.07 (d,  $J_{1,2}$  = 1.6 Hz, 1H, H-1<sup>D</sup>), 4.96 (d,  $J_{1,2}$  = 1.8 Hz, 1H, H-1<sup>C</sup>), 4.91 (d,  $J_{1,2}$  = 1.8 Hz, 1H, H-1<sup>B</sup>), 4.60-4.73 (m, 7H, H-1<sup>A</sup>, 3 x  $\text{CH}_2\text{Ph}$ ), 4.21 (dd,  $J^2$  = 12.0 Hz, 2H,  $\text{CH}_2\text{Ph}$ ), 4.05 (dd,  $J_{2,3}$  = 2.5 Hz, 1H, H-2<sup>C</sup>), 4.00 (dd,  $J_{2,3}$  = 3.3 Hz, 1H, H-2<sup>D</sup>), 3.90 (dd,  $J_{2,3}$  = 2.4 Hz, 1H, H-2<sup>B</sup>), 3.80 (dd,  $J_{2,3}$  = 2.4 Hz, 1H, H-2<sup>A</sup>), 3.76 (dd,  $J_{4,5}$  = 10.2 Hz, 1H, H-4<sup>D</sup>), 3.68-3.73 (m, 6H, H-3<sup>A</sup>, H-3<sup>B</sup>, H-3<sup>C</sup>, - $\text{OCH}_3$ ), 3.56-3.63 (m, 2H, H-5<sup>D</sup>, - $\text{O-CH}_{2a}$ ), 3.39-3.54 (m, 4H, H-4<sup>C</sup>, H-5<sup>A</sup>, H-5<sup>B</sup>, H-5<sup>C</sup>), 3.31-3.35 (m, 2H, H-4<sup>B</sup>, - $\text{O-CH}_{2b}$ ), 3.21 (dd,  $J_{4,5}$  = 10.0 Hz, 1H, H-4<sup>A</sup>), 2.32 (t,  $J$  = 7.5 Hz, 2H, - $\text{CH}_{2f}$ ), 1.62-1.67 (m, 2H, - $\text{CH}_{2e}$ ), 1.53-1.58 (m, 2H, - $\text{CH}_{2c}$ ), 1.31-1.36 (m, 2H, - $\text{CH}_{2d}$ ), 1.22-1.29 ppm (m, 12H, H-6<sup>A</sup>, H-6<sup>B</sup>, H-6<sup>C</sup>, H-6<sup>D</sup>);  $^{13}\text{C}$  NMR (126 MHz,  $\text{CDCl}_3$ ):  $\delta$  174.0, 165.4, 137.4, 137.3 (x2), 137.1, 133.3, 129.8, 129.5, 128.7, 128.6 (x2), 128.4, 128.3 (x2), 128.2 (x2), 128.1, 127.8, 127.6, 100.6, 100.1, 98.8, 98.6, 77.9, 77.4, 76.9, 74.4, 74.2, 72.9, 72.8, 72.7, 72.6, 72.5, 72.3, 72.2, 68.1, 67.8, 67.7, 67.5, 67.1, 64.4, 64.2, 64.1, 63.1, 51.5, 33.9, 29.0, 25.7, 24.6, 18.6 (x2), 18.4, 18.3 ppm; HRMS (ESI):  $m/z$  calcd for  $\text{C}_{66}\text{H}_{78}\text{N}_{12}\text{O}_{16}\text{Na}$   $[\text{M}+\text{Na}]^+$ : 1317.5551, found: 1317.5549.

**5'-Methoxycarbonylpentyl 4-azido-2-O-benzyl-4,6-dideoxy- $\alpha$ -D-mannopyranosyl (1 $\rightarrow$ 2) 4-azido-3-O-benzyl-4,6-dideoxy- $\alpha$ -D-mannopyranosyl (1 $\rightarrow$ 2) 4-azido-3-O-benzyl-4,6-dideoxy- $\alpha$ -D-mannopyranosyl (1 $\rightarrow$ 2) 4-azido-3-O-benzyl-4,6-dideoxy- $\alpha$ -D-mannopyranoside (27).**

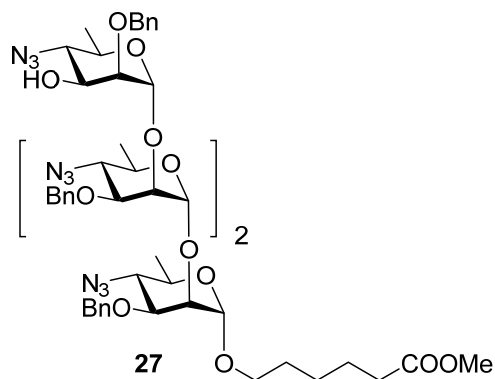



Sodium methoxide (0.8 mL, 0.5 M solution) was added to a solution of **26** (0.434 g, 0.335 mmol) in CH<sub>3</sub>OH (10 mL) until pH ~9 and the resulting mixture was stirred under argon for 4 h at 21 °C. After that, the reaction mixture was neutralized with Amberlite IR 120 (H<sup>+</sup>) ion exchange resin; the resin was filtered off and rinsed successively with CH<sub>3</sub>OH. The combined filtrate was concentrated *in vacuo* and purified by column chromatography on silica gel (ethyl acetate – toluene gradient elution) to afford the title compound (0.356 g, 89%) as a white foam. Analytical data for **27**: *R<sub>f</sub>* = 0.50 (ethyl acetate/toluene, 1/9, v/v); [ $\alpha$ ]<sub>D</sub><sup>21</sup> = +65.6 (c = 1.3, CHCl<sub>3</sub>); <sup>1</sup>H NMR (500 MHz, CDCl<sub>3</sub>):  $\delta$  7.13-7.42 (m, 20H, H-Ar), 5.10 (d, *J*<sub>1,2</sub> = 0.9 Hz, 1H, H-1<sup>D</sup>), 4.93 (d, *J*<sub>1,2</sub> = 1.7 Hz, 1H, H-1<sup>C</sup>), 4.90 (d, *J*<sub>1,2</sub> = 1.8 Hz, 1H, H-1<sup>B</sup>), 4.59-4.75 (m, 7H, H-1<sup>A</sup>, 3 x CH<sub>2</sub>Ph), 4.23 (dd, *J*<sup>2</sup> = 11.5 Hz, 2H, CH<sub>2</sub>Ph), 4.04 (dd, *J*<sub>2,3</sub> = 2.5 Hz, 1H, H-2<sup>C</sup>), 3.88 (dd, *J*<sub>2,3</sub> = 2.4 Hz, 1H, H-2<sup>B</sup>), 3.83 (dd, *J*<sub>3,4</sub> = 10.0 Hz, 1H, H-3<sup>D</sup>), 3.79 (dd, *J*<sub>2,3</sub> = 2.5 Hz, 1H, H-2<sup>A</sup>), 3.72 (dd, *J*<sub>2,3</sub> = 2.5 Hz, 1H, H-2<sup>D</sup>), 3.65-3.70 (m, 6H, H-3<sup>A</sup>, H-3<sup>B</sup>, H-3<sup>C</sup>, -OCH<sub>3</sub>), 3.49-3.61 (m, 2H, H-5<sup>C</sup>, -O-CH<sub>2a</sub>-), 3.43 (m, 3H, H-5<sup>A</sup>, H-5<sup>B</sup>, H-5<sup>D</sup>), 3.35-3.39 (m, 1H, H-4<sup>C</sup>), 3.29-3.35 (m, 2H, H-4<sup>D</sup>, -O-CH<sub>2b</sub>-), 3.22 (m, 2H, H-4<sup>A</sup>, H-4<sup>B</sup>), 2.32 (t, *J* = 7.4 Hz, 2H, -CH<sub>2f</sub>-), 2.31 (br. s, 1H, -OH<sup>D</sup>), 1.61-1.68 (m, 2H, -CH<sub>2e</sub>-), 1.51-1.58 (m, 2H, -CH<sub>2c</sub>-), 1.30-1.38 (m, 2H, -CH<sub>2d</sub>-), 1.19-1.29 ppm (m, 12H, H-6<sup>A</sup>, H-6<sup>B</sup>, H-6<sup>C</sup>, H-6<sup>D</sup>); <sup>13</sup>C NMR (126 MHz, CDCl<sub>3</sub>):  $\delta$  174.0, 137.3 (x2), 137.2, 137.1, 128.7, 128.6 (x2), 128.4, 128.3 (x2), 128.2, 128.1 (x2), 100.5, 100.2, 98.6, 97.8, 77.8, 77.5, 76.9, 76.5, 74.1, 73.1, 72.7, 72.5, 72.3, 72.2, 70.0, 67.9, 67.8, 67.5, 67.3, 67.1, 66.5, 64.5, 64.4, 64.3, 51.5, 33.9, 29.1, 25.7, 24.7, 18.7, 18.6, 18.4, 18.3 ppm; HRMS (ESI): *m/z* calcd for C<sub>59</sub>H<sub>74</sub>N<sub>12</sub>O<sub>15</sub>Na [M+Na]<sup>+</sup>: 1213.5289, found: 1213.5284.

5'-Methoxycarbonylpentyl 4-azido-2,3-di-*O*-benzoyl-4,6-dideoxy- $\alpha$ -D-mannopyranosyl (1 $\rightarrow$ 2) 4-azido-3-*O*-benzyl-4,6-dideoxy- $\alpha$ -D-mannopyranosyl (1 $\rightarrow$ 3) 4-azido-2-*O*-benzyl-4,6-dideoxy- $\alpha$ -D-mannopyranosyl (1 $\rightarrow$ 2) 4-azido-3-*O*-benzyl-4,6-dideoxy- $\alpha$ -D-mannopyranosyl (1 $\rightarrow$ 2) 4-azido-3-*O*-benzyl-4,6-dideoxy- $\alpha$ -D-mannopyranoside (28).

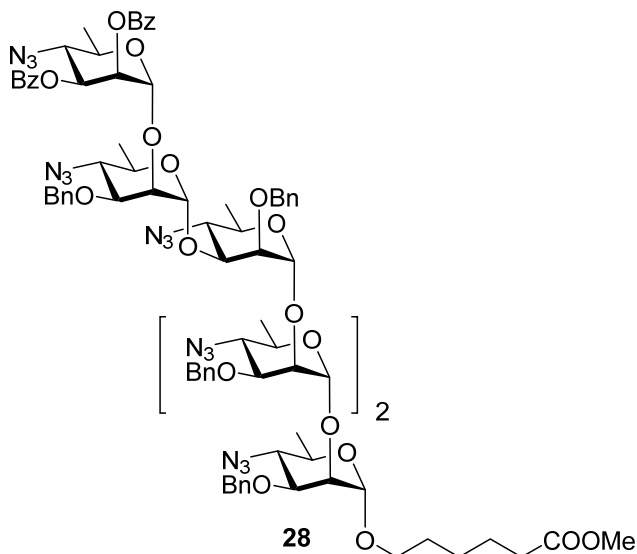

A mixture of glycosyl donor **10** (0.220 g, 0.313 mmol), glycosyl acceptor **27** (0.339 g, 0.285 mmol) and freshly activated molecular sieves (3 Å, 0.5 g) in CH<sub>2</sub>Cl<sub>2</sub> (10 mL) was stirred under argon for 4 h at 21 °C. MeOTf (260 μL, 2.28 mmol) was added and continued stirring for additional 48 h. After that, Et<sub>3</sub>N (1 mL) was added, the solid was filtered off and the residue was rinsed with CH<sub>2</sub>Cl<sub>2</sub> (3 x 30 mL). The combined filtrate (100 mL) was washed with sat. aq. NaHCO<sub>3</sub> (40 mL), water (40 mL), and brine (20 mL). The organic phase was separated, dried over MgSO<sub>4</sub>, and concentrated *in vacuo*. The residue was purified by column chromatography on silica gel (ethyl acetate – toluene gradient elution) to afford the title compound (0.479 g, 92%) as a white foam. Analytical data for **28**: *R*<sub>f</sub> = 0.60 (ethyl acetate/toluene, 0.5/9.5, v/v); [α]<sub>D</sub><sup>21</sup> = +15.3 (c = 1.0, CHCl<sub>3</sub>); <sup>1</sup>H NMR (600 MHz, CDCl<sub>3</sub>): δ 7.06-8.00 (m, 35H, H-Ar), 5.71 (dd, *J*<sub>2,3</sub> = 3.3 Hz, 1H, H-2<sup>F</sup>), 5.58 (dd, *J*<sub>3,4</sub> = 10.3 Hz, 1H, H-3<sup>F</sup>), 5.09 (d, *J*<sub>1,2</sub> = 1.2 Hz, 1H, H-1<sup>E</sup>), 5.05-5.07 (m, 2H, H-1<sup>D</sup>, H-1<sup>F</sup>), 4.95 (d, *J*<sub>1,2</sub> = 1.5 Hz, 1H, H-1<sup>C</sup>), 4.90 (d, *J*<sub>1,2</sub> = 1.7 Hz, 1H, H-1<sup>B</sup>), 4.58-4.71 (m, 9H, H-1<sup>A</sup>, 4 x CH<sub>2</sub>Ph), 4.25 (dd, *J*<sup>2</sup> = 11.4 Hz, 2H, CH<sub>2</sub>Ph), 4.12 (dd, *J*<sub>2,3</sub> = 2.1 Hz, 1H, H-2<sup>E</sup>), 4.02 (dd, *J*<sub>2,3</sub> = 2.4 Hz, 1H, H-2<sup>C</sup>), 3.86-3.93 (m, 3H, H-2<sup>B</sup>, H-3<sup>D</sup>, H-5<sup>F</sup>), 3.79 (dd, *J*<sub>2,3</sub> = 2.4 Hz, 1H, H-2<sup>A</sup>), 3.68-3.74 (m, 8H, H-3<sup>A</sup>, H-3<sup>B</sup>, H-3<sup>C</sup>, H-3<sup>E</sup>, H-4<sup>F</sup>, -OCH<sub>3</sub>), 3.65 (dd, *J*<sub>2,3</sub> = 3.0 Hz, 1H, H-2<sup>D</sup>), 3.54-3.59 (m, 3H, H-4<sup>D</sup>, H-4<sup>E</sup>, -O-CH<sub>2a</sub>-), 3.39-3.53 (m, 5H, H-5<sup>A</sup>, H-5<sup>B</sup>, H-5<sup>C</sup>, H-5<sup>D</sup>, H-5<sup>E</sup>), 3.29-3.36 (m,

3H, H-4<sup>B</sup>, H-4<sup>C</sup>, -O-CH<sub>2b</sub>-), 3.21 (dd,  $J_{4,5}$  = 10.0 Hz, 1H, H-4<sup>A</sup>), 2.32 (t,  $J$  = 7.5 Hz, 2H, -CH<sub>2f</sub>-), 1.61-1.66 (m, 2H, -CH<sub>2e</sub>-), 1.53-1.57 (m, 2H, -CH<sub>2c</sub>-), 1.44 (d,  $J$  = 6.1 Hz, 3H, H-6<sup>F</sup>), 1.31-1.38 (m, 2H, -CH<sub>2d</sub>-), 1.20-1.29 ppm (m, 15H, H-6<sup>A</sup>, H-6<sup>B</sup>, H-6<sup>C</sup>, H-6<sup>D</sup>, H-6<sup>E</sup>); <sup>13</sup>C NMR (126 MHz, CDCl<sub>3</sub>):  $\delta$  174.0, 165.2, 164.9, 137.5, 137.4, 137.3, 137.2, 137.1, 133.4, 133.3, 129.8 (x2), 129.5, 129.4, 129.0, 128.7, 128.6 (x2), 128.5 (x3), 128.4 (x2), 128.3 (x2), 128.2 (x2), 128.1, 127.9, 127.8, 127.7, 127.6, 100.9, 100.5, 100.2, 99.2, 98.6, 98.2, 77.9, 77.7, 77.5, 76.9, 76.4, 74.1, 73.6, 73.1, 72.9, 72.5, 72.4, 72.2 (x2), 72.0, 71.0, 69.4, 68.2, 68.1, 67.9, 67.8, 67.7, 67.5, 67.1, 64.7, 64.5, 64.4, 64.3, 63.6, 63.5, 51.5, 33.9, 29.1, 25.7, 24.7, 18.6 (x3), 18.5 (x2), 18.4 ppm; HRMS (ESI):  $m/z$  calcd for C<sub>92</sub>H<sub>110</sub>N<sub>19</sub>O<sub>23</sub> [M+NH<sub>4</sub>]<sup>+</sup>: 1848.8016, found: 1848.8005.

**5'-Methoxycarbonylpentyl 4-azido-4,6-dideoxy- $\alpha$ -D-mannopyranosyl (1 $\rightarrow$ 3) 4-azido-2-O-benzyl-4,6-dideoxy- $\alpha$ -D-mannopyranoside (29).**

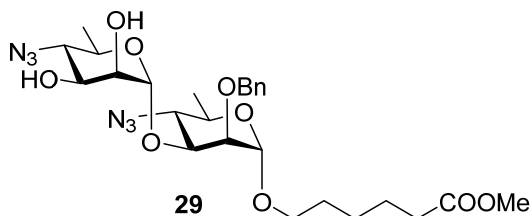

Sodium methoxide (0.2 mL, 0.5 M solution) was added to a solution of **15** (0.350 g, 0.445 mmol) in CH<sub>3</sub>OH (5 mL) until pH ~9 and the resulting mixture was stirred under argon for 4 h at 21 °C. After that, the reaction mixture was neutralized with Amberlite IR 120 (H<sup>+</sup>) ion exchange resin, the resin was filtered off and rinsed successively with CH<sub>3</sub>OH. The combined filtrate was concentrated *in vacuo* and purified by column chromatography on silica gel (ethyl acetate – toluene gradient elution) to afford the title compound (0.221 g, 86%) as a white foam. Analytical data for **29**:  $R_f$  = 0.50 (CH<sub>3</sub>OH/CH<sub>2</sub>Cl<sub>2</sub>, 0.5/9.5, v/v);  $[\alpha]_D^{21}$  = +73.4 (c = 1.0, CHCl<sub>3</sub>); <sup>1</sup>H NMR (500 MHz, CDCl<sub>3</sub>):  $\delta$  7.28-7.41 (m, 5H, H-Ar), 5.07 (s, 1H, H-1<sup>B</sup>), 4.78 (s, 1H, H-1<sup>A</sup>), 4.63 (dd,  $J^2$  = 12.0 Hz, 2H, CH<sub>2</sub>Ph), 4.05 (br. s., 1H, H-2<sup>B</sup>), 3.83-3.92 (m, 2H, H-3<sup>A</sup>, H-3<sup>B</sup>), 3.63-3.71 (m, 5H, H-2<sup>A</sup>, H-5<sup>B</sup>, -OCH<sub>3</sub>), 3.59-3.62 (m, 1H, -O-CH<sub>2a</sub>-), 3.56 (dd,  $J_{4,5}$  = 10.0 Hz, 1H, H-4<sup>A</sup>), 3.48 (dq,  $J$  = 12.0, 6.4 Hz, 1H, H-5<sup>A</sup>), 3.33-3.39 (m, 1H, -O-CH<sub>2b</sub>-), 3.31 (dd,  $J_{4,5}$  = 10.0 Hz, 1H, H-4<sup>B</sup>), 2.64 (br. s., 2H, 2 x -OH<sup>B</sup>), 2.31 (t,  $J$  = 7.4 Hz, 2H, -CH<sub>2f</sub>-), 1.64 (quin,  $J$  = 7.6 Hz, 2H, -CH<sub>2e</sub>-), 1.56 (quin,  $J$  = 7.0 Hz, 2H, -CH<sub>2c</sub>-), 1.31-1.38 (m, 2H, -CH<sub>2d</sub>-), 1.32 (d,  $J_{5,6}$  = 6.2 Hz, 3H, H-6<sup>A</sup>), 1.27 ppm (d,  $J_{5,6}$  = 6.2 Hz, 3H, H-6<sup>B</sup>); <sup>13</sup>C NMR (126 MHz, CDCl<sub>3</sub>):  $\delta$  174.1, 137.6, 128.5, 127.9, 127.6, 101.5, 96.9, 78.3, 76.9,

72.4, 70.3, 70.2, 67.7, 67.5, 67.3, 65.7, 64.7, 51.5, 33.9, 29.0, 25.7, 24.6, 18.5, 18.3 ppm;  
HRMS (ESI):  $m/z$  calcd for  $C_{26}H_{38}N_6O_9Na$   $[M+Na]^+$ : 601.2592, found: 601.2581.

**5'-Methoxycarbonylpentyl 4,6-dideoxy-4-formamido- $\alpha$ -D-mannopyranosyl (1 $\rightarrow$ 3) 4,6-dideoxy-4-formamido- $\alpha$ -D-mannopyranoside (1).**

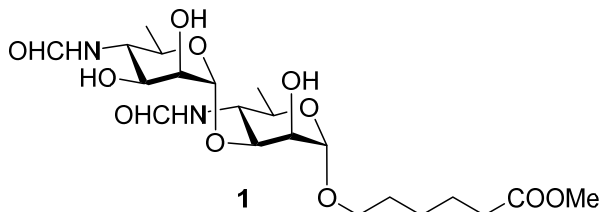

To a stirred solution of **29** (0.150 g, 0.259 mmol), in pyridine (5 mL) and water (2 mL) mixture,  $H_2S$  was bubbled for 0.5 h at 40 °C, and continued stirring for 16 h. After that, argon was bubbled for 10 min, solvents were removed *in vacuo*, and the residue was co-evaporated with toluene (3 x 10 mL) and dried. The high resolution mass spectrometry analysis showed completion of reaction to corresponding amine compound **29a** and no products arising from incomplete reduction. HRMS (ESI):  $m/z$  calcd for  $C_{26}H_{43}N_2O_9$   $[M+H]^+$ : 527.2963; found: 527.2964. This crude material was directly used for formylation.

Compound **29a** in  $CH_3OH$  (5 mL) at -20 °C was added a freshly prepared formic anhydride<sup>6</sup> (5 mL, ethereal solution) and stirred for 3 h, then slowly allowed to warm to 21 °C. After that, solvents were evaporated and the residue was passed through column chromatography on silica gel (methanol – dichloromethane gradient elution) to afford disaccharide **29b**. HRMS (ESI):  $m/z$  calcd for  $C_{28}H_{42}N_2NaO_{11}$   $[M+Na]^+$ : 605.2681; found: 605.2675.

Compound **29b** was dissolved in  $CH_3OH/H_2O$  (2:1, 6 mL),  $Pd(OH)_2$  on carbon (20%, 0.050 g) was added. Then it was stirred under a pressure of hydrogen gas at 21 °C for 16 h. After filtration through celite pad and washed with  $CH_3OH$  (3 x 10 mL), and solvents were removed *in vacuo*. The residue was purified by column chromatography on silica gel (methanol – dichloromethane gradient elution) to afford the title compound (0.075 g, 59%, over 3 steps) as a white foam. Analytical data for **1**:  $R_f$  = 0.20 ( $CH_3OH/CH_2Cl_2$ , 1.5/8.5, v/v);  $^1H$  NMR (700 MHz,  $D_2O$ ):  $\delta$  8.21 ((d,  $J$  = 15.4 Hz) and 8.03 (d,  $J$  = 13.3 Hz), 2H,  $NCHO$ ), 4.81-4.95 (m, 2H, 2 x H-1), 3.85-4.04 (m, 8H, 2 x H-2, 2 x H-3, 2 x H-4, 2 x H-5), 3.69-3.74 (m, 1H, -O- $CH_{2a}$ -), 3.70 (s, 3H, -O $CH_3$ ), 3.33-3.58 (m, 1H, -O- $CH_{2b}$ -), 2.42 (t,  $J_{fe}$  = 7.4 Hz, 2H, - $CH_{2f}$ -), 1.58-1.69 (m, 4H, - $CH_{2e}$ -, - $CH_{2c}$ -), 1.34-1.45 (m, 2H, - $CH_{2d}$ -), 1.20-1.30 ppm (m, 6H, 2 x H-6);  $^{13}C$  NMR (126 MHz,  $D_2O$ ):  $\delta$  178.5, 168.9, 168.8, 165.8, 165.7, 103.3, 103.2, 100.6, 100.5, 77.8 (x2), 70.2, 70.0, 69.9 (x2), 69.0, 68.9 (x2), 68.8 (x2), 68.6, 68.4,

68.2, 67.8, 57.6, 56.5, 53.1, 52.7, 52.6, 51.6, 34.6, 29.1, 25.9, 25.0, 17.8, 17.7, 17.6 ppm; HRMS (ESI):  $m/z$  calcd for  $C_{21}H_{36}N_2O_{11}Na$   $[M+Na]^+$ : 515.2211, found: 515.2210.

**5'-Methoxycarbonylpentyl 4-azido-4,6-dideoxy- $\alpha$ -D-mannopyranosyl (1 $\rightarrow$ 2) 4-azido-3-O-benzyl-4,6-dideoxy- $\alpha$ -D-mannopyranosyl (1 $\rightarrow$ 3) 4-azido-2-O-benzyl-4,6-dideoxy- $\alpha$ -D-mannopyranoside (30).**

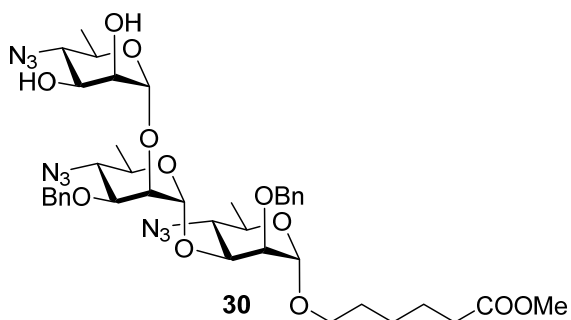

Sodium methoxide (0.2 mL, 0.5 M solution) was added to a solution of **16** (0.352 g, 0.336 mmol) in  $CH_3OH$  (5 mL) until pH  $\sim$ 9 and the resulting mixture was stirred under argon for 4 h at 21  $^{\circ}C$ . After that, the reaction mixture was neutralized with Amberlite IR 120 ( $H^+$ ) ion exchange resin, the resin was filtered off and rinsed successively with  $CH_3OH$ . The combined filtrate was concentrated *in vacuo* and purified by column chromatography on silica gel (ethyl acetate – toluene gradient elution) to afford the title compound (0.256 g, 91%) as off-white foam. Analytical data for **30**:  $R_f$  = 0.30 (ethyl acetate/toluene, 1/4, v/v);  $[\alpha]_D^{21}$  = +72.4 ( $c$  = 1.0,  $CHCl_3$ );  $^1H$  NMR (500 MHz,  $CDCl_3$ ):  $\delta$  7.27-7.39 (m, 10H, H-Ar), 5.02 (s, 1H, H-1<sup>B</sup>), 4.93 (s, 1H, H-1<sup>C</sup>), 4.77 (s, 1H, H-1<sup>A</sup>), 4.65 (dd,  $J^2$  = 11.0 Hz, 2H,  $CH_2Ph$ ), 4.58 (dd,  $J^2$  = 12.0 Hz, 2H,  $CH_2Ph$ ), 4.11 (br. s., 1H, H-2<sup>B</sup>), 3.94 (br. s., 1H, H-2<sup>C</sup>), 3.81-3.87 (m, 2H, H-3<sup>A</sup>, H-3<sup>C</sup>), 3.78 (dd,  $J_{3,4}$  = 10.1 Hz, 1H, H-3<sup>B</sup>), 3.67 (s, 3H,  $-OCH_3$ ), 3.53-3.66 (m, 5H, H-2<sup>A</sup> H-4<sup>A</sup> H-5<sup>B</sup> H-5<sup>C</sup>,  $-O-CH_{2a-}$ ), 3.44-3.53 (m, 1H, H-5<sup>A</sup>), 3.40 (dd,  $J_{4,5}$  = 10.0 Hz, 1H, H-4<sup>B</sup>), 3.32-3.37 (m, 1H,  $-O-CH_{2b-}$ ), 3.34 (dd,  $J_{4,5}$  = 9.9 Hz, 1H, H-4<sup>C</sup>), 2.56 (d,  $J_{2,-OH}$  = 6.2 Hz, 1H,  $-OH^C$ ), 2.31 (t,  $J$  = 7.4 Hz, 3H,  $-CH_{2f-}$ , 3- $OH^C$ ), 1.63 (quin,  $J$  = 7.4 Hz, 2H,  $-CH_{2e-}$ ), 1.56 (quin,  $J$  = 7.1 Hz, 2H,  $-CH_{2c-}$ ), 1.28-1.39 (m, 8H, H-6<sup>A</sup>, H-6<sup>B</sup>,  $-CH_{2d-}$ ), 1.24 ppm (d,  $J_{5,6}$  = 6.2 Hz, 3H, H-6<sup>C</sup>);  $^{13}C$  NMR (126 MHz,  $CDCl_3$ ):  $\delta$  174.0, 137.6, 137.4, 128.6, 128.5, 128.1, 127.9, 127.5, 101.0 (x2), 97.0, 78.3, 77.8, 73.1, 72.5, 72.1, 70.2, 69.9, 67.9, 67.6, 67.4, 67.3, 65.8, 64.8, 64.0, 51.5, 33.9, 29.0, 25.6, 24.6, 18.6, 18.5, 18.3 ppm; HRMS (ESI):  $m/z$  calcd for  $C_{39}H_{53}N_9O_{12}Na$   $[M+Na]^+$ : 862.3706, found: 862.3691.

**5'-Methoxycarbonylpentyl 4,6-dideoxy-4-formamido- $\alpha$ -D-mannopyranosyl (1 $\rightarrow$ 2) 4,6-dideoxy-4-formamido- $\alpha$ -D-mannopyranosyl (1 $\rightarrow$ 3) 4,6-dideoxy-4-formamido- $\alpha$ -D-mannopyranoside (2).**

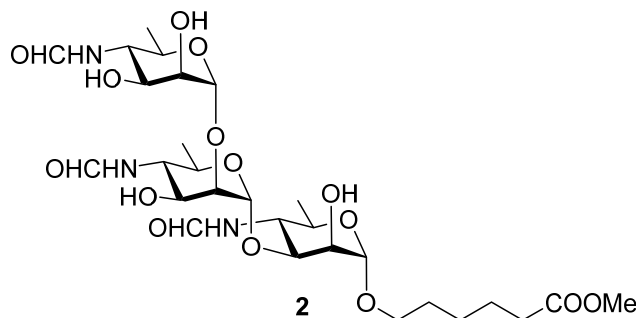

To a stirred solution of **30** (0.114 g, 0.136 mmol), in pyridine (5 mL) and water (2 mL) mixture, H<sub>2</sub>S was bubbled for 0.5 h at 40 °C, and continued stirring for 16 h. After that, argon was bubbled for 10 min, solvents were removed *in vacuo*, and the residue was co-evaporated with toluene (3 x 10 mL) and dried. The high resolution mass spectrometry analysis showed completion of reaction to corresponding amine compound **30a** and no products arising from incomplete reduction. HRMS (ESI): *m/z* calcd for C<sub>39</sub>H<sub>60</sub>N<sub>3</sub>O<sub>12</sub> [*M*+H]<sup>+</sup>: 762.4172; found: 762.4171. This crude material was directly used for formylation.

Compound **30a** in CH<sub>3</sub>OH (5 mL) at -20 °C was added a freshly prepared formic anhydride (5 mL, ethereal solution) and stirred for 3 h, then slowly allowed to warm to 21 °C. After that, solvents were evaporated and the residue was passed through column chromatography on silica gel (methanol – dichloromethane gradient elution) to afford disaccharide **30b**. HRMS (ESI): *m/z* calcd for C<sub>42</sub>H<sub>59</sub>N<sub>3</sub>O<sub>15</sub>Na [*M*+Na]<sup>+</sup>: 868.3838; found: 868.3827.

Compound **30b** was dissolved in CH<sub>3</sub>OH/H<sub>2</sub>O (2:1, 5 mL), Pd(OH)<sub>2</sub> on carbon (20%, 0.040 g) was added. Then it was stirred under a pressure of hydrogen gas at 21 °C for 16 h. After filtration through celite pad and washed with CH<sub>3</sub>OH (3 x 10 mL), and solvents were removed *in vacuo*. The residue was purified by column chromatography on silica gel (methanol – dichloromethane gradient elution) to afford the title compound (0.046 g, 51%, over 3 steps) as a white foam. Analytical data for **2**: R<sub>f</sub> = 0.40 (CH<sub>3</sub>OH/CH<sub>2</sub>Cl<sub>2</sub>, 3/7, v/v); <sup>1</sup>H NMR (700 MHz, D<sub>2</sub>O): δ 8.20-8.24 (*Z*) and 8.02-8.06 (*E*) (m, 3H, NCHO), 4.82-5.08 (m, 3H, 3 x H-1), 3.84-4.14 (m, 12H, 3 x H-2, 3 x H-3, 3 x H-4, 3 x H-5), 3.69-3.75 (m, 1H, -O-CH<sub>2a</sub>-), 3.70 (s, 3H, -OCH<sub>3</sub>), 3.36-3.57 (m, 1H, -O-CH<sub>2b</sub>-), 2.42 (t, *J*<sub>f,e</sub> = 7.4 Hz, 2H, -CH<sub>2f</sub>-), 1.60-1.68 (m, 4H, -CH<sub>2e</sub>-, -CH<sub>2c</sub>-), 1.36-1.44 (m, 2H, -CH<sub>2d</sub>-), 1.21-1.32 ppm (m, 9H, 3 x H-6); <sup>13</sup>C NMR (126 MHz, D<sub>2</sub>O): δ 178.5, 168.8, 168.7, 165.8 (x2), 165.6 (x2), 103.4, 103.3, 102.9, 101.8, 101.7, 100.6, 100.5, 79.0 (x2), 78.9, 78.2, 78.0, 77.7 (x3), 70.0, 69.9, 69.8, 69.4,

69.2, 69.0, 68.9 (x2), 68.8 (x2), 68.7, 68.6 (x2), 68.5 (x2), 68.3 (x2), 67.9, 67.7, 57.8, 57.7, 56.4, 53.1, 52.8, 52.7, 51.9, 34.6, 29.1, 25.9, 25.0, 18.1, 17.9 (x3), 17.8, 17.7 ppm; HRMS (ESI):  $m/z$  calcd for  $C_{28}H_{47}N_3O_{15}Na$   $[M+Na]^+$ : 688.2899, found: 688.2895.

**5'-Methoxycarbonylpentyl 4-azido-4,6-dideoxy- $\alpha$ -D-mannopyranosyl (1 $\rightarrow$ 3) 4-azido-2-O-benzyl-4,6-dideoxy- $\alpha$ -D-mannopyranosyl (1 $\rightarrow$ 2) 4-azido-3-O-benzyl-4,6-dideoxy- $\alpha$ -D-mannopyranoside (31).**

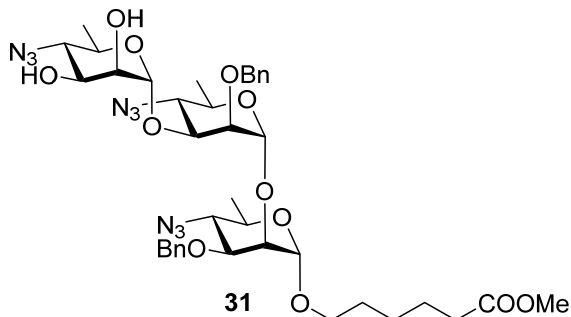

Sodium methoxide (0.5 mL, 0.5 M solution) was added to a solution of **19** (0.458 g, 0.437 mmol) in  $CH_3OH$  (10 mL) until pH  $\sim$ 9 and the resulting mixture was stirred under argon for 4 h at 21  $^{\circ}C$ . After that, the reaction mixture was neutralized with Amberlite IR 120 ( $H^+$ ) ion exchange resin, the resin was filtered off and rinsed successively with  $CH_3OH$ . The combined filtrate was concentrated *in vacuo* and purified by column chromatography on silica gel (ethyl acetate – toluene gradient elution) to afford the title compound (0.341 g, 93%) as oil. Analytical data for **31**:  $R_f$  = 0.30 (ethyl acetate/toluene, 1/4, v/v);  $[\alpha]_D^{21}$  = +58.9 ( $c$  = 1.3,  $CHCl_3$ );  $^1H$  NMR (500 MHz,  $CDCl_3$ ):  $\delta$  7.12–7.39 (m, 10H, H-Ar), 5.08 (d,  $J_{1,2}$  = 1.8 Hz, 1H, H-1<sup>B</sup>), 5.05 (d,  $J_{1,2}$  = 1.6 Hz, 1H, H-1<sup>C</sup>), 4.66 (d,  $J_{1,2}$  = 1.6 Hz, 1H, H-1<sup>A</sup>), 4.65 (dd,  $J^2$  = 11.0 Hz, 2H,  $CH_2Ph$ ), 4.21 (dd,  $J^2$  = 12.0 Hz, 2H,  $CH_2Ph$ ), 4.00 (br. s., 1H, H-2<sup>C</sup>), 3.97 (dd,  $J_{2,3}$  = 2.5 Hz, 1H, H-2<sup>A</sup>), 3.90 (dd,  $J_{3,4}$  = 10.0 Hz, 1H, H-3<sup>B</sup>), 3.77–3.81 (m, 1H, H-3<sup>C</sup>), 3.75 (dd,  $J_{3,4}$  = 9.9 Hz, 1H, H-3<sup>A</sup>), 3.68 (s, 3H,  $-OCH_3$ ), 3.65 (dd,  $J_{2,3}$  = 3.1 Hz, 1H, H-2<sup>B</sup>), 3.59–3.61 (m, 1H,  $-O-CH_{2a-}$ ), 3.52–3.58 (m, 2H, H-4<sup>B</sup>, H-5<sup>B</sup>), 3.45–3.50 (m, 2H, H-5<sup>A</sup>, H-5<sup>C</sup>), 3.34–3.40 (m, 1H,  $-O-CH_{2b-}$ ), 3.33 (dd,  $J_{4,5}$  = 9.5 Hz, 1H, H-4<sup>A</sup>), 3.28 (dd,  $J_{4,5}$  = 11.0 Hz, 1H, H-4<sup>C</sup>), 2.61 (br. s., 2H, 2 x  $-OH^C$ ), 2.33 (t,  $J$  = 7.4 Hz, 2H,  $-CH_{2f-}$ ), 1.62–1.73 (m, 2H,  $-CH_{2e-}$ ), 1.54–1.61 (m, 2H,  $-CH_{2c-}$ ), 1.33–1.42 (m, 2H,  $-CH_{2d-}$ ), 1.28–1.32 (m, 6H, H-6<sup>A</sup>, H-6<sup>B</sup>), 1.19 ppm (d,  $J_{5,6}$  = 6.2 Hz, 3H, H-6<sup>C</sup>);  $^{13}C$  NMR (126 MHz,  $CDCl_3$ ):  $\delta$  174.1, 137.3 (x2), 128.5, 128.4, 128.2, 128.1, 127.8, 127.6, 101.5, 98.8, 98.1, 78.4, 77.5, 76.4, 73.2, 72.6, 71.7, 70.1, 70.0, 67.9, 67.5, 67.4, 67.2, 65.5, 64.7, 64.4, 51.5, 33.9, 29.0, 25.7, 24.6, 18.6, 18.5, 18.2 ppm; HRMS (ESI):  $m/z$  calcd for  $C_{39}H_{53}N_9O_{12}Na$   $[M+Na]^+$ : 862.3706, found: 862.3700.

**5'-Methoxycarbonylpentyl 4,6-dideoxy-4-formamido- $\alpha$ -D-mannopyranosyl (1 $\rightarrow$ 3) 4,6-dideoxy-4-formamido- $\alpha$ -D-mannopyranosyl (1 $\rightarrow$ 2) 4,6-dideoxy-4-formamido- $\alpha$ -D-mannopyranoside (3).**

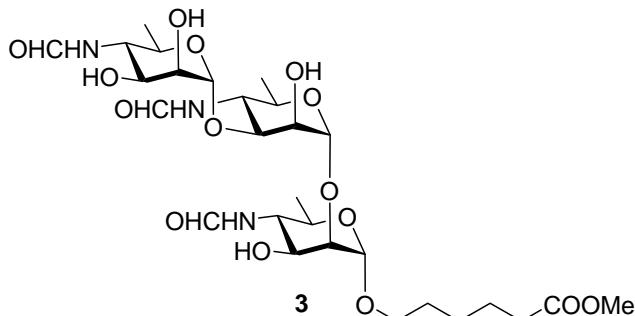

To a stirred solution of **31** (0.157 g, 0.187 mmol), in pyridine (5 mL) and water (2 mL) mixture, H<sub>2</sub>S was bubbled for 0.5 h at 40 °C, and continued stirring for 16 h. After that, argon was bubbled for 10 min, solvents were removed *in vacuo*, and the residue was co-evaporated with toluene (3 x 10 mL) and dried. The high resolution mass spectrometry analysis showed completion of reaction to corresponding amine compound **31a** and no products arising from incomplete reduction. HRMS (ESI): *m/z* calcd for C<sub>39</sub>H<sub>60</sub>N<sub>3</sub>O<sub>12</sub> [*M*+H]<sup>+</sup>: 762.4172; found: 762.4182. This crude material was directly used for formylation.

Compound **31a** in CH<sub>3</sub>OH (5 mL) at -20 °C was added a freshly prepared formic anhydride (5 mL, ethereal solution) and stirred for 3 h, then slowly allowed to warm to 21 °C. After that, solvents were evaporated and the residue was passed through column chromatography on silica gel (methanol – dichloromethane gradient elution) to afford disaccharide **31b**. HRMS (ESI): *m/z* calcd for C<sub>42</sub>H<sub>59</sub>N<sub>3</sub>O<sub>15</sub>Na [*M*+Na]<sup>+</sup>: 868.3838; found: 868.3834.

Compound **31b** was dissolved in CH<sub>3</sub>OH/H<sub>2</sub>O (2:1, 5 mL), Pd(OH)<sub>2</sub> on carbon (20%, 0.050 g) was added. Then it was stirred under a pressure of hydrogen gas at 21 °C for 16 h. After filtration through celite pad and washed with CH<sub>3</sub>OH (3 x 10 mL), and solvents were removed *in vacuo*. The residue was purified by column chromatography on silica gel (methanol – dichloromethane gradient elution) to afford the title compound (0.053 g, 43%, over 3 steps) as a white foam. Analytical data for **3**: R<sub>f</sub> = 0.50 (CH<sub>3</sub>OH/CH<sub>2</sub>Cl<sub>2</sub>, 3/7, v/v); <sup>1</sup>H NMR (700 MHz, D<sub>2</sub>O): δ 8.20-8.24 (*Z*) and 8.02-8.06 (*E*) (m, 3H, NCHO), 4.92-5.04 (m, 3H, 3 x H-1), 3.80-4.23 (m, 12H, 3 x H-2, 3 x H-3, 3 x H-4, 3 x H-5), 3.69-3.74 (m, 1H, -O-CH<sub>2a</sub>-), 3.70 (s, 3H, -OCH<sub>3</sub>), 3.35-3.58 (m, 1H, -O-CH<sub>2b</sub>-), 2.42 (t, *J*<sub>fe</sub> = 7.4 Hz, 2H, -CH<sub>2f</sub>-), 1.58-1.67 (m, 4H, -CH<sub>2e</sub>-, -CH<sub>2c</sub>-), 1.35-1.44 (m, 2H, -CH<sub>2d</sub>-), 1.22-1.31 ppm (m, 9H, 3 x H-6); <sup>13</sup>C NMR (176 MHz, D<sub>2</sub>O): δ 178.3, 168.7, 168.6, 168.5, 165.6 (x2), 165.5, 103.1, 102.9



(x2), 102.8, 102.7 (x2), 99.0 (x3), 78.6 (x2), 78.5, 77.3, 77.2, 77.1, 70.1, 70.0, 69.8, 69.5, 69.4, 68.9, 68.8 (x2), 68.7 (x2), 68.6 (x2), 68.5 (x2), 68.4 (x2), 68.3, 68.2, 67.8, 57.7, 57.4, 56.3, 52.9, 52.8, 52.4, 51.3, 34.4, 28.9, 25.7, 24.8, 17.6 (x2), 17.5, 17.4 ppm; HRMS (ESI):  $m/z$  calcd for  $C_{28}H_{47}N_3O_{15}Na$   $[M+Na]^+$ : 688.2899, found: 688.2893.

**5'-Methoxycarbonylpentyl 4-azido-4,6-dideoxy- $\alpha$ -D-mannopyranosyl (1 $\rightarrow$ 2) 4-azido-3-O-benzyl-4,6-dideoxy- $\alpha$ -D-mannopyranosyl (1 $\rightarrow$ 3) 4-azido-2-O-benzyl-4,6-dideoxy- $\alpha$ -D-mannopyranosyl (1 $\rightarrow$ 2) 4-azido-3-O-benzyl-4,6-dideoxy- $\alpha$ -D-mannopyranoside (32).**

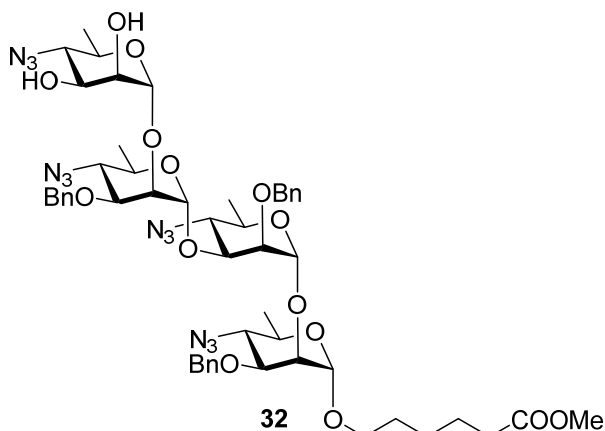

Sodium methoxide (0.5 mL, 0.5 M solution) was added to a solution of **20** (0.391 g, 0.299 mmol) in  $CH_3OH$  /THF mixture (4:1, 15 mL) until pH  $\sim$ 9 and the resulting mixture was stirred under argon for 5 h at 21  $^{\circ}C$ . After that, the reaction mixture was neutralized with Amberlite IR 120 ( $H^+$ ) ion exchange resin, the resin was filtered off and rinsed successively with  $CH_3OH$ . The combined filtrate was concentrated *in vacuo* and purified by column chromatography on silica gel (ethyl acetate – toluene gradient elution) to afford the title compound (0.311 g, 95%) as oil. Analytical data for **32**:  $R_f$  = 0.40 (ethyl acetate/toluene, 1/4, v/v);  $[\alpha]_D^{21}$  = +51.2 ( $c$  = 1.0,  $CHCl_3$ );  $^1H$  NMR (500 MHz,  $CDCl_3$ ):  $\delta$  7.10-7.39 (m, 15H, H-Ar), 5.07 (d,  $J_{1,2}$  = 1.6 Hz, 1H, H-1<sup>B</sup>), 5.02 (d,  $J_{1,2}$  = 1.6 Hz, 1H, H-1<sup>C</sup>), 4.91 (d,  $J_{1,2}$  = 1.5 Hz, 1H, H-1<sup>D</sup>), 4.67 (dd,  $J^2$  = 11.0 Hz, 2H,  $CH_2Ph$ ), 4.66 (d,  $J_{1,2}$  = 2.0 Hz, 1H, H-1<sup>A</sup>), 4.60 (dd,  $J^2$  = 12.0 Hz, 2H,  $CH_2Ph$ ), 4.20 (dd,  $J^2$  = 12.0 Hz, 2H,  $CH_2Ph$ ), 4.08 (dd,  $J_{2,3}$  = 3.0 Hz, 1H, H-2<sup>C</sup>), 3.96 (dd,  $J_{2,3}$  = 2.8 Hz, 1H, H-2<sup>A</sup>), 3.93 (m, 1H, H-2<sup>D</sup>), 3.82-3.88 (m, 2H, H-3<sup>B</sup> H-3<sup>D</sup>), 3.75 (dd,  $J_{3,4}$  = 9.9 Hz, 1H, H-3<sup>A</sup>), 3.70 (dd,  $J_{3,4}$  = 10.0 Hz, 1H, H-3<sup>C</sup>), 3.68 (s, 3H,  $-OCH_3$ ), 3.64-3.67 (m, 1H, H-5<sup>D</sup>), 3.58-3.64 (m, 2H, H-2<sup>B</sup>,  $-O-CH_{2a-}$ ), 3.52-3.58 (m, 2H, H-4<sup>B</sup>, H-5<sup>B</sup>), 3.44-3.51 (m, 1H, H-5<sup>A</sup>), 3.39-3.43 (m, 1H, H-5<sup>C</sup>), 3.34-3.39 (m, 2H, H-4<sup>C</sup>,  $-O-CH_{2b-}$ ), 3.32 (dd,  $J_{4,5}$  = 10.5 Hz, 1H, H-4<sup>A</sup>), 3.29 (dd,  $J_{4,5}$  = 10.0 Hz, 1H, H-4<sup>D</sup>), 2.42 (d,  $J_{3,-OH}$  = 7.3 Hz, 1H,  $-OH^D$ ), 2.33 (t,  $J$  = 7.5 Hz, 2H,  $-CH_{2f-}$ ), 2.12 (d,  $J_{2,-OH}$  = 4.0 Hz, 1H,  $-OH^D$ ), 1.66 (quin,  $J$

= 7.6 Hz, 2H,  $-CH_{2e}-$ ), 1.53-1.61 (m, 2H,  $-CH_{2c}-$ ), 1.35-1.42 (m, 2H,  $-CH_{2d}-$ ), 1.26-1.35 (m, 9H, H-6<sup>A</sup>, H-6<sup>B</sup>, H-6<sup>C</sup>), 1.17 ppm (d,  $J_{5,6} = 5.9$  Hz, 3H, H-6<sup>D</sup>);  $^{13}\text{C}$  NMR (126 MHz,  $\text{CDCl}_3$ ):  $\delta$  174.0, 137.5, 137.4, 137.3, 128.5, 128.4, 128.2, 128.0 (x2), 127.8, 127.5, 101.0, 100.8, 98.8, 98.2, 78.4, 77.9, 77.5, 76.4, 73.2, 72.5, 72.1, 71.8, 70.0, 69.7, 67.9 (x2), 67.5 (x2), 67.1, 65.8 (x2), 64.7, 64.6, 63.9, 51.5, 33.9, 29.0, 25.7, 24.7, 18.6 (x2), 18.5, 18.3 ppm; HRMS (ESI):  $m/z$  calcd for  $\text{C}_{52}\text{H}_{68}\text{N}_{12}\text{O}_{15}\text{Na}$   $[\text{M}+\text{Na}]^+$ : 1123.4806, found: 1123.4812.

**5'-Methoxycarbonylpentyl 4,6-dideoxy-4-formamido- $\alpha$ -D-mannopyranosyl (1 $\rightarrow$ 2) 4,6-dideoxy-4-formamido- $\alpha$ -D-mannopyranosyl (1 $\rightarrow$ 3) 4,6-dideoxy-4-formamido- $\alpha$ -D-mannopyranosyl (1 $\rightarrow$ 2) 4,6-dideoxy-4-formamido- $\alpha$ -D-mannopyranoside (4).**

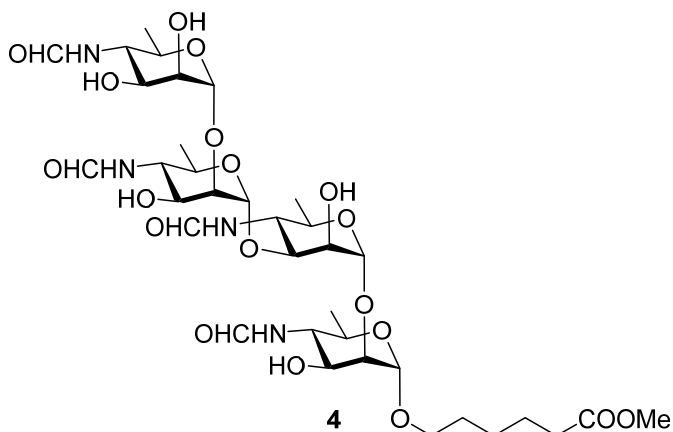

To a stirred solution of **32** (0.146 g, 0.132 mmol), in pyridine (5 mL) and water (2 mL) mixture,  $\text{H}_2\text{S}$  was bubbled for 0.5 h at 40  $^\circ\text{C}$ , and continued stirring for 16 h. After that, argon was bubbled for 10 min, solvents were removed *in vacuo*, and the residue was co-evaporated with toluene (3 x 10 mL) and dried. The high resolution mass spectrometry analysis showed completion of reaction to corresponding amine compound **32a** and no products arising from incomplete reduction. HRMS (ESI):  $m/z$  calcd for  $\text{C}_{52}\text{H}_{77}\text{N}_4\text{O}_{15}$   $[\text{M}+\text{H}]^+$ : 997.5380; found: 997.5366. This crude material was directly used for formylation.

Compound **32a** in  $\text{CH}_3\text{OH}$  (5 mL) at -20  $^\circ\text{C}$  was added a freshly prepared formic anhydride (5 mL, ethereal solution) and stirred for 3 h, then slowly allowed to warm to 21  $^\circ\text{C}$ . After that, solvents were evaporated and the residue was passed through column chromatography on silica gel (methanol – dichloromethane gradient elution) to afford disaccharide **32b**. HRMS (ESI):  $m/z$  calcd for  $\text{C}_{56}\text{H}_{76}\text{N}_4\text{O}_{19}\text{Na}$   $[\text{M}+\text{Na}]^+$ : 1131.4996; found: 1131.4992.

Compound **32b** was dissolved in  $\text{CH}_3\text{OH}/\text{H}_2\text{O}$  (2:1, 5 mL),  $\text{Pd}(\text{OH})_2$  on carbon (20%, 0.050 g) was added. Then it was stirred under a pressure of hydrogen gas at 21  $^\circ\text{C}$  for 16 h. After filtration through celite pad and washed with  $\text{CH}_3\text{OH}$  (3 x 10 mL), and solvents were

removed *in vacuo*. The residue was purified by column chromatography on silica gel (methanol – dichloromethane gradient elution) to afford the title compound (0.068 g, 61%, over 3 steps) as a white foam. Analytical data for **4**:  $R_f$  = 0.30 (CH<sub>3</sub>OH/CH<sub>2</sub>Cl<sub>2</sub>, 3/7, v/v); <sup>1</sup>H NMR (500 MHz, D<sub>2</sub>O):  $\delta$  8.26-8.33 (*Z*) and 8.06-8.14 (*E*) (m, 4H, NCHO), 4.98-5.20 (m, 4H, 4 x H-1), 3.85-4.28 (m, 16H, 4 x H-2, 4 x H-3, 4 x H-4, 4 x H-5), 3.74-3.82 (m, 4H, -O-CH<sub>2a</sub>-, -OCH<sub>3</sub>), 3.44-3.66 (m, 1H, -O-CH<sub>2b</sub>-), 2.49 (t,  $J_{f,e}$  = 7.4 Hz, 2H, -CH<sub>2f</sub>-), 1.65-1.75 (m, 4H, -CH<sub>2e</sub>-, -CH<sub>2c</sub>-), 1.42-1.51 (m, 2H, -CH<sub>2d</sub>-), 1.28-1.39 ppm (m, 12H, 4 x H-6); <sup>13</sup>C NMR (126 MHz, D<sub>2</sub>O):  $\delta$  178.5, 168.8, 168.7, 168.6, 165.8, 165.6, 103.3, 103.2, 102.9, 102.8, 102.7, 101.9, 101.6, 99.3, 99.2, 79.3, 78.9, 78.7, 78.5, 78.4, 78.1, 77.3, 69.9 (x2), 69.8, 69.7, 69.4, 69.3, 69.0, 68.9, 68.8 (x2), 68.7, 68.6, 68.5, 68.4, 68.3, 68.0, 58.0, 57.7, 56.5, 53.1, 52.9, 52.8, 52.7, 51.8, 34.6, 29.1, 25.9, 25.0, 18.1 (x2), 18.0 (x2), 17.9 (x2), 17.8 (x2), 17.7 (x2) ppm; HRMS (ESI):  $m/z$  calcd for C<sub>35</sub>H<sub>58</sub>N<sub>4</sub>O<sub>19</sub>Na [M+Na]<sup>+</sup>: 861.3587, found: 861.3580.

**5'-Methoxycarbonylpentyl 4-azido-4,6-dideoxy- $\alpha$ -D-mannopyranosyl (1 $\rightarrow$ 2) 4-azido-3-O-benzyl-4,6-dideoxy- $\alpha$ -D-mannopyranosyl (1 $\rightarrow$ 3) 4-azido-2-O-benzyl-4,6-dideoxy- $\alpha$ -D-mannopyranosyl (1 $\rightarrow$ 2) 4-azido-3-O-benzyl-4,6-dideoxy- $\alpha$ -D-mannopyranosyl (1 $\rightarrow$ 2) 4-azido-3-O-benzyl-4,6-dideoxy- $\alpha$ -D-mannopyranosyl (1 $\rightarrow$ 2) 4-azido-3-O-benzyl-4,6-dideoxy- $\alpha$ -D-mannopyranoside (33).**

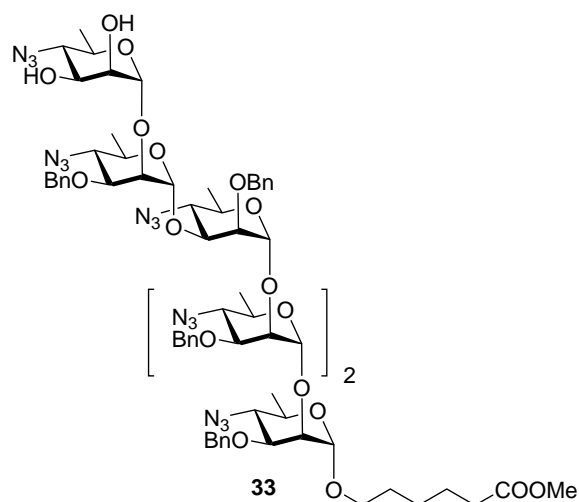

Sodium methoxide (0.8 mL, 0.5 M solution) was added to a solution of **28** (0.413 g, 0.225 mmol) in CH<sub>3</sub>OH (12 mL) until pH ~9 and the resulting mixture was stirred under argon for 6 h at 21 °C. After that, the reaction mixture was neutralized with Amberlite IR 120 (H<sup>+</sup>) ion exchange resin, the resin was filtered off and rinsed successively with CH<sub>3</sub>OH. The combined filtrate was concentrated *in vacuo* and purified by column chromatography on silica gel (ethyl

acetate – toluene gradient elution) to afford the title compound (0.334 g, 91%) as a white foam. Analytical data for **33**:  $R_f$  = 0.40 (ethyl acetate/toluene, 1/9, v/v);  $[\alpha]_D^{21}$  = +61.0 ( $c$  = 1.0,  $\text{CHCl}_3$ );  $^1\text{H}$  NMR (500 MHz,  $\text{CDCl}_3$ ):  $\delta$  7.14-7.38 (m, 25H, H-Ar), 5.03-5.05 (br. s., 2H, H-1<sup>D</sup>, H-1<sup>E</sup>), 4.94 (d,  $J_{1,2}$  = 1.5 Hz, 1H, H-1<sup>C</sup>), 4.91 (d,  $J_{1,2}$  = 1.2 Hz, 1H, H-1<sup>B</sup>), 4.90 (d,  $J_{1,2}$  = 1.5 Hz, 1H, H-1<sup>F</sup>), 4.57-4.70 (m, 9H, H-1<sup>A</sup>, 4 x  $\text{CH}_2\text{Ph}$ ), 4.23 (dd,  $J^2$  = 11.5 Hz, 2H,  $\text{CH}_2\text{Ph}$ ), 4.10 (dd,  $J_{2,3}$  = 2.5 Hz, 1H, H-2<sup>E</sup>), 4.01 (dd,  $J_{2,3}$  = 2.0 Hz, 1H, H-2<sup>C</sup>), 3.95 (br. s., 1H, H-3<sup>F</sup>), 3.82-3.88 (m, 3H, H-2<sup>B</sup>, H-3<sup>D</sup>, H-2<sup>F</sup>), 3.79 (dd,  $J_{2,3}$  = 2.5 Hz, 1H, H-2<sup>A</sup>), 3.65-3.73 (m, 8H, H-3<sup>A</sup>, H-3<sup>B</sup>, H-3<sup>C</sup>, H-3<sup>E</sup>, H-4<sup>F</sup>, - $\text{OCH}_3$ ), 3.63 (dd,  $J_{2,3}$  = 2.3 Hz, 1H, H-2<sup>D</sup>), 3.48-3.60 (m, 3H, H-4<sup>E</sup>, H-5<sup>F</sup>, - $\text{O-CH}_{2a}$ -), 3.37-3.49 (m, 5H, H-5<sup>A</sup>, H-5<sup>B</sup>, H-5<sup>C</sup>, H-5<sup>D</sup>, H-5<sup>E</sup>), 3.27-3.35 (m, 4H, H-4<sup>B</sup>, H-4<sup>C</sup>, H-4<sup>D</sup>, - $\text{O-CH}_{2b}$ -), 3.20 (dd,  $J_{4,5}$  = 9.9 Hz, 1H, H-4<sup>A</sup>), 2.38 (d,  $J_{2,-\text{OH}}$  = 6.8 Hz, 1H, -OH<sup>F</sup>), 2.34 (t,  $J$  = 7.4 Hz, 2H, - $\text{CH}_{2f}$ -), 2.05 (d,  $J_{3,-\text{OH}}$  = 3.5 Hz, 1H, -OH<sup>F</sup>), 1.61-1.67 (m, 2H, - $\text{CH}_{2e}$ -), 1.51-1.58 (m, 2H, - $\text{CH}_{2c}$ -), 1.15-1.35 ppm (m, 20H, - $\text{CH}_{2d}$ -, H-6<sup>A</sup>, H-6<sup>B</sup>, H-6<sup>C</sup>, H-6<sup>D</sup>, H-6<sup>E</sup>, H-6<sup>F</sup>);  $^{13}\text{C}$  NMR (126 MHz,  $\text{CDCl}_3$ ):  $\delta$  174.0, 137.5, 137.4, 137.3, 137.2, 137.1, 128.7, 128.6 (x3), 128.4 (x2), 128.3 (x2), 128.2 (x2), 128.1 (x2), 128.0 (x2), 127.9, 127.5, 101.0, 100.9, 100.4, 100.2, 98.6, 98.1, 78.0, 77.6, 77.5 (x2), 76.9, 76.4, 74.0, 73.3, 73.1, 72.9, 72.5, 72.4, 72.2, 72.1, 71.9, 70.2, 69.9, 68.1, 67.9 (x2), 67.8, 67.5 (x2), 67.1, 65.8, 64.6, 64.5, 64.4, 64.3, 64.0, 51.5, 33.9, 29.1, 25.7, 24.7, 18.6 (x3), 18.5, 18.4, 18.3 ppm; HRMS (ESI):  $m/z$  calcd for  $\text{C}_{78}\text{H}_{98}\text{N}_{18}\text{O}_{21}\text{Na}$   $[\text{M}+\text{Na}]^+$ : 1645.7046, found: 1645.7035.

**5'-Methoxycarbonylpentyl 4,6-dideoxy-4-formamido- $\alpha$ -D-mannopyranosyl (1 $\rightarrow$ 2) 4,6-dideoxy-4-formamido- $\alpha$ -D-mannopyranosyl (1 $\rightarrow$ 3) 4,6-dideoxy-4-formamido- $\alpha$ -D-mannopyranosyl (1 $\rightarrow$ 2) 4,6-dideoxy-4-formamido- $\alpha$ -D-mannopyranosyl (1 $\rightarrow$ 2) 4,6-dideoxy-4-formamido- $\alpha$ -D-mannopyranoside (5).**

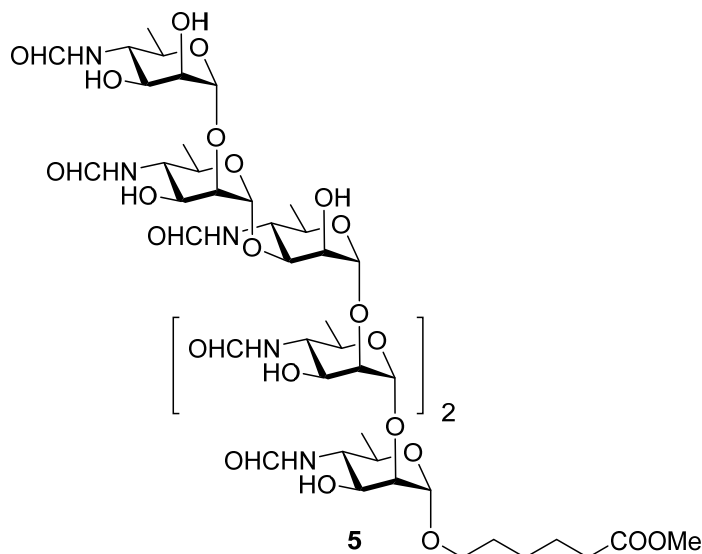

To a stirred solution of **33** (0.150 g, 0.092 mmol), in pyridine (5 mL) and water (2 mL) mixture, H<sub>2</sub>S was bubbled for 0.5 h at 40 °C, and stirring was continued for 16 h. Then argon was bubbled through the solution for 10 min, solvents were removed *in vacuo*, and the residue was co-evaporated with toluene (3 x 10 mL) and dried. The high resolution mass spectrometry analysis showed completion of reaction to corresponding amine compound **33a** and no products arising from incomplete reduction. HRMS (ESI): *m/z* calcd for C<sub>78</sub>H<sub>111</sub>N<sub>6</sub>O<sub>21</sub> [*M*+H]<sup>+</sup>: 1467.7797; found: 1467.7781. This crude material was directly used for formylation.

Compound **33a** in CH<sub>3</sub>OH (5 mL) at -20 °C was added a freshly prepared formic anhydride (5 mL, ethereal solution) and stirred for 3 h, then slowly allowed to warm to 21 °C. Then solvents were evaporated and the residue was passed through column chromatography on silica gel (methanol – dichloromethane gradient elution) to afford disaccharide **33b**. HRMS (ESI): *m/z* calcd for C<sub>84</sub>H<sub>110</sub>N<sub>6</sub>O<sub>27</sub>Na [*M*+Na]<sup>+</sup>: 1657.7311; found: 1657.7314.

Compound **33b** was dissolved in CH<sub>3</sub>OH/H<sub>2</sub>O (2:1, 5 mL), Pd(OH)<sub>2</sub> on carbon (20%, 0.050 g) was added. Then it was stirred under a pressure of hydrogen gas at 21 °C for 16 h. After filtration through celite pad and washed with CH<sub>3</sub>OH (3 x 10 mL), and solvents were removed *in vacuo*. The residue was purified by column chromatography on silica gel

(methanol – dichloromethane gradient elution) to afford the title compound (0.066 g, 60%, over 3 steps) as a white foam. Analytical data for **5**:  $R_f$  = 0.30 (CH<sub>3</sub>OH/CH<sub>2</sub>Cl<sub>2</sub>, 1/1, v/v); <sup>1</sup>H NMR (700 MHz, D<sub>2</sub>O):  $\delta$  8.20-8.25 (*Z*) and 8.02-8.06 (*E*) (m, 6H, NCHO), 4.89-5.23 (m, 6H, 6 x H-1), 3.79-4.22 (m, 23H, 6 x H-2, 6 x H-3, 6 x H-4, 5 x H-5), 3.70-3.74 (m, 4H, -O-CH<sub>2a</sub>-, -OCH<sub>3</sub>), 3.47-3.57 (m, 1H, -O-CH<sub>2b</sub>-), 3.38-3.46 (m, 1H, H-5), 2.42 (t,  $J_{f,e}$  = 7.7 Hz, 2H, -CH<sub>2f</sub>-), 1.58-1.66 (m, 4H, -CH<sub>2e</sub>-, -CH<sub>2c</sub>-), 1.36-1.44 (m, 2H, -CH<sub>2d</sub>-), 1.19-1.31 ppm (m, 18H, 6 x H-6); <sup>13</sup>C NMR (176 MHz, D<sub>2</sub>O):  $\delta$  178.4, 168.6, 165.7 (x2), 165.4 (x2), 103.1, 102.4, 101.5 (x2), 101.3, 99.1 (x2), 78.8, 78.4, 78.2, 78.0, 77.9, 77.6, 77.2, 69.7 (x2), 69.6 (x2), 69.5, 69.1, 69.0, 68.8, 68.7 (x2), 68.6, 68.5, 68.4 (x2), 68.3, 68.2, 67.9, 57.8, 57.7, 57.6, 52.9, 52.8, 52.7, 52.6, 52.5, 51.7, 34.4, 28.9, 25.7, 24.8, 18.0, 17.9, 17.8 (x2), 17.7 (x2), 17.6 (x3), 17.5 ppm; HRMS (ESI):  $m/z$  calcd for C<sub>49</sub>H<sub>80</sub>N<sub>6</sub>O<sub>27</sub>Na [M+Na]<sup>+</sup>: 1207.4964, found: 1207.4963.

**5'-Methoxycarbonylpentyl 4-azido-4,6-dideoxy- $\alpha$ -D-mannopyranosyl (1 $\rightarrow$ 2) 4-azido-3-O-benzyl-4,6-dideoxy- $\alpha$ -D-mannopyranoside (**34**).**

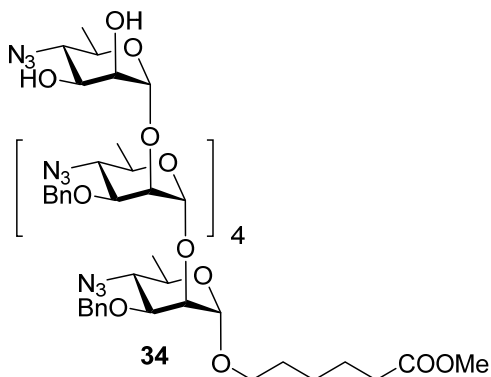

Sodium methoxide (0.8 mL, 0.5 M solution) was added to a solution of **25** (0.483 g, 0.264 mmol) in CH<sub>3</sub>OH (12 mL) until pH ~9 and the resulting mixture was stirred under argon for 6 h at 21 °C. After that, the reaction mixture was neutralized with Amberlite IR 120 (H<sup>+</sup>) ion exchange resin, the resin was filtered off and rinsed successively with CH<sub>3</sub>OH. The combined filtrate was concentrated *in vacuo* and purified by column chromatography on silica gel (ethyl acetate – toluene gradient elution) to afford the title compound (0.375 g, 87%) as oil. Analytical data for **34**:  $R_f$  = 0.30 (ethyl acetate/toluene, 1.5/8.5, v/v);  $[\alpha]_D^{21}$  = +101.4 (c = 1.1,

CHCl<sub>3</sub>); <sup>1</sup>H NMR (500 MHz, CDCl<sub>3</sub>): δ 7.28-7.40 (m, 25H, H-Ar), 4.98 (d, *J*<sub>1,2</sub> = 1.5 Hz, 1H, H-1<sup>F</sup>), 4.90 (d, *J*<sub>1,2</sub> = 1.5 Hz, 1H, H-1<sup>E</sup>), 4.89 (d, *J*<sub>1,2</sub> = 1.5 Hz, 1H, H-1<sup>D</sup>), 4.86 (d, *J*<sub>1,2</sub> = 2.0 Hz, 1H, H-1<sup>C</sup>), 4.85 (d, *J*<sub>1,2</sub> = 2.0 Hz, 1H, H-1<sup>B</sup>), 4.67 (dd, *J*<sup>2</sup> = 11.5 Hz, 2H, CH<sub>2</sub>Ph), 4.56-4.75 (m, 9H, H-1<sup>A</sup>, 4 x CH<sub>2</sub>Ph), 3.93-3.97 (m, 2H, H-2<sup>E</sup>, H-2<sup>F</sup>), 3.83-3.89 (m, 2H, H-2<sup>D</sup>, H-3<sup>F</sup>), 3.82 (dd, *J*<sub>2,3</sub> = 2.0 Hz, 1H, H-2<sup>C</sup>), 3.79 (dd, *J*<sub>2,3</sub> = 3.2 Hz, 1H, H-2<sup>B</sup>), 3.76 (dd, *J*<sub>2,3</sub> = 2.5 Hz, 1H, H-2<sup>A</sup>), 3.73 (dd, *J*<sub>3,4</sub> = 9.9 Hz, 1H, H-3<sup>E</sup>), 3.63-3.70 (m, 7H, H-3<sup>A</sup>, H-3<sup>B</sup>, H-3<sup>C</sup>, H-3<sup>D</sup>, -OCH<sub>3</sub>), 3.52-3.60 (m, 2H, H-5<sup>E</sup>, -O-CH<sub>2a</sub>-), 3.35-3.50 (m, 6H, H-4<sup>F</sup>, H-5<sup>A</sup>, H-5<sup>B</sup>, H-5<sup>C</sup>, H-5<sup>D</sup>, H-5<sup>F</sup>), 3.32 (dt, *J* = 9.7, 6.4 Hz, 1H, -O-CH<sub>2b</sub>-), 3.23-3.29 (m, 2H, H-4<sup>D</sup>, H-4<sup>E</sup>), 3.15-3.22 (m, 3H, H-4<sup>A</sup>, H-4<sup>B</sup>, H-4<sup>C</sup>), 2.41 (d, *J*<sub>2,-OH</sub> = 7.3 Hz, 1H, -OH<sup>F</sup>), 2.32 (t, *J* = 7.8 Hz, 2H, -CH<sub>2c</sub>-), 2.08 (d, *J*<sub>3,-OH</sub> = 4.3 Hz, 1H, -OH<sup>E</sup>), 1.60-1.67 (m, 2H, -CH<sub>2e</sub>-), 1.51-1.56 (m, 2H, -CH<sub>2c</sub>-), 1.29-1.38 (m, 2H, -CH<sub>2d</sub>-), 1.13-1.26 ppm (m, 18H, H-6<sup>A</sup>, H-6<sup>B</sup>, H-6<sup>C</sup>, H-6<sup>D</sup>, H-6<sup>E</sup>, H-6<sup>F</sup>); <sup>13</sup>C NMR (126 MHz, CDCl<sub>3</sub>): δ 174.0, 137.4 (x2), 137.2 (x3), 128.7 (x2), 128.6 (x2), 128.4 (x2), 128.3 (x4), 128.1 (x2), 100.7, 100.4, 100.2 (x2), 100.1, 98.6, 77.5, 76.9, 76.6 (x2), 74.1, 73.6, 73.5, 73.3, 73.2, 72.3 (x2), 72.2 (x2), 70.2, 70.0, 67.9, 67.8 (x2), 67.5, 67.4, 67.1, 65.8, 64.4, 64.3, 64.2, 51.5, 33.9, 29.1, 25.7, 24.7, 18.6 (x2), 18.5 (x3), 18.2 ppm; HRMS (ESI): *m/z* calcd for C<sub>78</sub>H<sub>98</sub>N<sub>18</sub>O<sub>21</sub>Na [M+Na]<sup>+</sup>: 1645.7046, found: 1645.7043.

**5'-Methoxycarbonylpentyl 4,6-dideoxy-4-formamido-α-D-mannopyranosyl (1→2) 4,6-dideoxy-4-formamido-α-D-mannopyranosyl (1→2) 4,6-dideoxy-4-formamido-α-D-mannopyranosyl (1→2) 4,6-dideoxy-4-formamido-α-D-mannopyranosyl (1→2) 4,6-dideoxy-4-formamido-α-D-mannopyranosyl (1→2) 4,6-dideoxy-4-formamido-α-D-mannopyranoside (6).**

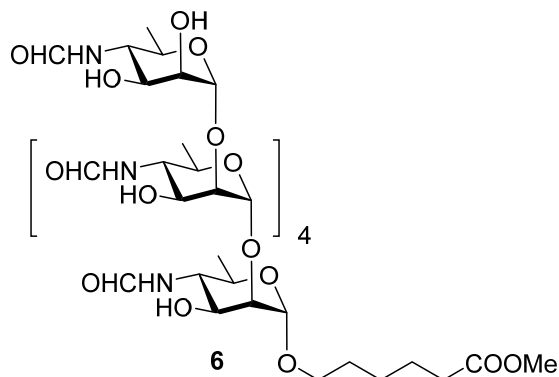

To a stirred solution of **34** (0.130 g, 0.080 mmol), in pyridine (5 mL) and water (2 mL) mixture, H<sub>2</sub>S was bubbled for 0.5 h at 40 °C, and continued stirring for 16 h. After that, argon was bubbled for 10 min, solvents were removed *in vacuo*, and the residue was co-evaporated with toluene (3 x 10 mL) and dried. The high resolution mass spectrometry analysis showed

completion of reaction to corresponding amine compound **34a** and no products arising from incomplete reduction. HRMS (ESI):  $m/z$  calcd for  $C_{78}H_{111}N_6O_{21}$   $[M+H]^+$ : 1467.7797; found: 1467.7795. This crude material was directly used for formylation.

Compound **34a** in  $CH_3OH$  (5 mL) at  $-20\text{ }^{\circ}C$  was added a freshly prepared formic anhydride (5 mL, ethereal solution) and stirred for 3 h, then slowly allowed to warm to  $21\text{ }^{\circ}C$ . After that, solvents were evaporated and the residue was passed through column chromatography on silica gel (methanol – dichloromethane gradient elution) to afford disaccharide **34b**. HRMS (ESI):  $m/z$  calcd for  $C_{84}H_{111}N_6O_{27}Na$   $[M+H]^+$ : 1635.7492; found: 1635.7485.

Compound **34b** was dissolved in  $CH_3OH/H_2O$  (2:1, 5 mL),  $Pd(OH)_2$  on carbon (20%, 0.050 g) was added. Then it was stirred under a pressure of hydrogen gas at  $21\text{ }^{\circ}C$  for 16 h. After filtration through celite pad and washed with  $CH_3OH$  (3 x 10 mL), and solvents were removed *in vacuo*. The residue was purified by column chromatography on silica gel (methanol – dichloromethane gradient elution) to afford the title compound (0.052 g, 55%, over 3 steps) as a white foam. Analytical data for **6**:  $R_f = 0.20$  ( $CH_3OH/CH_2Cl_2$ , 2/3, v/v);  $^1H$  NMR (500 MHz,  $D_2O$ ):  $\delta$  8.17-8.19 (*Z*) and 7.99-8.02 (*E*) (m, 6H, *NCHO*), 4.84-5.20 (m, 6H, 6 x H-1), 3.76-4.17 (m, 24H, 6 x H-2, 6 x H-3, 6 x H-4, 6 x H-5), 3.66-3.72 (m, 4H, -O- $CH_{2a}$ -, -O $CH_3$ ), 3.35-3.56 (m, 1H, -O- $CH_{2b}$ -), 2.39 (t,  $J_{f,e} = 7.4\text{ Hz}$ , 2H, - $CH_{2f}$ -), 1.55-1.65 (m, 4H, - $CH_{2e}$ -, - $CH_{2c}$ -), 1.32-1.41 (m, 2H, - $CH_{2d}$ -), 1.16-1.27 ppm (m, 18H, 6 x H-6);  $^{13}C$  NMR (126 MHz,  $D_2O$ ):  $\delta$  178.5, 168.8, 165.9, 103.0, 102.9, 101.6, 101.5 (x2), 99.2, 78.6, 78.3, 78.1 (x2), 78.0 (x2), 77.9, 69.9 (x2), 69.2 (x2), 69.0, 68.9 (x2), 68.8, 68.7, 68.6 (x2), 68.5 (x3), 57.9, 57.7, 53.1, 53.0, 52.9, 52.8 (x2), 52.7, 49.9, 34.6, 29.0, 25.8, 24.9, 17.9 (x2), 17.8, 17.7 (x2), 17.6 (x2) ppm; HRMS (ESI):  $m/z$  calcd for  $C_{49}H_{80}N_6O_{27}Na$   $[M+Na]^+$ : 1207.4964, found: 1207.4941.



## V. PREPARATION OF GLYCOCONJUGATES

### A. Synthesis of squarate derived oligosaccharides 41-46

(2'-Aminoethylamido)carbonylpentyl 4,6-dideoxy-4-formamido- $\alpha$ -D-mannopyranosyl (1 $\rightarrow$ 3) 4,6-dideoxy-4-formamido- $\alpha$ -D-mannopyranoside (35).

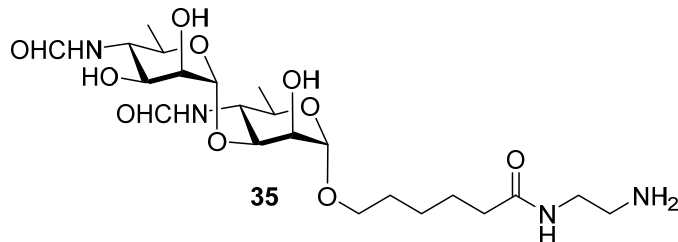

A solution of **1** (0.009g, 0.018 mmol) in freshly distilled 1,2-diaminoethane (0.5 mL) was stirred at 65 °C for 48 h. After that, excess reagent was removed *in vacuo*, and the residue was co-evaporated with CH<sub>3</sub>OH (3 x 10 mL) and dried. The residue was purified by reversed phase HPLC on C18 column in gradient water-acetonitrile and lyophilized, to give the title compound (0.0075 g, 79%) as a white foam. Analytical data for **35**:  $R_f$  = 0.15 (CH<sub>3</sub>OH/CH<sub>2</sub>Cl<sub>2</sub>, 1/1, v/v); <sup>1</sup>H NMR (700 MHz, D<sub>2</sub>O):  $\delta$  8.19-8.22 (*Z*) and 8.01-8.02 (*E*) (m, 2H, NCHO), 4.80-4.95 (m, 2H, 2 x H-1), 3.80-4.04 (m, 8H, 2 x H-2, 2 x H-3, 2 x H-4, 2 x H-5), 3.67-3.74 (m, 1H, -O-CH<sub>2a</sub>-), 3.42-3.56 (m, 1H, -O-CH<sub>2b</sub>-), 3.12-3.32 (m, 2H, -CH<sub>2g</sub>-), 2.71-2.83 (m, 2H, -CH<sub>2h</sub>-), 2.28 (t,  $J_{fe}$  = 7.5 Hz, 2H, -CH<sub>2f</sub>-), 1.58-1.69 (m, 4H, -CH<sub>2e</sub>-, -CH<sub>2c</sub>-), 1.34-1.44 (m, 2H, -CH<sub>2d</sub>-), 1.19-1.30 ppm (m, 6H, 2 x H-6); <sup>13</sup>C NMR (126 MHz, D<sub>2</sub>O):  $\delta$  178.4, 168.9, 168.8, 165.8, 165.7, 103.6, 103.3 (x2), 100.6, 100.5, 77.8, 77.4, 71.1, 70.4, 70.2, 70.0, 69.8, 69.0, 68.9, 68.8 (x3), 68.6, 68.4, 68.2, 67.8, 57.6, 56.5, 54.5, 52.6, 51.8, 51.6, 41.7, 41.4, 40.9, 40.7, 36.7, 29.2, 26.0, 25.9, 17.9, 17.8, 17.7 (x2) ppm; HRMS (ESI):  $m/z$  calcd for C<sub>22</sub>H<sub>40</sub>N<sub>4</sub>O<sub>10</sub>Na [M+Na]<sup>+</sup>: 543.2637, found: 543.2642.

1-[(2'-Aminoethylamido)carbonylpentyl 4,6-dideoxy-4-formamido- $\alpha$ -D-mannopyranosyl (1 $\rightarrow$ 3) 4,6-dideoxy-4-formamido- $\alpha$ -D-mannopyranoside]-2-butoxycyclobutene-3,4-dione (41).

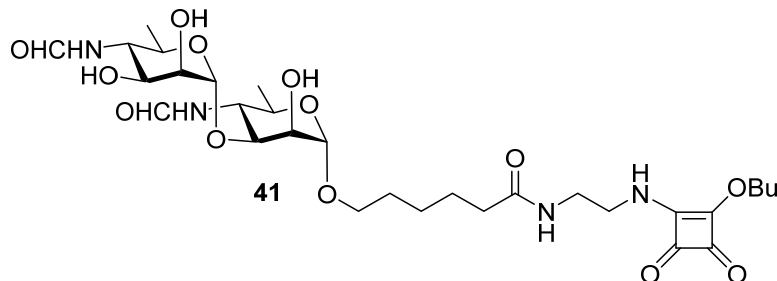

To a stirred solution of **35** (0.0075 g, 0.014 mmol) in water (0.5 mL) and EtOH (0.4 mL), a solution of 3,4-dibutoxy-3-cyclobutene-1,2-dione (20% in ethanol, 70  $\mu$ L) was added and pH was adjusted to 8 by careful addition of aq. NaHCO<sub>3</sub> (1%) solution. After 0.5 h, TLC showed the reaction was complete; the reaction mixture was neutralized using CH<sub>3</sub>COOH (10%) and concentrated *in vacuo*. The residue purified by reversed phase HPLC on C18 column in gradient water-acetonitrile and lyophilized, to give the title compound (0.0089 g, 92%) as a white foam. Analytical data for **41**:  $R_f$  = 0.20 (CH<sub>3</sub>OH/CH<sub>2</sub>Cl<sub>2</sub>, 1.5/8.5, v/v); <sup>1</sup>H NMR (500 MHz, D<sub>2</sub>O):  $\delta$  8.26-8.30 (*Z*) and 8.09-8.12 (*E*) (m, 2H, NCHO), 4.83-5.03 (m, 2H, 2 x H-1), 4.74-4.81 (m, 2H, -CH<sub>2i</sub>-), 3.88-4.10 (m, 8H, 2 x H-2, 2 x H-3, 2 x H-4, 2 x H-5), 3.66-3.82 (m, 3H, -O-CH<sub>2a</sub>-, -CH<sub>2g</sub>-), 3.52-3.61 (m, 1H, -O-CH<sub>2b</sub>-), 3.40-3.52 (m, 2H, -CH<sub>2h</sub>-), 2.26-2.34 (m, 2H, -CH<sub>2f</sub>-), 1.82-1.91 (m, 2H, -CH<sub>2j</sub>-), 1.58-1.70 (m, 4H, -CH<sub>2e</sub>-, -CH<sub>2c</sub>-), 1.47-1.56 (m, 2H, -CH<sub>2k</sub>-), 1.38-1.44 (m, 2H, -CH<sub>2d</sub>-), 1.26-1.37 (m, 6H, 2 x H-6), 0.99-1.05 ppm (m, 3H, -CH<sub>3i</sub>); <sup>13</sup>C NMR (126 MHz, D<sub>2</sub>O):  $\delta$  189.8, 189.6, 184.3 (x2), 178.5, 178.1, 178.0, 177.9, 174.8, 174.7, 168.9, 168.8, 165.8, 165.7, 103.3, 103.2, 100.5 (x2), 77.8, 75.4, 75.3, 70.2, 70.0, 69.9, 69.0, 68.9 (x2), 68.8, 68.7, 68.6, 68.4, 68.2, 67.7, 57.6, 56.5, 52.7, 52.6, 51.7, 45.2, 45.0, 40.3, 40.2, 36.7, 32.4, 31.2, 29.3 (x2), 26.2, 26.1, 25.9 (x2), 19.1, 19.0, 17.8 (x2), 17.7, 13.9 ppm; HRMS (ESI):  $m/z$  calcd for C<sub>30</sub>H<sub>48</sub>N<sub>4</sub>O<sub>13</sub>Na [M+Na]<sup>+</sup>: 695.3110, found: 695.3113.

**(2'-Aminoethylamido)carbonylpentyl 4,6-dideoxy-4-formamido- $\alpha$ -D-mannopyranosyl (1 $\rightarrow$ 2) 4,6-dideoxy-4-formamido- $\alpha$ -D-mannopyranosyl (1 $\rightarrow$ 3) 4,6-dideoxy-4-formamido- $\alpha$ -D-mannopyranoside (36).**

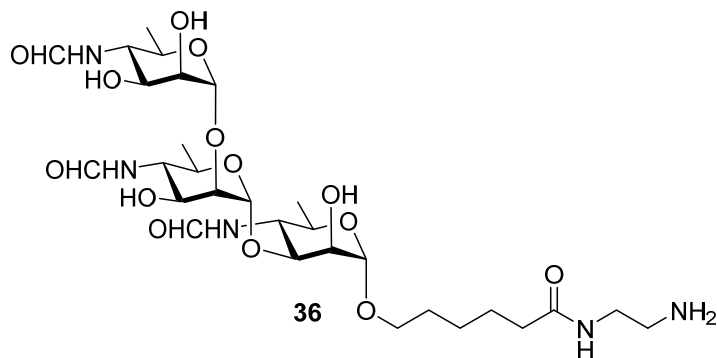

A solution of **2** (0.012g, 0.018 mmol) in freshly distilled 1,2-diaminoethane (0.5 mL) was stirred at 65 °C for 48 h. After that, excess reagent was removed *in vacuo*, and the residue was co-evaporated with CH<sub>3</sub>OH (3 x 10 mL) and dried. The residue was purified by reversed phase HPLC on C18 column in gradient water-acetonitrile and lyophilized, to give the title

compound (0.0112 g, 90%) as a white foam. Analytical data for **36**:  $R_f$  = 0.10 (CH<sub>3</sub>OH/CH<sub>2</sub>Cl<sub>2</sub>, 1/1, v/v); <sup>1</sup>H NMR (500 MHz, D<sub>2</sub>O): δ 8.26-8.31 (*Z*) and 8.08-8.13 (*E*) (m, 3H, NCHO), 4.88-5.16 (m, 3H, 3 x H-1), 3.88-4.20 (m, 12H, 3 x H-2, 3 x H-3, 3 x H-4, 3 x H-5), 3.75-3.82 (m, 1H, -O-CH<sub>2a</sub>-), 3.44-3.64 (m, 1H, -O-CH<sub>2b</sub>-), 3.18-3.39 (m, 2H, -CH<sub>2g</sub>-), 2.86-3.08 (m, 2H, -CH<sub>2h</sub>-), 2.30-2.37 (m, 2H, -CH<sub>2f</sub>-), 1.64-1.74 (m, 4H, -CH<sub>2e</sub>-, -CH<sub>2c</sub>-), 1.40-1.48 (m, 2H, -CH<sub>2d</sub>-), 1.20-1.37 (m, 9H, 3 x H-6); <sup>13</sup>C NMR (126 MHz, D<sub>2</sub>O): δ 178.4, 178.2, 168.8 (x2), 165.9, 165.8, 165.6 (x3), 103.3 (x2), 101.7 (x2), 100.5 (x2), 79.0, 77.7, 70.0, 69.9, 69.2, 69.0, 68.9, 68.8, 68.6, 68.4, 68.0, 67.7, 57.8, 57.7, 52.8, 52.7, 51.9, 41.5 (x2), 41.5, 41.4, 40.9, 40.6 (x2), 36.6, 29.2, 26.0 (x2), 25.9, 25.8, 18.1, 18.0, 17.9 (x3), 17.7 ppm; HRMS (ESI):  $m/z$  calcd for C<sub>29</sub>H<sub>51</sub>N<sub>5</sub>O<sub>14</sub>Na [M+Na]<sup>+</sup>: 716.3325, found: 716.3311.

**1-[(2'-Aminoethylamido)carbonylpentyl 4,6-dideoxy-4-formamido- $\alpha$ -D-mannopyranosyl (1 $\rightarrow$ 2) 4,6-dideoxy-4-formamido- $\alpha$ -D-mannopyranosyl (1 $\rightarrow$ 3) 4,6-dideoxy-4-formamido- $\alpha$ -D-mannopyranoside]-2-butoxycyclobutene-3,4-dione (**42**).**

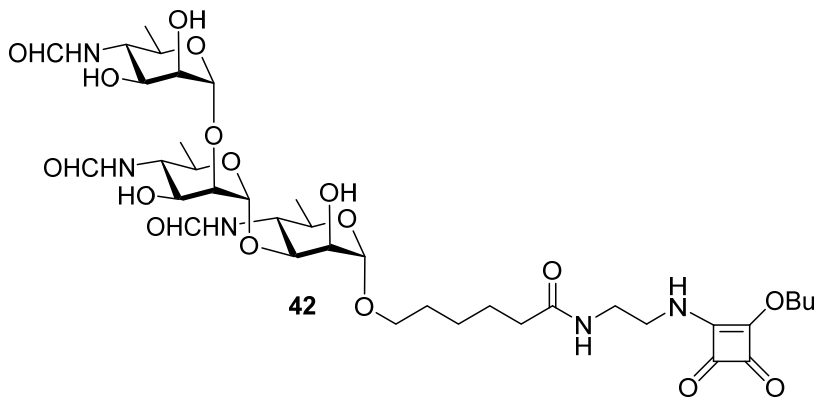

To a stirred solution of **36** (0.0075 g, 0.011 mmol) in water (0.5 mL) and EtOH (0.4 mL), a solution of 3,4-dibutoxy-3-cyclobutene-1,2-dione (20% in ethanol, 50  $\mu$ L) was added and pH was adjusted to 8 by careful addition of aq.NaHCO<sub>3</sub> (1%) solution. After 0.5 h, TLC showed the reaction was complete; the reaction mixture was neutralized using CH<sub>3</sub>COOH (10%) and concentrated *in vacuo*. The residue was purified by reversed phase HPLC on C18 column in gradient water-acetonitrile and lyophilized, to give the title compound (0.0065 g, 71%) as a white foam. Analytical data for **42**:  $R_f$  = 0.20 (CH<sub>3</sub>OH/CH<sub>2</sub>Cl<sub>2</sub>, 1/4, v/v); <sup>1</sup>H NMR (500 MHz, D<sub>2</sub>O): δ 8.27-8.31 (*Z*) and 8.08-8.13 (*E*) (m, 3H, NCHO), 4.86-5.15 (m, 3H, 3 x H-1), 4.74-4.81 (m, 2H, -CH<sub>2i</sub>-), 3.90-4.20 (m, 12H, 3 x H-2, 3 x H-3, 3 x H-4, 3 x H-5), 3.66-3.82 (m, 3H, -O-CH<sub>2a</sub>-, -CH<sub>2g</sub>-), 3.52-3.61 (m, 1H, -O-CH<sub>2b</sub>-), 3.43-3.51 (m, 2H, -CH<sub>2h</sub>-), 2.25-2.33 (m, 2H, -CH<sub>2f</sub>-), 1.82-1.91 (m, 2H, -CH<sub>2j</sub>-), 1.57-1.70 (m, 4H, -CH<sub>2e</sub>-, -CH<sub>2c</sub>-), 1.46-1.56

(m, 2H,  $-CH_{2k-}$ ), 1.37-1.44 (m, 2H,  $-CH_{2d-}$ ), 1.26-1.36 (m, 9H, 3 x H-6), 0.98-1.05 ppm (m, 3H,  $-CH_3$ );  $^{13}\text{C}$  NMR (126 MHz,  $\text{D}_2\text{O}$ ):  $\delta$  189.8, 189.6, 184.3 (x2), 178.5, 178.1, 178.0, 177.9, 174.8, 174.7, 168.8, 168.7, 165.8 (x2), 165.6, 103.4, 103.3, 102.9, 101.8, 101.7, 100.6, 100.5, 79.0, 78.9, 78.8, 78.2, 78.0, 77.7 (x2), 75.4, 75.3, 70.0, 69.9, 69.3, 69.2, 69.0, 68.9, 68.9, 68.8, 68.6, 68.5 (x2), 68.4, 68.3, 67.9, 67.7, 57.8, 57.7, 56.5, 52.8, 52.8, 52.7, 51.9, 45.2, 45.0, 40.3, 40.2, 36.7, 32.4, 29.3 (x2), 26.2, 26.1, 25.9 (x2), 19.1, 19.0, 18.1, 18.0, 17.9 (x3), 17.7, 13.9 ppm; HRMS (ESI):  $m/z$  calcd for  $\text{C}_{37}\text{H}_{59}\text{N}_5\text{O}_{17}\text{Na}$   $[\text{M}+\text{Na}]^+$ : 868.3798, found: 868.3800.

**(2'-Aminoethylamido)carbonylpentyl 4,6-dideoxy-4-formamido- $\alpha$ -D-mannopyranosyl (1 $\rightarrow$ 3) 4,6-dideoxy-4-formamido- $\alpha$ -D-mannopyranosyl (1 $\rightarrow$ 2) 4,6-dideoxy-4-formamido- $\alpha$ -D-mannopyranoside (37).**

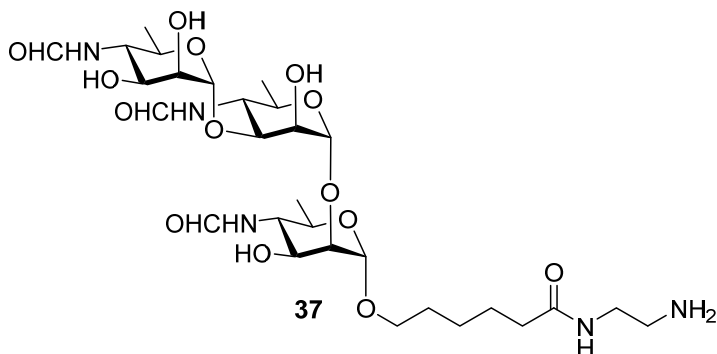

A solution of **3** (0.010g, 0.015 mmol) in freshly distilled 1,2-diaminoethane (0.5 mL) was stirred at 65 °C for 48 h. After that, excess reagent was removed *in vacuo*, and the residue was co-evaporated with  $\text{CH}_3\text{OH}$  (3 x 10 mL) and dried. The residue was purified by reversed phase HPLC on C18 column in gradient water-acetonitrile and lyophilized, to give the title compound (0.0084 g, 81%) as a white foam. Analytical data for **37**:  $R_f$  = 0.10 ( $\text{CH}_3\text{OH}/\text{CH}_2\text{Cl}_2$ , 1/1, v/v);  $^1\text{H}$  NMR (500 MHz,  $\text{D}_2\text{O}$ ):  $\delta$  8.26-8.31 (*Z*) and 8.09-8.13 (*E*) (m, 3H,  $\text{NCHO}$ ), 4.98 - 5.11 (m, 3H, 3 x H-1), 3.83-4.29 (m, 12H, 3 x H-2, 3 x H-3, 3 x H-4, 3 x H-5), 3.74-3.82 (m, 1H,  $-\text{O}-\text{CH}_{2a-}$ ), 3.50-3.65 (m, 1H,  $-\text{O}-\text{CH}_{2b-}$ ), 3.18-3.47 (m, 2H,  $-\text{CH}_{2g-}$ ), 3.02 (t,  $J_{h,g}$  = 5.8 Hz, 2H,  $-\text{CH}_{2h-}$ ), 2.31-2.39 (m, 2H,  $-\text{CH}_{2f-}$ ), 1.64-1.75 (m, 4H,  $-\text{CH}_{2e-}$ ,  $-\text{CH}_{2c-}$ ), 1.40-1.50 (m, 2H,  $-\text{CH}_{2d-}$ ), 1.26-1.38 ppm (m, 9H, 3 x H-6);  $^{13}\text{C}$  NMR (126 MHz,  $\text{D}_2\text{O}$ ):  $\delta$  178.6, 178.1, 168.9, 168.8, 168.7, 165.8, 165.7, 165.6, 161.6, 103.3, 103.1 (x2), 103.1, 102.9, 99.2 (x2), 78.8 (x3), 77.8, 77.5, 77.4, 77.3, 77.1, 71.0, 70.8, 70.4, 70.2, 70.0, 69.8, 69.7, 69.6, 69.1, 69.0, 68.9 (x2), 68.8 (x2), 68.7 (x2), 68.6, 68.5 (x2), 68.0, 57.9, 57.6, 56.5, 54.5, 53.0, 52.7, 52.6, 51.6, 51.5, 41.4, 40.9, 40.4, 40.0, 36.7, 36.6, 29.1, 26.0, 25.9,

25.8, 18.0, 17.8, 17.7, 17.6 ppm; HRMS (ESI):  $m/z$  calcd for  $C_{29}H_{51}N_5O_{14}Na$   $[M+Na]^+$ : 716.3325, found: 716.3322.

**1-[(2'-Aminoethylamido)carbonylpentyl 4,6-dideoxy-4-formamido- $\alpha$ -D-mannopyranosyl (1 $\rightarrow$ 3) 4,6-dideoxy-4-formamido- $\alpha$ -D-mannopyranosyl (1 $\rightarrow$ 2) 4,6-dideoxy-4-formamido- $\alpha$ -D-mannopyranoside]-2-butoxycyclobutene-3,4-dione (43).**

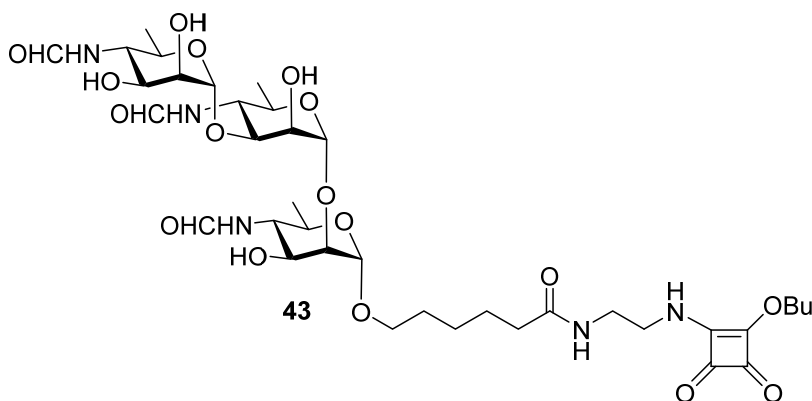

To a stirred solution of **37** (0.0074 g, 0.0106 mmol) in water (0.5 mL) and EtOH (0.4 mL), a solution of 3,4-dibutoxy-3-cyclobutene-1,2-dione (20% in ethanol, 50  $\mu$ L) was added and pH was adjusted to 8 by careful addition of aq.  $NaHCO_3$  (1%) solution. After 0.5 h, TLC showed the reaction was complete; the reaction mixture was neutralized using  $CH_3COOH$  (10%) and concentrated *in vacuo*. The residue was purified by reversed phase HPLC on C18 column in gradient water-acetonitrile and lyophilized, to give the title compound (0.0072 g, 80%) as a white foam. Analytical data for **43**:  $R_f$  = 0.20 ( $CH_3OH/CH_2Cl_2$ , 1/4, v/v);  $^1H$  NMR (500 MHz,  $D_2O$ ):  $\delta$  8.16-8.21 (*Z*) and 7.99-8.03 (*E*) (m, 3H,  $NCHO$ ), 4.87-5.01 (m, 3H, 3 x H-1), 4.64-4.73 (m, 2H,  $-CH_{2i-}$ ), 3.75-4.18 (m, 12H, 3 x H-2, 3 x H-3, 3 x H-4, 3 x H-5), 3.55-3.71 (m, 3H,  $-O-CH_{2a-}$ ,  $-CH_{2g-}$ ), 3.44-3.51 (m, 1H,  $-O-CH_{2b-}$ ), 3.31-3.42 (m, 2H,  $-CH_{2h-}$ ), 2.16-2.24 (m, 2H,  $-CH_{2f-}$ ), 1.72-1.81 (m, 2H,  $-CH_{2j-}$ ), 1.47-1.61 (m, 4H,  $-CH_{2e-}$ ,  $-CH_{2c-}$ ), 1.36-1.46 (m, 2H,  $-CH_{2k-}$ ), 1.27-1.34 (m, 2H,  $-CH_{2d-}$ ), 1.18-1.27 (m, 9H, 3 x H-6), 0.86-0.95 ppm (m, 3H,  $-CH_{3l}$ );  $^{13}C$  NMR (126 MHz,  $D_2O$ ):  $\delta$  189.8, 189.6, 184.2, 178.5, 178.0, 177.9 (x2), 174.8, 174.7, 168.8, 168.7, 166.6, 165.8, 165.7, 103.1, 102.8, 99.1 (x2), 78.7, 77.4 (x2), 75.4, 75.3, 70.2, 69.7, 69.6, 69.1, 69.0, 68.9, 68.7 (x3), 68.5, 68.4, 53.0, 52.6, 51.5, 45.1, 44.9, 40.3, 40.1, 36.7, 32.4, 29.2, 26.1, 26.0, 25.9 (x2), 19.0 (x2), 17.8 (x3), 17.6, 13.9 ppm; HRMS (ESI):  $m/z$  calcd for  $C_{37}H_{59}N_5O_{17}Na$   $[M+Na]^+$ : 868.3798, found: 868.3791.

Chemical structure of compound 38, a branched oligosaccharide. It features a central glucose unit linked to three other glucose units. The top-left branch consists of a glucose unit linked to a mannose unit. The bottom branch consists of a glucose unit linked to a mannose unit. The rightmost branch is a glucose unit linked to a mannose unit. The terminal mannose unit on the right is linked to a 6-aminohexanoate group via an amide bond.

S50

1-[(2'-Aminoethylamido)carbonylpentyl 4,6-dideoxy-4-formamido- $\alpha$ -D-mannopyranosyl (1 $\rightarrow$ 2) 4,6-dideoxy-4-formamido- $\alpha$ -D-mannopyranosyl (1 $\rightarrow$ 3) 4,6-dideoxy-4-formamido- $\alpha$ -D-mannopyranosyl (1 $\rightarrow$ 2) 4,6-dideoxy-4-formamido- $\alpha$ -D-mannopyranoside]-2-butoxycyclobutene-3,4-dione (**44**).

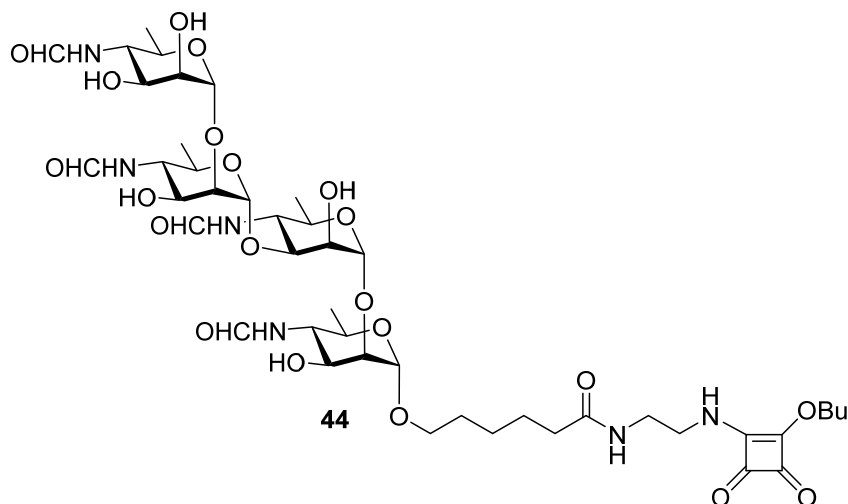

To a stirred solution of **38** (0.013 g, 0.015 mmol) in water (0.5 mL) and EtOH (0.4 mL), a solution of 3,4-dibutoxy-3-cyclobutene-1,2-dione (20% in ethanol, 70  $\mu$ L) was added and pH was adjusted to 8 by careful addition of aq. NaHCO<sub>3</sub> (1%) solution. After 0.5 h, TLC showed the reaction was complete; the reaction mixture was neutralized using CH<sub>3</sub>COOH (10%) and concentrated *in vacuo*. The residue was purified by reversed phase HPLC on C18 column in gradient water-acetonitrile and lyophilized, to give the title compound (0.0109 g, 72%) as a white foam. Analytical data for **44**:  $R_f$  = 0.20 (CH<sub>3</sub>OH/CH<sub>2</sub>Cl<sub>2</sub>, 1/4, v/v); <sup>1</sup>H NMR (600 MHz, D<sub>2</sub>O):  $\delta$  8.18-8.24 (*Z*) and 7.98-8.06 (*E*) (m, 4H, NCHO), 4.90-5.10 (m, 4H, 4 x H-1), 4.65-4.73 (m, 2H, -CH<sub>2i</sub>-), 3.76-4.20 (m, 16H, 4 x H-2, 4 x H-3, 4 x H-4, 4 x H-5), 3.57-3.73 (m, 3H, -O-CH<sub>2a</sub>-, -CH<sub>2g</sub>-), 3.45-3.52 (m, 1H, -O-CH<sub>2b</sub>-), 3.36-3.43 (m, 2H, -CH<sub>2h</sub>-), 2.18-2.25 (m, 2H, -CH<sub>2f</sub>-), 1.74-1.82 (m, 2H, -CH<sub>2j</sub>-), 1.49-1.63 (m, 4H, -CH<sub>2e</sub>-, -CH<sub>2c</sub>-), 1.38-1.48 (m, 2H, -CH<sub>2k</sub>-), 1.20-1.35 (m, 14H, -CH<sub>2d</sub>-, 4 x H-6), 0.87-0.96 ppm (m, 3H, -CH<sub>3l</sub>); <sup>13</sup>C NMR (126 MHz, D<sub>2</sub>O):  $\delta$  189.8, 189.6, 184.3 (x2), 178.5, 178.2, 178.1, 178.0, 177.9, 174.8, 174.7, 168.8, 168.7, 168.6, 165.8, 165.6, 103.3 (x2), 103.2, 102.8 (x2), 102.7, 101.7 (x2), 101.6 (x2), 99.2, 78.9 (x2), 78.4, 78.1, 77.3, 75.4, 75.3, 69.9 (x2), 69.8 (x2), 69.7, 69.3, 69.0 (x2), 68.9, 68.8 (x4), 68.6 (x2), 68.5, 68.4 (x2), 68.0, 62.5, 52.9, 52.8 (x2), 52.7, 51.8, 45.2, 45.0, 44.2, 40.6, 40.3, 40.2, 36.7, 34.4, 32.4, 29.2, 26.2, 26.1, 26.0 (x2), 25.9 (x2), 25.8, 19.3, 19.1, 19.0, 18.1, 18.0 (x2), 17.9, 17.8 (x2), 17.7 (x2), 14.0, 13.9 ppm; HRMS (ESI):  $m/z$  calcd for C<sub>44</sub>H<sub>70</sub>N<sub>6</sub>O<sub>21</sub>Na [M+Na]<sup>+</sup>: 1041.4486, found: 1041.4484.

(2'-Aminoethylamido)carbonylpentyl 4,6-dideoxy-4-formamido- $\alpha$ -D-mannopyranosyl (1 $\rightarrow$ 2) 4,6-dideoxy-4-formamido- $\alpha$ -D-mannopyranosyl (1 $\rightarrow$ 3) 4,6-dideoxy-4-formamido- $\alpha$ -D-mannopyranosyl (1 $\rightarrow$ 2) 4,6-dideoxy-4-formamido- $\alpha$ -D-mannopyranosyl (1 $\rightarrow$ 2) 4,6-dideoxy-4-formamido- $\alpha$ -D-mannopyranosyl (1 $\rightarrow$ 2) 4,6-dideoxy-4-formamido- $\alpha$ -D-mannopyranoside (**39**).

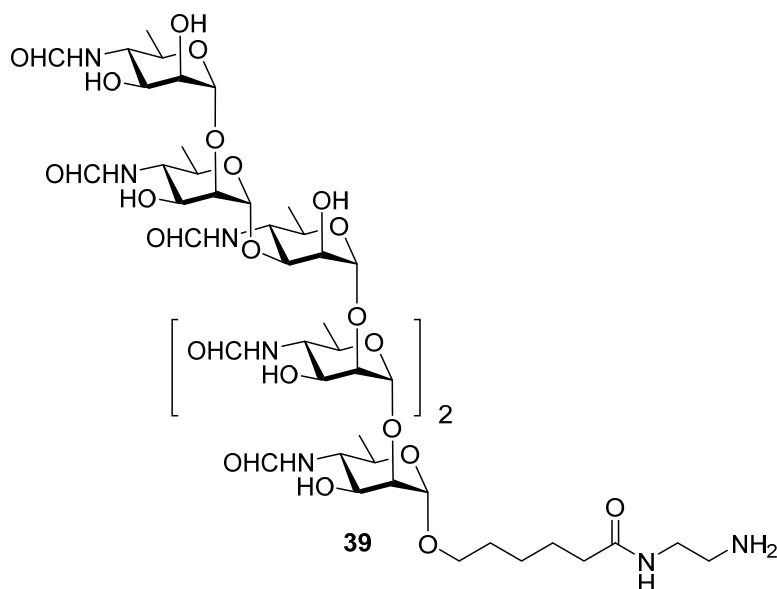

A solution of **5** (0.041 g, 0.035 mmol) in freshly distilled 1,2-diaminoethane (0.5 mL) was stirred at 21 °C for 48 h. Then excess reagent was removed *in vacuo*, and the residue was co-evaporated with CH<sub>3</sub>OH (3 x 10 mL) and dried. The residue was purified by reversed phase HPLC on a C18 column with a gradient of water-acetonitrile and lyophilized, to give the title compound (0.039 g, 93%) as a white foam. Analytical data for **39**: *R<sub>f</sub>* = 0.20 (CH<sub>3</sub>OH); <sup>1</sup>H NMR (500 MHz, D<sub>2</sub>O):  $\delta$  8.15-8.20 (*Z*) and 7.95-8.02 (*E*) (m, 6H, NCHO), 4.82-5.18 (m, 6H, 6 x H-1), 3.73-4.17 (m, 23H, 6 x H-2, 6 x H-3, 6 x H-4, 5 x H-5), 3.63-3.69 (m, 1H, -O-CH<sub>2a</sub>-), 3.47-3.53 (m, 1H, -O-CH<sub>2b</sub>-), 3.31-3.46 (m, 1H, H-5), 3.08-3.25 (m, 2H, -CH<sub>2g</sub>-), 2.72-2.77 (m, 2H, -CH<sub>2h</sub>-), 2.20-2.25 (m, 2H, -CH<sub>2f</sub>-), 1.53-1.63 (m, 4H, -CH<sub>2e</sub>-, -CH<sub>2c</sub>-), 1.28-1.38 (m, 2H, -CH<sub>2d</sub>-), 1.13-1.28 ppm (m, 18H, 6 x H-6); <sup>13</sup>C NMR (126 MHz, D<sub>2</sub>O):  $\delta$  178.4, 178.1, 168.8 (x2), 165.9, 165.6, 103.3 (x2), 102.6, 101.9, 101.8, 101.6, 101.5, 99.3, 99.2, 78.9, 78.6, 78.5, 78.1, 77.8, 77.4, 71.0, 69.9 (x2), 69.7 (x2), 69.6, 69.4, 69.2, 69.0, 69.0, 68.9, 68.8, 68.6 (x2), 68.5 (x2), 68.4, 68.0, 57.9 (x2), 57.8, 57.7, 56.4, 53.0, 52.8 (x2), 52.7, 51.8, 41.4, 41.1, 40.6, 36.6, 29.1, 26.0, 25.9 (x2), 18.1 (x3), 18.0, 17.9, 17.8, 17.7, 17.6 ppm; HRMS (ESI): *m/z* calcd for C<sub>50</sub>H<sub>85</sub>N<sub>8</sub>O<sub>26</sub> [M+H]<sup>+</sup>: 1213.5570, found: 1213.5564.



1-[(2'-Aminoethylamido)carbonylpentyl 4,6-dideoxy-4-formamido- $\alpha$ -D-mannopyranosyl (1 $\rightarrow$ 2) 4,6-dideoxy-4-formamido- $\alpha$ -D-mannopyranosyl (1 $\rightarrow$ 3) 4,6-dideoxy-4-formamido- $\alpha$ -D-mannopyranosyl (1 $\rightarrow$ 2) 4,6-dideoxy-4-formamido- $\alpha$ -D-mannopyranosyl (1 $\rightarrow$ 2) 4,6-dideoxy-4-formamido- $\alpha$ -D-mannopyranosyl (1 $\rightarrow$ 2) 4,6-dideoxy-4-formamido- $\alpha$ -D-mannopyranoside]-2-butoxycyclobutene-3,4-dione (**45**).

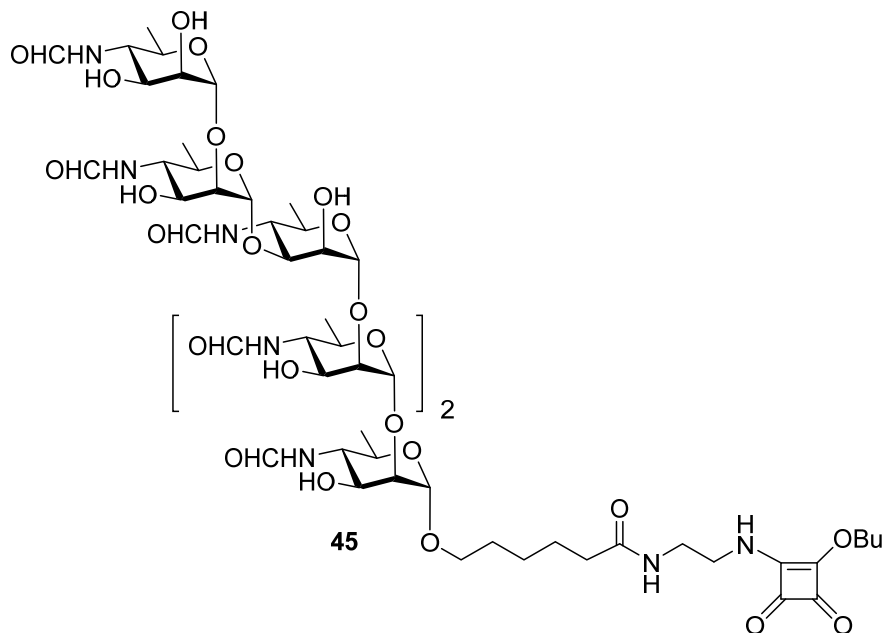

To a stirred solution of **39** (0.014 g, 0.011 mmol) in water (0.8 mL) and EtOH (0.6 mL), a solution of 3,4-dibutoxy-3-cyclobutene-1,2-dione (20% in ethanol, 55  $\mu$ L) was added and the pH was adjusted to 8 by careful addition of aq. NaHCO<sub>3</sub> (1%) solution. After 0.5 h, TLC showed the reaction was complete; the reaction mixture was neutralized using CH<sub>3</sub>COOH (10%) and concentrated *in vacuo*. The residue was purified by reversed phase HPLC on a C18 column with a gradient of water-acetonitrile and lyophilized, to give the title compound (0.012 g, 76%) as a white foam. Analytical data for **45**: R<sub>f</sub> = 0.40 (CH<sub>3</sub>OH/CH<sub>2</sub>Cl<sub>2</sub>, 1/1, v/v); <sup>1</sup>H NMR (700 MHz, D<sub>2</sub>O):  $\delta$  8.14-8.20 (*Z*) and 7.96-8.02 (*E*) (m, 6H, NCHO), 4.83-5.18 (m, 6H, 6 x H-1), 4.62-4.69 (m, 2H, -CH<sub>2i</sub>-), 3.72-4.17 (m, 24H, 6 x H-2, 6 x H-3, 6 x H-4, 6 x H-5), 3.66-3.69 (m, 1H, -CH<sub>2g</sub>-), 3.60-3.65 (m, 1H, -O-CH<sub>2a</sub>-), 3.55-3.58 (m, 1H, -CH<sub>2g</sub>-), 3.42-3.48 (m, 1H, -O-CH<sub>2b</sub>-), 3.32-3.41 (m, 2H, -CH<sub>2h</sub>-), 2.14-2.21 (m, 2H, -CH<sub>2f</sub>-), 1.71-1.79 (m, 2H, -CH<sub>2j</sub>-), 1.46-1.60 (m, 4H, -CH<sub>2e</sub>-, -CH<sub>2c</sub>-), 1.36-1.44 (m, 2H, -CH<sub>2k</sub>-), 1.15-1.30 (m, 20H, -CH<sub>2d</sub>-, 6 x H-6), 0.88-0.93 ppm (m, 3H, -CH<sub>3l</sub>); <sup>13</sup>C NMR (126 MHz, D<sub>2</sub>O):  $\delta$  189.8, 189.7, 184.3, 178.5, 178.1, 177.9 (x2), 174.8, 174.7, 168.8, 165.9, 165.6, 103.3, 102.6, 101.6, 101.5, 99.2, 78.9, 78.5, 78.2, 77.8, 77.3, 75.4, 75.3, 70.8, 69.9, 69.7, 69.2, 69.0, 68.8,

68.7, 68.6, 68.5, 68.4, 57.9, 57.7, 53.0, 52.8, 52.7, 51.8, 45.2, 45.0, 40.3, 40.2, 36.7, 32.4, 29.2, 26.1, 26.0, 25.9 (x2), 19.1, 19.0, 18.1, 18.0, 17.9 (x2), 17.8, 17.7, 13.9 ppm; HRMS (ESI):  $m/z$  calcd for  $C_{58}H_{92}N_8O_{29}Na$   $[M+Na]^+$ : 1387.5862, found: 1387.5864.

**(2'-Aminoethylamido)carbonylpentyl 4,6-dideoxy-4-formamido- $\alpha$ -D-mannopyranosyl (1 $\rightarrow$ 2) 4,6-dideoxy-4-formamido- $\alpha$ -D-mannopyranoside (40).**

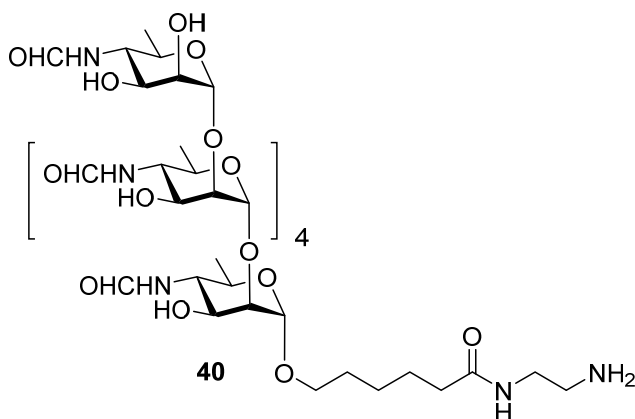

A solution of **6** (0.034 g, 0.029 mmol) in freshly distilled 1,2-diaminoethane (0.5 mL) was stirred at 21 °C for 48 h. After that, excess reagent was removed *in vacuo*, and the residue was co-evaporated with  $CH_3OH$  (3 x 10 mL) and dried. The residue was purified by reversed phase HPLC on C18 column in gradient water-acetonitrile and lyophilized, to give the title compound (0.034 g, 97%) as a white foam. Analytical data for **40**:  $R_f$  = 0.20 ( $CH_3OH$ );  $^1H$  NMR (500 MHz,  $D_2O$ ):  $\delta$  8.16-8.19 (*Z*) and 7.98-8.02 (*E*) (m, 6H,  $NCHO$ ), 4.81-5.19 (m, 6H, 6 x H-1), 3.64-4.18 (m, 25H, 6 x H-2, 6 x H-3, 6 x H-4, 6 x H-5,  $-O-CH_{2a-}$ ), 3.32-3.55 (m, 1H,  $-O-CH_{2b-}$ ), 3.08-3.27 (m, 2H,  $-CH_{2g-}$ ), 2.70-2.79 (m, 2H,  $-CH_{2h-}$ ), 2.22-2.27 (m, 2H,  $-CH_{2f-}$ ), 1.55-1.65 (m, 4H,  $-CH_{2e-}$ ,  $-CH_{2c-}$ ), 1.28-1.40 (m, 2H,  $-CH_{2d-}$ ), 1.14-1.26 ppm (m, 18H, 6 x H-6);  $^{13}C$  NMR (126 MHz,  $D_2O$ ):  $\delta$  178.3, 178.1, 168.8, 168.7, 165.8, 103.4, 103.0 (x2), 102.9, 102.0, 101.7, 101.6, 101.5, 99.5, 99.3, 99.2, 78.7, 78.6, 78.3, 78.2, 78.1(x2), 78.0, 77.7, 71.3, 71.2, 71.0, 70.9, 70.4, 70.2, 69.9, 69.2, 69.0, 68.9 (x2), 68.8, 68.7, 68.7, 68.6 (x2), 68.5 (x3), 68.0, 57.9, 57.8, 57.7, 54.8, 54.8, 54.5, 53.0, 52.8, 52.6, 41.8, 41.4, 40.9, 40.7, 36.7, 29.1, 26.0, 25.9 (x2), 18.0, 17.9 (x2), 17.8, 17.7, 17.6 ppm; HRMS (ESI):  $m/z$  calcd for  $C_{50}H_{84}N_8O_{26}Na$   $[M+Na]^+$ : 1235.5389, found: 1235.5384.

**1-[(2'-Aminoethylamido)carbonylpentyl 4,6-dideoxy-4-formamido- $\alpha$ -D-mannopyranosyl (1 $\rightarrow$ 2) 4,6-dideoxy-4-formamido- $\alpha$ -D-mannopyranoside]-2-butoxycyclobutene-3,4-dione (**46**).**

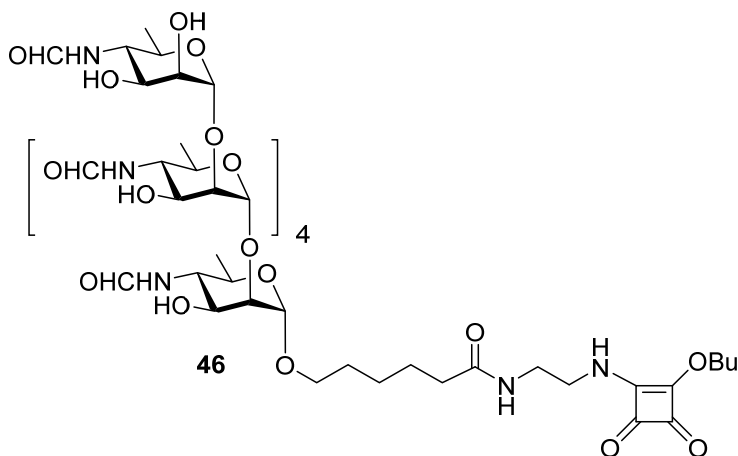

To a stirred solution of **40** (0.0142 g, 0.012 mmol) in water (0.5 mL) and EtOH (0.4 mL), a solution of 3,4-dibutoxy-3-cyclobutene-1,2-dione (20% in ethanol, 55  $\mu$ L) was added and pH was adjusted to 8 by careful addition of aq. NaHCO<sub>3</sub> (1%) solution. After 0.5 h, TLC showed the reaction was complete; the reaction mixture was neutralized using CH<sub>3</sub>COOH (10%) and concentrated *in vacuo*. The residue was purified by reversed phase HPLC on C18 column in gradient water-acetonitrile and lyophilized, to give the title compound (0.014 g, 88%) as a white foam. Analytical data for **46**: *R<sub>f</sub>* = 0.40 (CH<sub>3</sub>OH/CH<sub>2</sub>Cl<sub>2</sub>, 1/1, v/v); <sup>1</sup>H NMR (700 MHz, D<sub>2</sub>O):  $\delta$  8.14-8.19 (*Z*) and 7.97-8.01 (*E*) (m, 6H, NCHO), 4.82-5.18 (m, 6H, 6 x H-1), 4.62-4.70 (m, 2H, -CH<sub>2i</sub>-), 3.72-4.15 (m, 24H, 6 x H-2, 6 x H-3, 6 x H-4, 6 x H-5), 3.66-3.69 (m, 1H, -CH<sub>2g</sub>-), 3.60-3.65 (m, 1H, -O-CH<sub>2a</sub>-), 3.55-3.58 (m, 1H, -CH<sub>2g</sub>-), 3.42-3.48 (m, 1H, -O-CH<sub>2b</sub>-), 3.31-3.41 (m, 2H, -CH<sub>2h</sub>-), 2.14-2.21 (m, 2H, -CH<sub>2f</sub>-), 1.71-1.79 (m, 2H, -CH<sub>2j</sub>-), 1.46-1.59 (m, 4H, -CH<sub>2e</sub>-, -CH<sub>2c</sub>-), 1.35-1.44 (m, 2H, -CH<sub>2k</sub>-), 1.14-1.31 (m, 20H, -CH<sub>2d</sub>-, 6 x H-6), 0.87-0.93 ppm (m, 3H, -CH<sub>3l</sub>); <sup>13</sup>C NMR (126 MHz, D<sub>2</sub>O):  $\delta$  189.8, 189.6, 184.3, 178.5, 178.1, 177.9 (x2), 174.8, 174.7, 168.8, 165.9, 102.9, 101.5 (x3), 99.2 (x2), 78.5, 78.1(x2), 78.0, 75.4, 75.3, 71.4, 69.9, 69.2, 69.0, 68.9, 68.7, 68.6, 68.0, 57.8 (x2), 53.0, 52.9 (x2), 52.7, 45.2, 45.0, 40.3, 40.2, 36.7, 32.4, 32.3, 32.2, 29.2, 26.1(x2), 25.9 (x2), 19.1, 19.0, 17.9 (x2), 17.8 (x2), 17.7, 13.9, 13.8 ppm; HRMS (ESI): *m/z* calcd for C<sub>58</sub>H<sub>92</sub>N<sub>8</sub>O<sub>29</sub>Na [M+Na]<sup>+</sup>: 1387.5862, found: 1387.5856.

### **B. Protein conjugation**

*Preparation of BSA conjugate 47.* BSA (30 mg, 0.451  $\mu\text{mol}$ ) and disaccharide squarate **41** (4.5 mg, 6.77  $\mu\text{mol}$ ) were dissolved in 0.5 M borate buffer pH 9 (600  $\mu\text{L}$ ) and stirred slowly at 21 °C for 3 days. Then the reaction mixture was diluted with Mili-Q water, filtered through milipore filtration tube (10,000 MWCO, 4 x 10 mL), lyophilized and the BSA-conjugate **47** was obtained as a white foam (30.4 mg, 89%). The MALDI-TOF mass spectrometry analysis indicated the conjugate **47** had an average of 15.2 disaccharides per BSA.

*Preparation of BSA conjugate 48.* BSA (30 mg, 0.451  $\mu\text{mol}$ ) and trisaccharide squarate **42** (5.7 mg, 6.74  $\mu\text{mol}$ ) were dissolved in 0.5 M borate buffer pH 9 (700  $\mu\text{L}$ ) and stirred slowly at 21 °C for 3 days. Then the reaction mixture was diluted with Mili-Q water, filtered through milipore filtration tube (10,000 MWCO, 4 x 10 mL), lyophilized and the BSA-conjugate **48** was obtained as a white foam (32.3 mg, 91%). The MALDI-TOF mass spectrometry analysis indicated the conjugate **48** had an average of 15.9 trisaccharides per BSA.

*Preparation of BSA conjugate 49.* BSA (32.5 mg, 0.489  $\mu\text{mol}$ ) and trisaccharide squarate **43** (6.2 mg, 7.34  $\mu\text{mol}$ ) were dissolved in 0.5 M borate buffer pH 9 (700  $\mu\text{L}$ ) and stirred slowly at 21 °C for 3 days. Then the reaction mixture was diluted with Mili-Q water, filtered through milipore filtration tube (10,000 MWCO, 4 x 10 mL), lyophilized and the BSA-conjugate **49** was obtained as a white foam (33.5 mg, 87%). The MALDI-TOF mass spectrometry analysis indicated the conjugate **49** had an average of 15.7 trisaccharides per BSA.

*Preparation of BSA conjugate 50.* BSA (11 mg, 0.165  $\mu\text{mol}$ ) and tetrasaccharide squarate **44** (2.5 mg, 2.45  $\mu\text{mol}$ ) were dissolved in 0.5 M borate buffer pH 9 (400  $\mu\text{L}$ ) and stirred slowly at 21 °C for 3 days. Then the reaction mixture was diluted with Mili-Q water, filtered through milipore filtration tube (10,000 MWCO, 4 x 10 mL), lyophilized and the BSA-conjugate **50** was obtained as a white foam (12 mg, 92%). The MALDI-TOF mass spectrometry analysis indicated the conjugate **50** had an average of 13.4 tetrasaccharides per BSA.

*Preparation of BSA conjugate 51.* BSA (5 mg, 0.0752  $\mu\text{mol}$ ) and hexasaccharide squarate **45** (1.5 mg, 1.099  $\mu\text{mol}$ ) were dissolved in 0.5 M borate buffer pH 9 (400  $\mu\text{L}$ ) and stirred slowly at 21 °C for 3 days. Then the reaction mixture was diluted with Mili-Q water, filtered through milipore filtration tube (10,000 MWCO, 4 x 10 mL), lyophilized and the BSA-conjugate **51** was obtained as a white foam (6 mg, 97%). The MALDI-TOF mass spectrometry analysis indicated the conjugate **51** had an average of 11.8 hexasaccharides per BSA.

*Preparation of BSA conjugate 52.* BSA (5 mg, 0.0752  $\mu\text{mol}$ ) and hexasaccharide squarate **46** (1.5 mg, 1.099  $\mu\text{mol}$ ) were dissolved in 0.5 M borate buffer pH 9 (400  $\mu\text{L}$ ) and stirred slowly at 21  $^{\circ}\text{C}$  for 3 days. Then the reaction mixture was diluted with Mili-Q water, filtered through milipore filtration tube (10,000 MWCO, 4 x 10 mL), lyophilized and the BSA-conjugate **52** was obtained as a white foam (5.5 mg, 87%). The MALDI-TOF mass spectrometry analysis indicated the conjugate **52** had an average of 13.8 hexasaccharides per BSA.

*Preparation of tetanus toxoid conjugate 53:* Hexasaccharide squarate **45** (0.55 mg, 0.403  $\mu\text{mol}$ ) was added to the solution of tetanus toxoid (2 mg, 0.0133  $\mu\text{mol}$ ) in 0.5 M borate buffer pH 9 (1 mL) and stirred slowly at 21  $^{\circ}\text{C}$  for 3 days. Then the reaction mixture was washed with PBS buffer, filtered through milipore filtration tube (10,000 MWCO, 4 x 10 mL) and the resulting tetanus toxoid-conjugate **53** was stored in PBS buffer. The MALDI-TOF mass spectrometry analysis indicated the conjugate **53** had an average of 15.1 hexasaccharides per tetanus toxoid.

*Preparation of tetanus toxoid conjugate 54:* Hexasaccharide squarate **46** (0.55 mg, 0.403  $\mu\text{mol}$ ) was added to the solution of tetanus toxoid (2 mg, 0.0133  $\mu\text{mol}$ ) in 0.5 M borate buffer pH 9 (1 mL) and stirred slowly at 21  $^{\circ}\text{C}$  for 3 days. Then the reaction mixture was washed with PBS buffer, filtered through milipore filtration tube (10,000 MWCO, 4 x 10 mL) and the resulting tetanus toxoid-conjugate **54** was stored in PBS buffer. The MALDI-TOF mass spectrometry analysis indicated the conjugate **54** had an average of 14.6 hexasaccharides per tetanus toxoid.

## ELISA titrations for conjugates 47-52 with Mouse mAbs

Figure S1 Plates coated with **47**

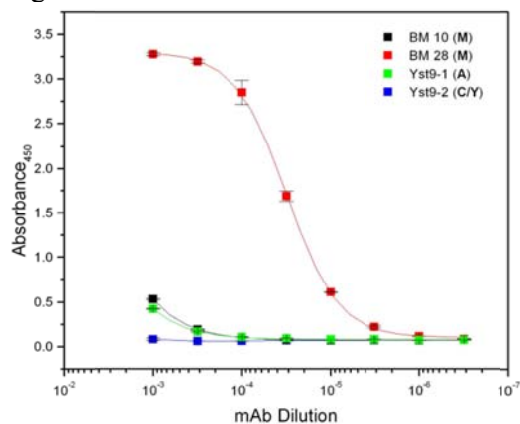

Figure S4 Plates coated with **50**

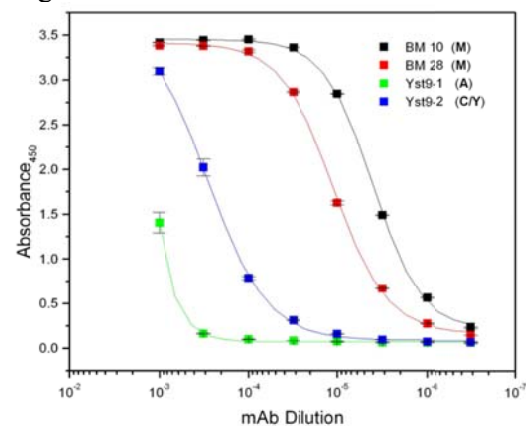

Figure S2 Plates coated with **48**

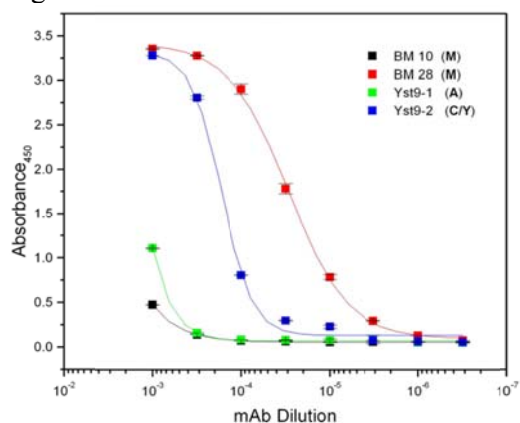

Figure S5 Plates coated with **51**

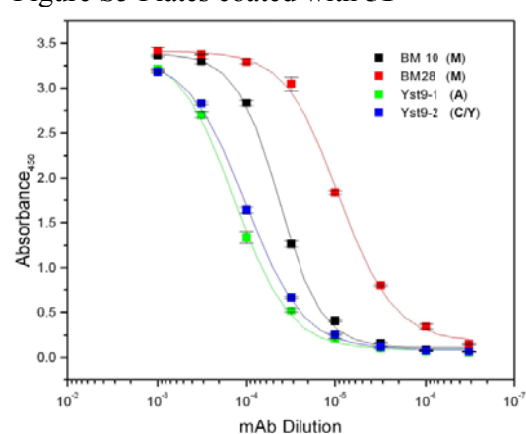

Figure S3 Plates coated with **49**

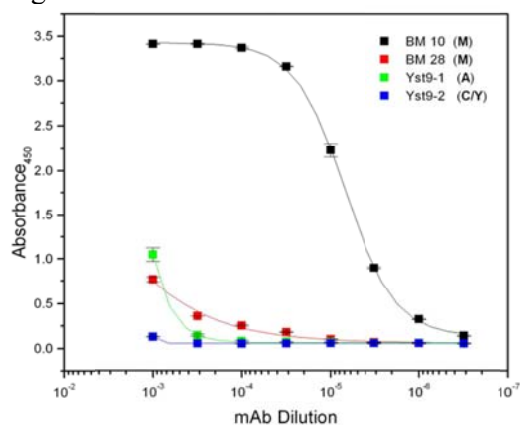

Figure S1 Plates coated with **52**

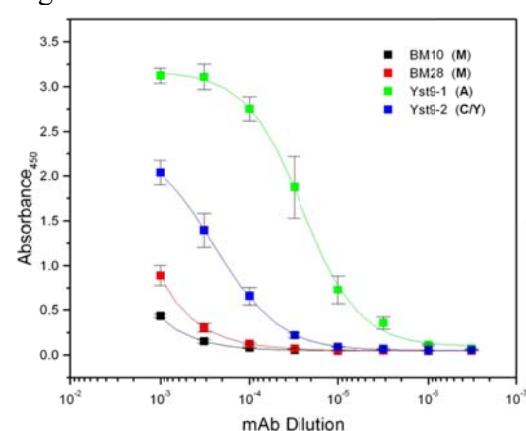

**Figure S7 ELISA for Disaccharide conjugate 47 with OIE standard bovine sera**

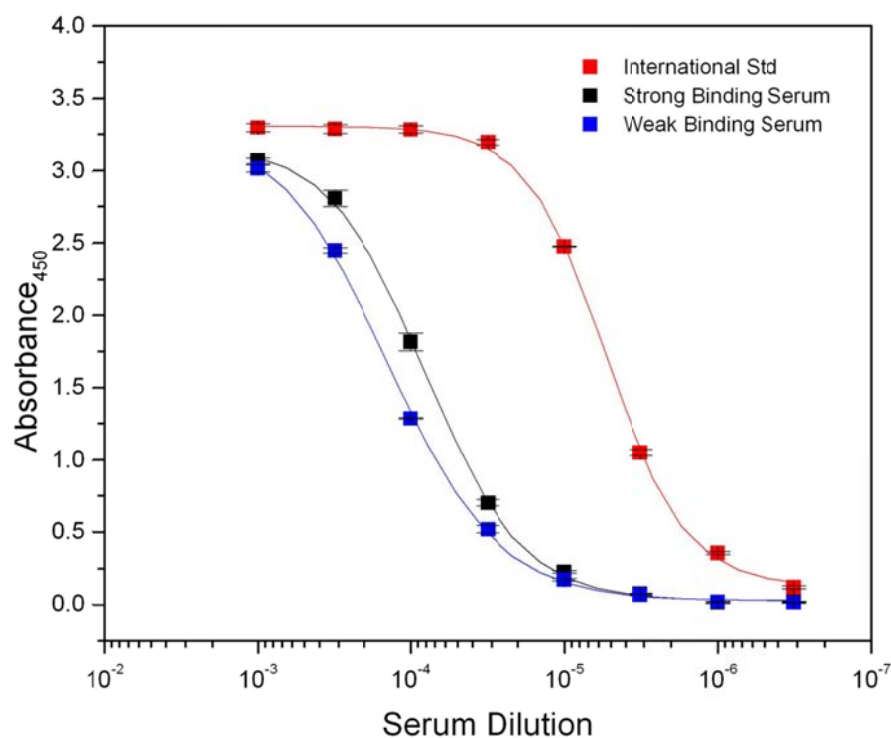

**Figure S8 ELISA for tetrasaccharide conjugate 50 with OIE standard bovine sera**

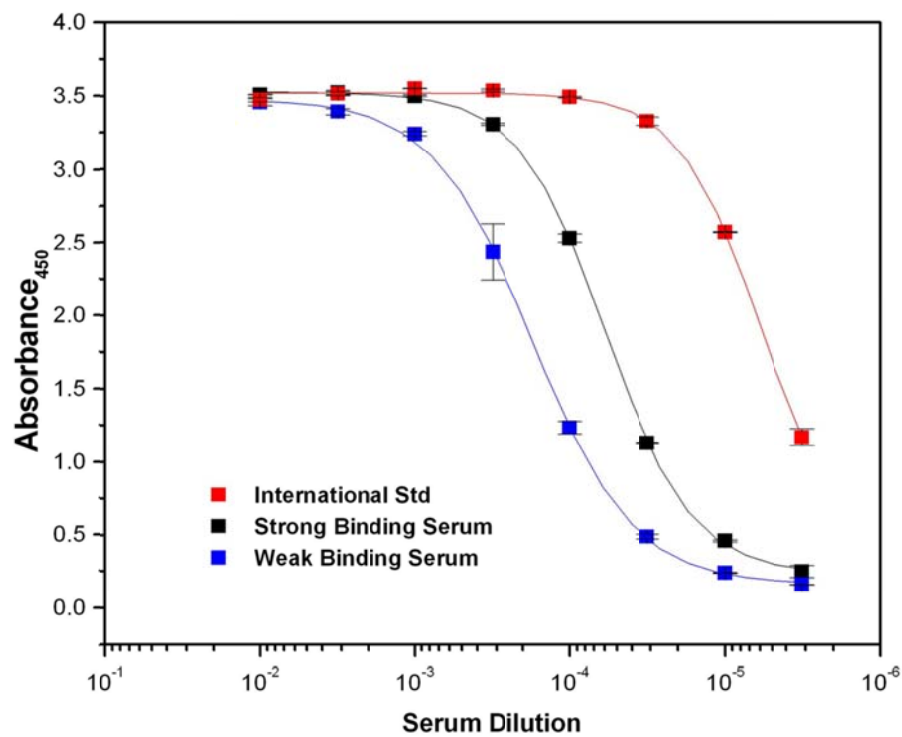

**Figure S9 ELISA for hexasaccharide conjugate 52 with OIE standard bovine sera**

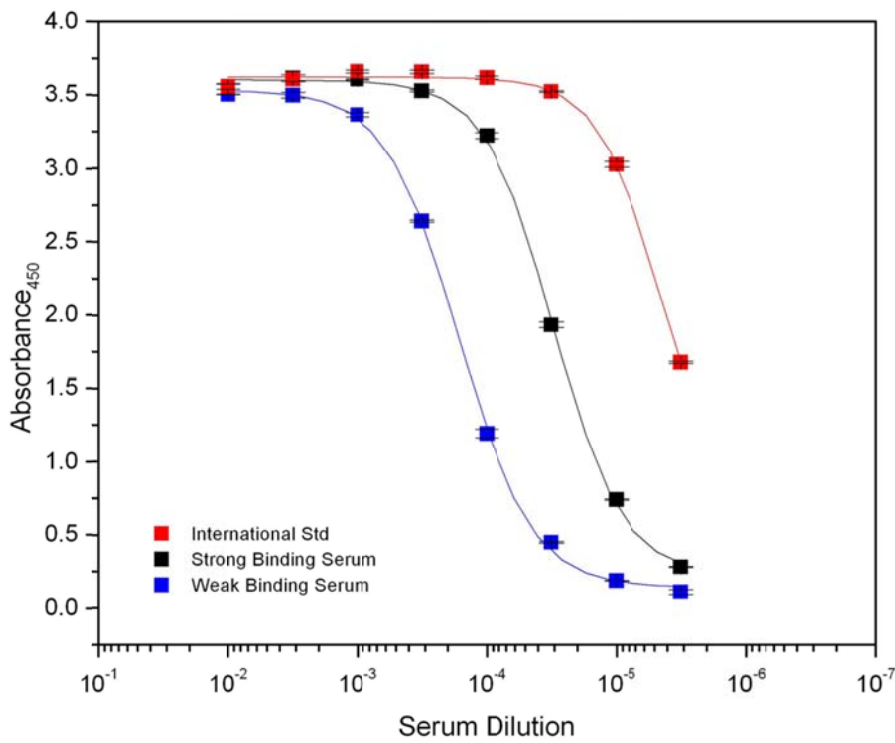

**Figure S10 ELISA for human sera with conjugates 47-50 and penta and nonasaccharides previously reported<sup>7</sup>**

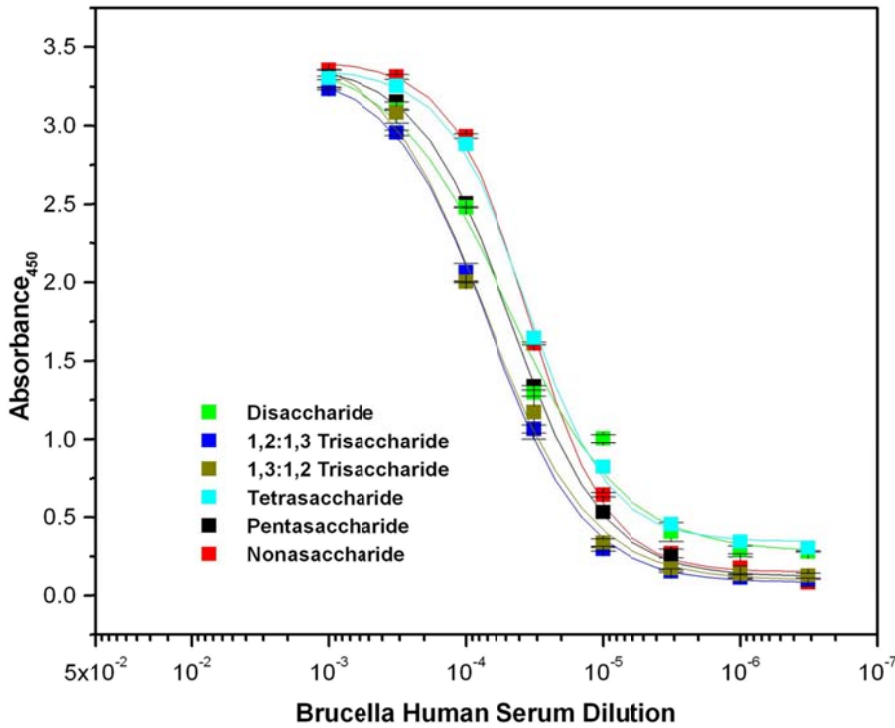



Immune response for CD1 mice immunized with tetanus toxoid conjugated to hexsaccharide 6

Figure S11 Response titered on plates coated with conjugate 52

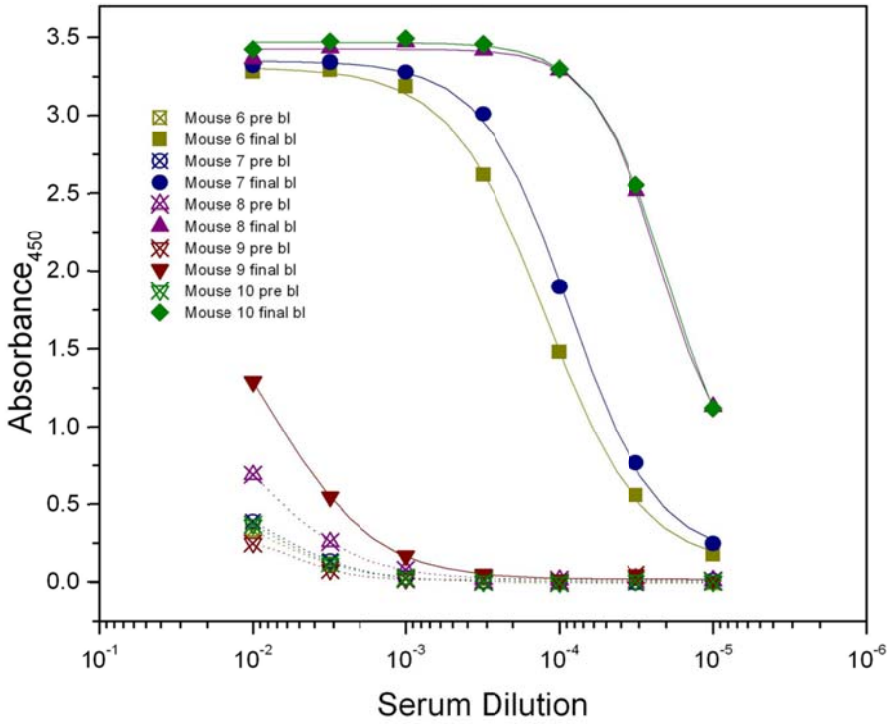

Figure S12 Response titered on plates coated with *B. abortus* LPS

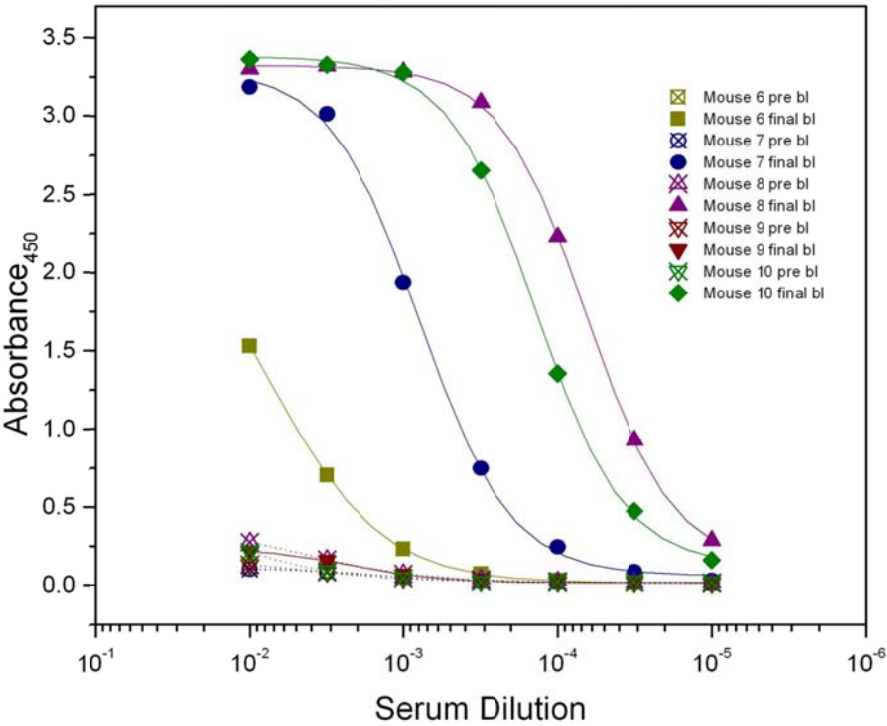

Figure S13 Response titrated on plates coated with *B. melitensis* LPS

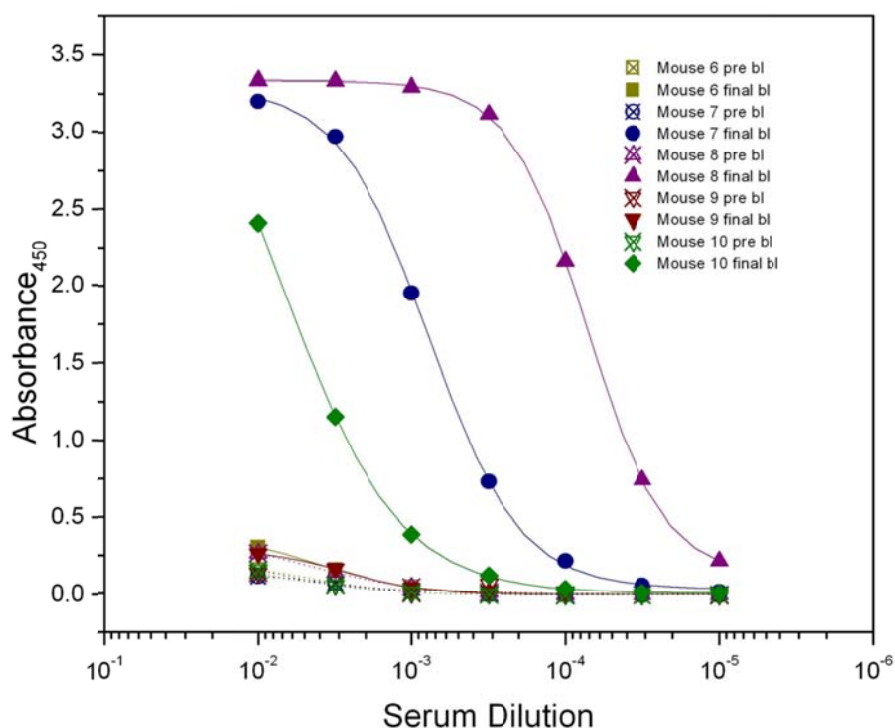

## VI. REFERENCES

- [1] a) Bundle, D. R.; Gerken, M.; Peters, T. *Carbohydr. Res.* **1988**, *174*, 239-251; b) Eis, M. J.; Ganem, B. *Carbohydr. Res.* **1988**, *176*, 316-323.
- [2] Eichler, E.; Kihlberg, J.; Bundle, D. R. *Glycoconjugate J.* **1991**, *8*, 69-74.
- [3] a) Peters, T.; Bundle, D. R. *Can. J. Chem.* **1989**, *67*, 497-502; b) Saksena, R.; Chernyak, A.; Kováč, P. *Carbohydr. Res.* **2008**, *343*, 1693-1706.
- [4] a) Peters, T.; Bundle, D. R. *Can. J. Chem.* **1989**, *67*, 491-496; b) Peters, T.; Bundle, D. R. *J. Chem. Soc. Chem. Commun.* **1987**, 1648-1650.
- [5] Saksena, R.; Zhang, J.; Kováč, P. *Tetrahedron: Asymmetry*. **2005**, *16*, 187-197.
- [6] a) Muramatsu, I.; Itoi, M.; Tsuji, M.; Hagitani, A. *Bull. Chem. Soc. Japan*, **1964**, *37*, 756; b) Olah, G. A.; Vankar, Y. D.; Arvanaghi, M.; Sommer, J. *Angew. Chem. Int. Ed.* **1979**, *18*, 614.
- [7] Guiard, J.; Paszkiewicz, E.; Sadowska, J.; Bundle, D. R. *Angew. Chem. Int. Ed.* **2013**, *52*, 7181-7185.

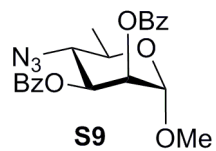

600 MHz, CDCl<sub>3</sub>

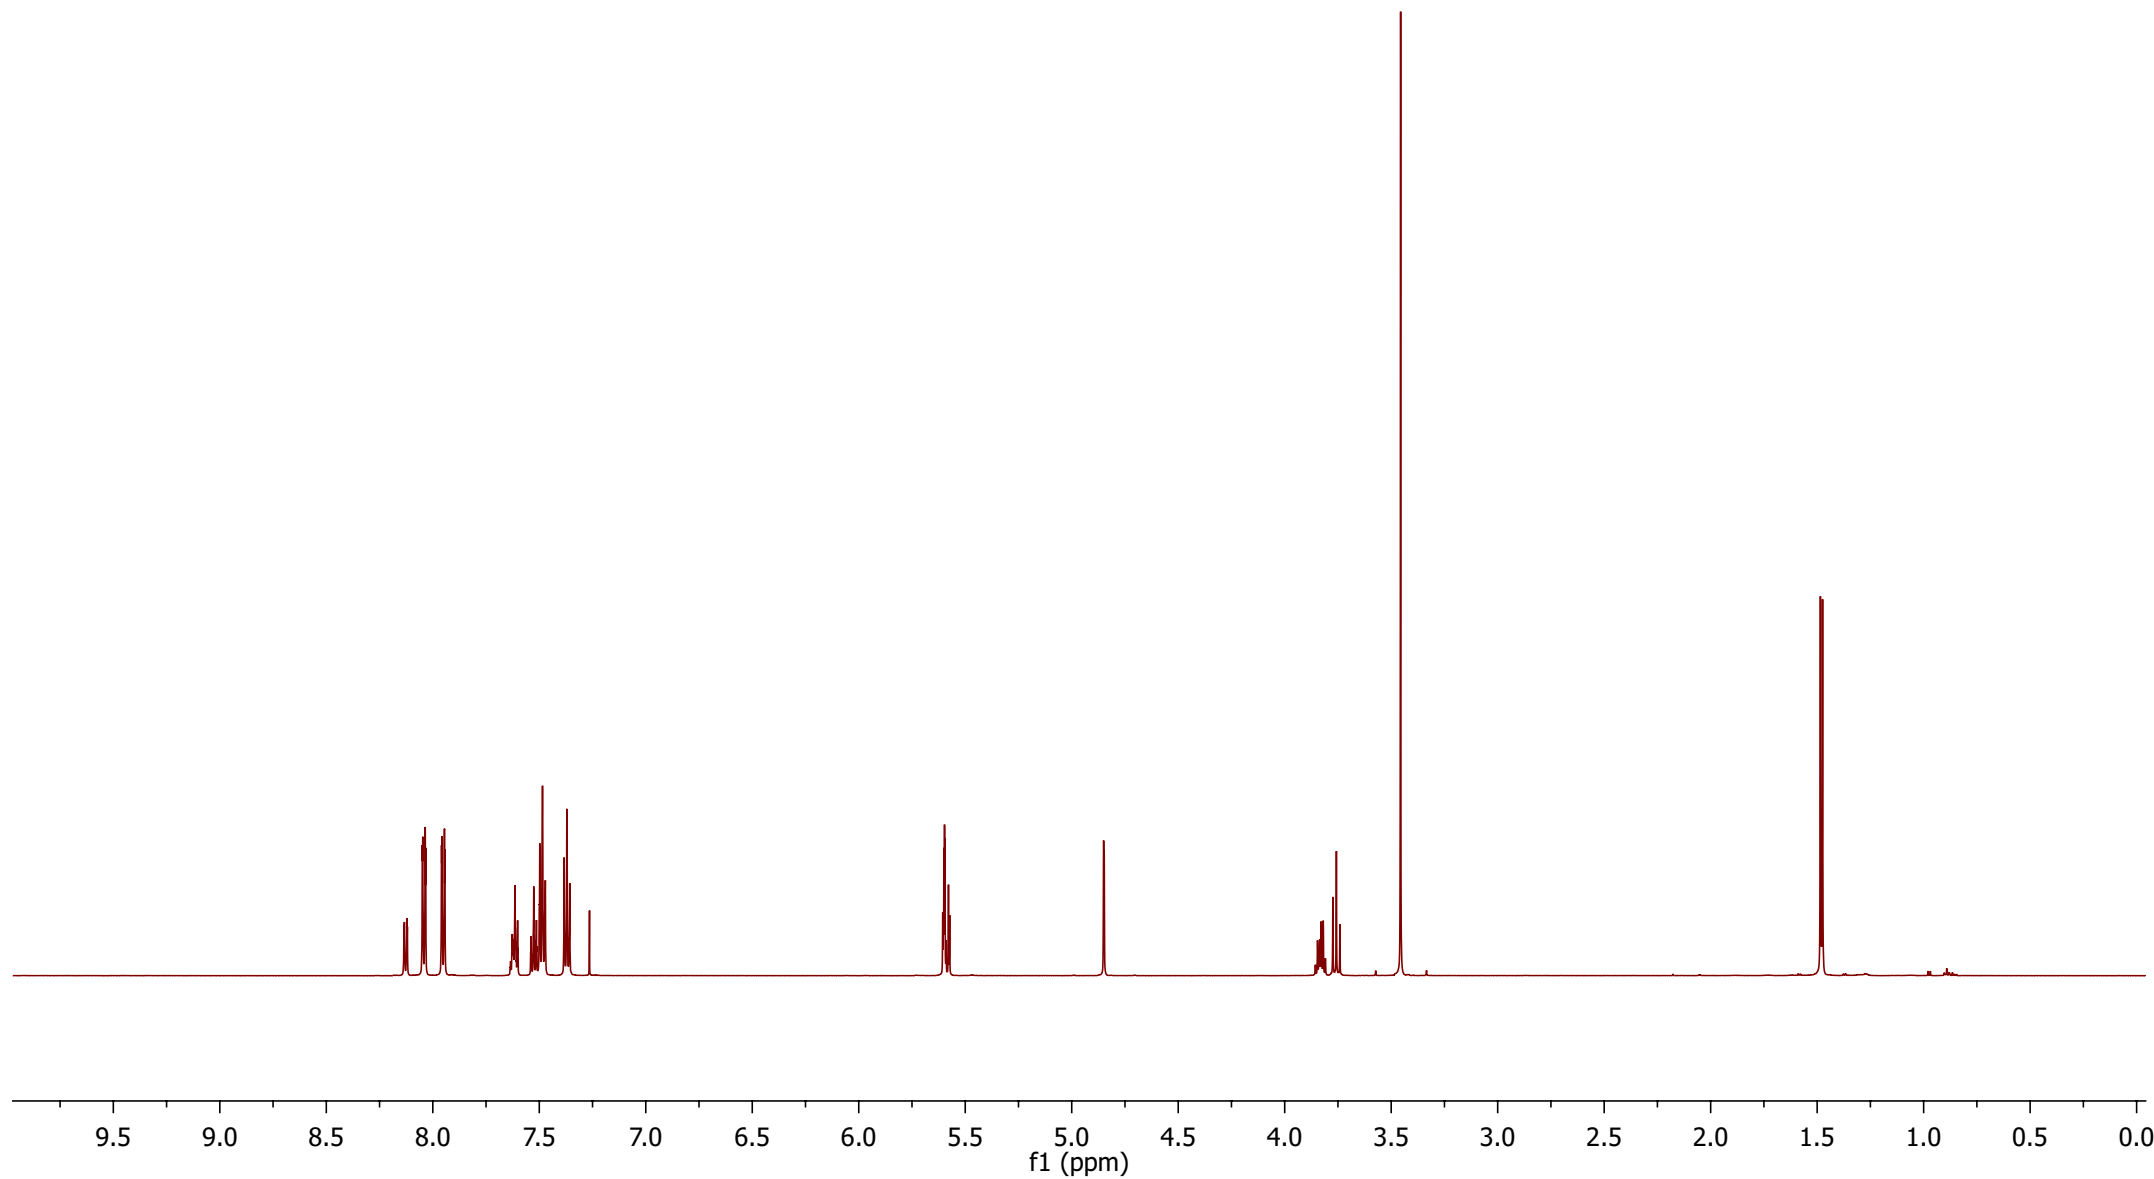

126 MHz, CDCl<sub>3</sub>

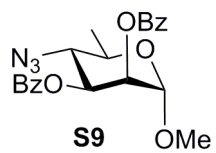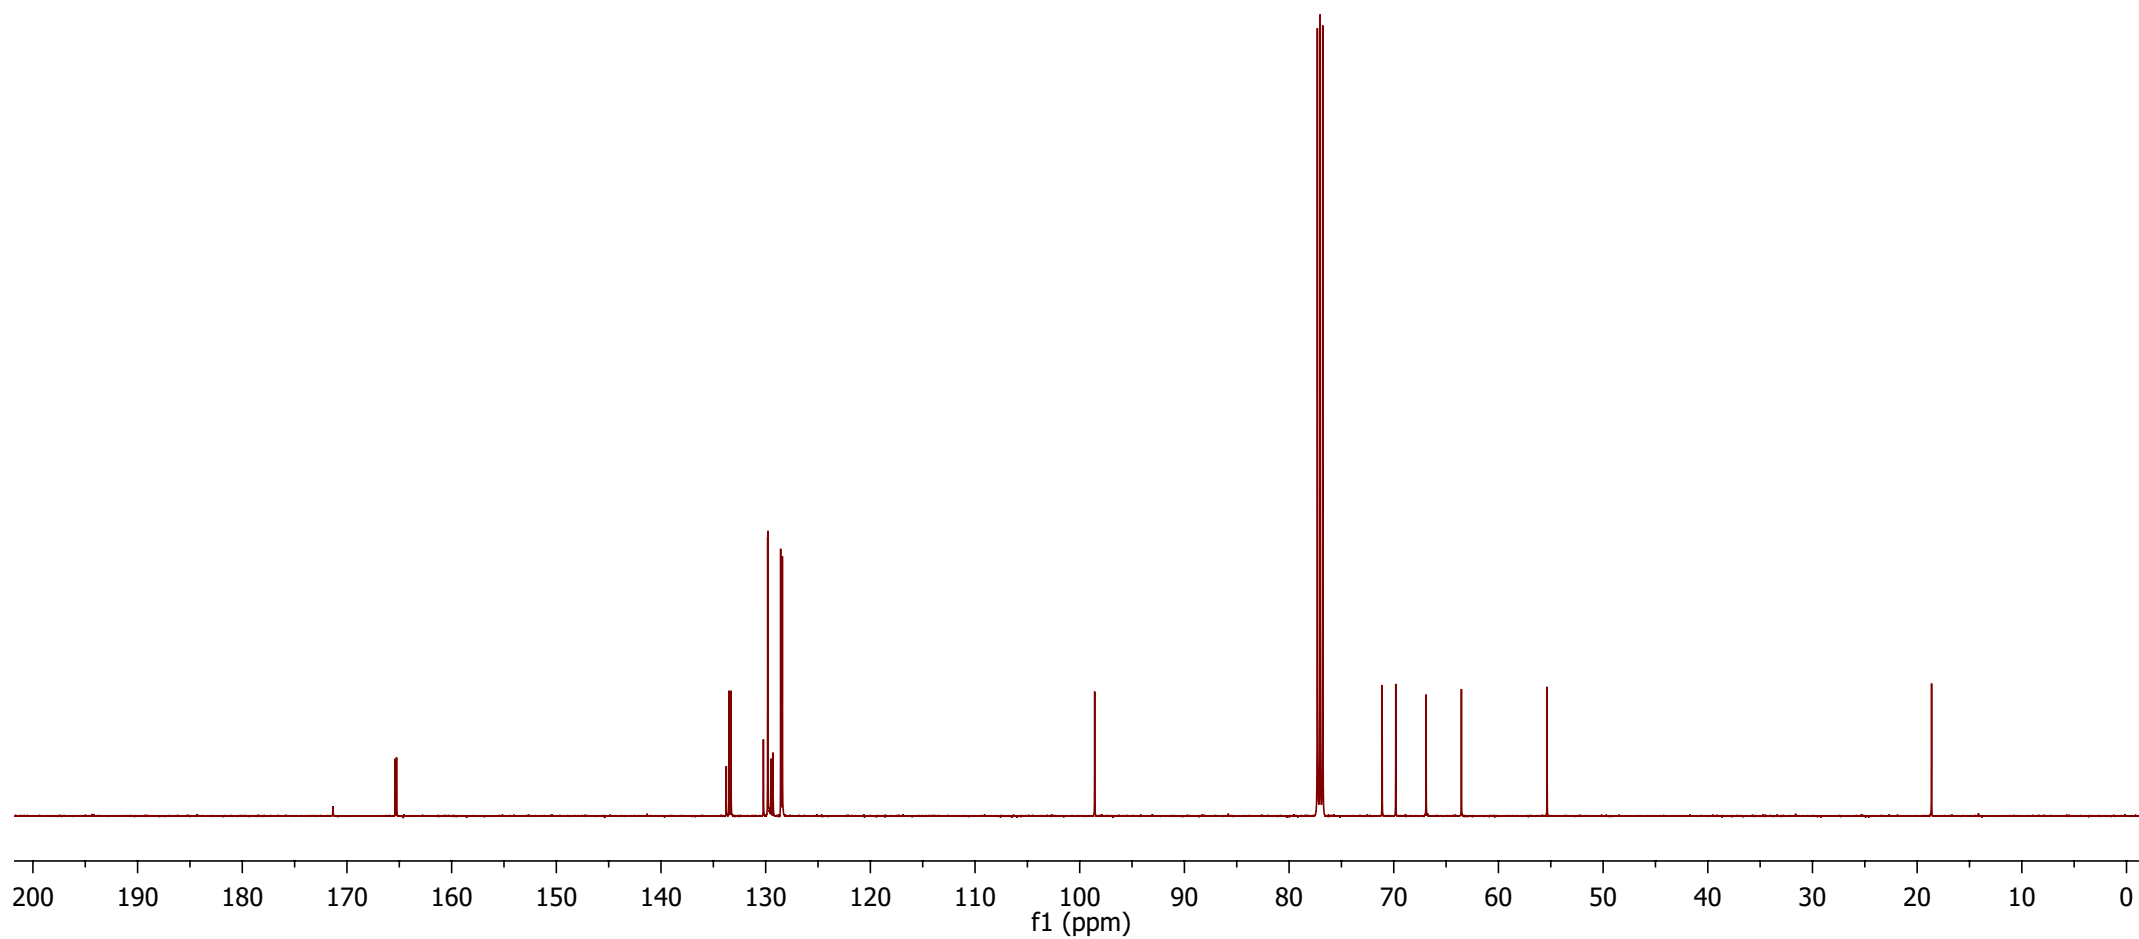

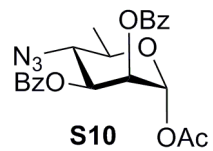

500 MHz, CDCl<sub>3</sub>

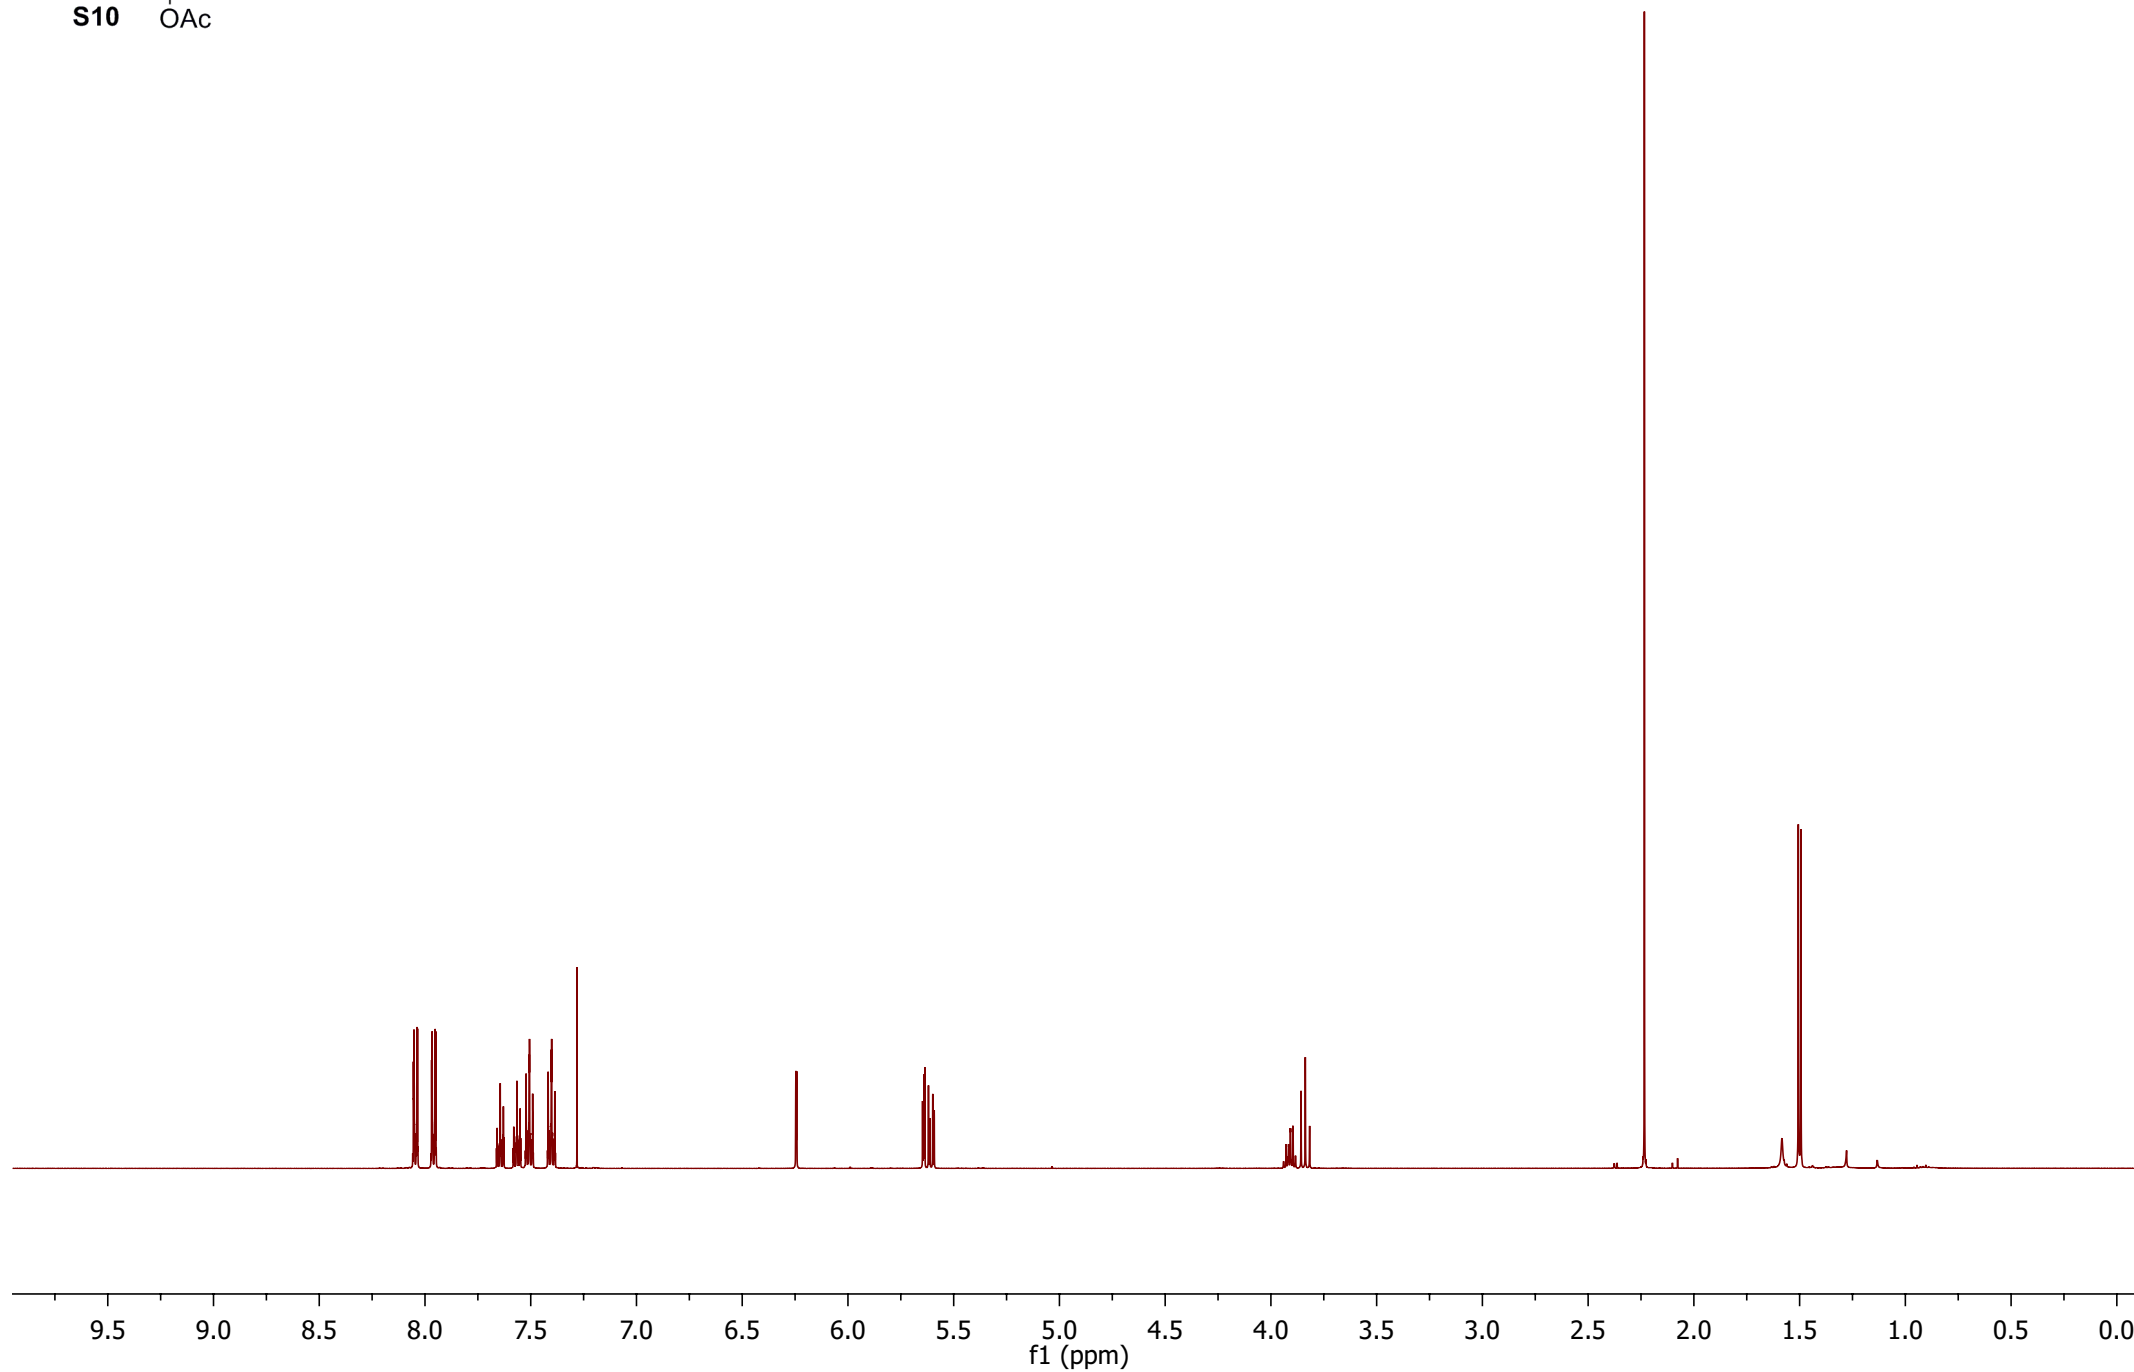

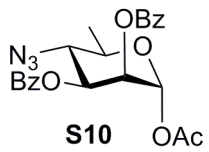

126 MHz, CDCl<sub>3</sub>

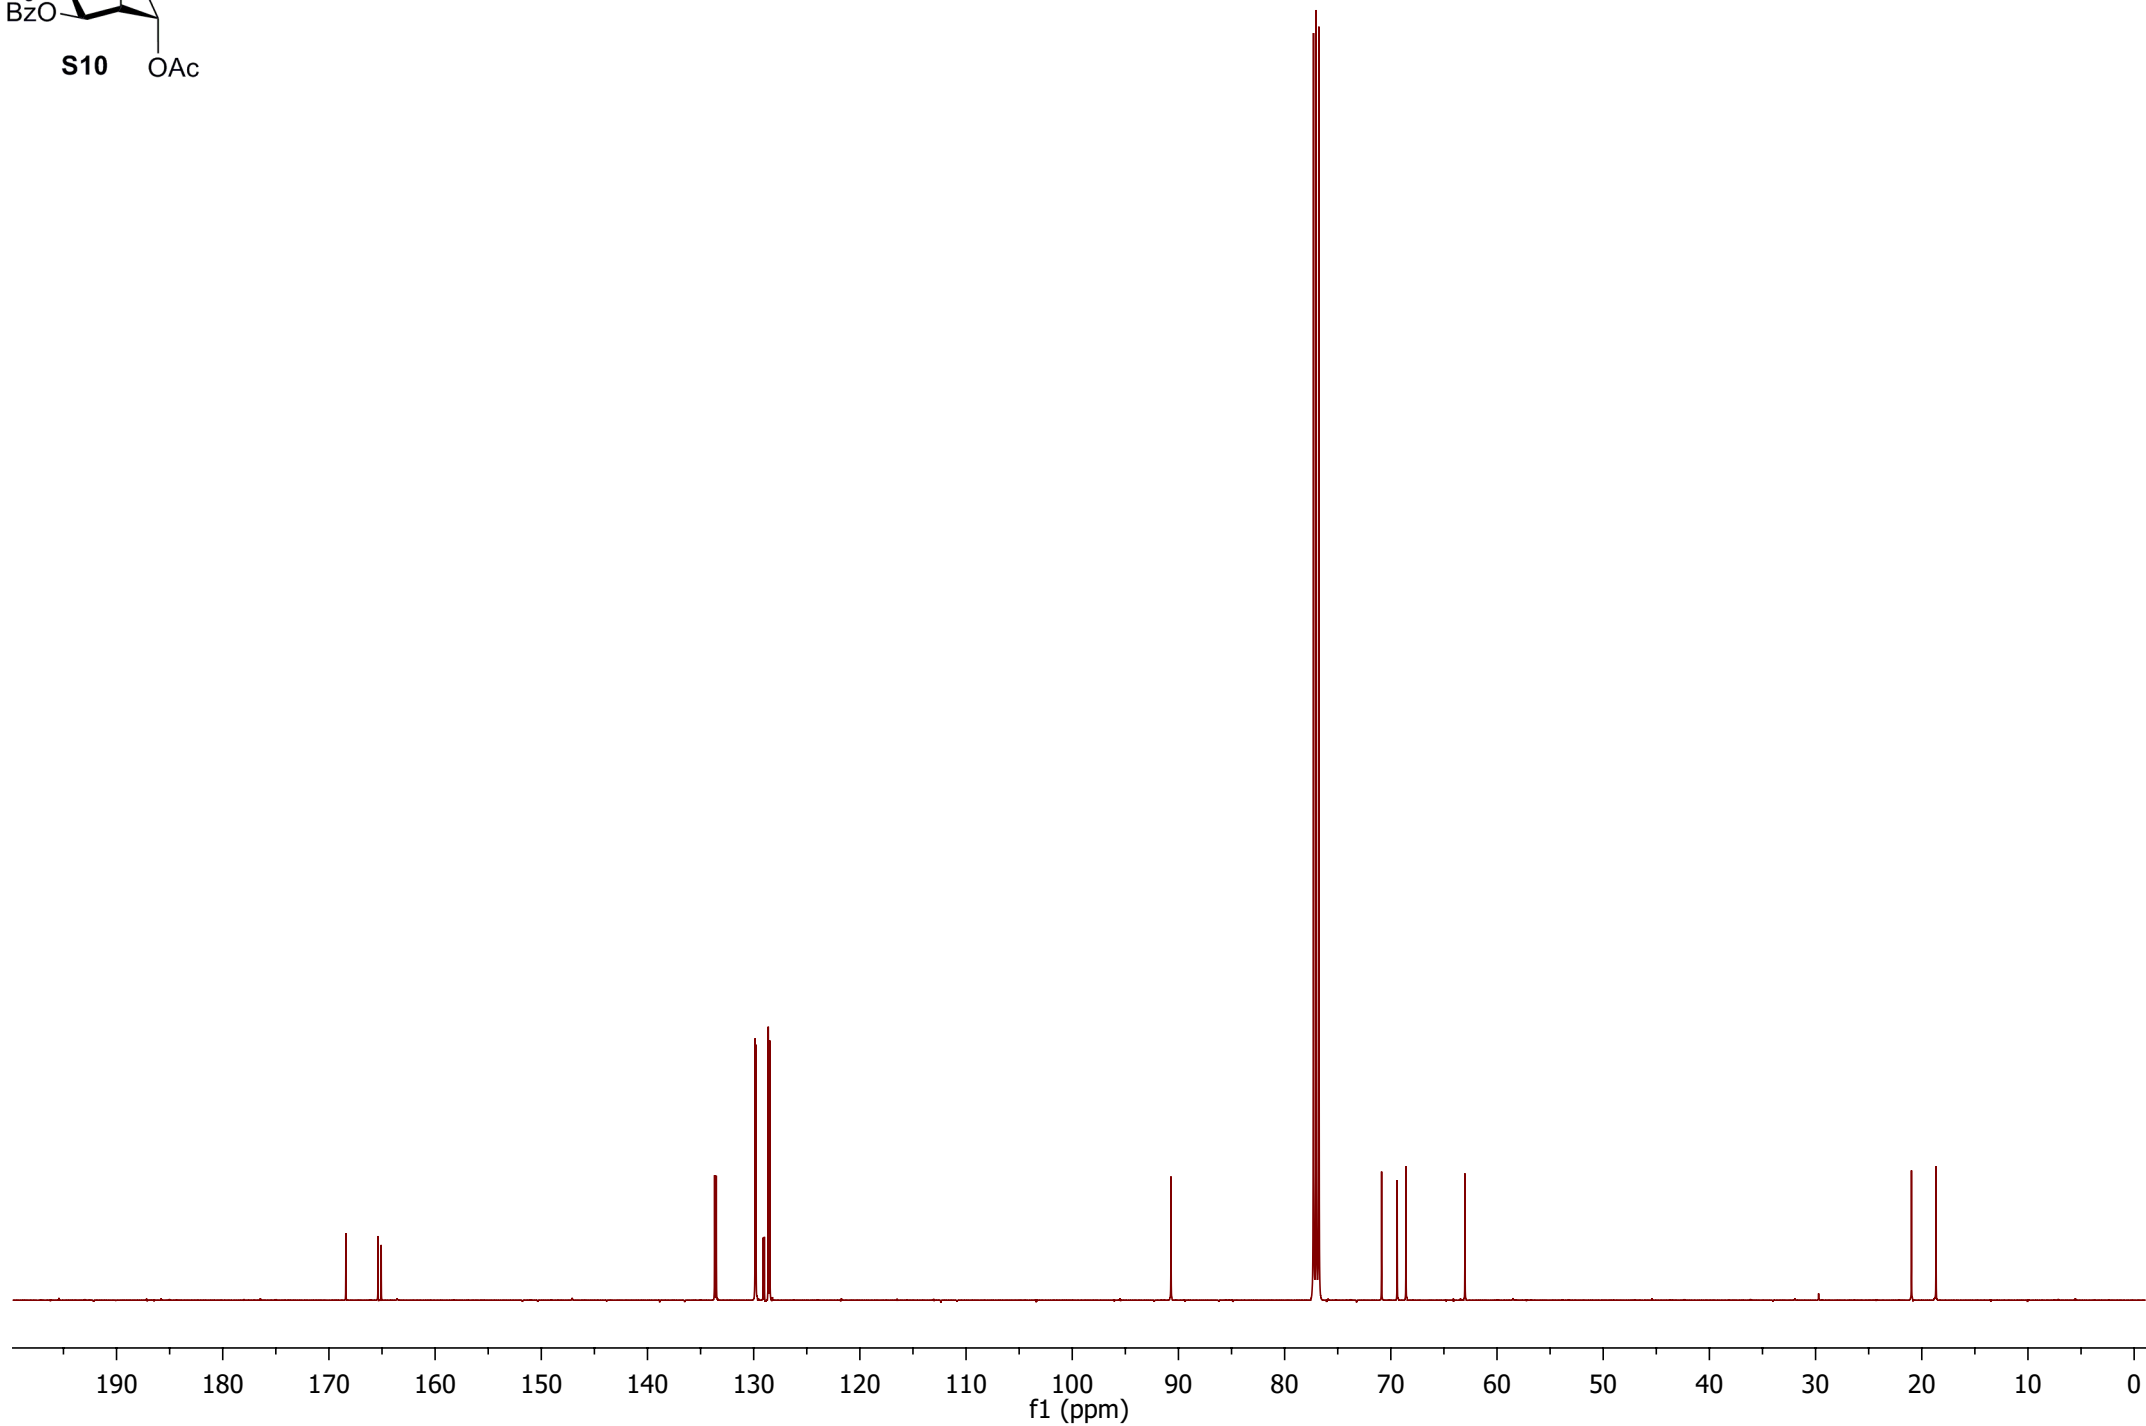

500 MHz, CDCl<sub>3</sub>

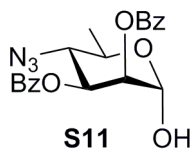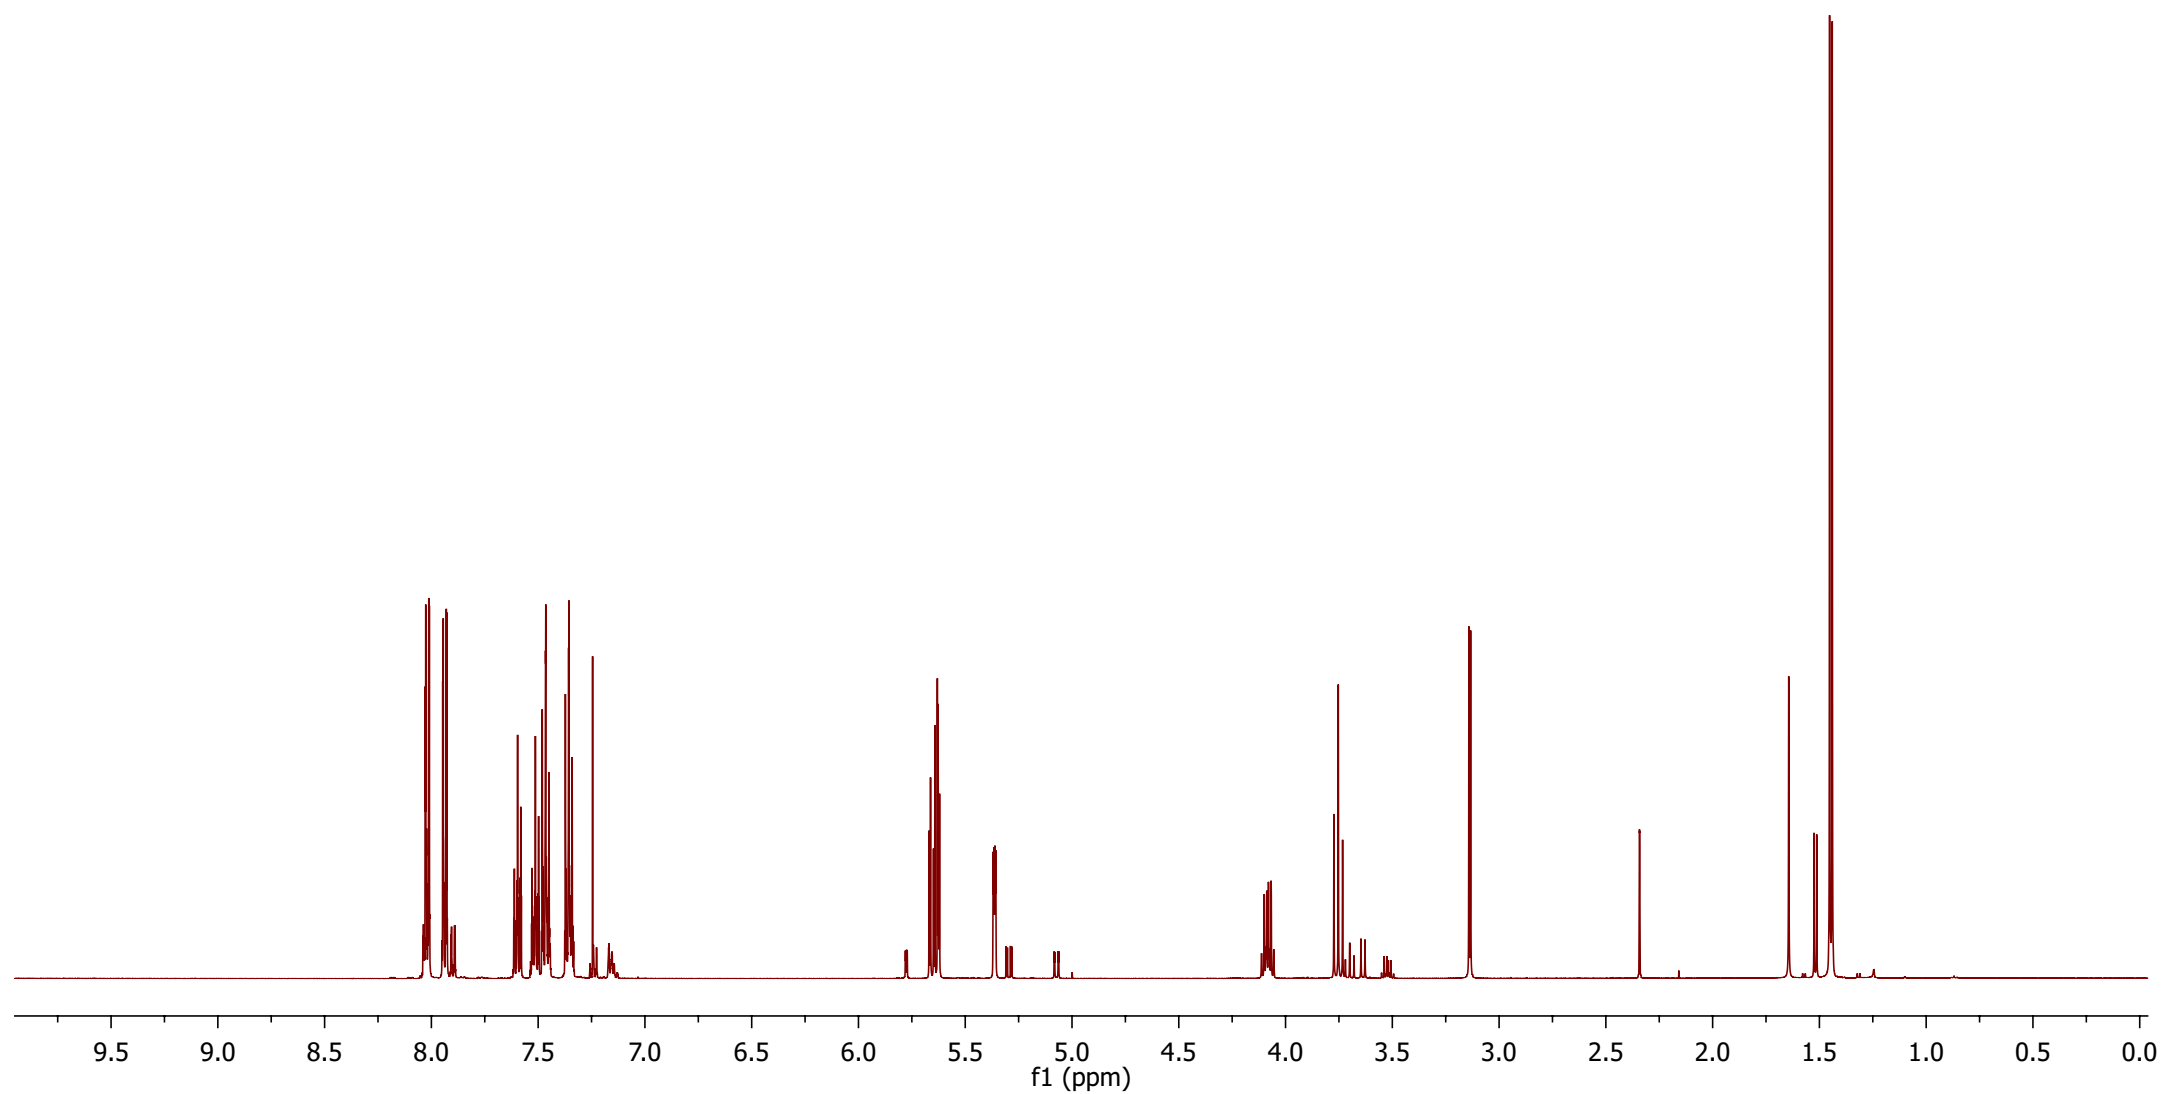

126 MHz, CDCl<sub>3</sub>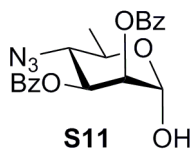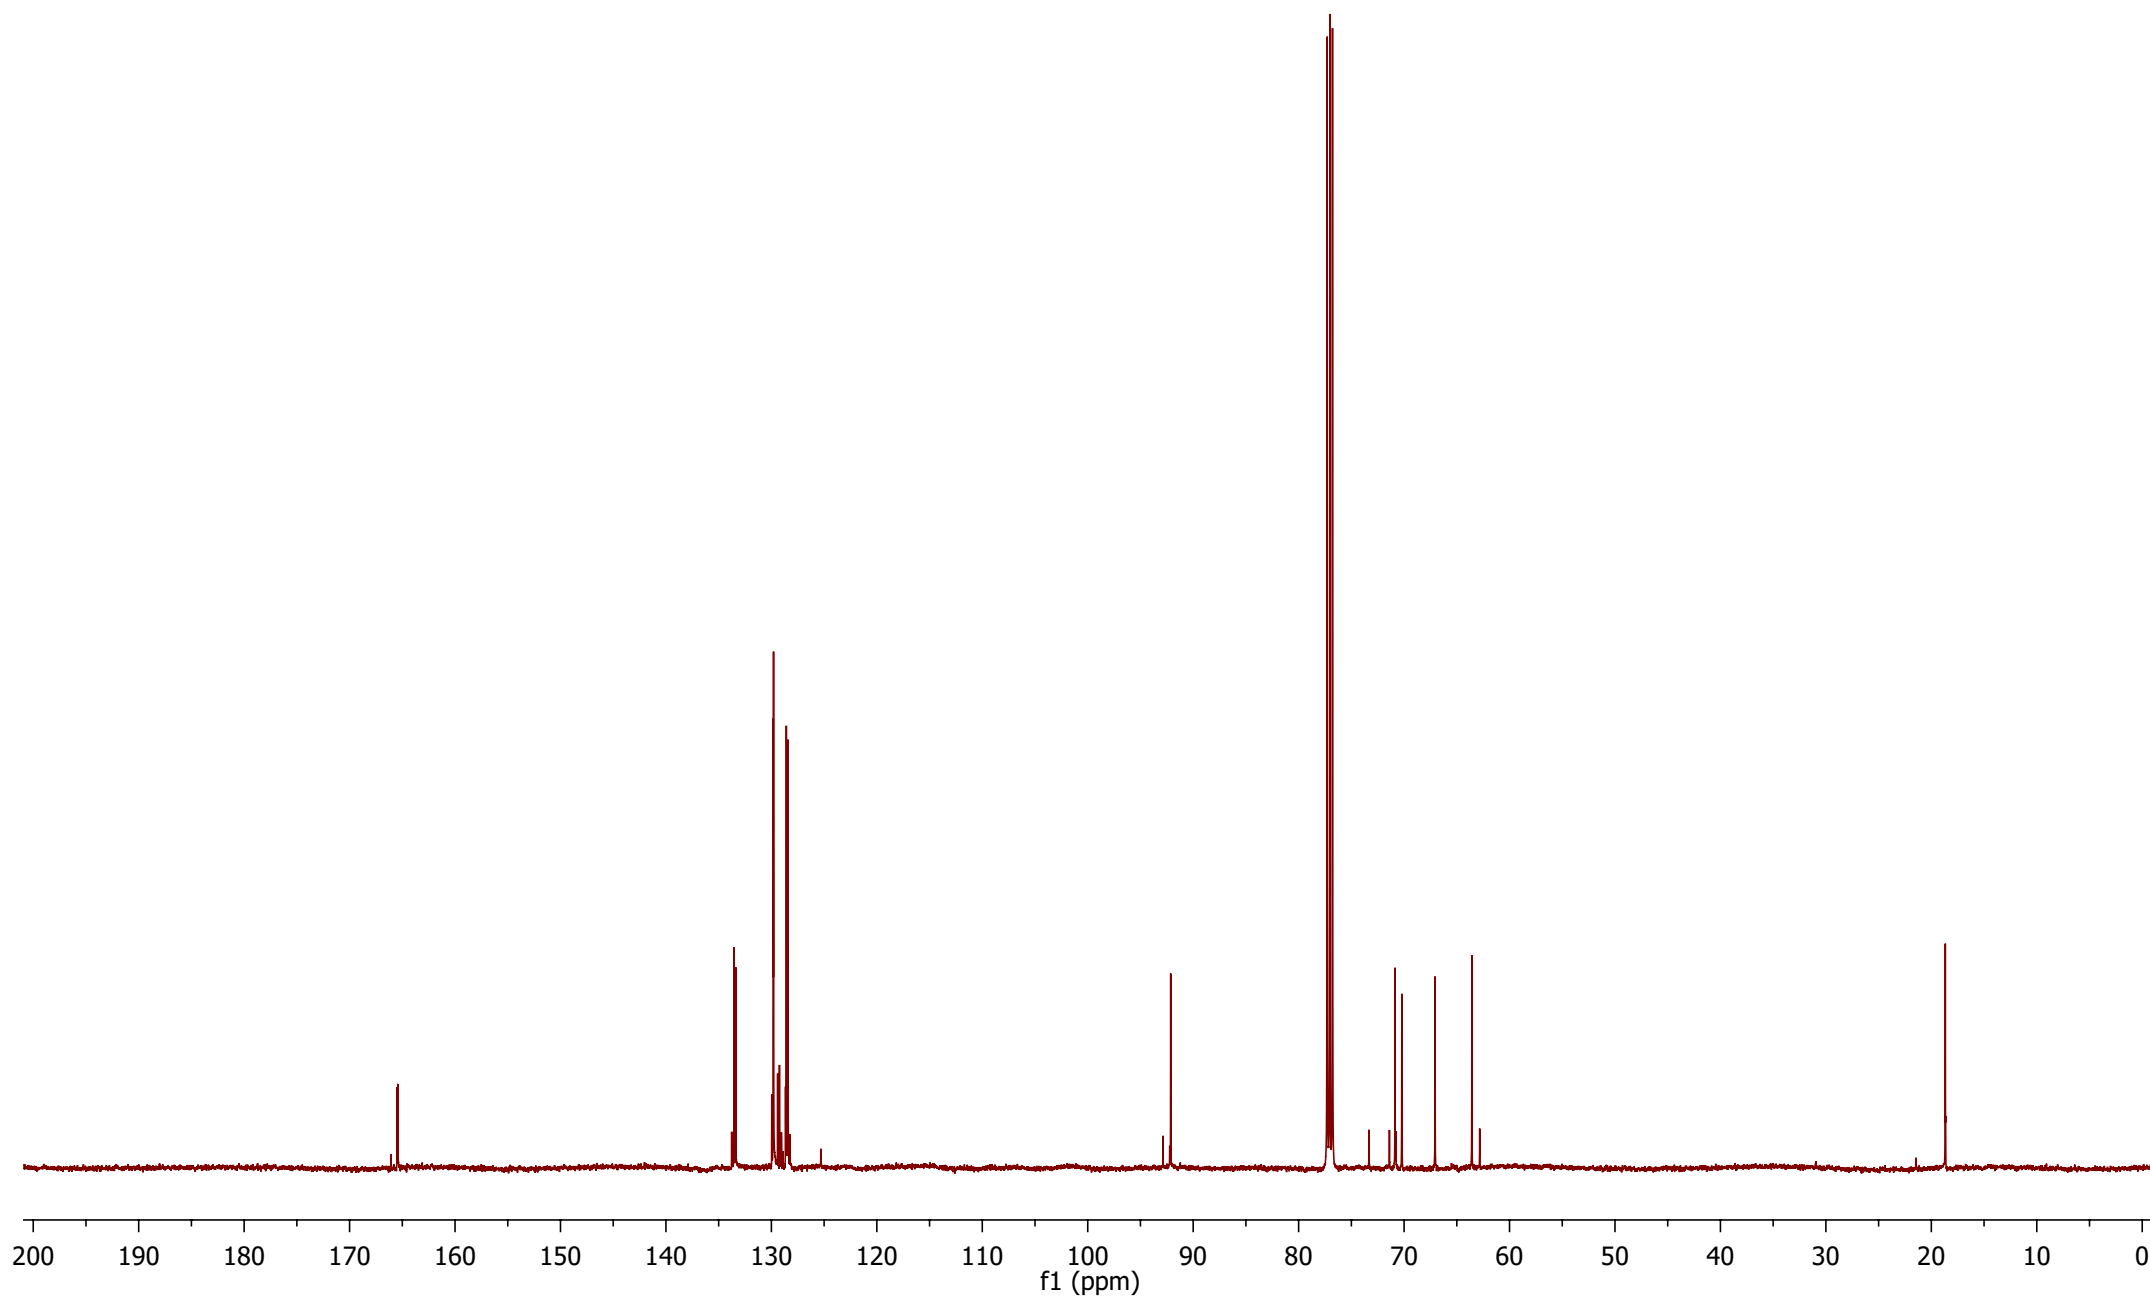



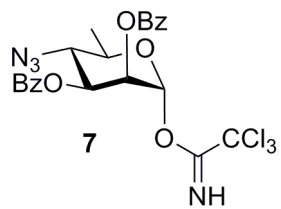

500 MHz,  $CDCl_3$

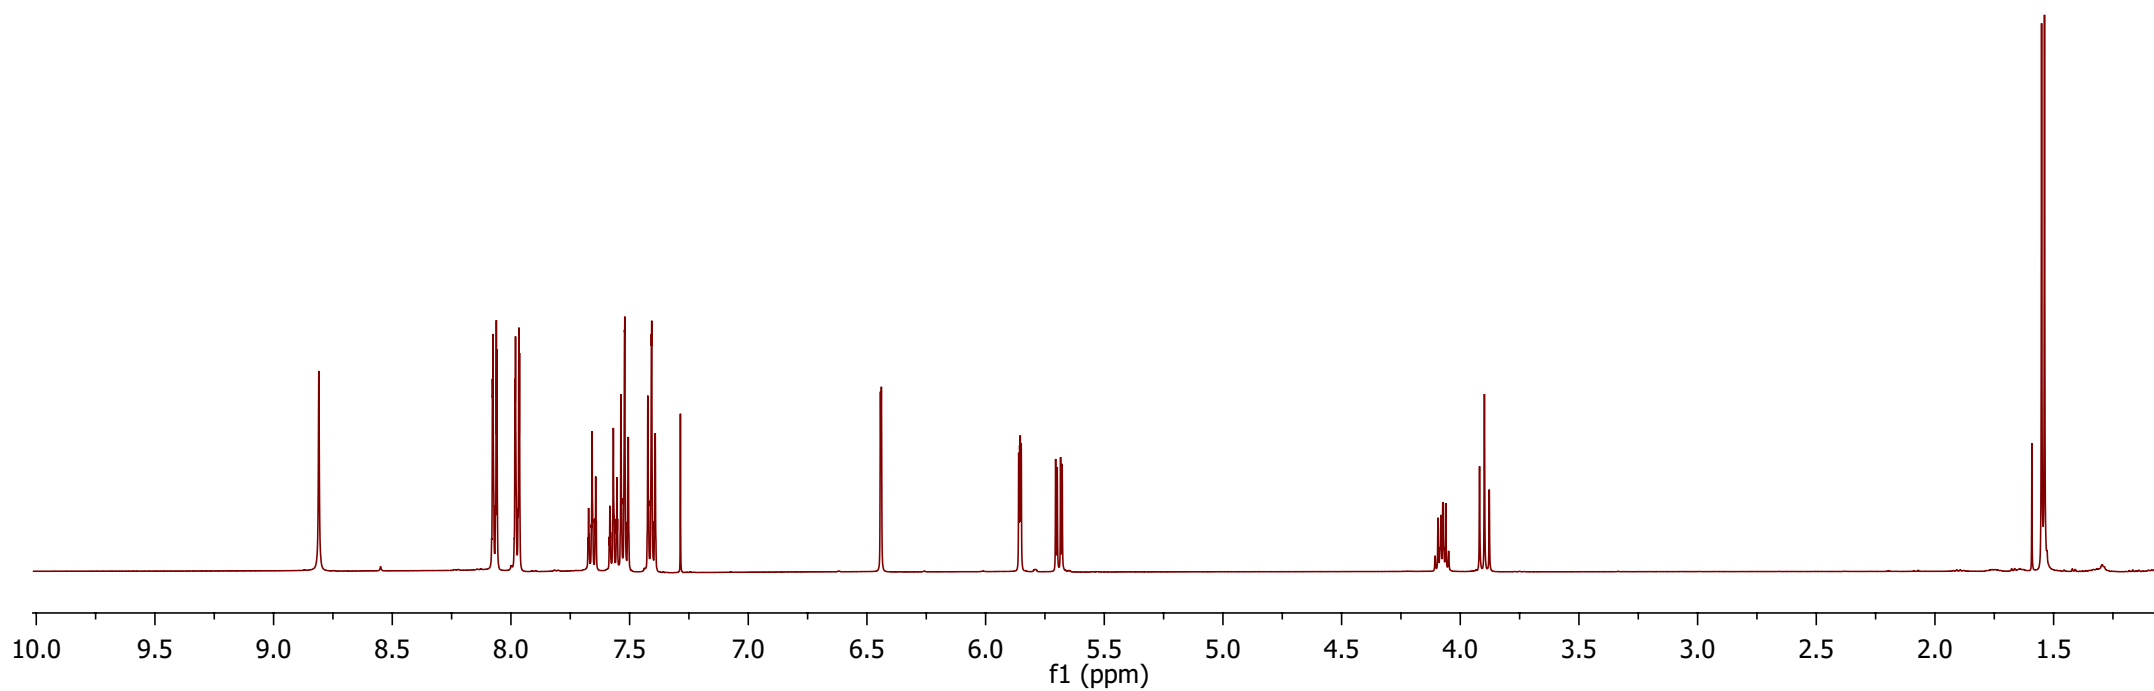

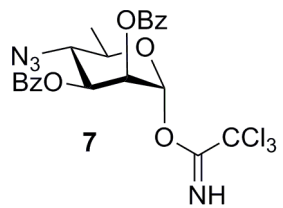

126 MHz,  $CDCl_3$

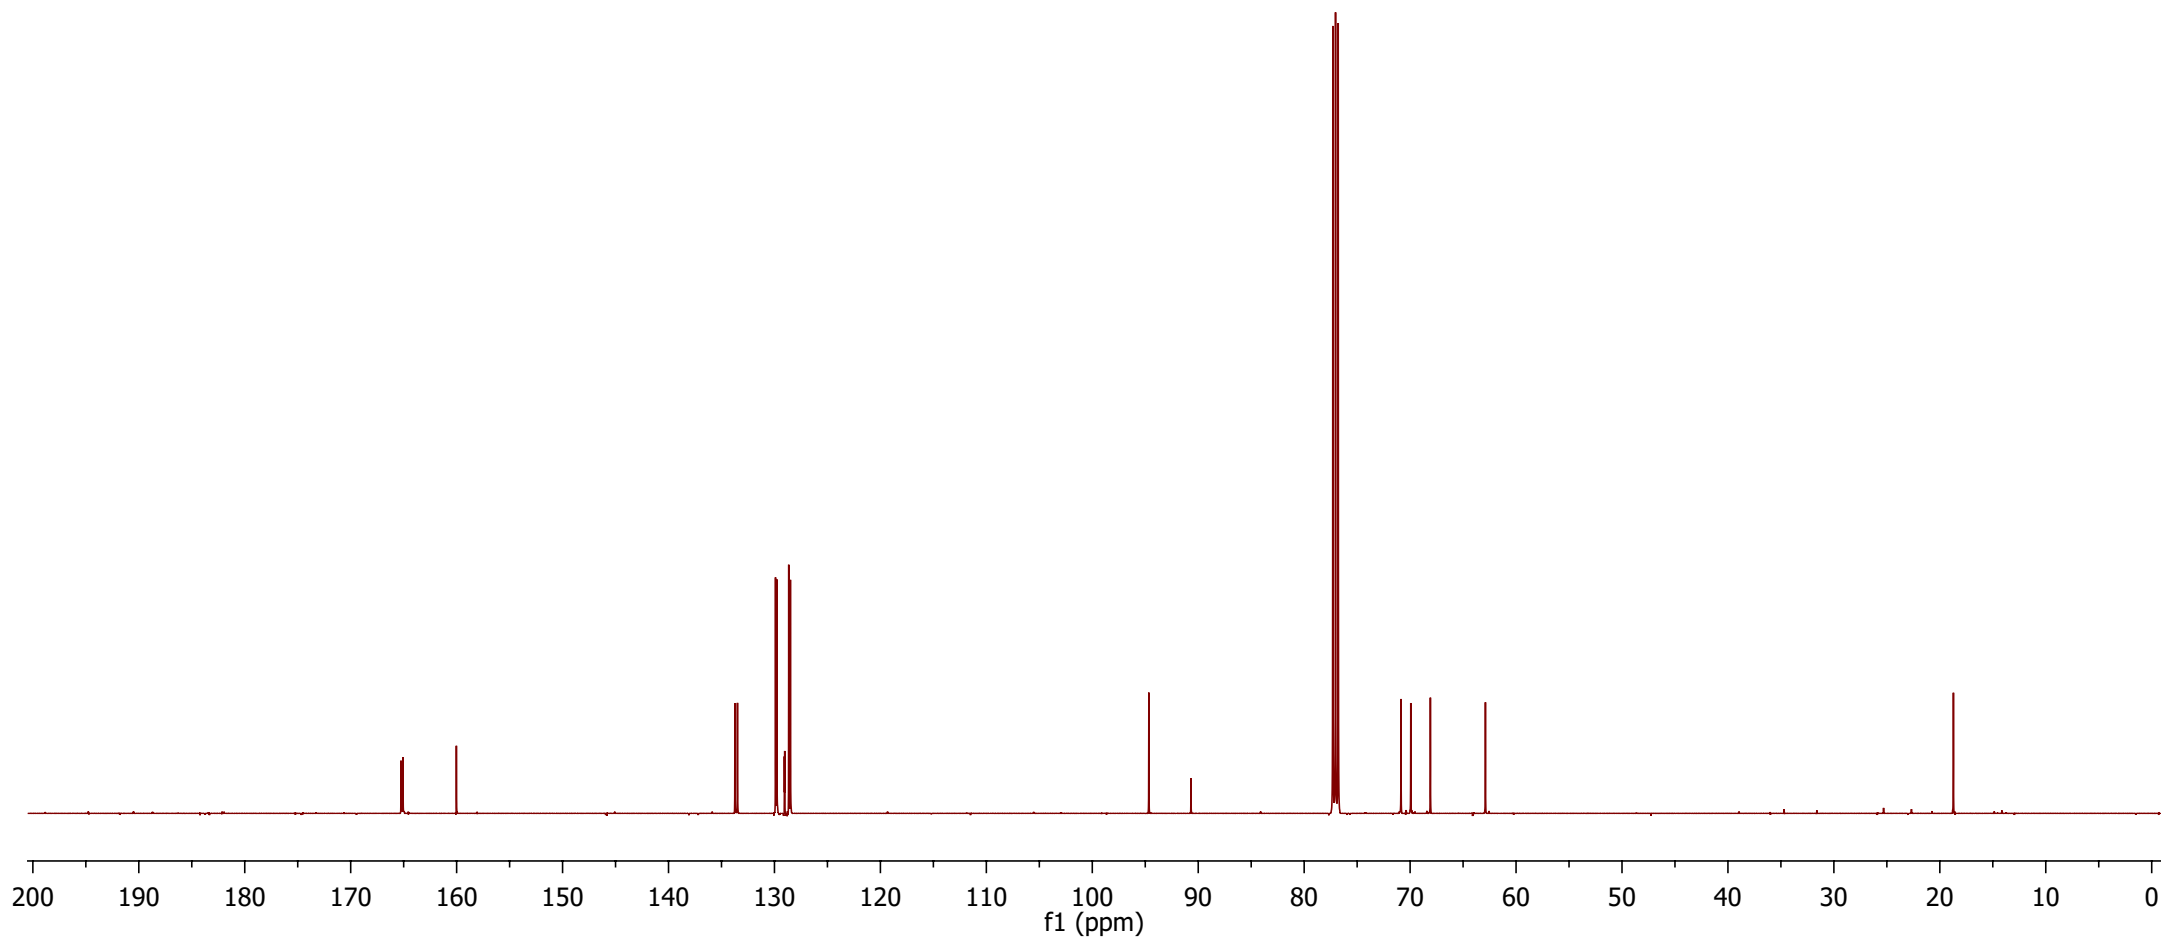

600 MHz, CDCl<sub>3</sub>

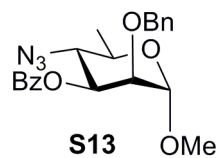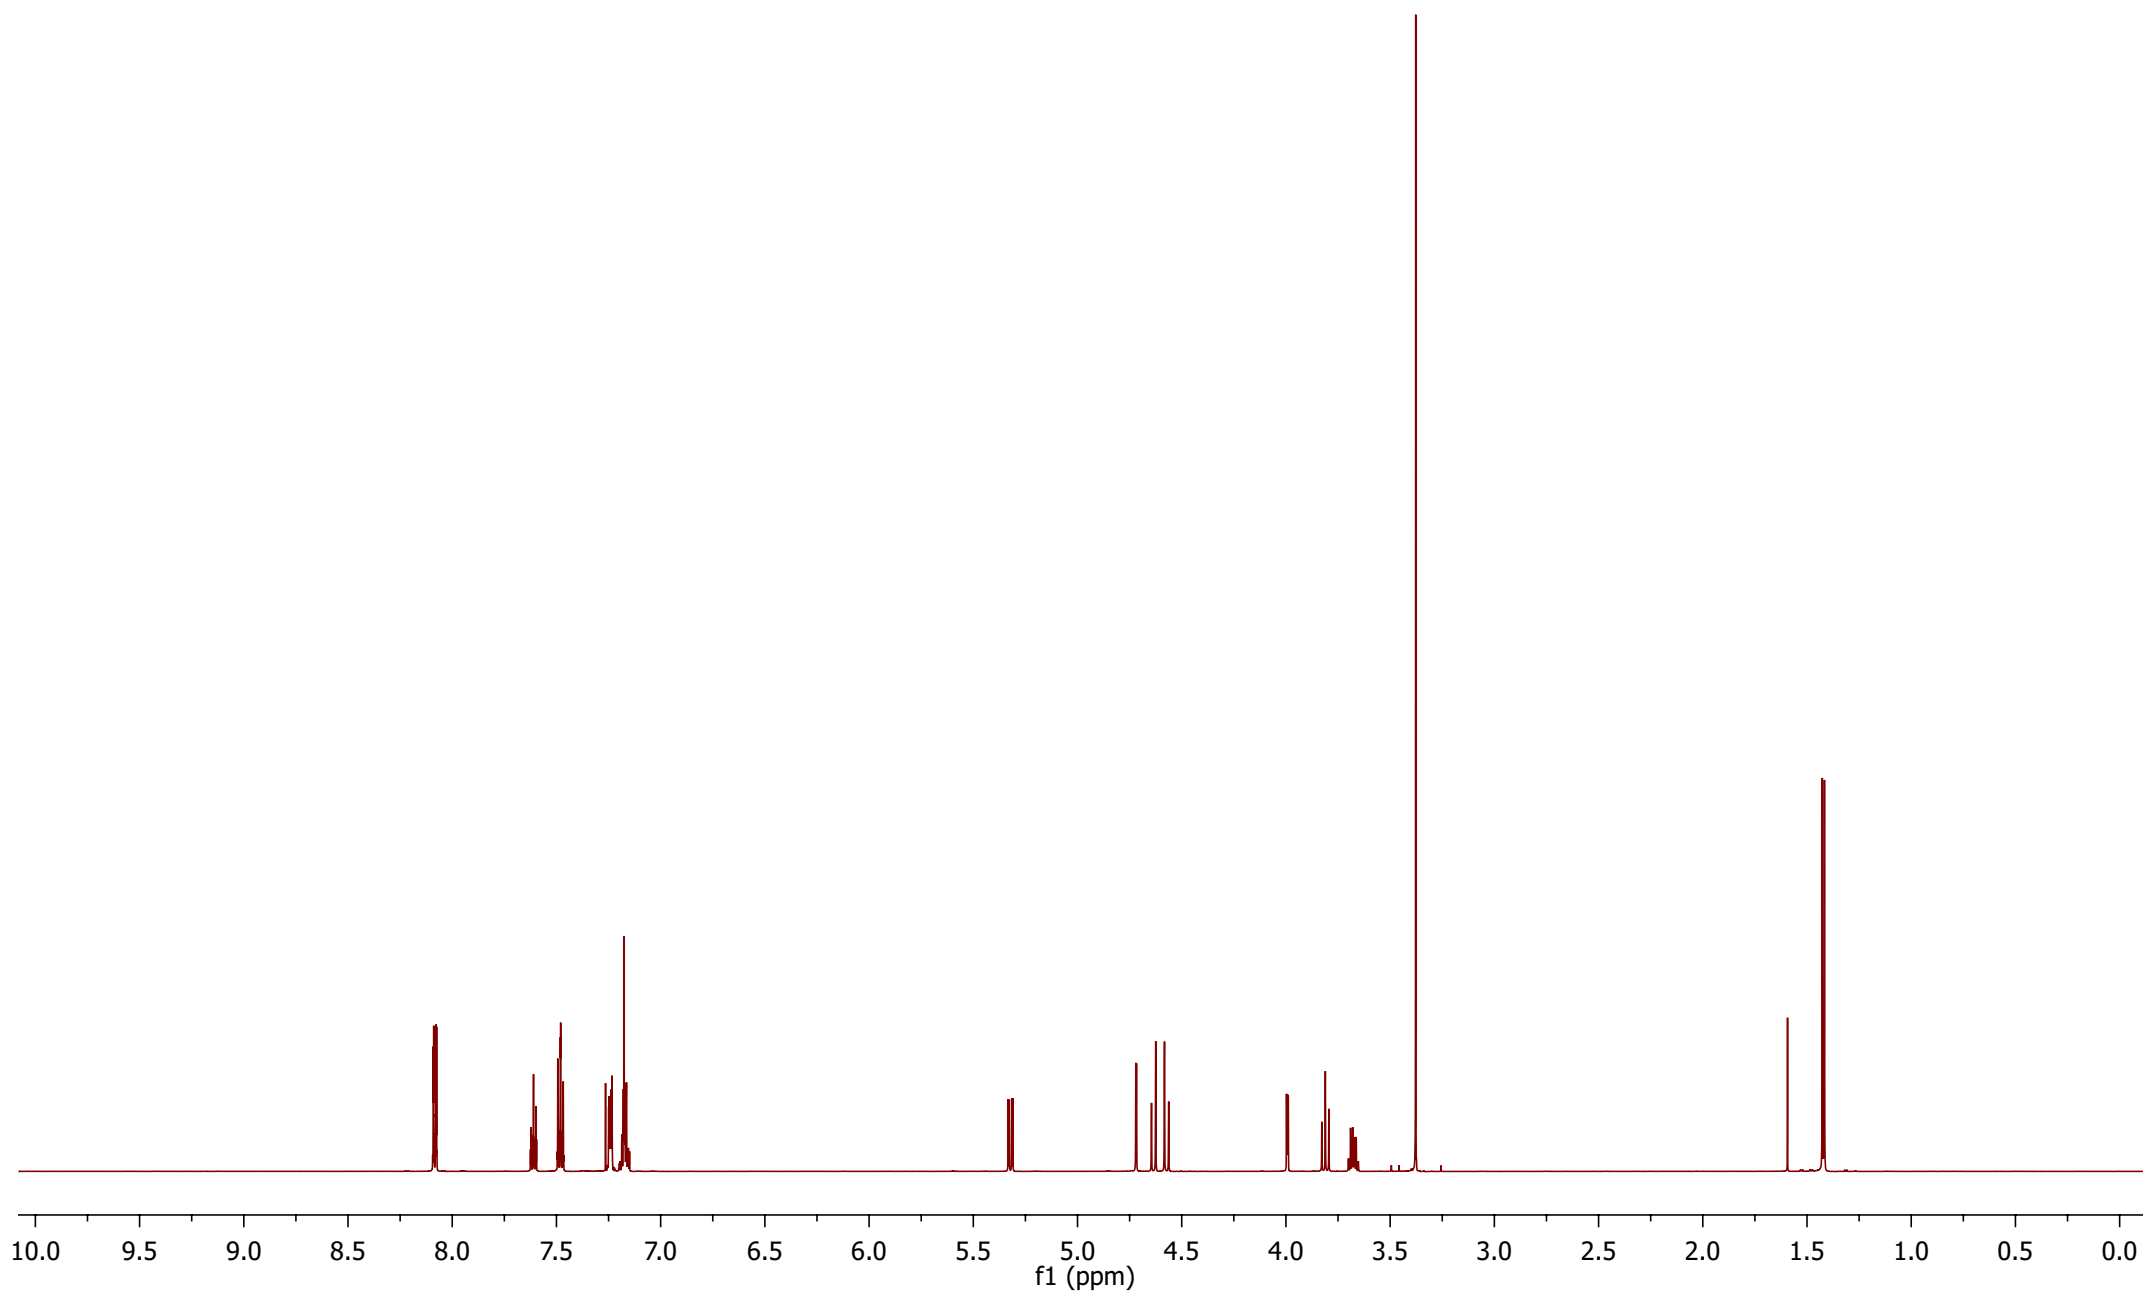

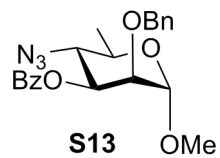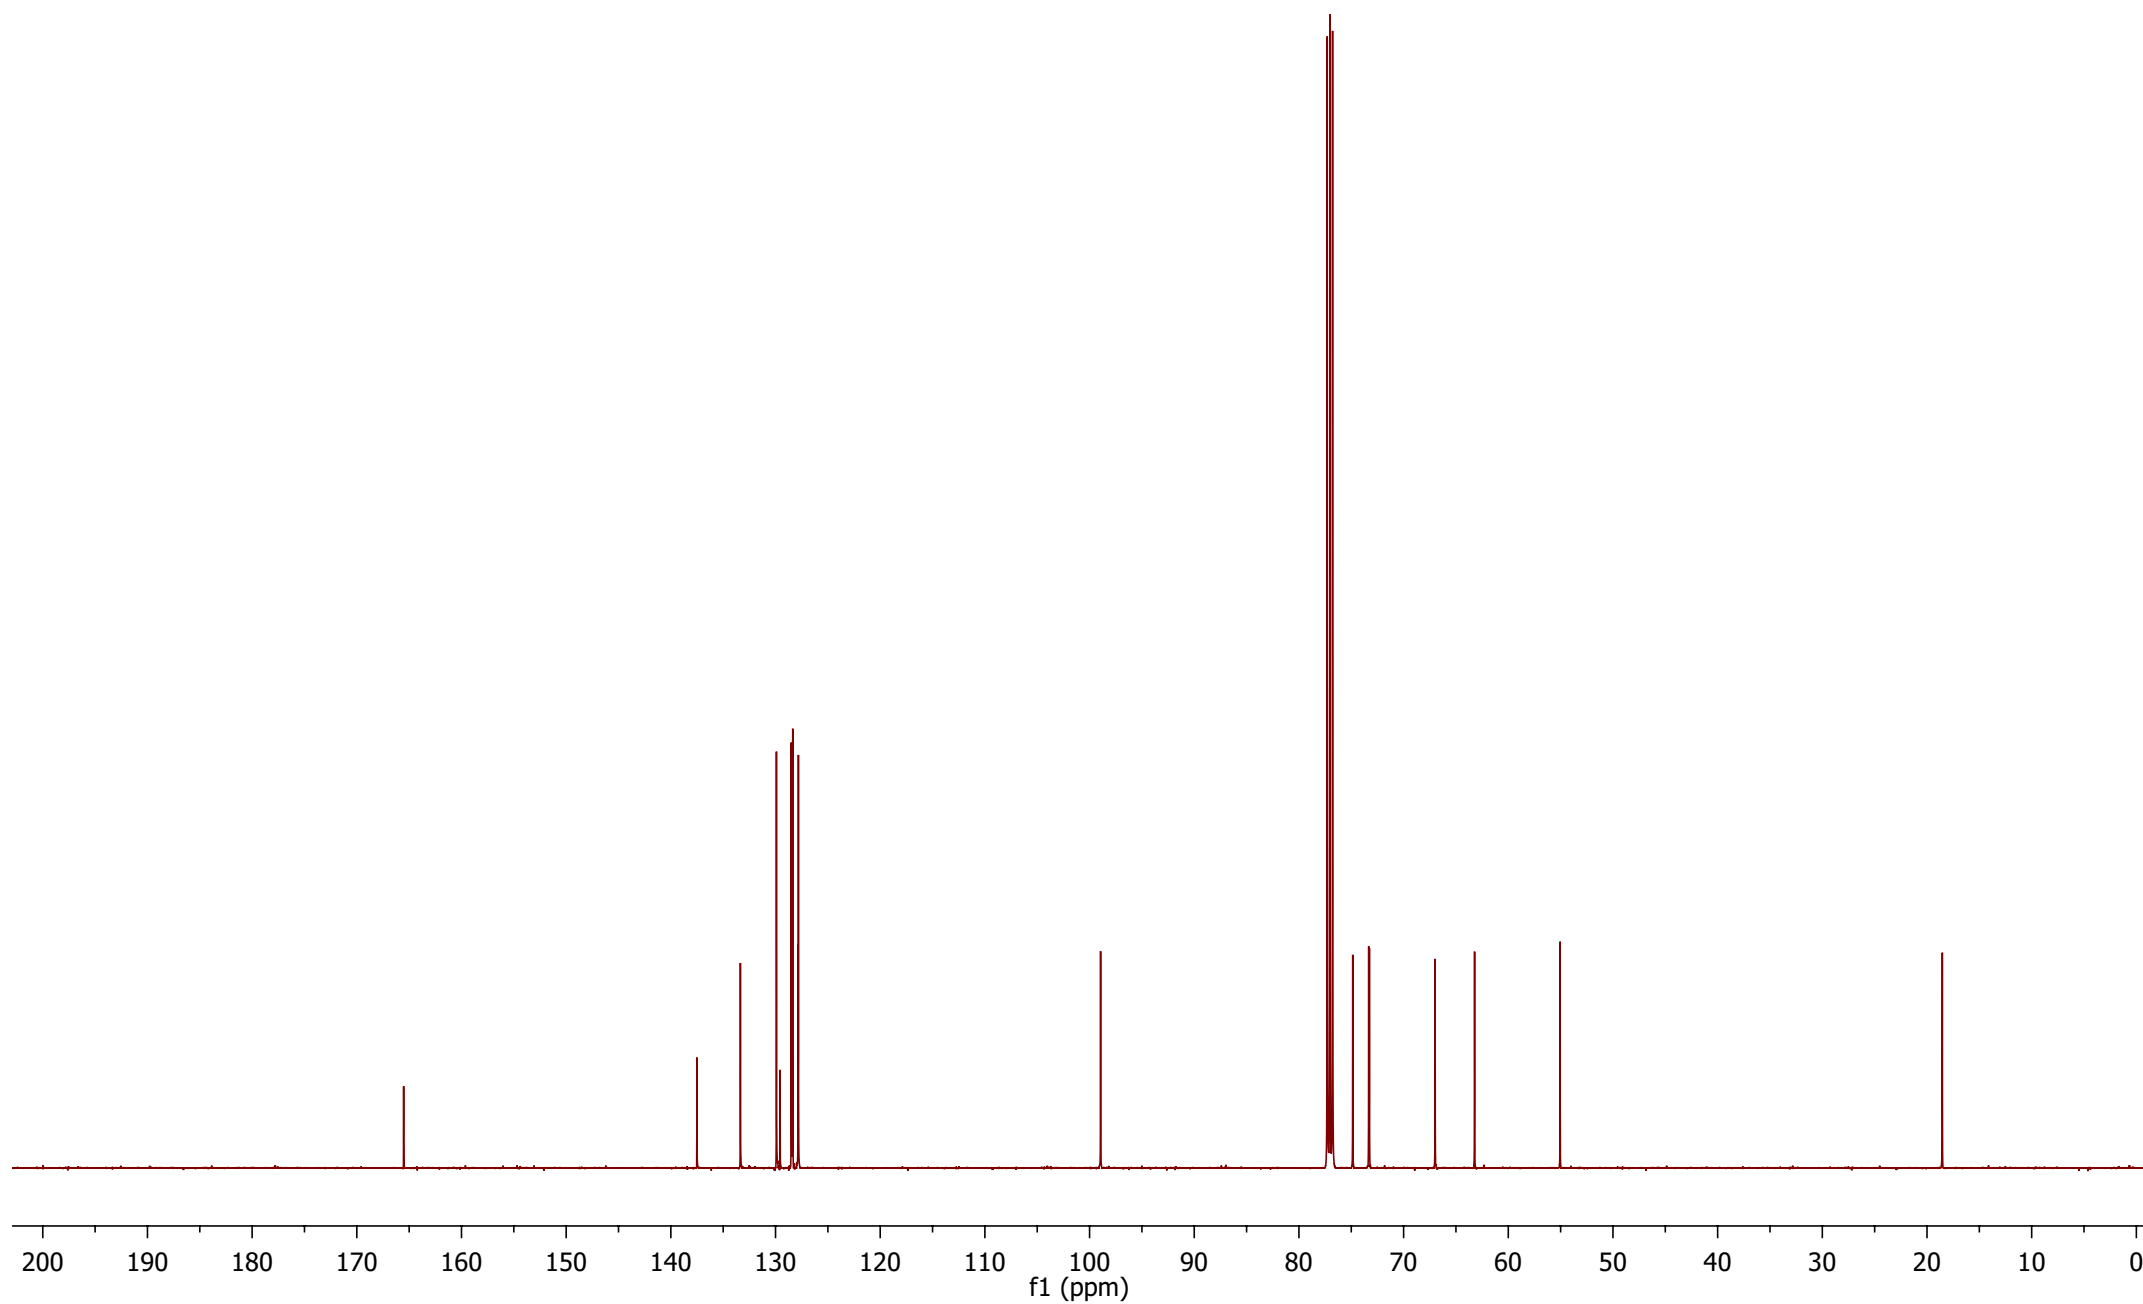

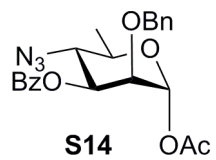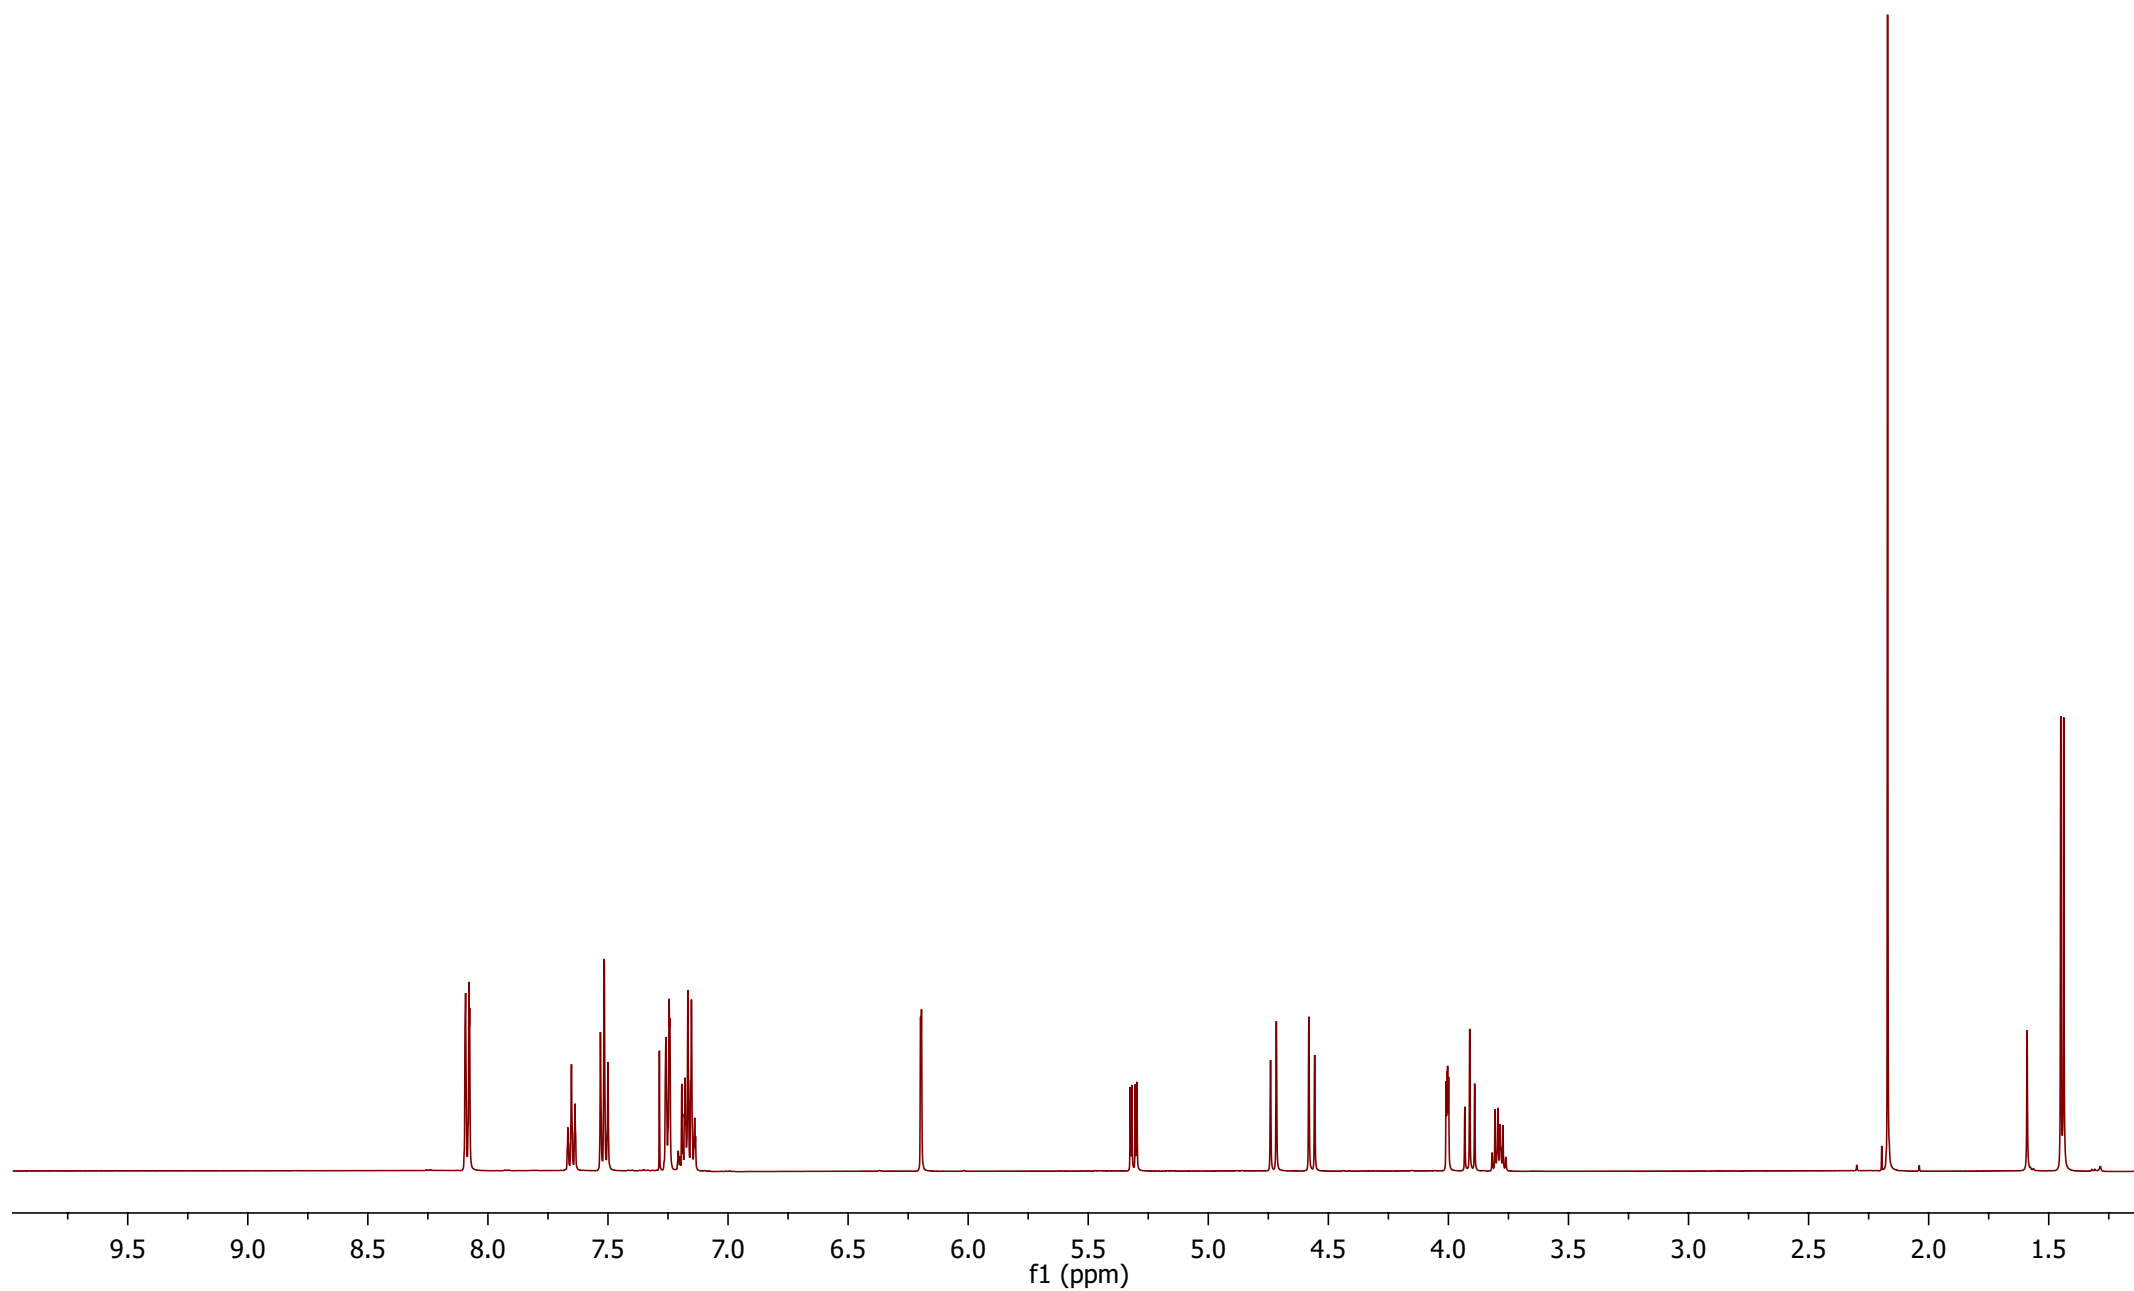

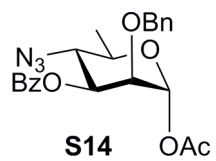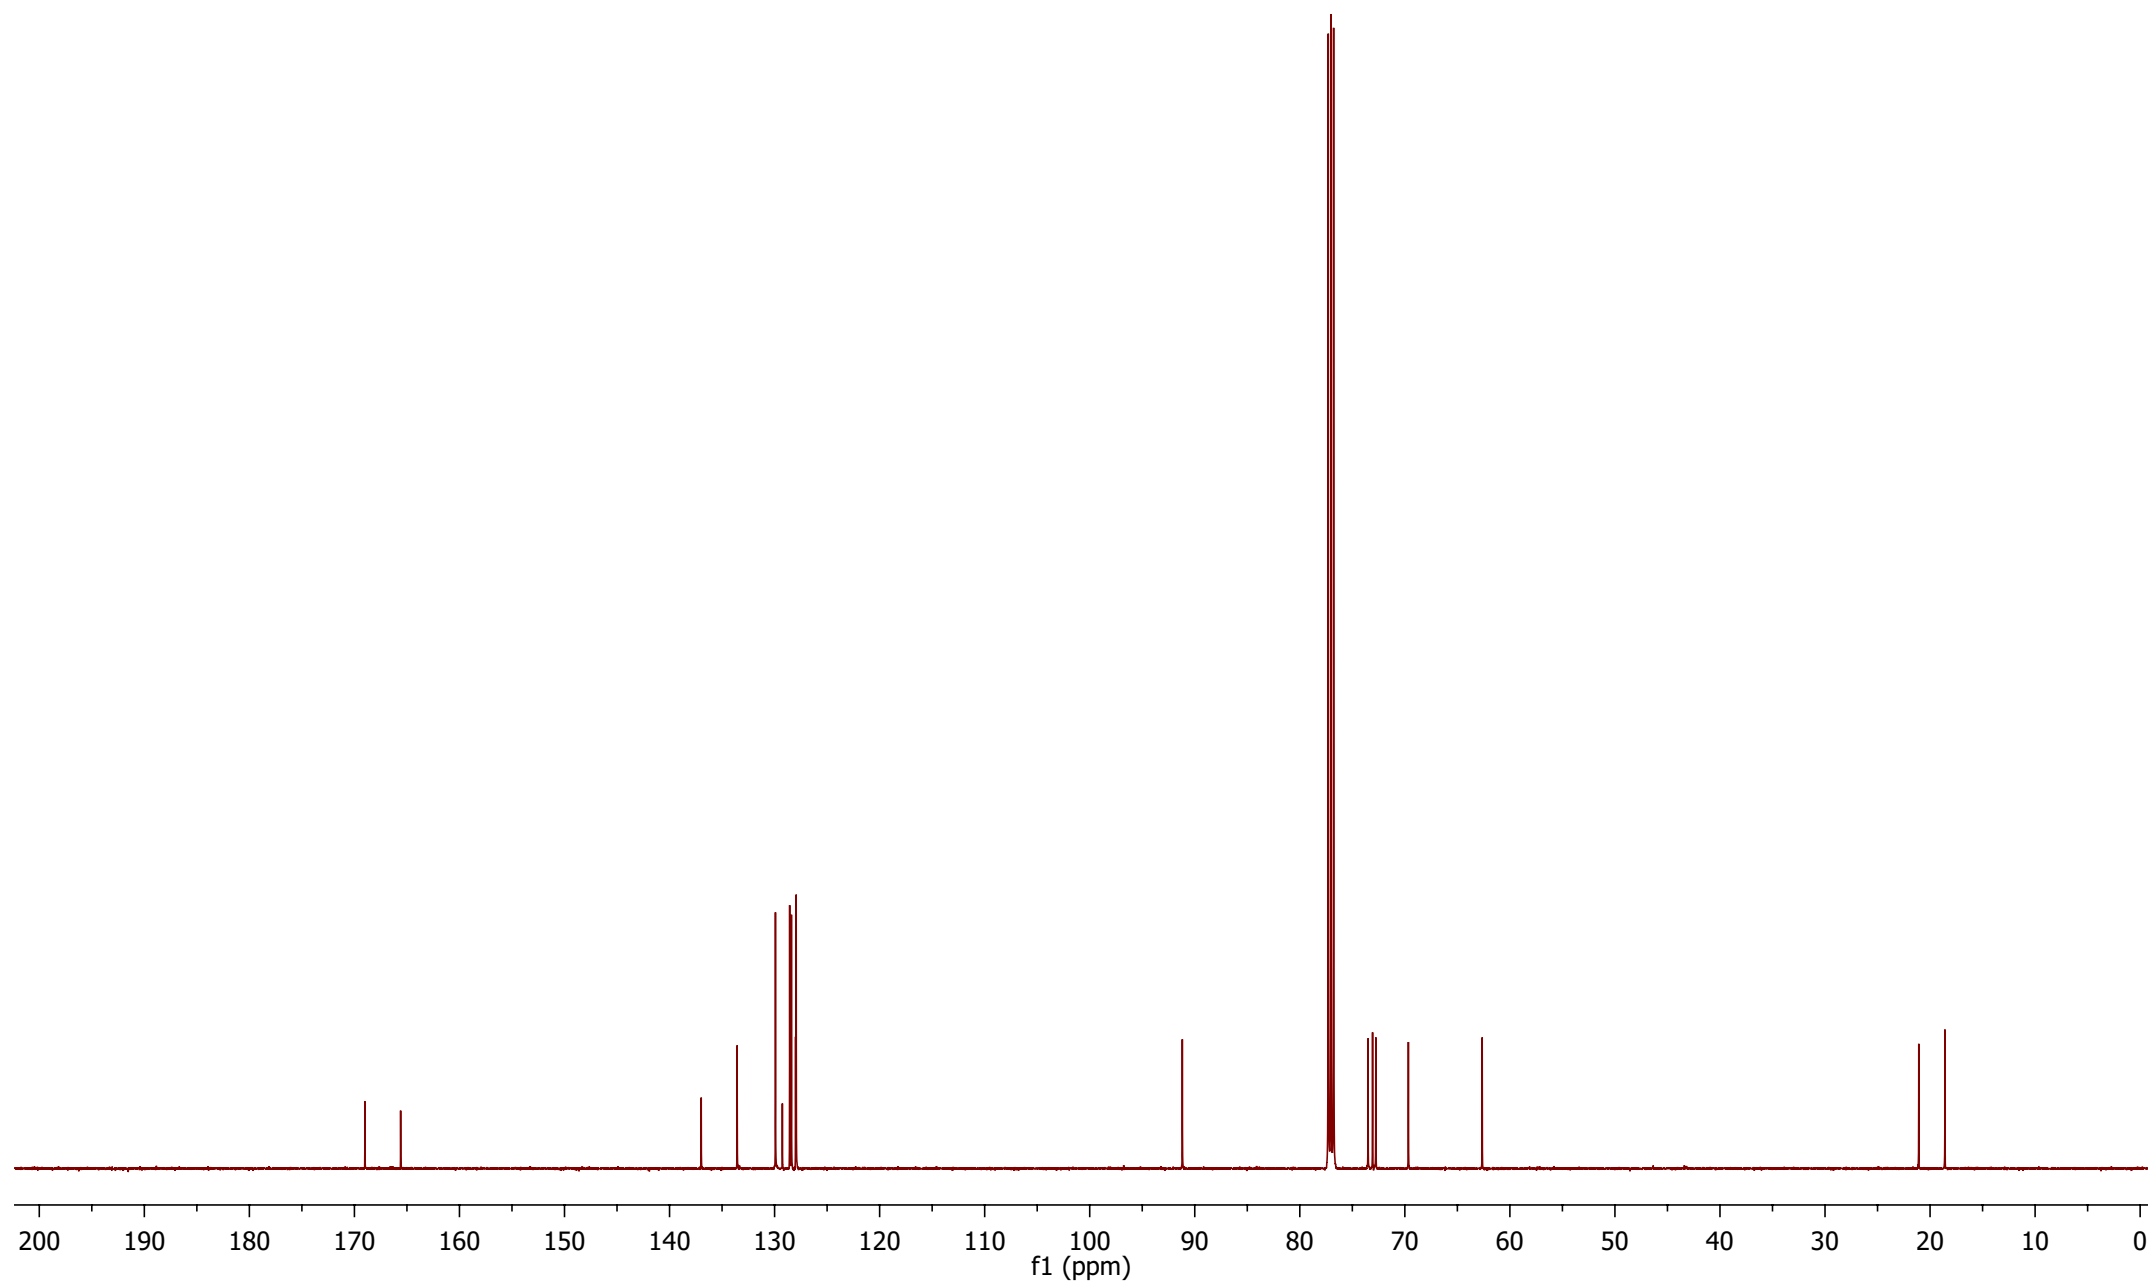

500 MHz, CDCl<sub>3</sub>

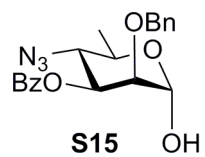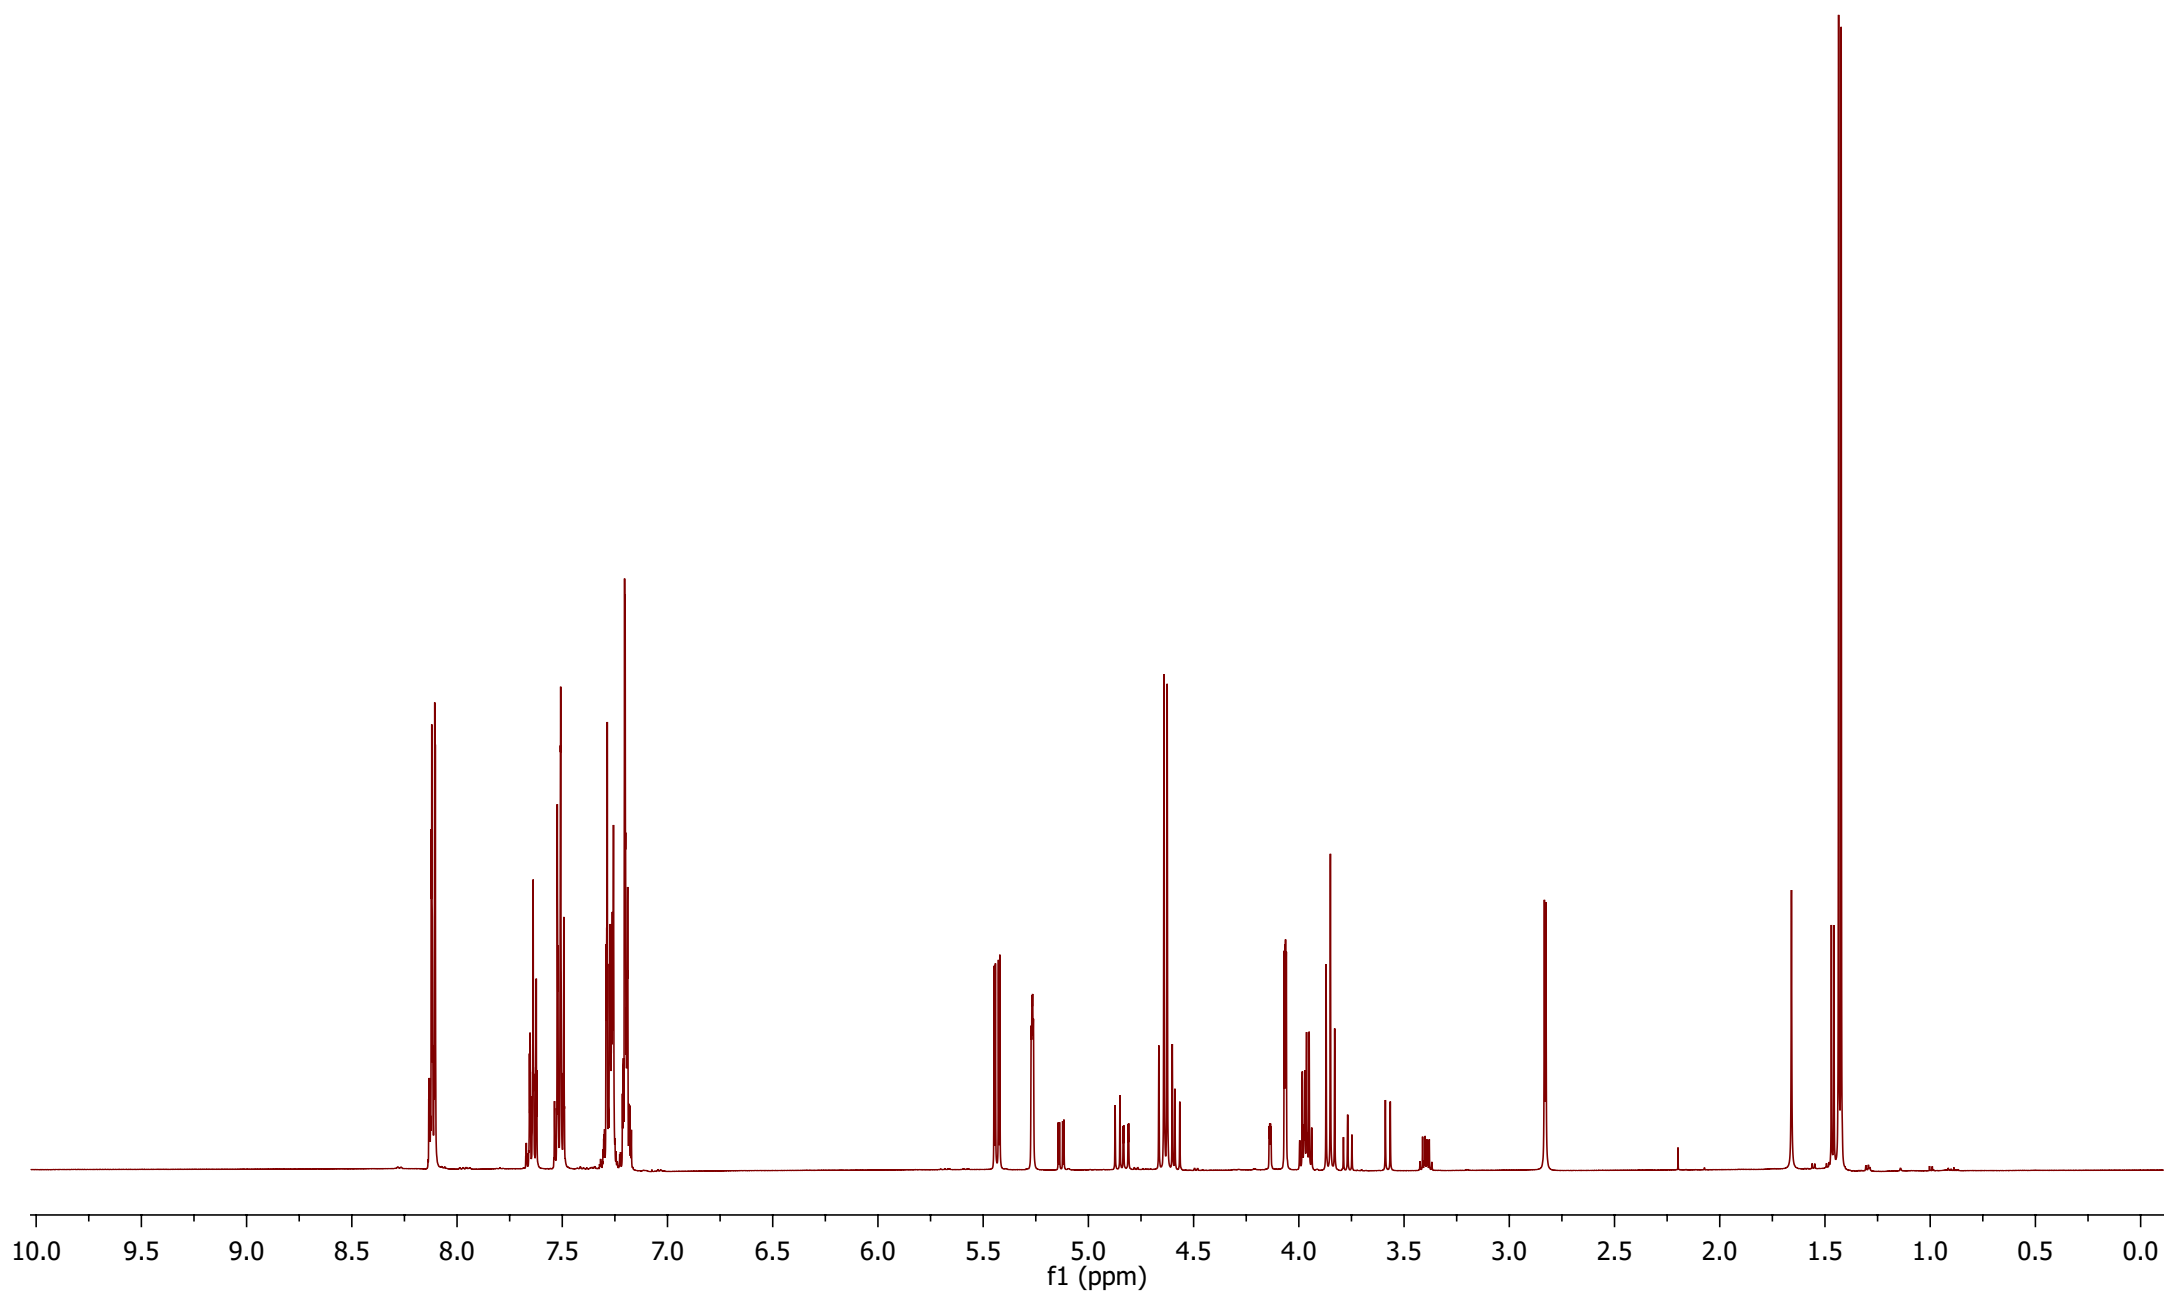

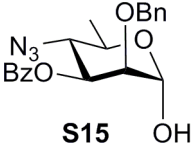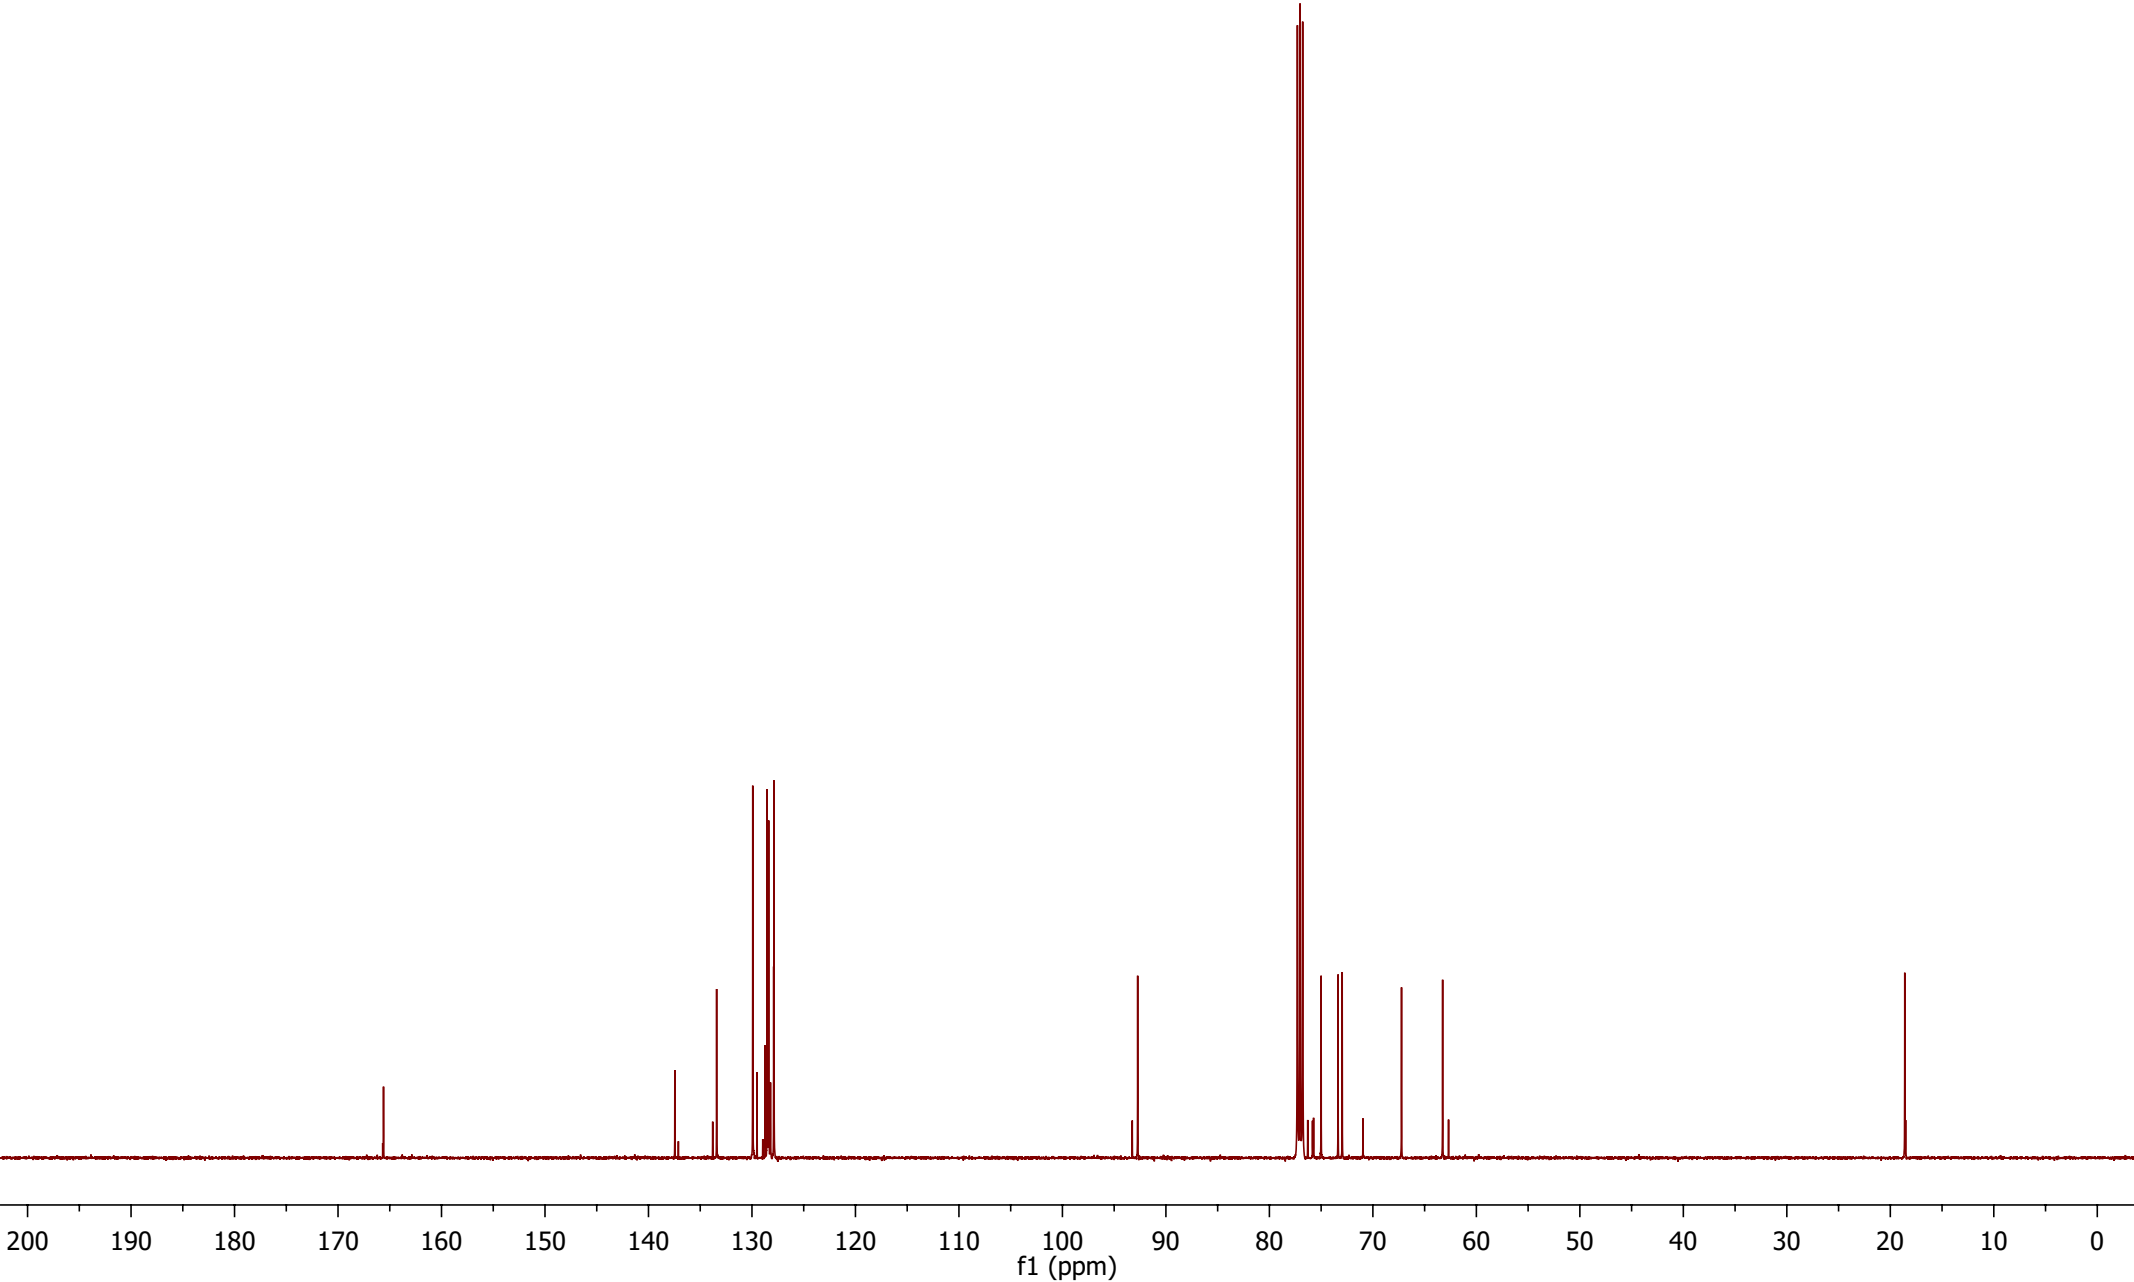



600 MHz, CDCl<sub>3</sub>

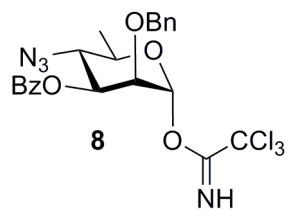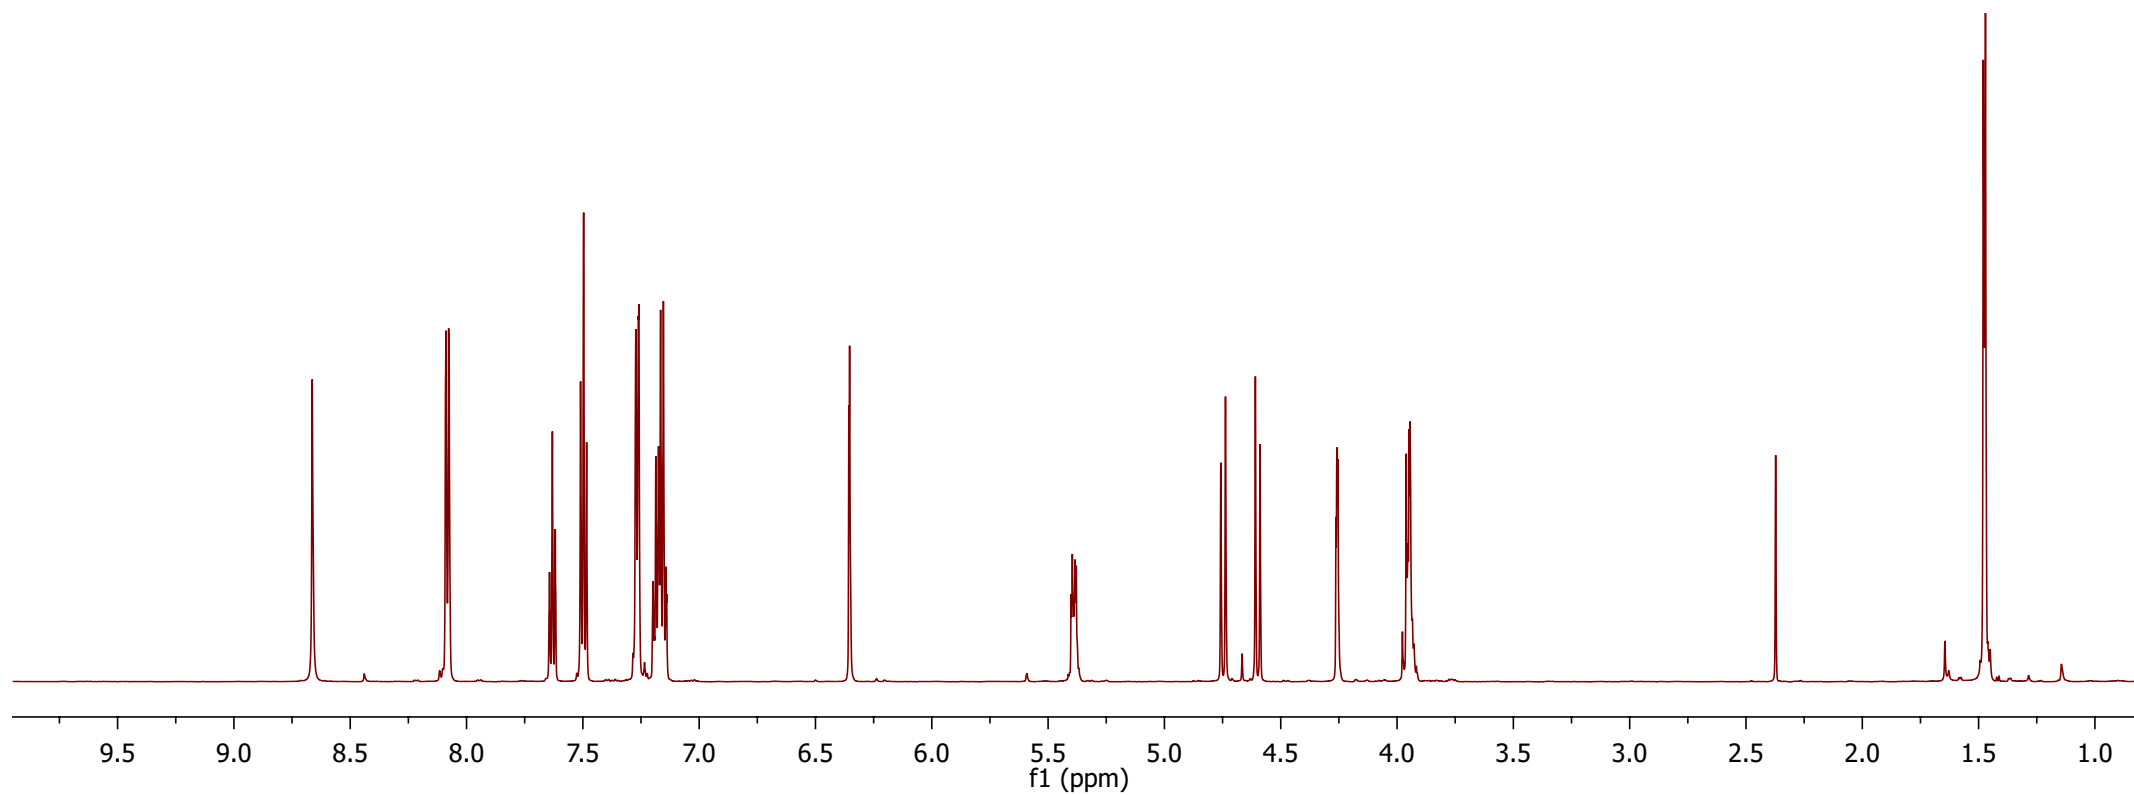

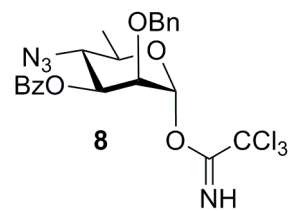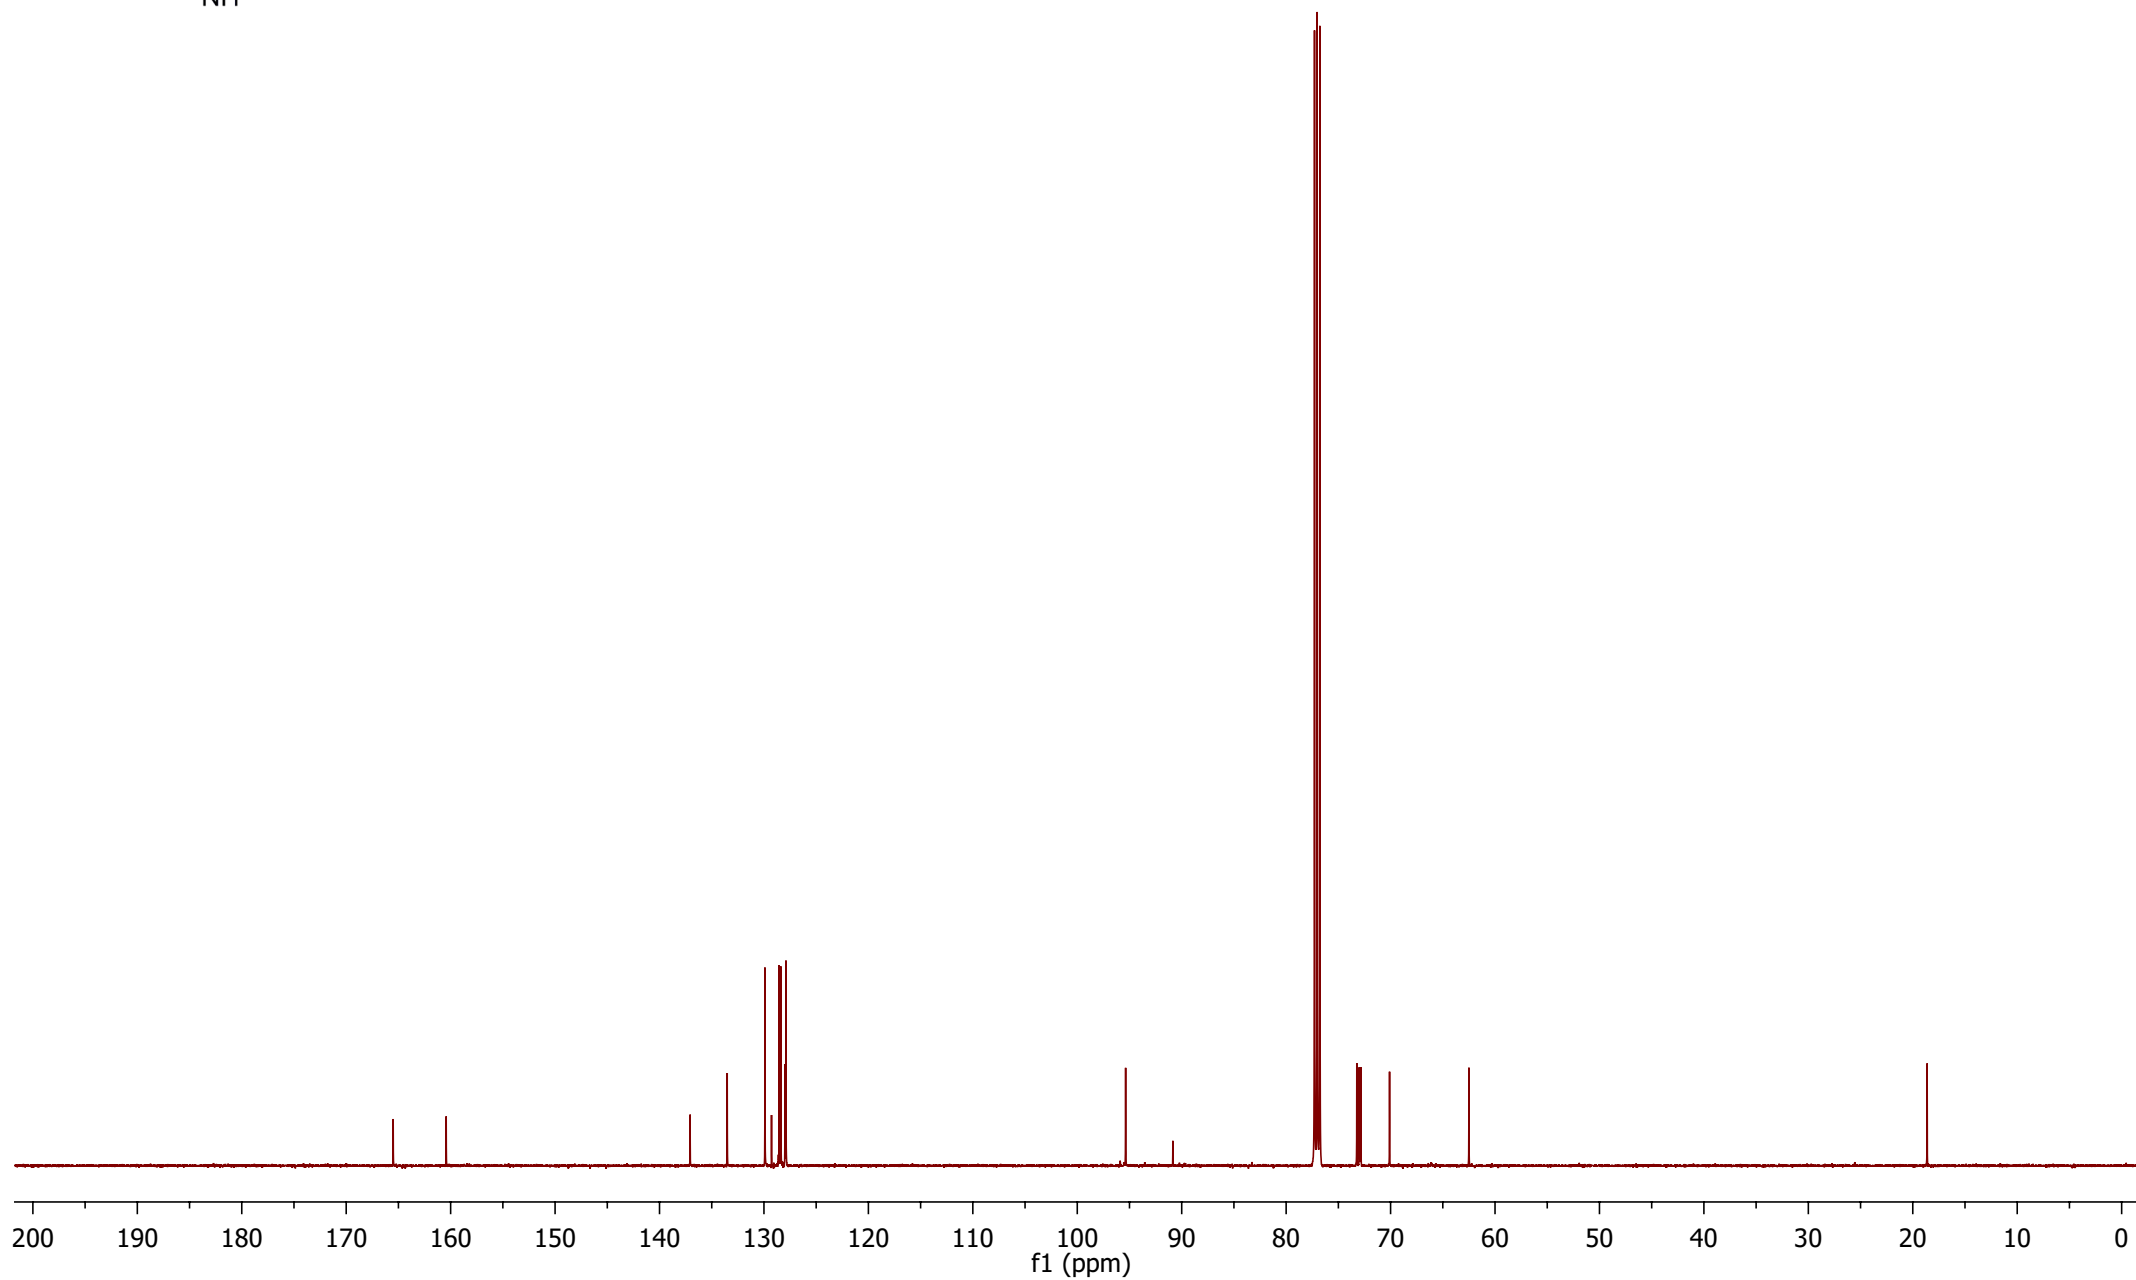

500 MHz, CDCl<sub>3</sub>

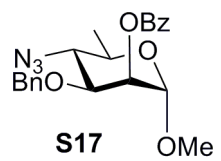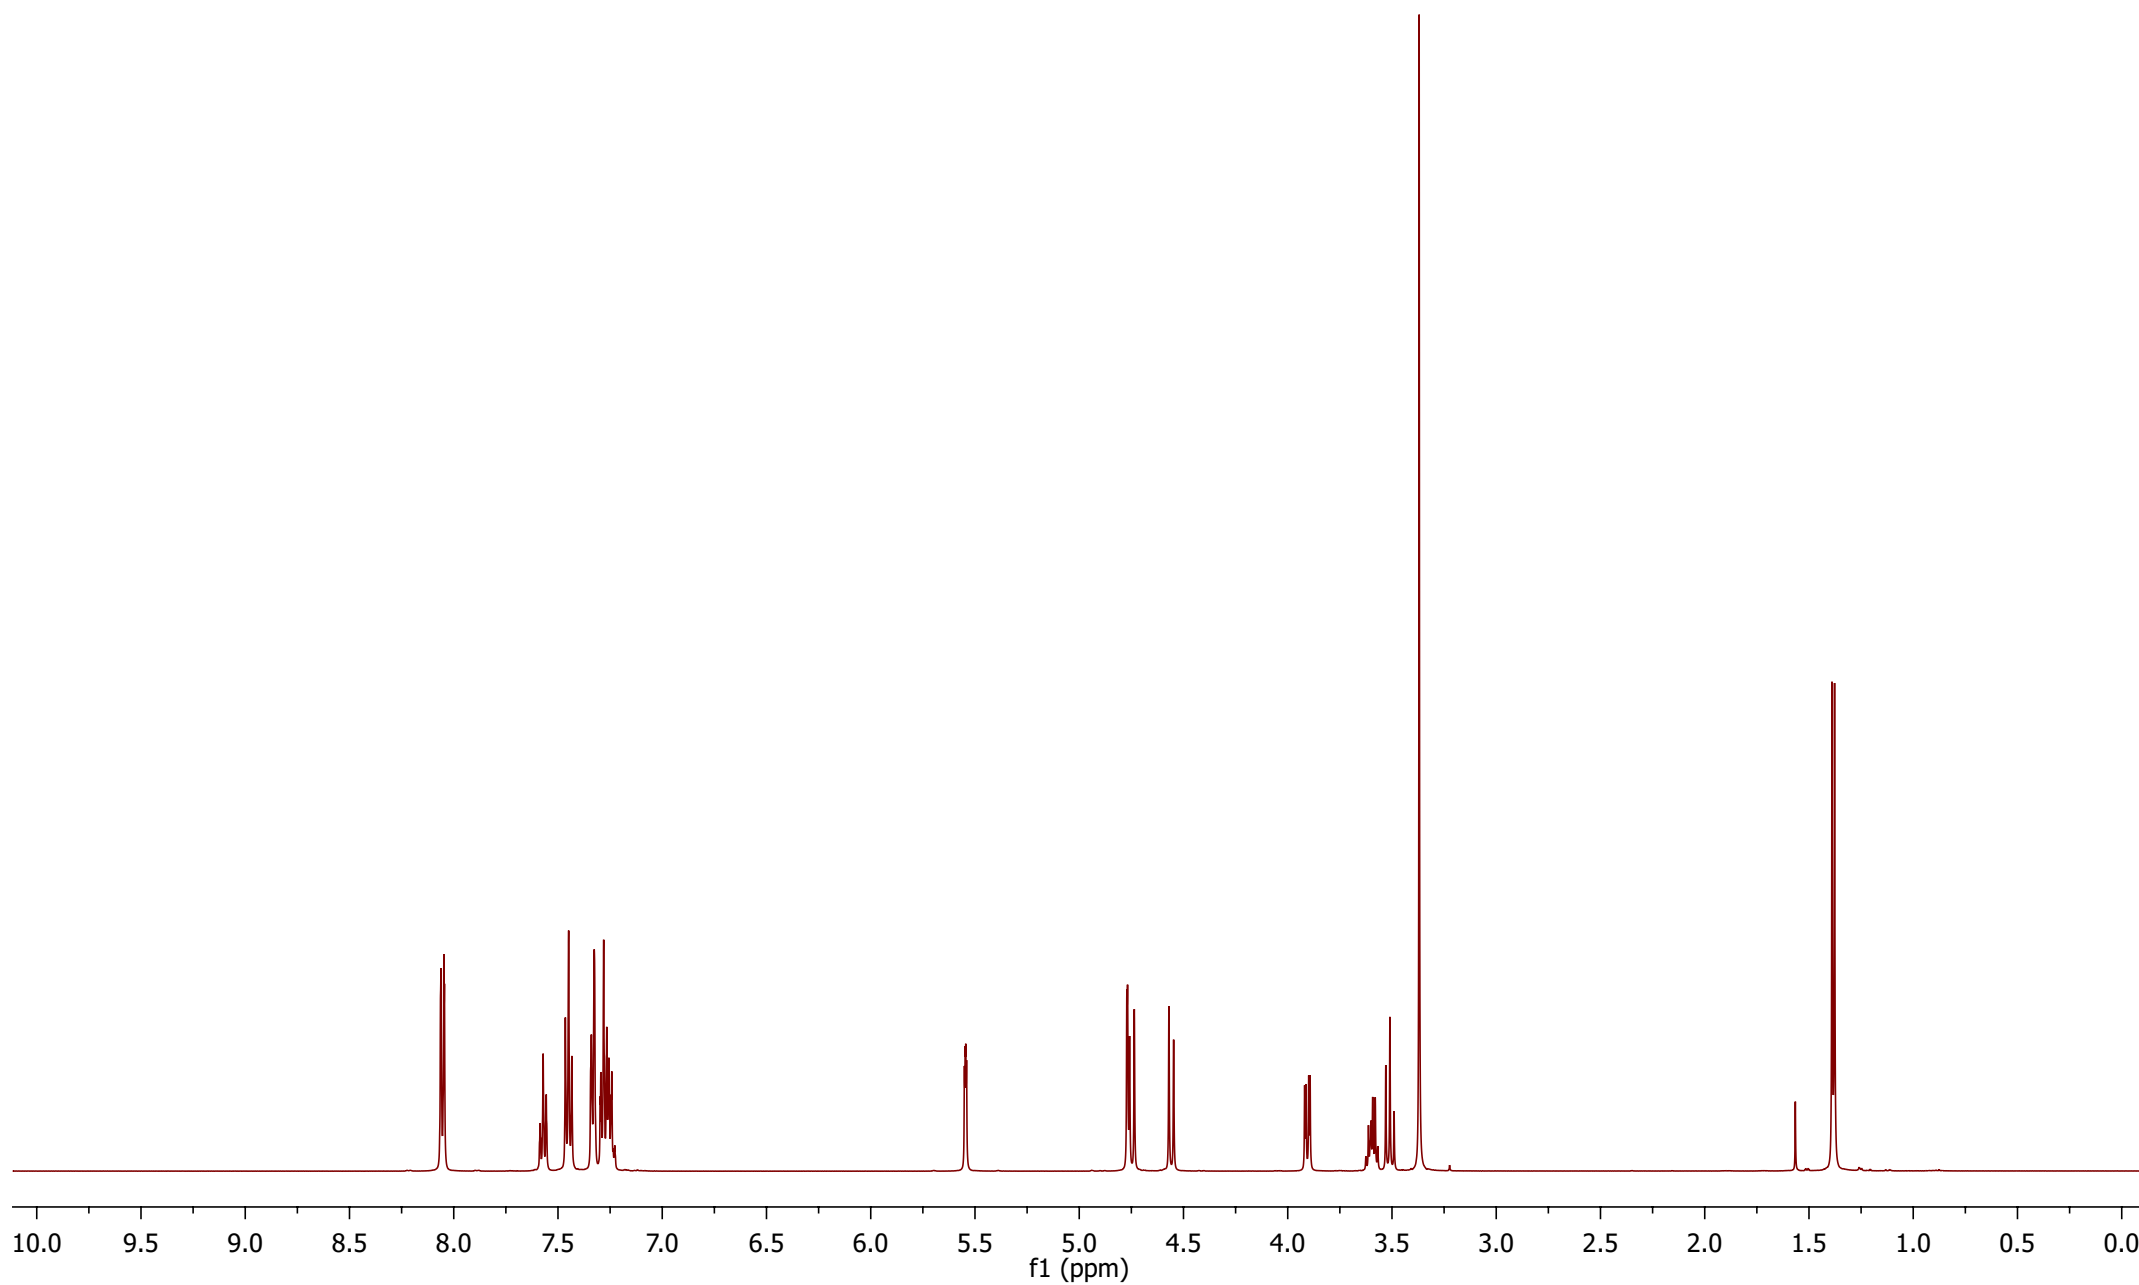

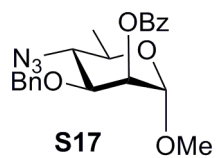

126 MHz, CDCl<sub>3</sub>

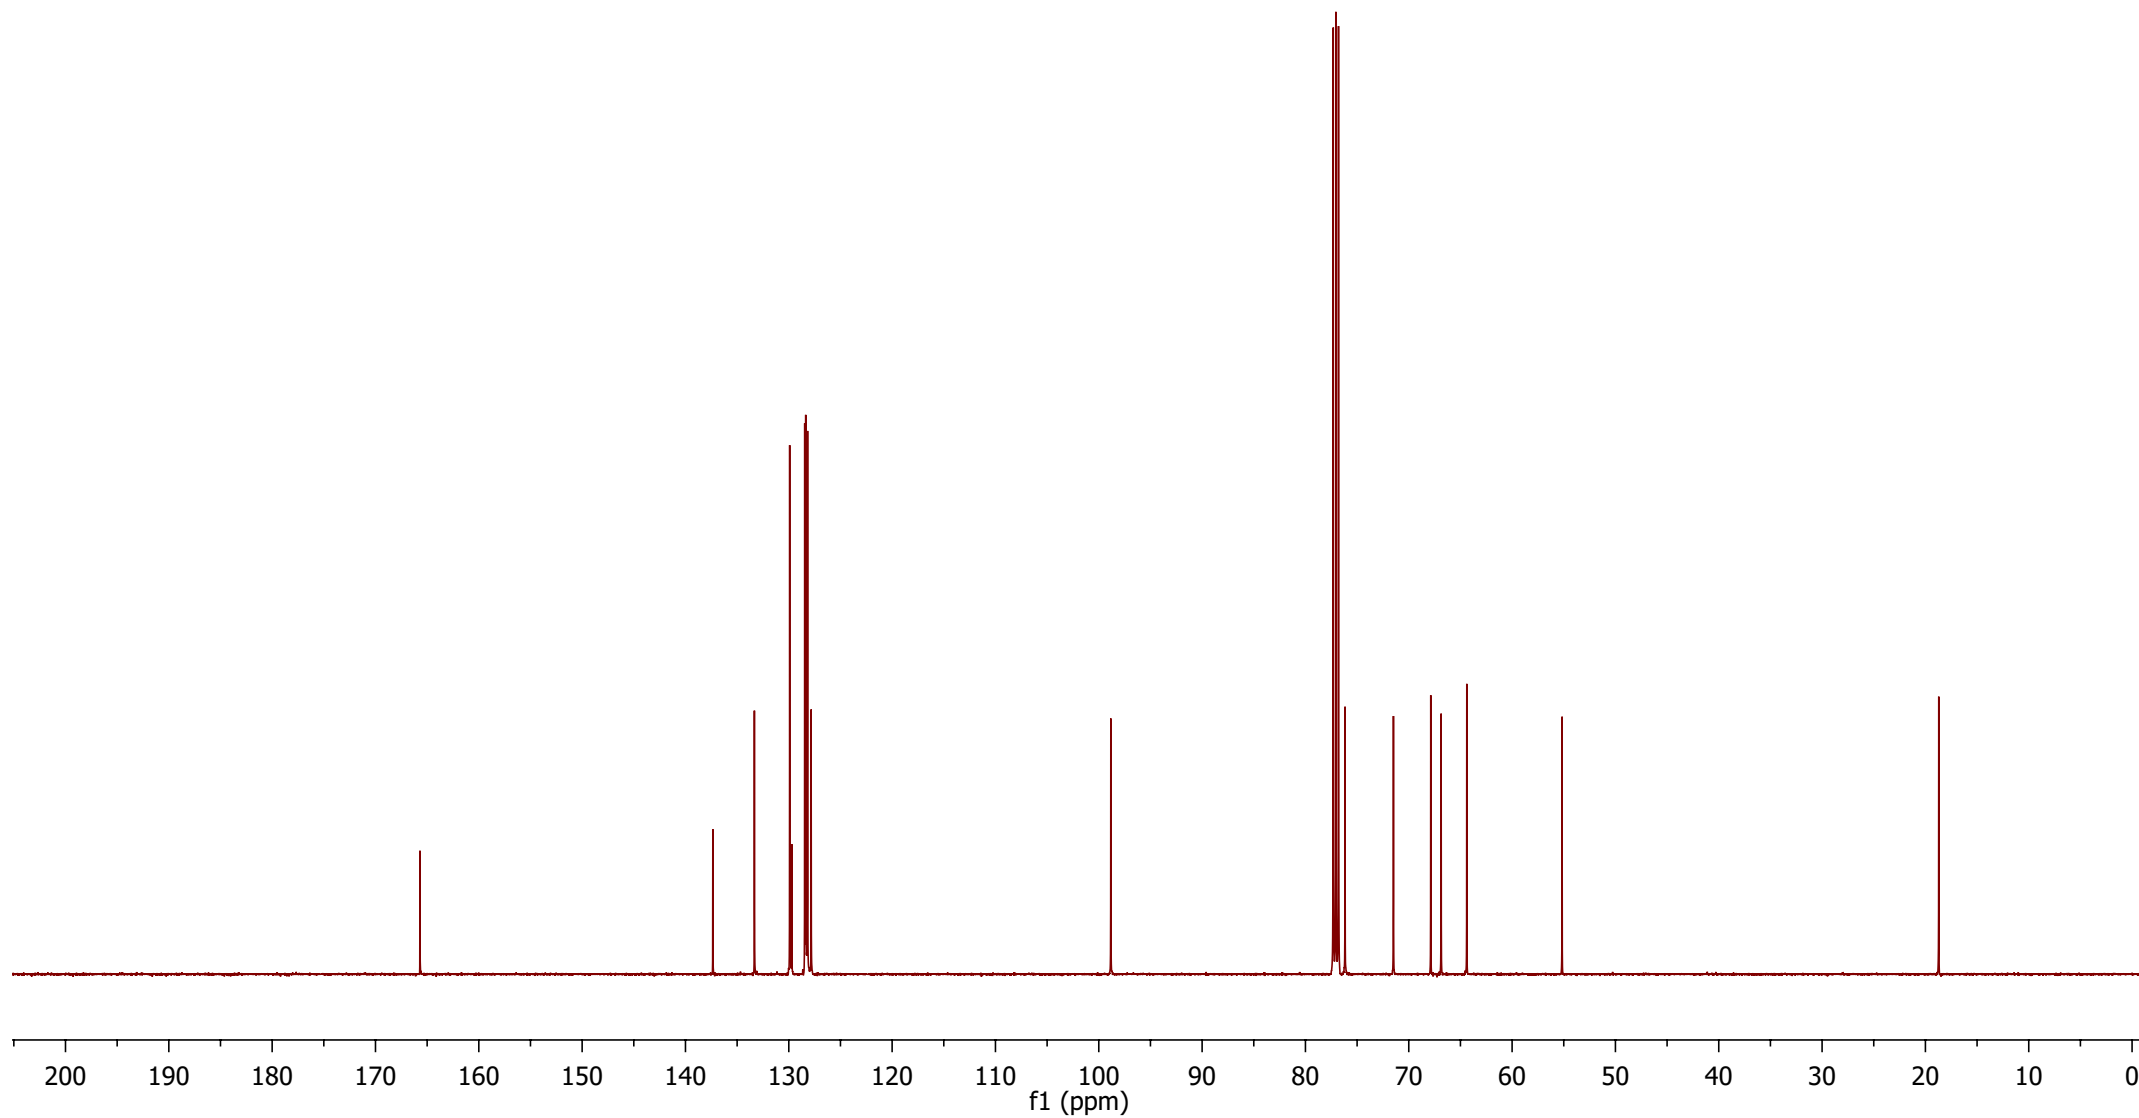

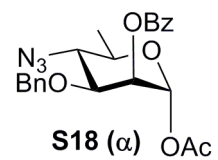

500 MHz, CDCl<sub>3</sub>

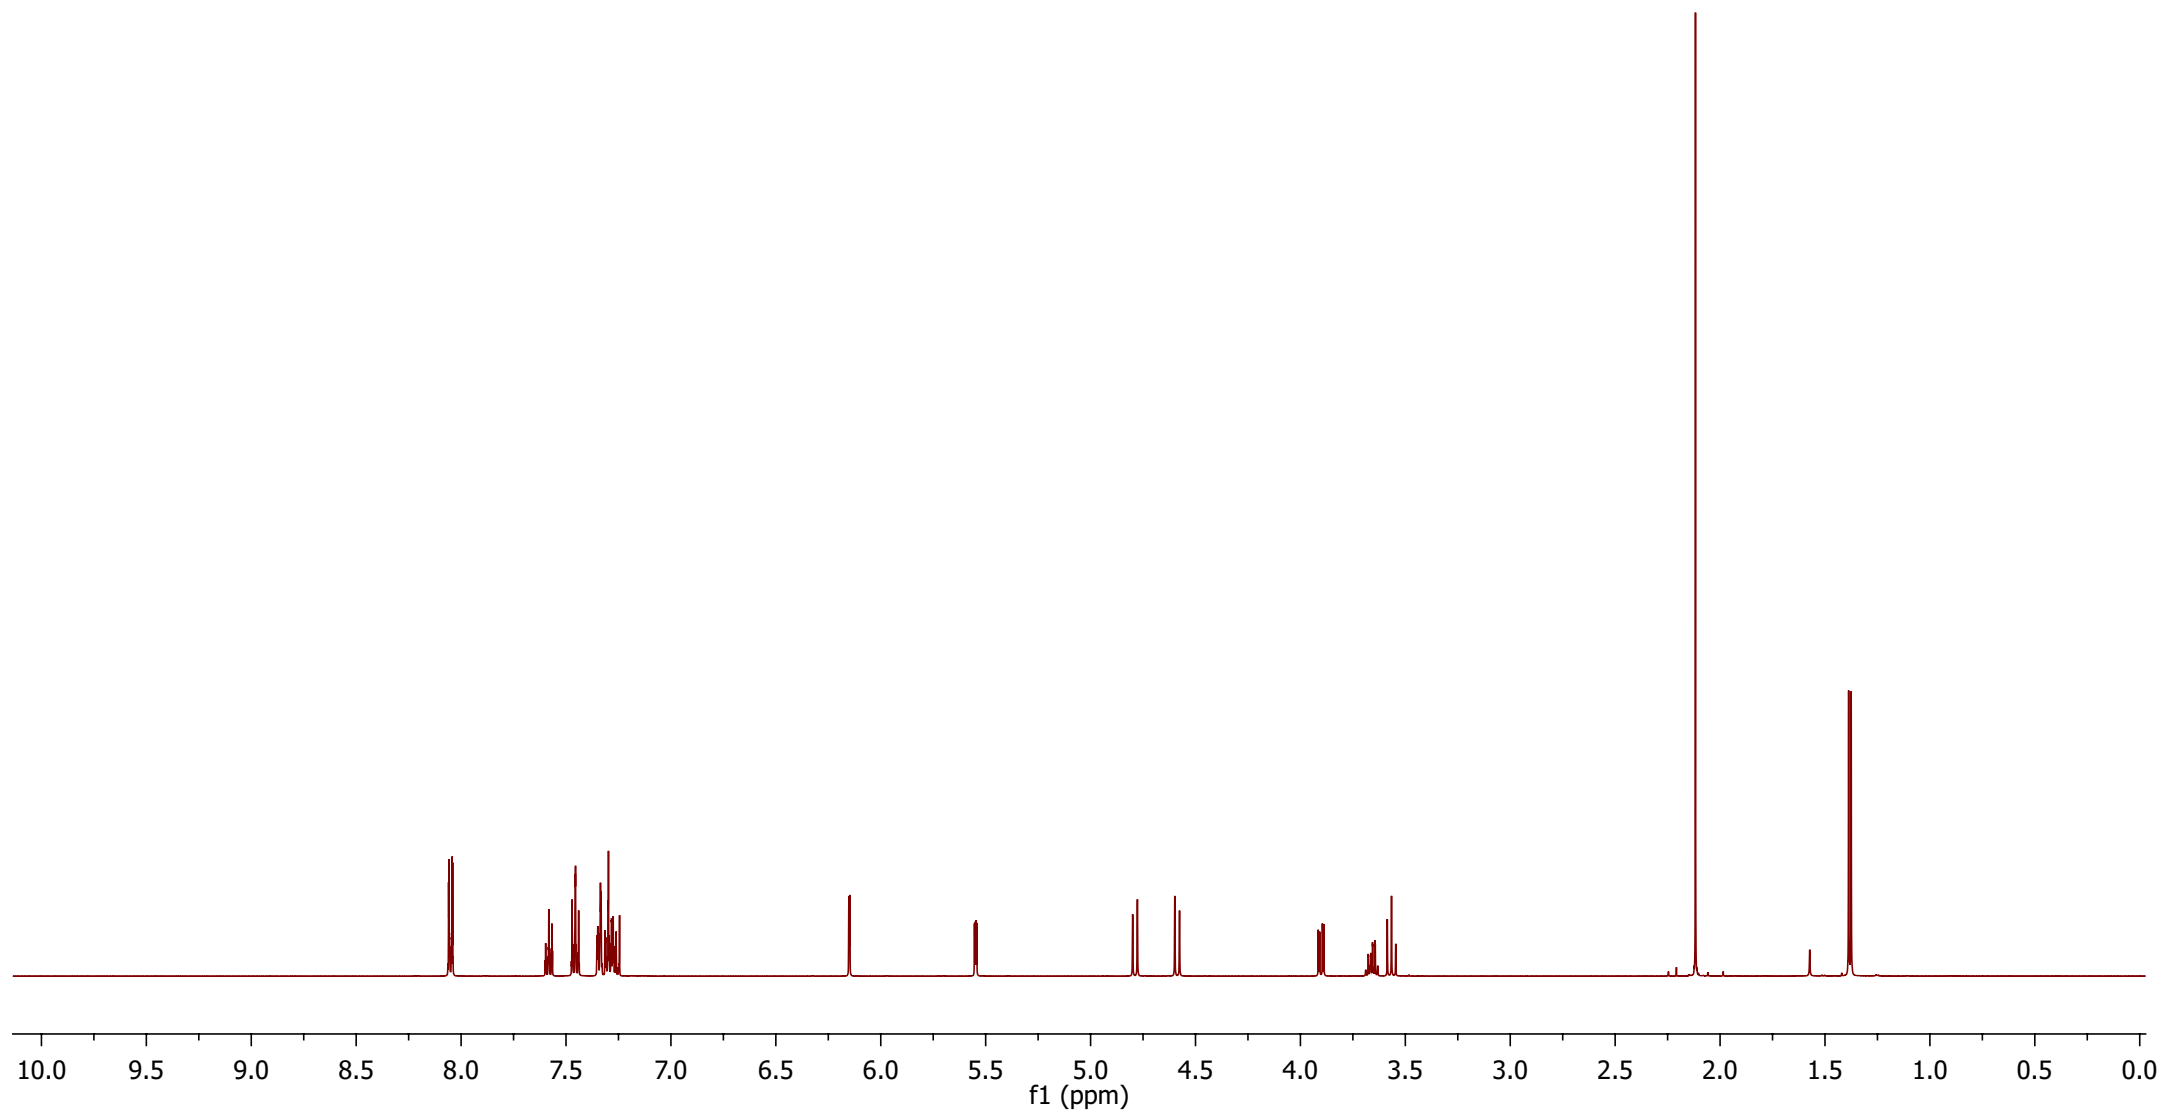

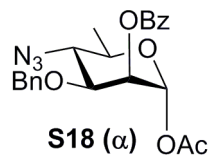

126 MHz, CDCl<sub>3</sub>

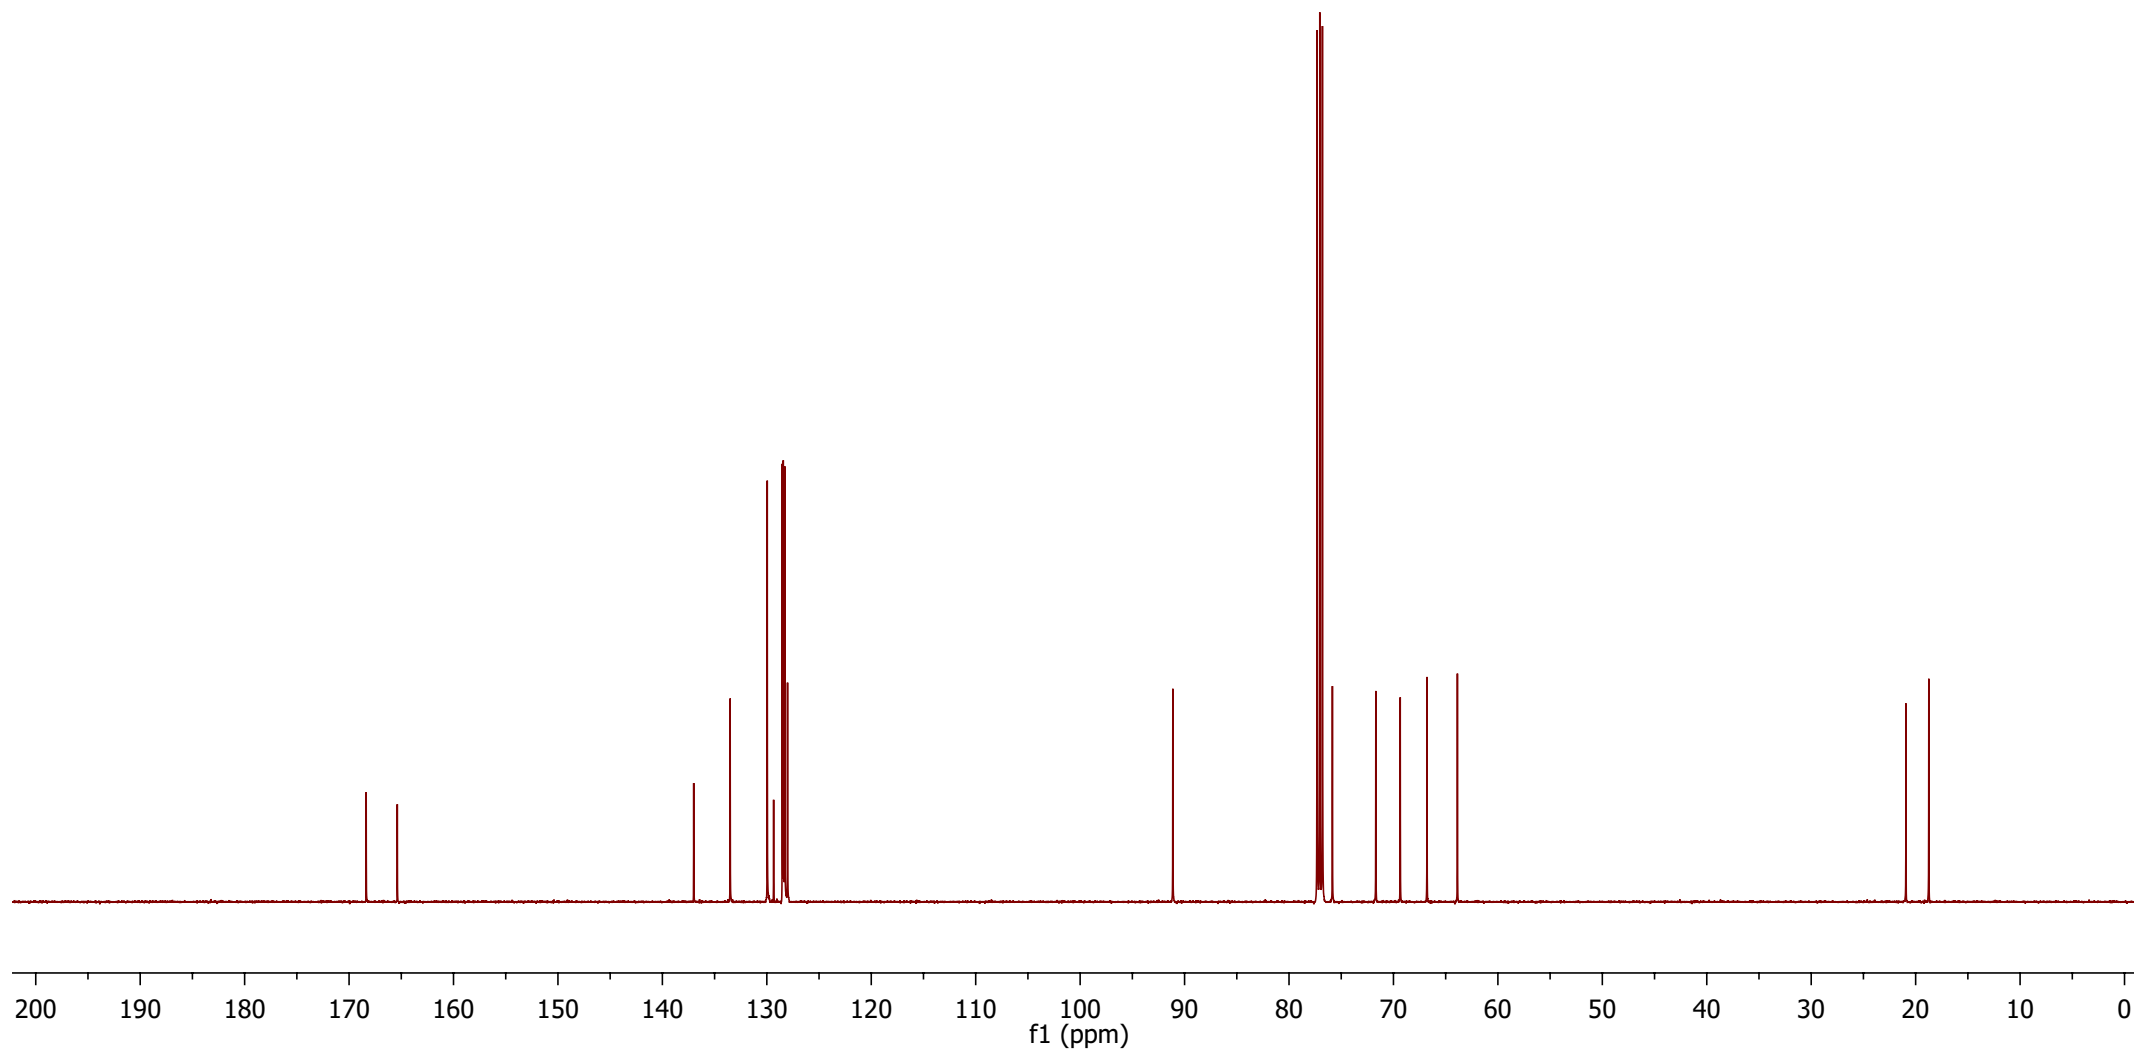

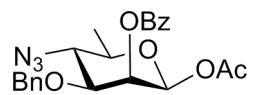

**S18** ( $\beta$ )

500 MHz, CDCl<sub>3</sub>

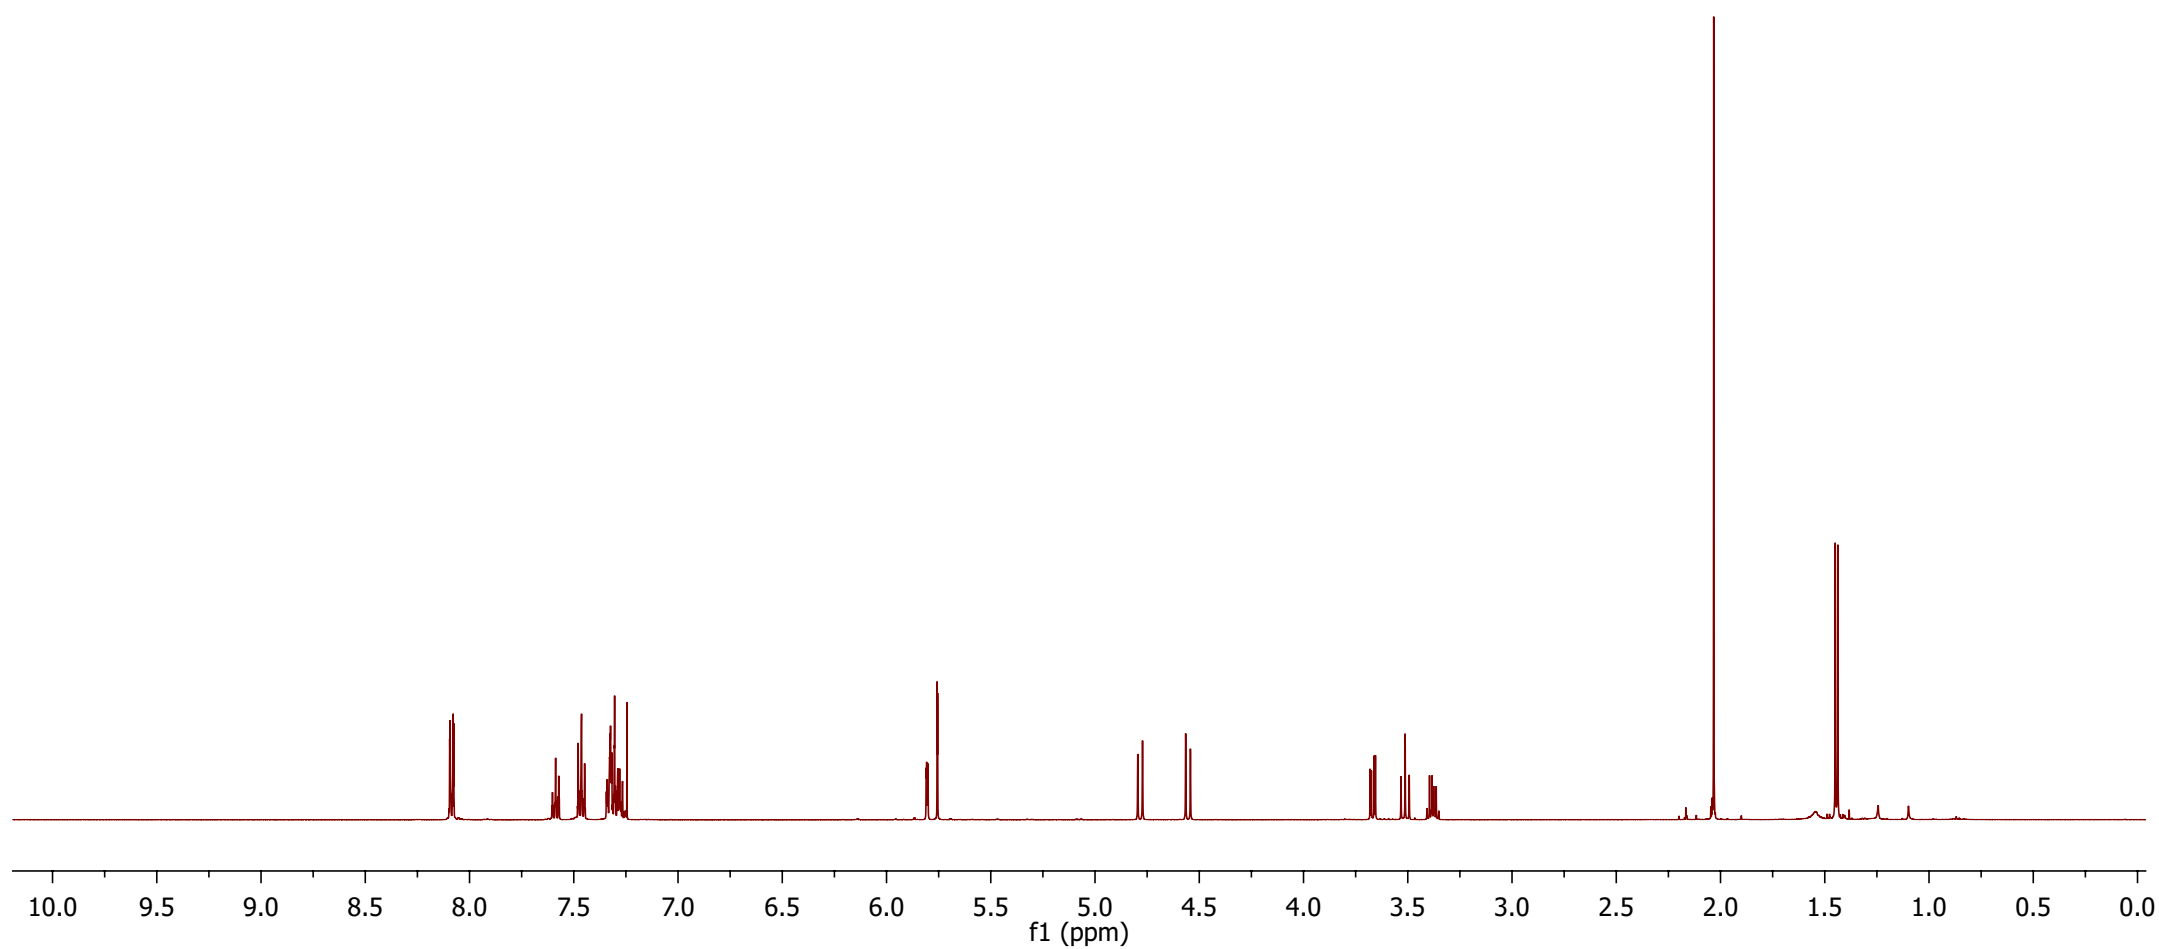

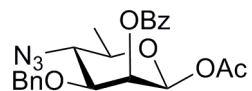**S18 (β)**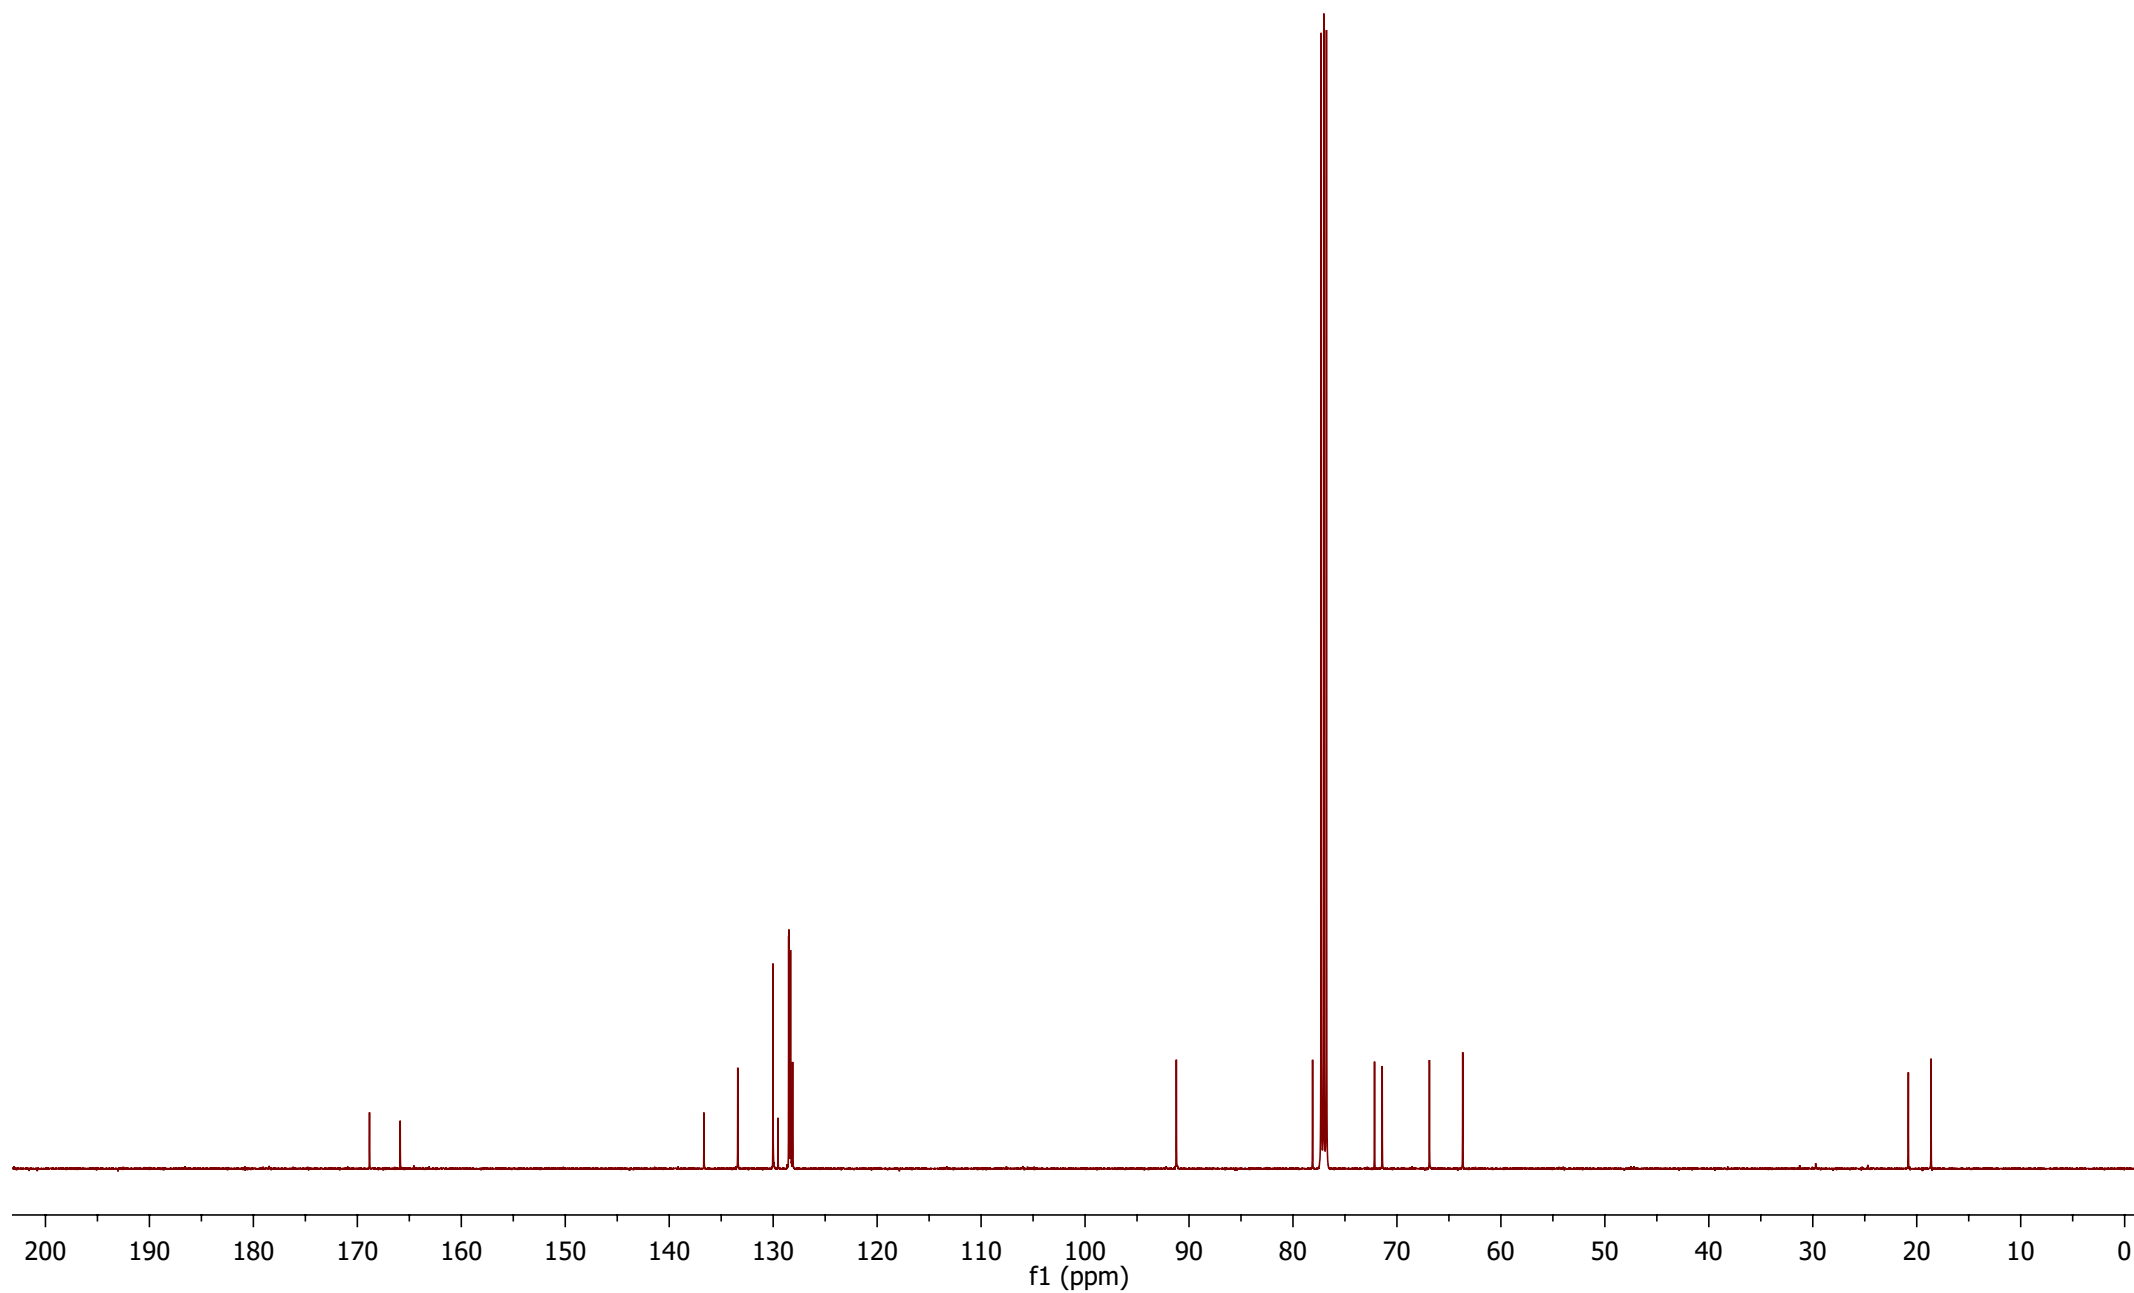



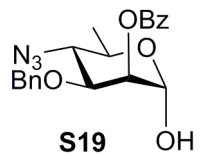

500 MHz, CDCl<sub>3</sub>

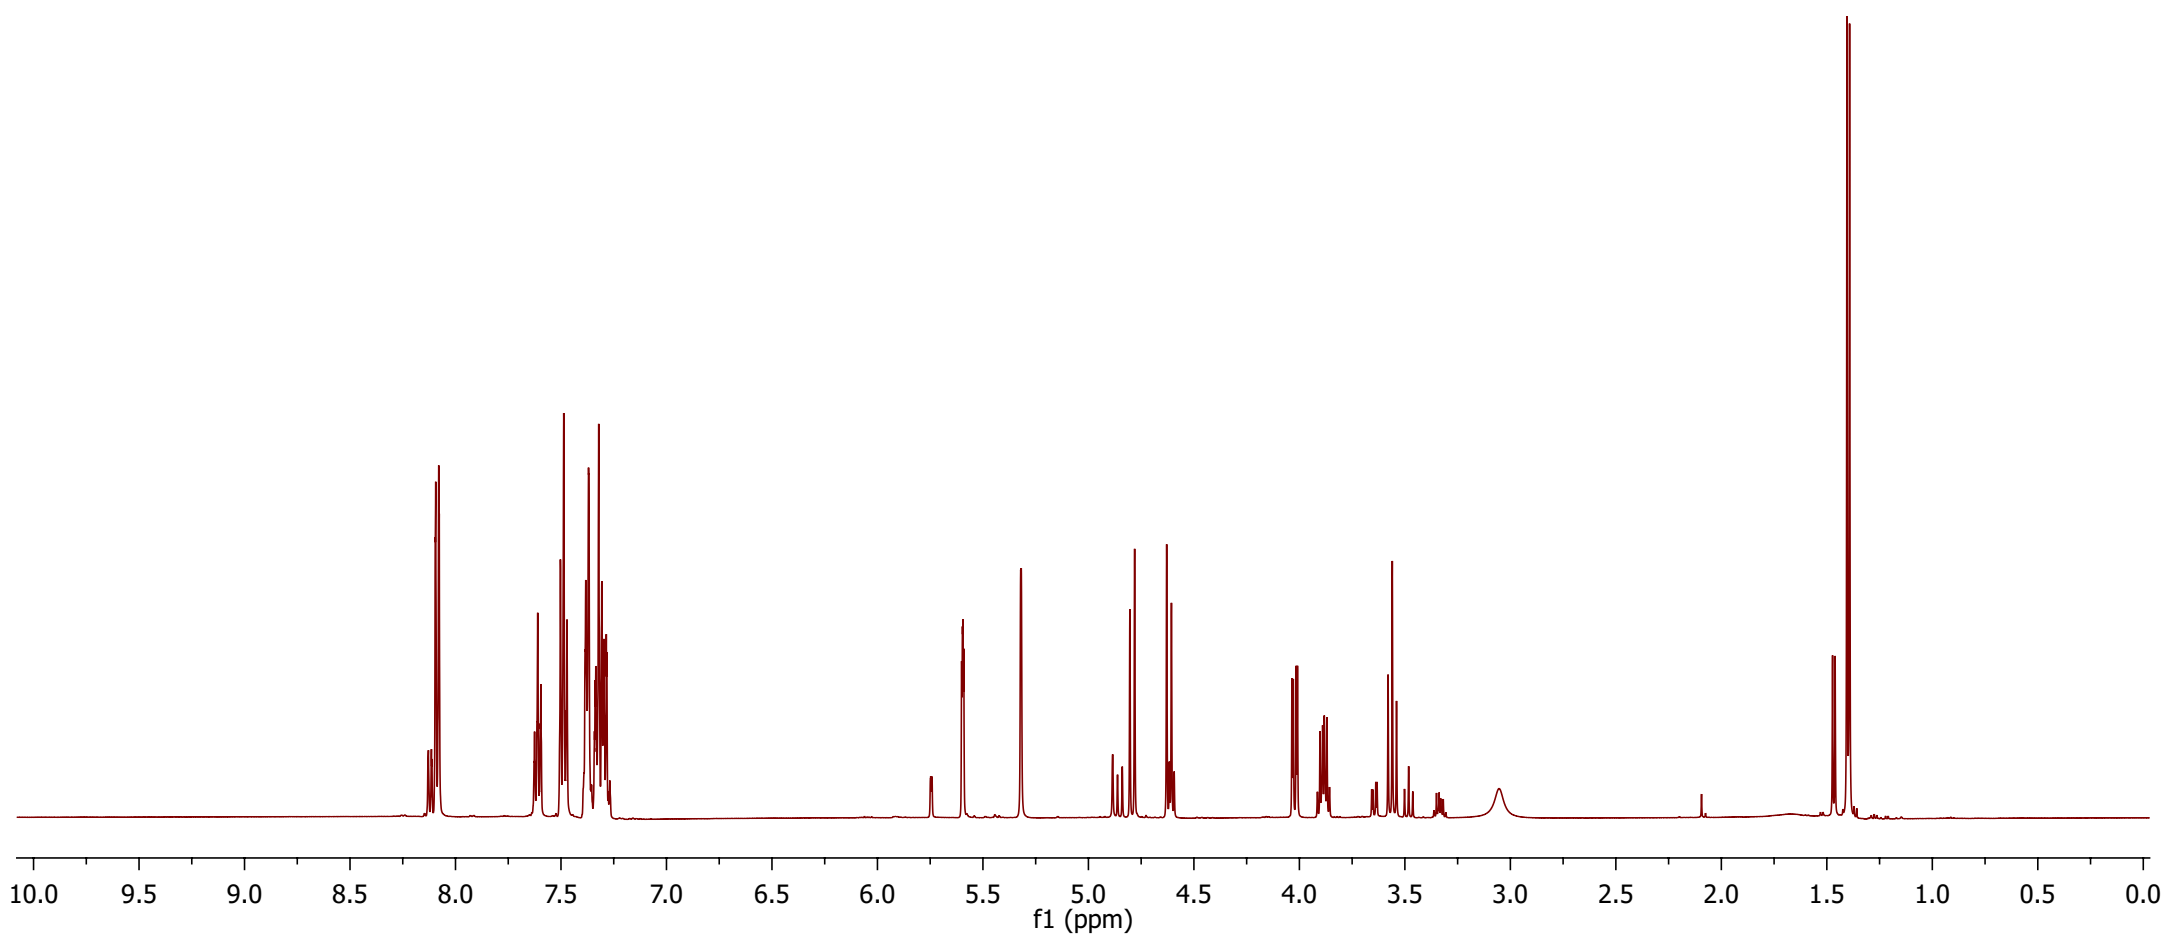

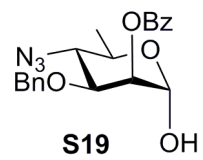

126 MHz, CDCl<sub>3</sub>

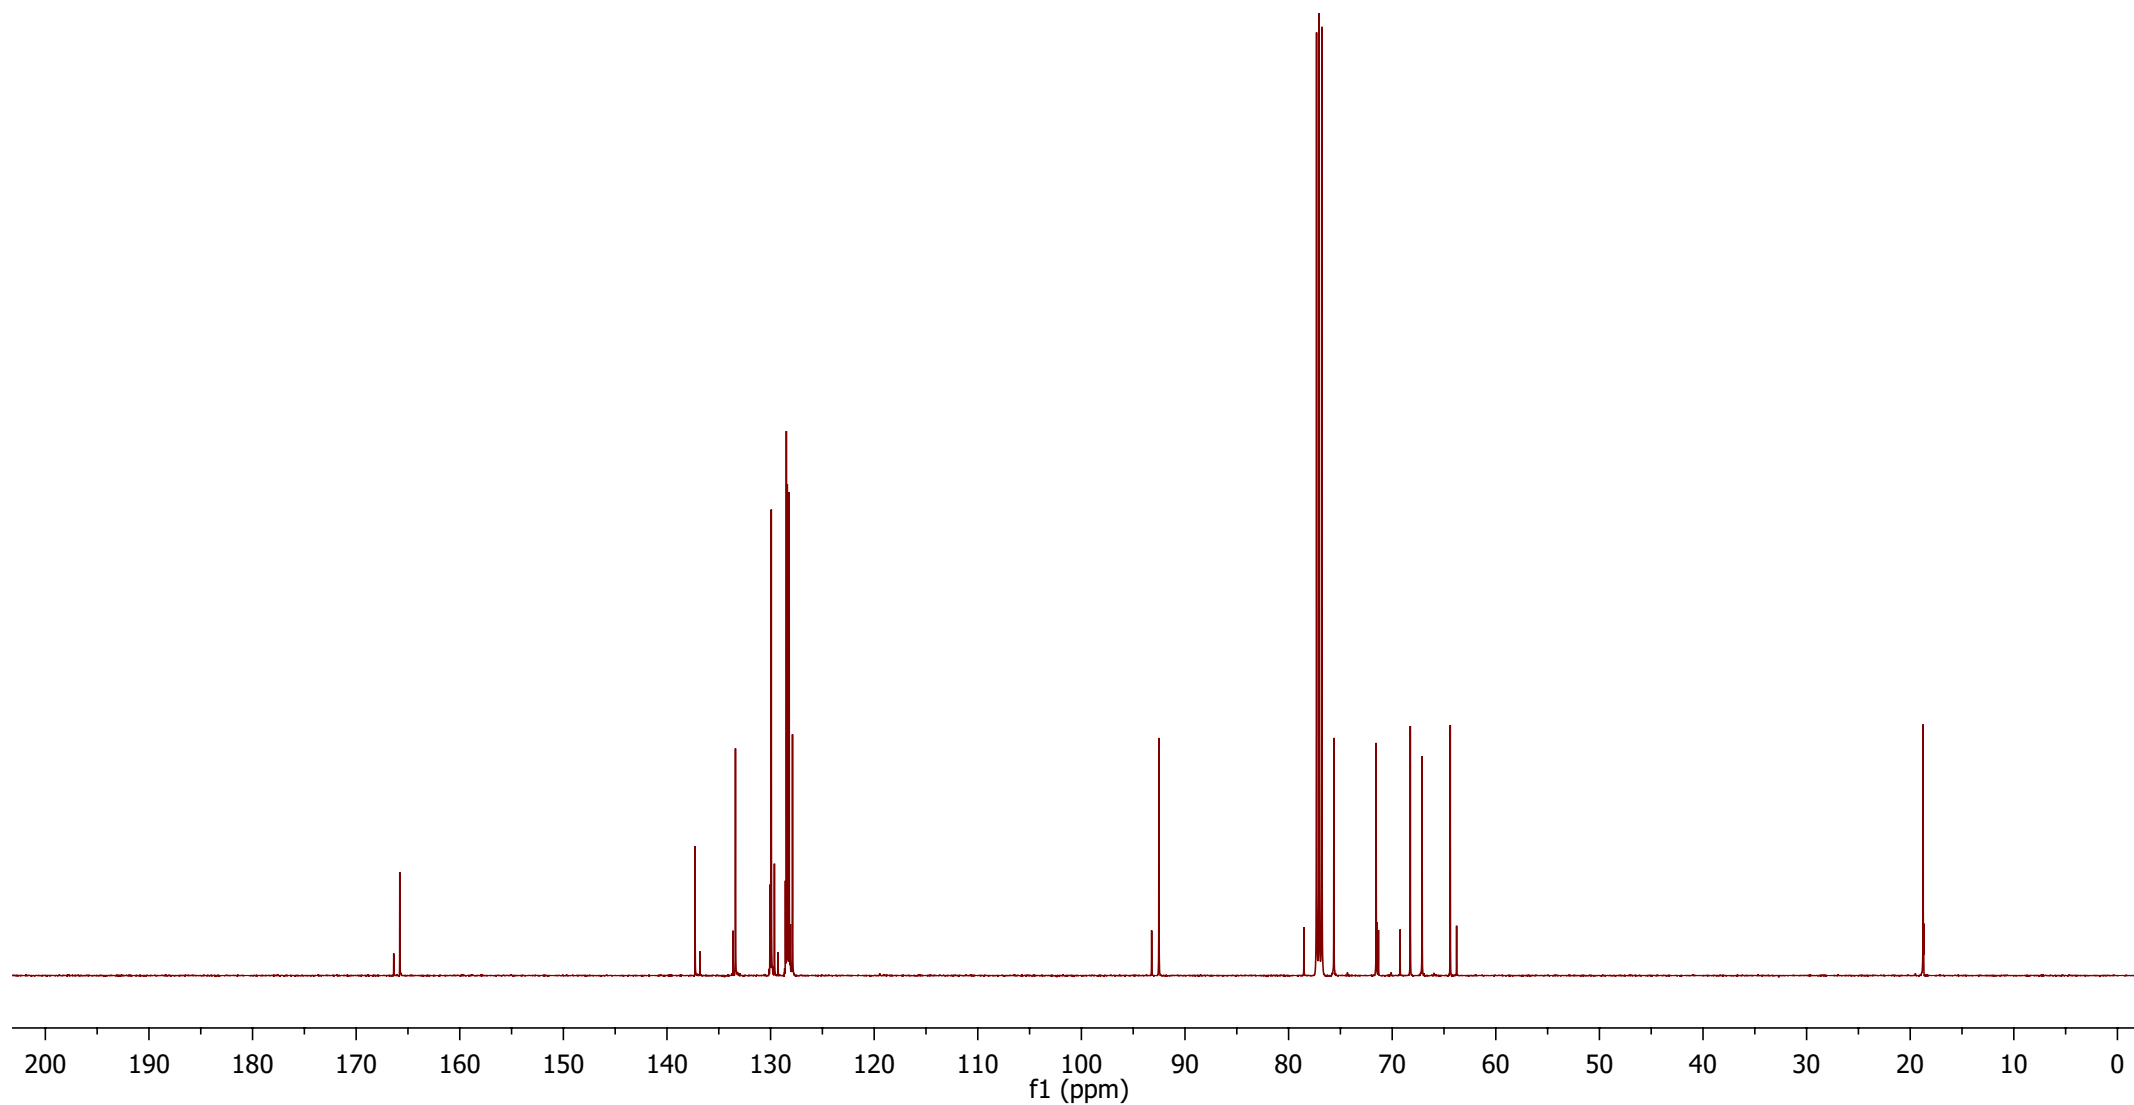

500 MHz, CDCl<sub>3</sub>

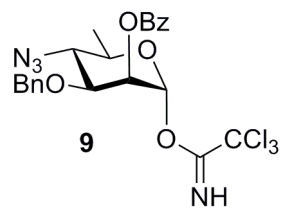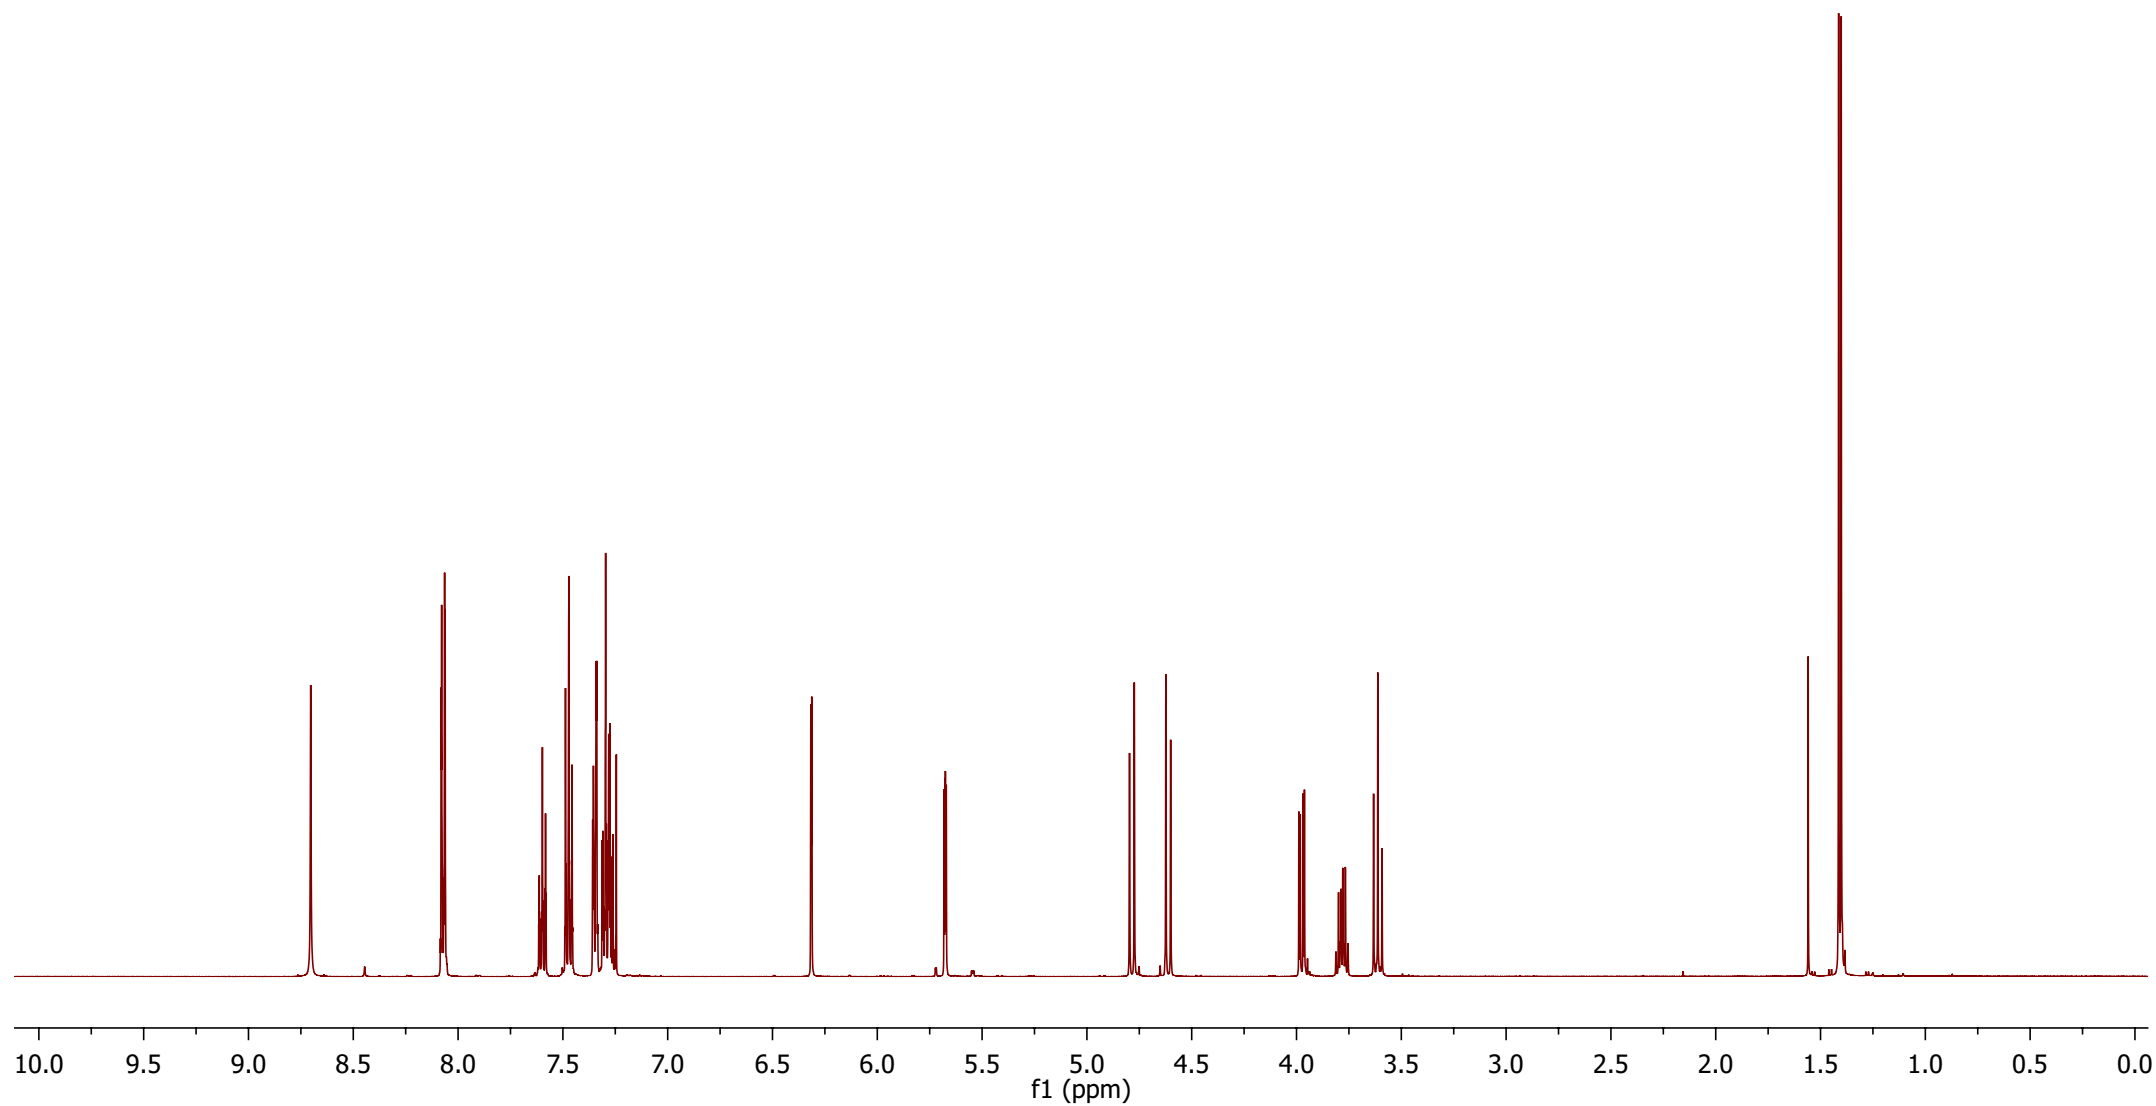

126 MHz, CDCl<sub>3</sub>

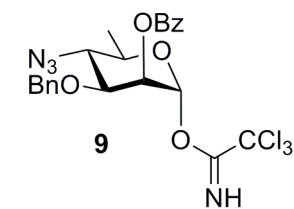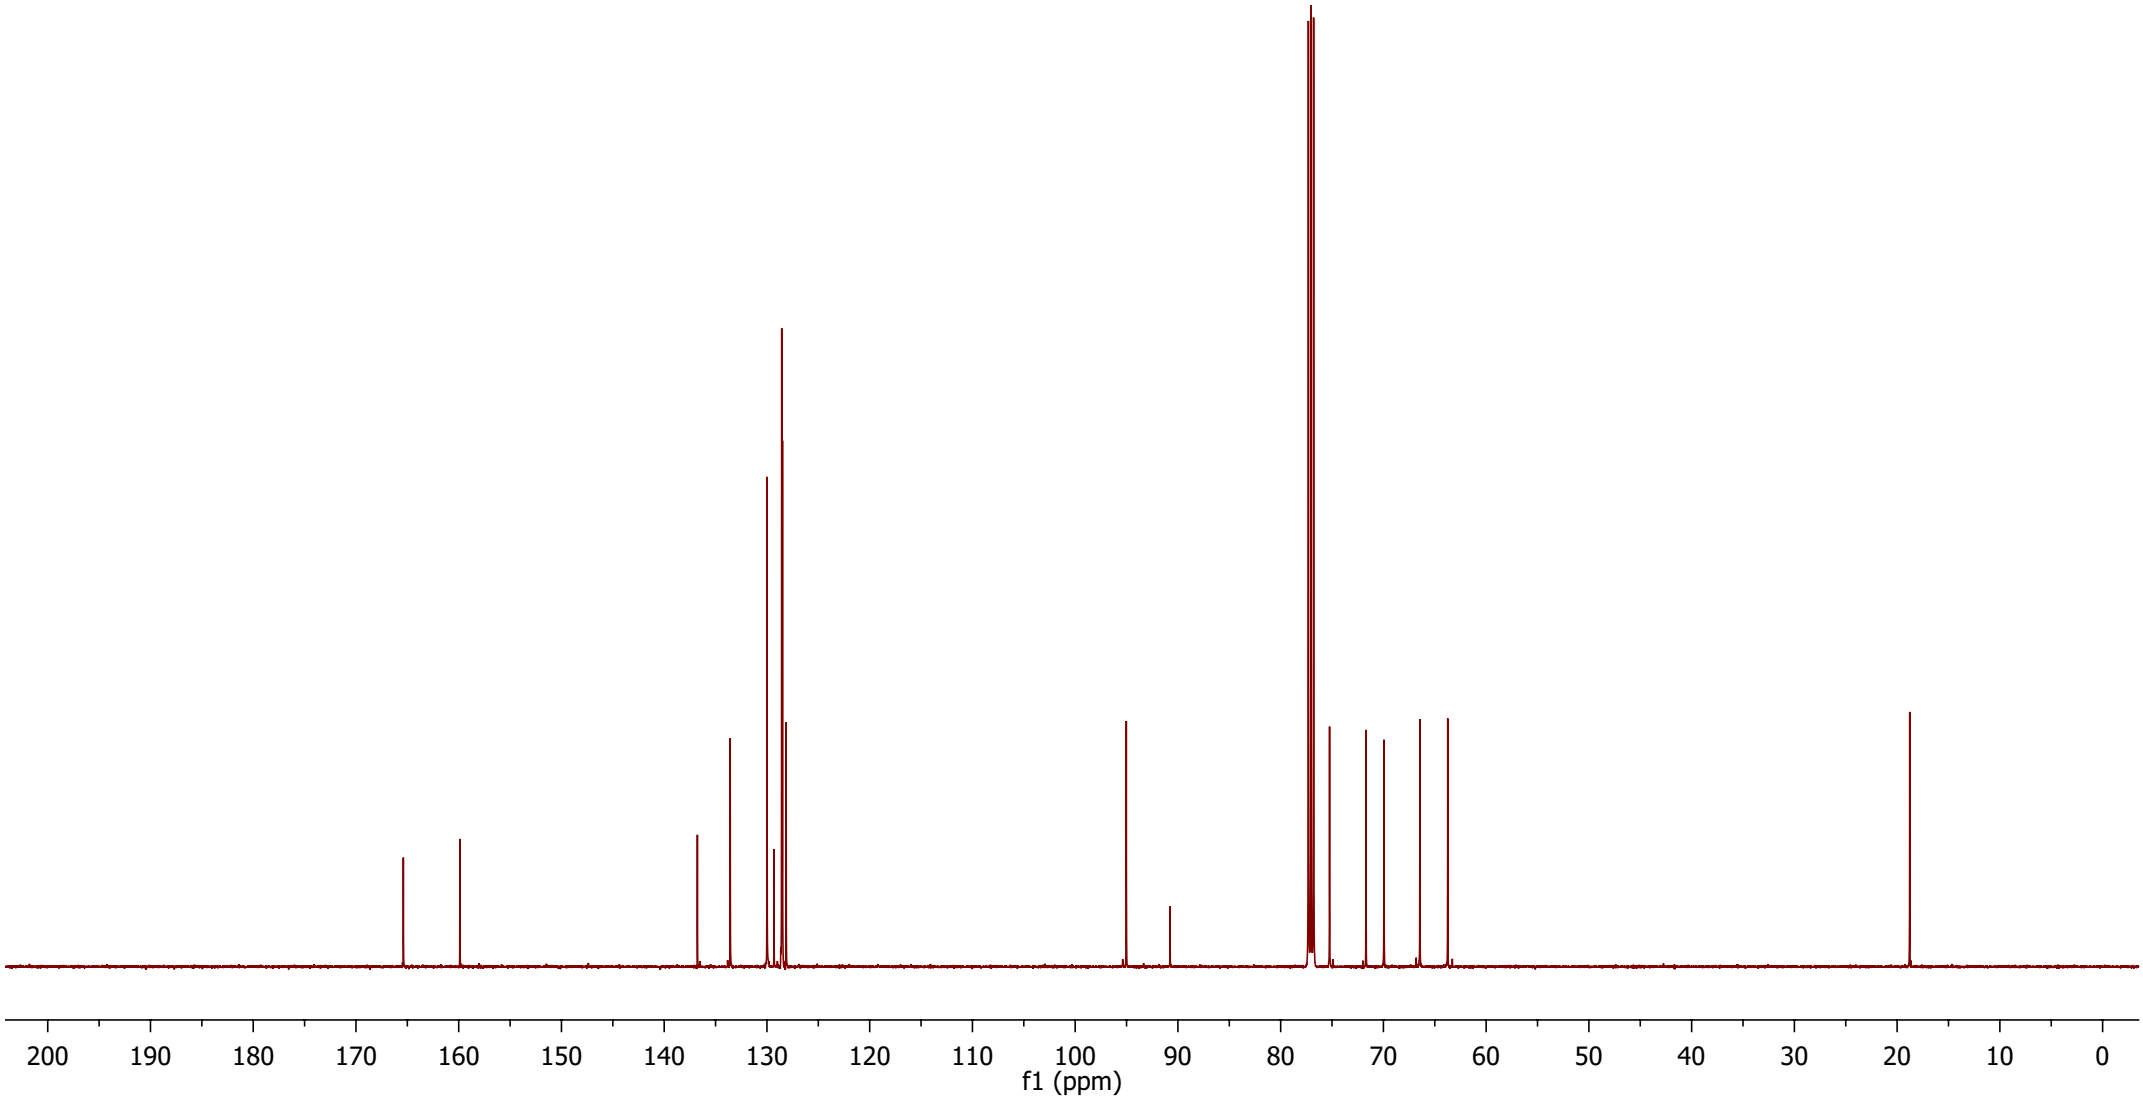

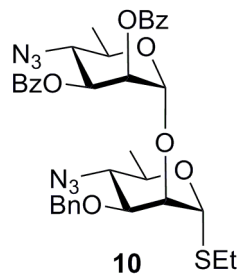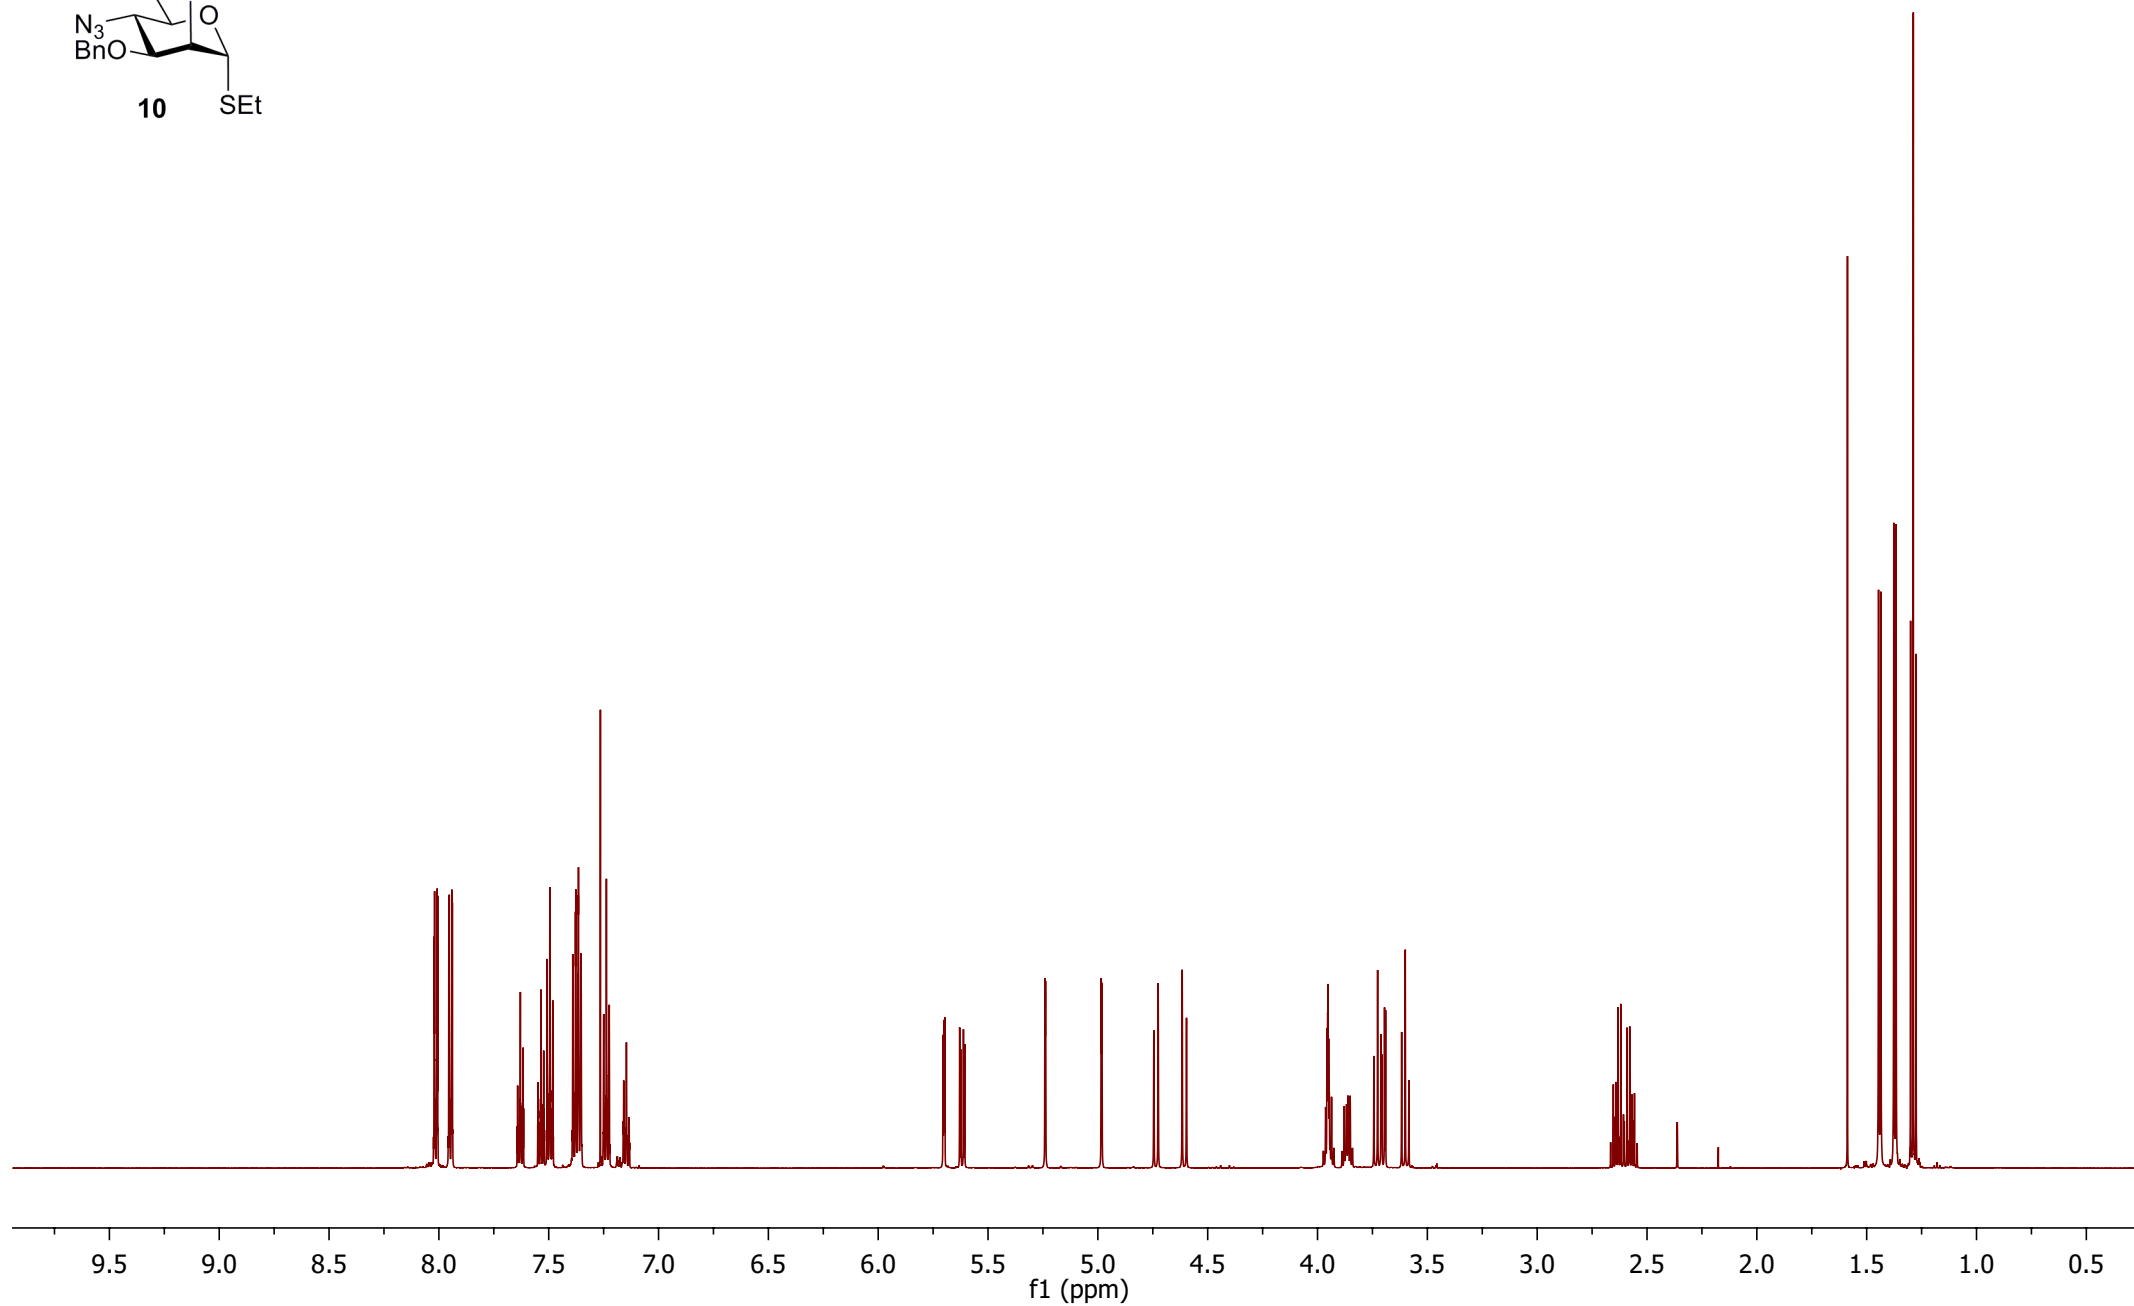

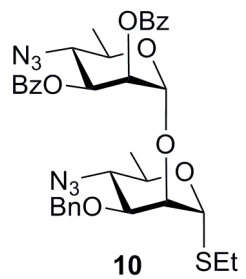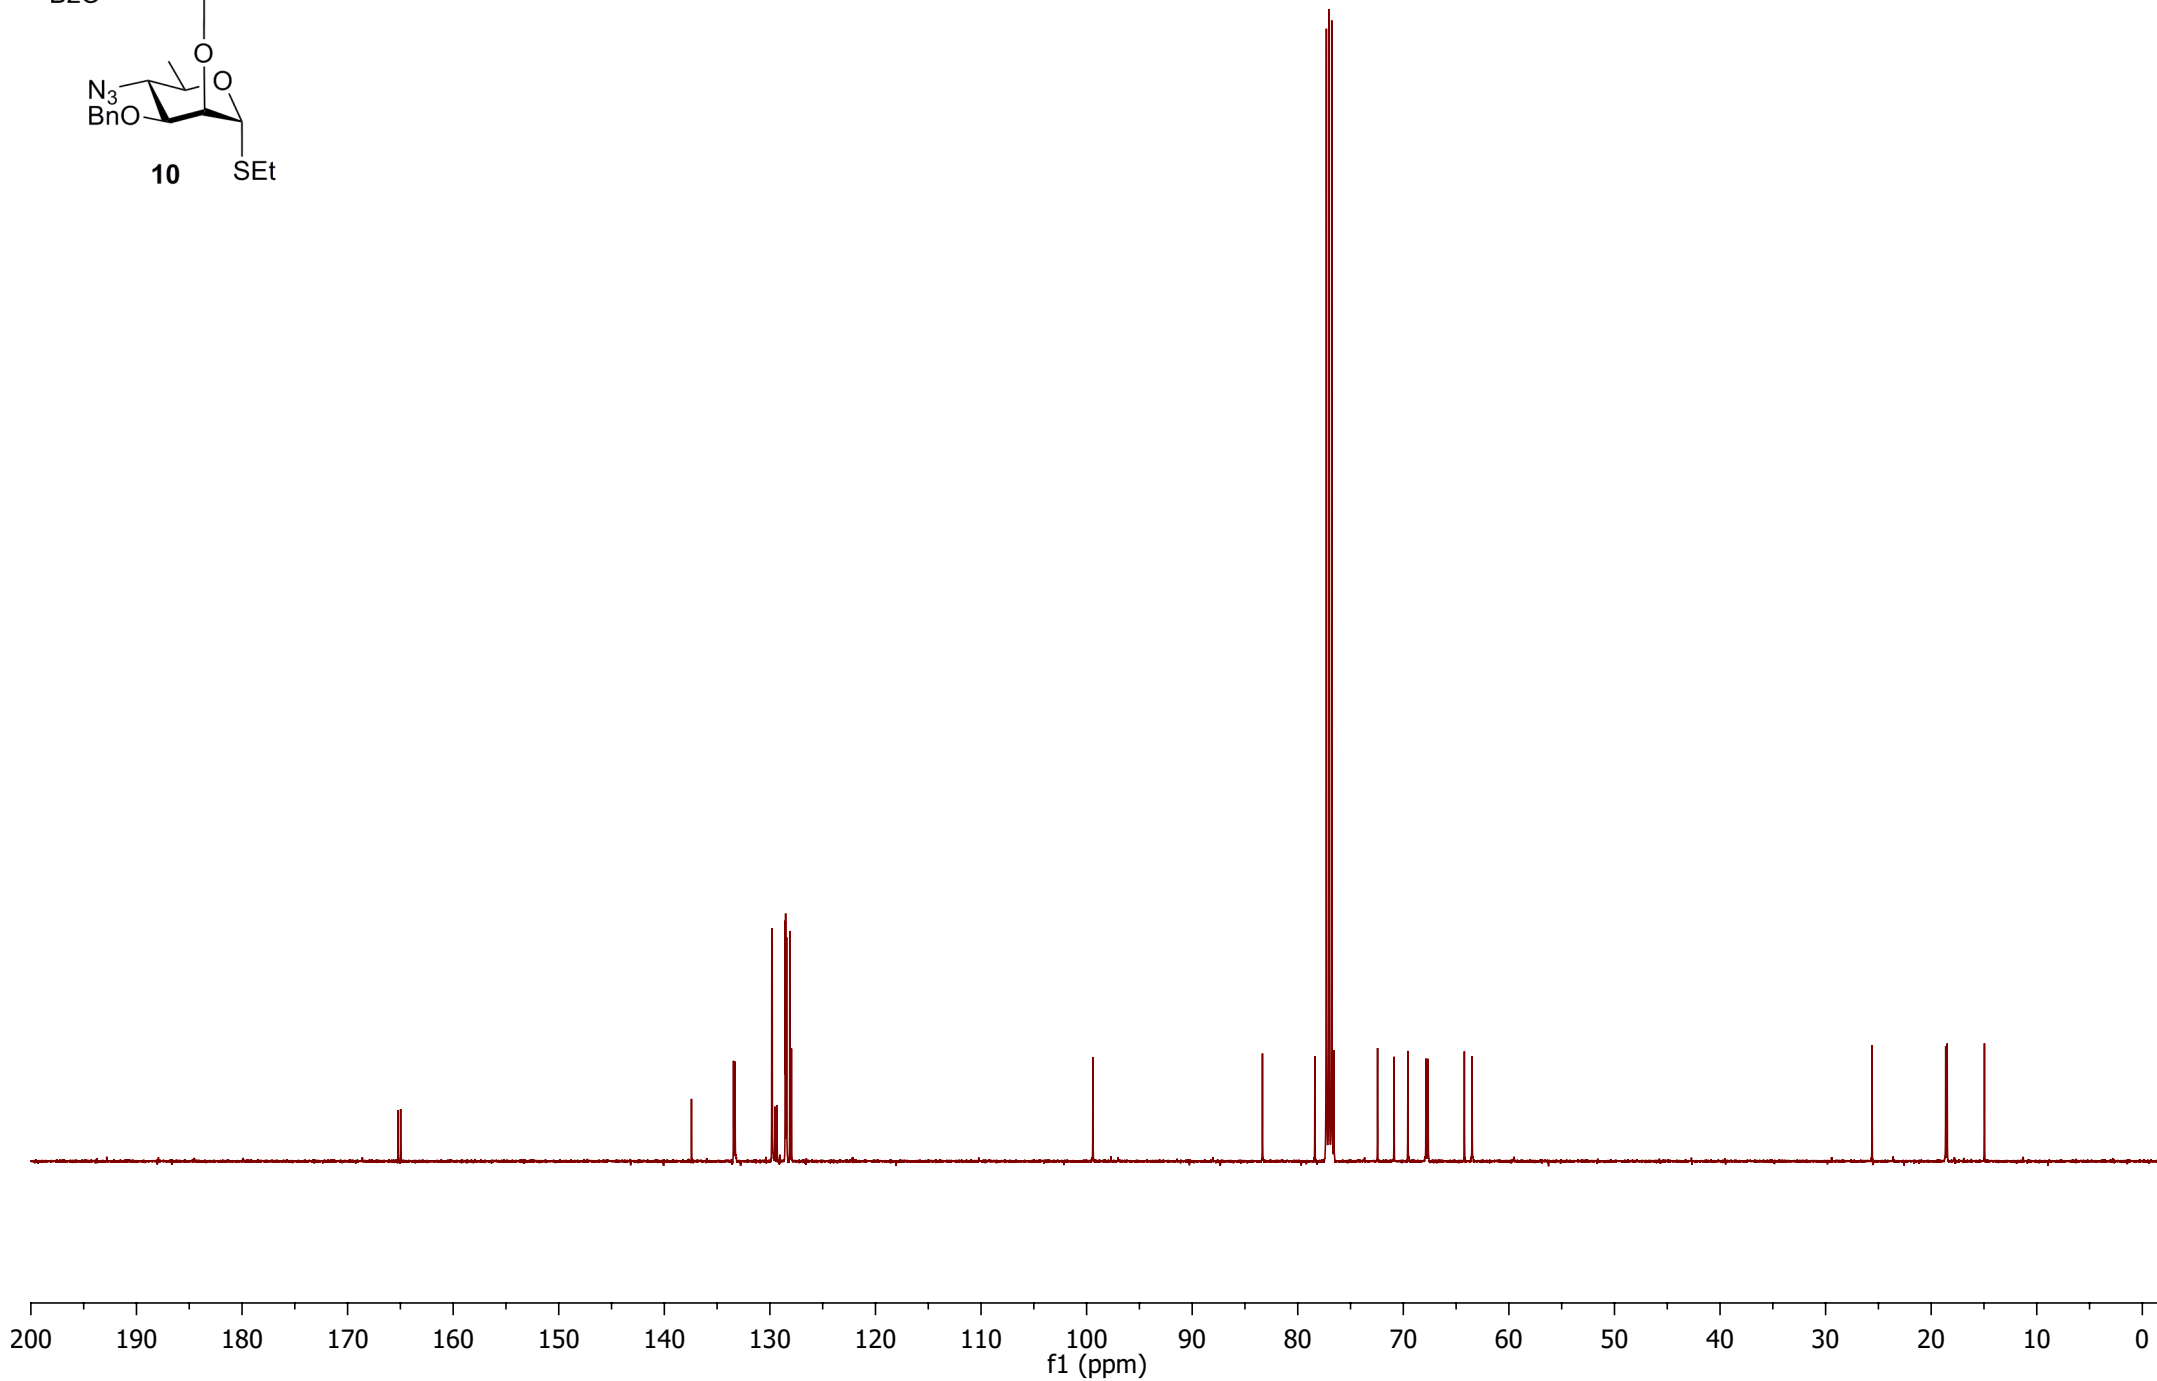

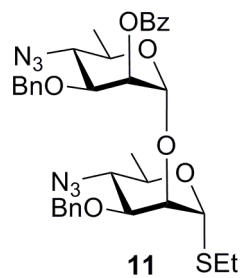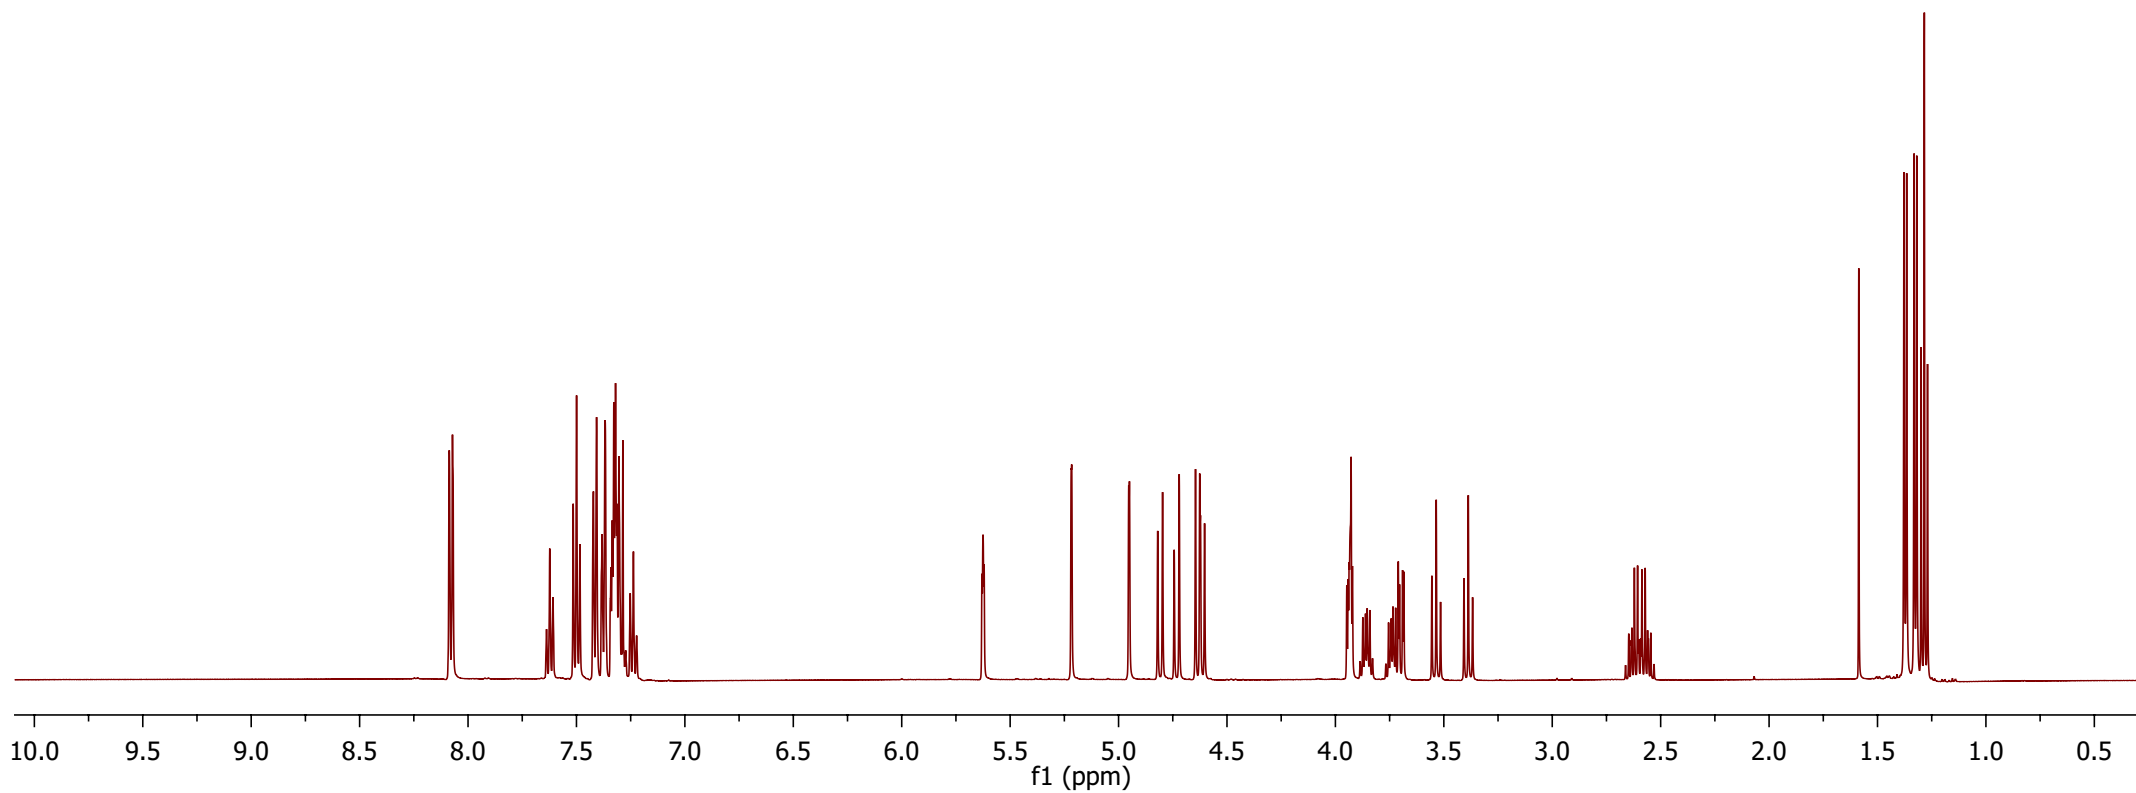

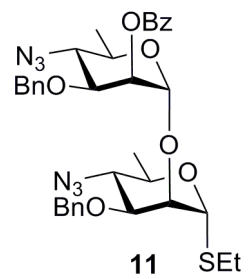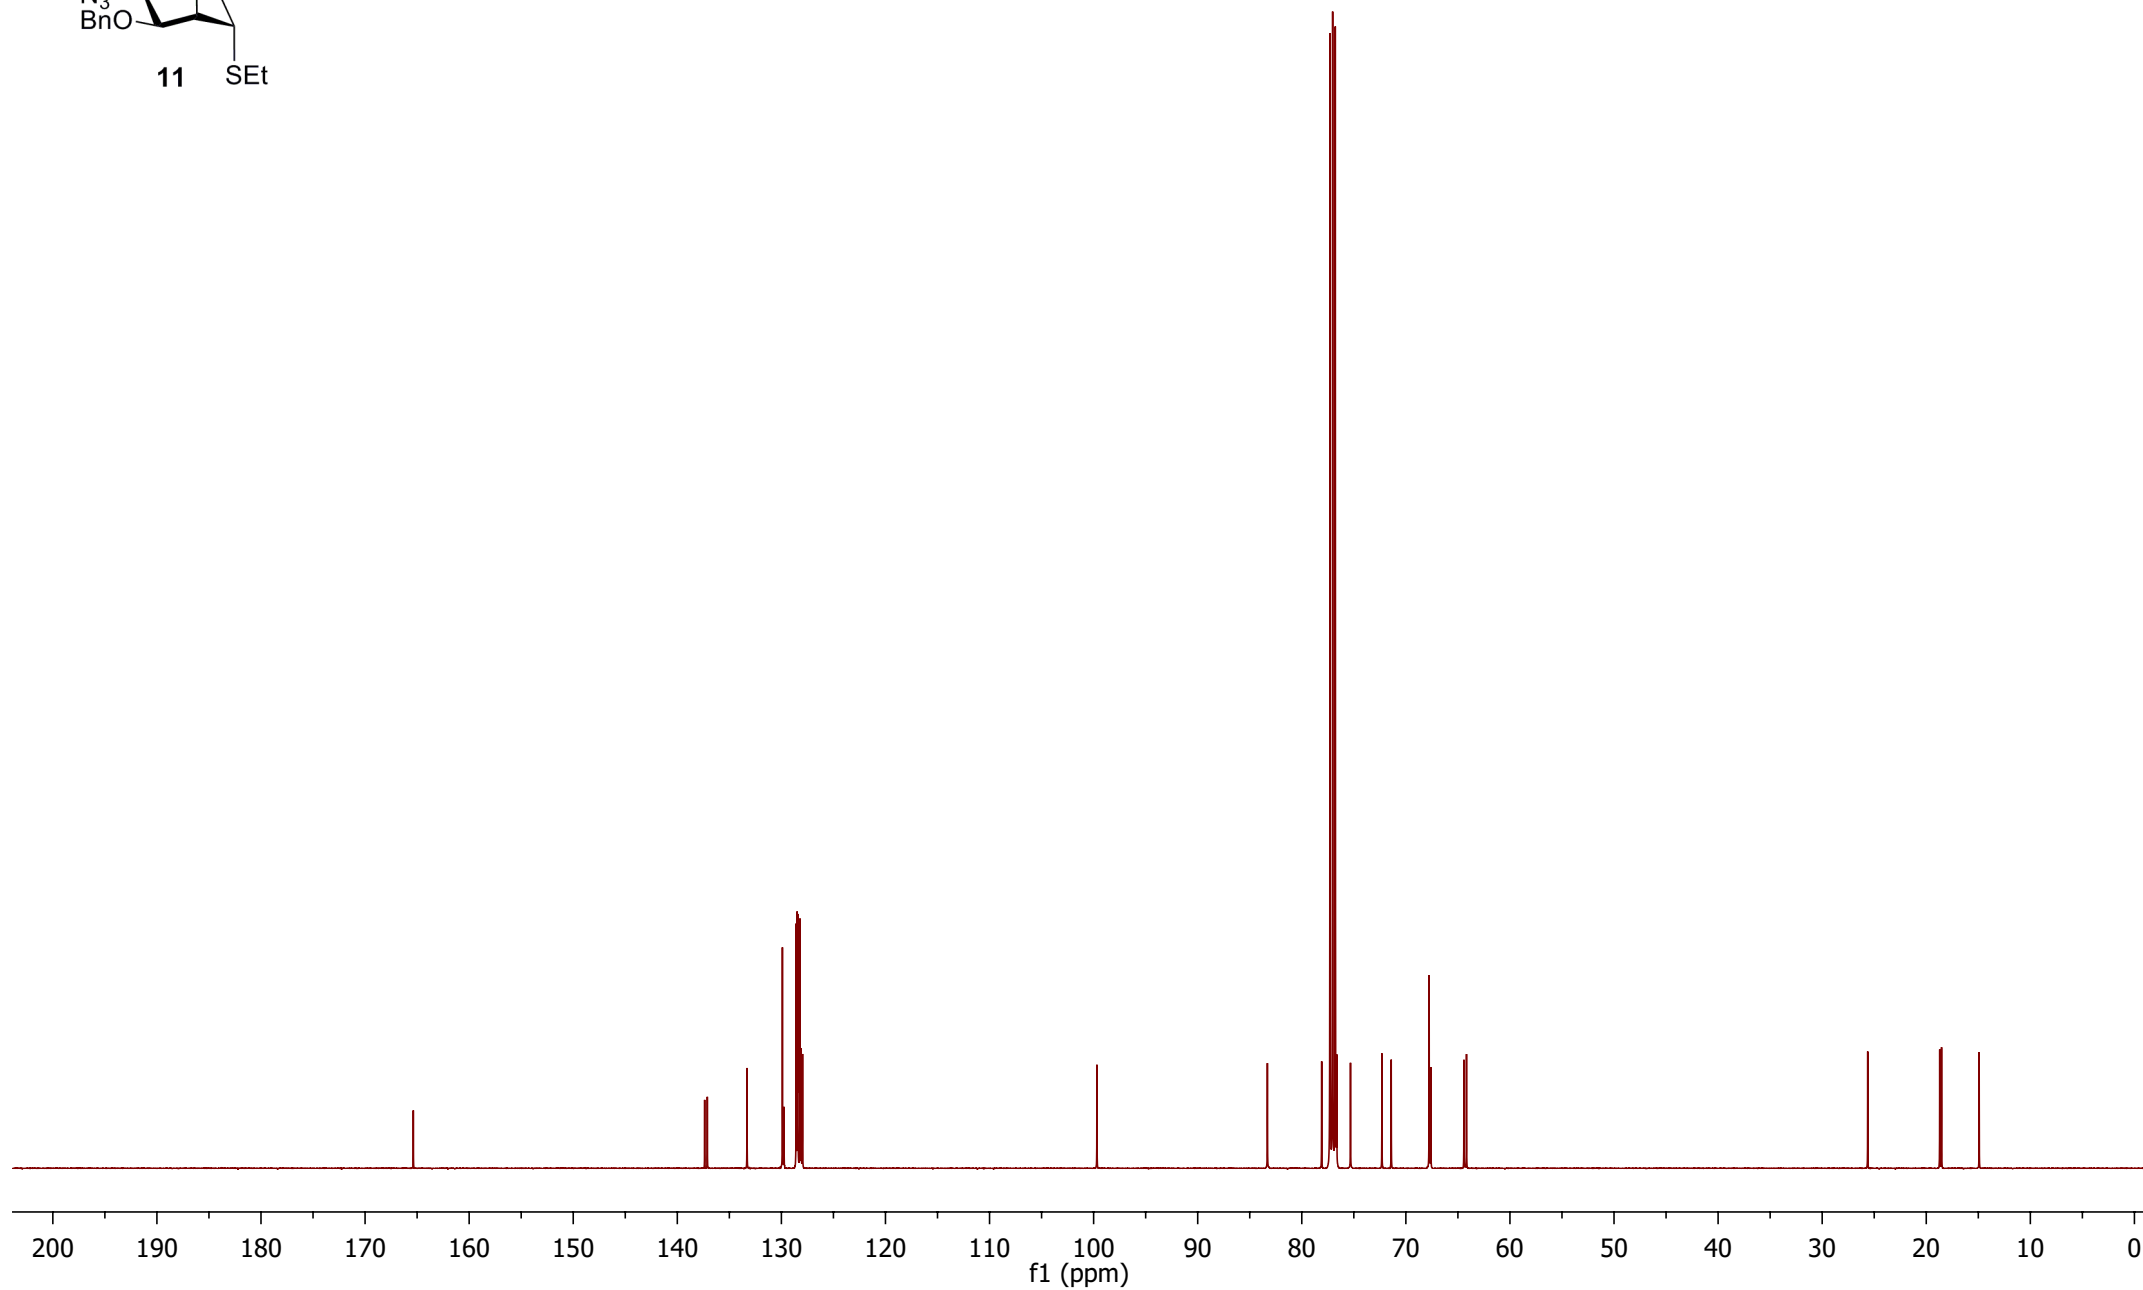



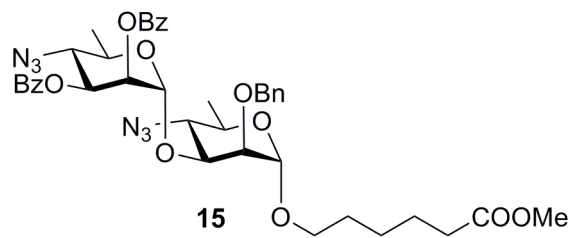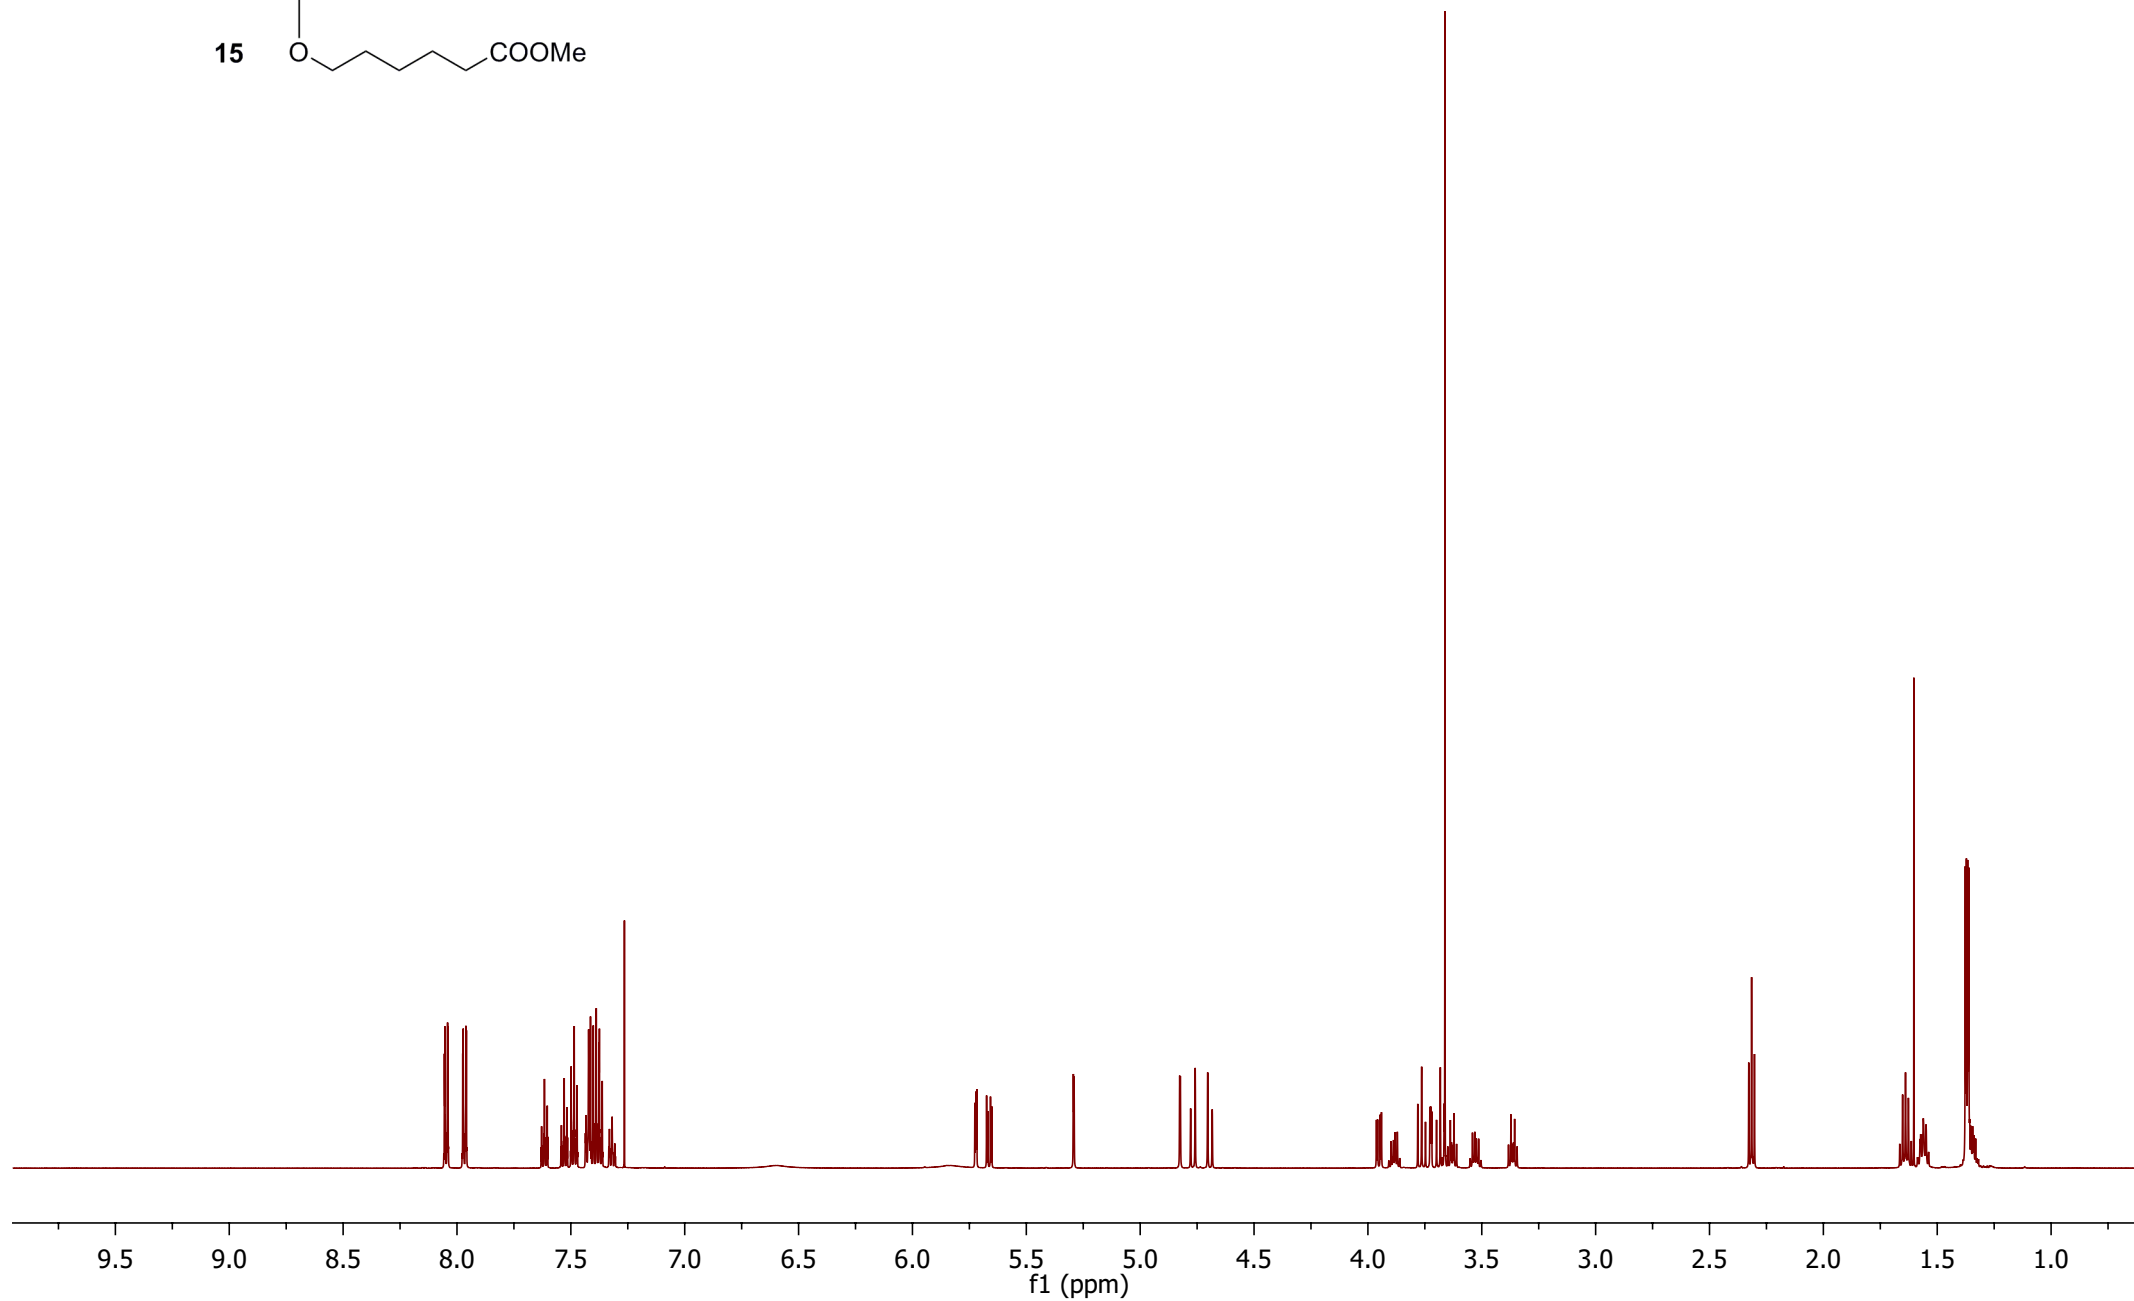

126 MHz, CDCl<sub>3</sub>

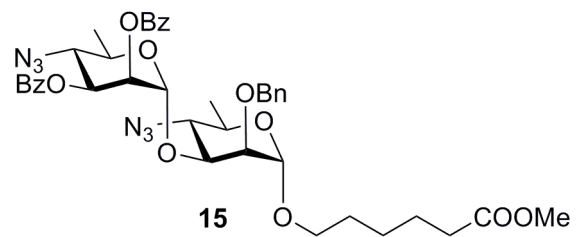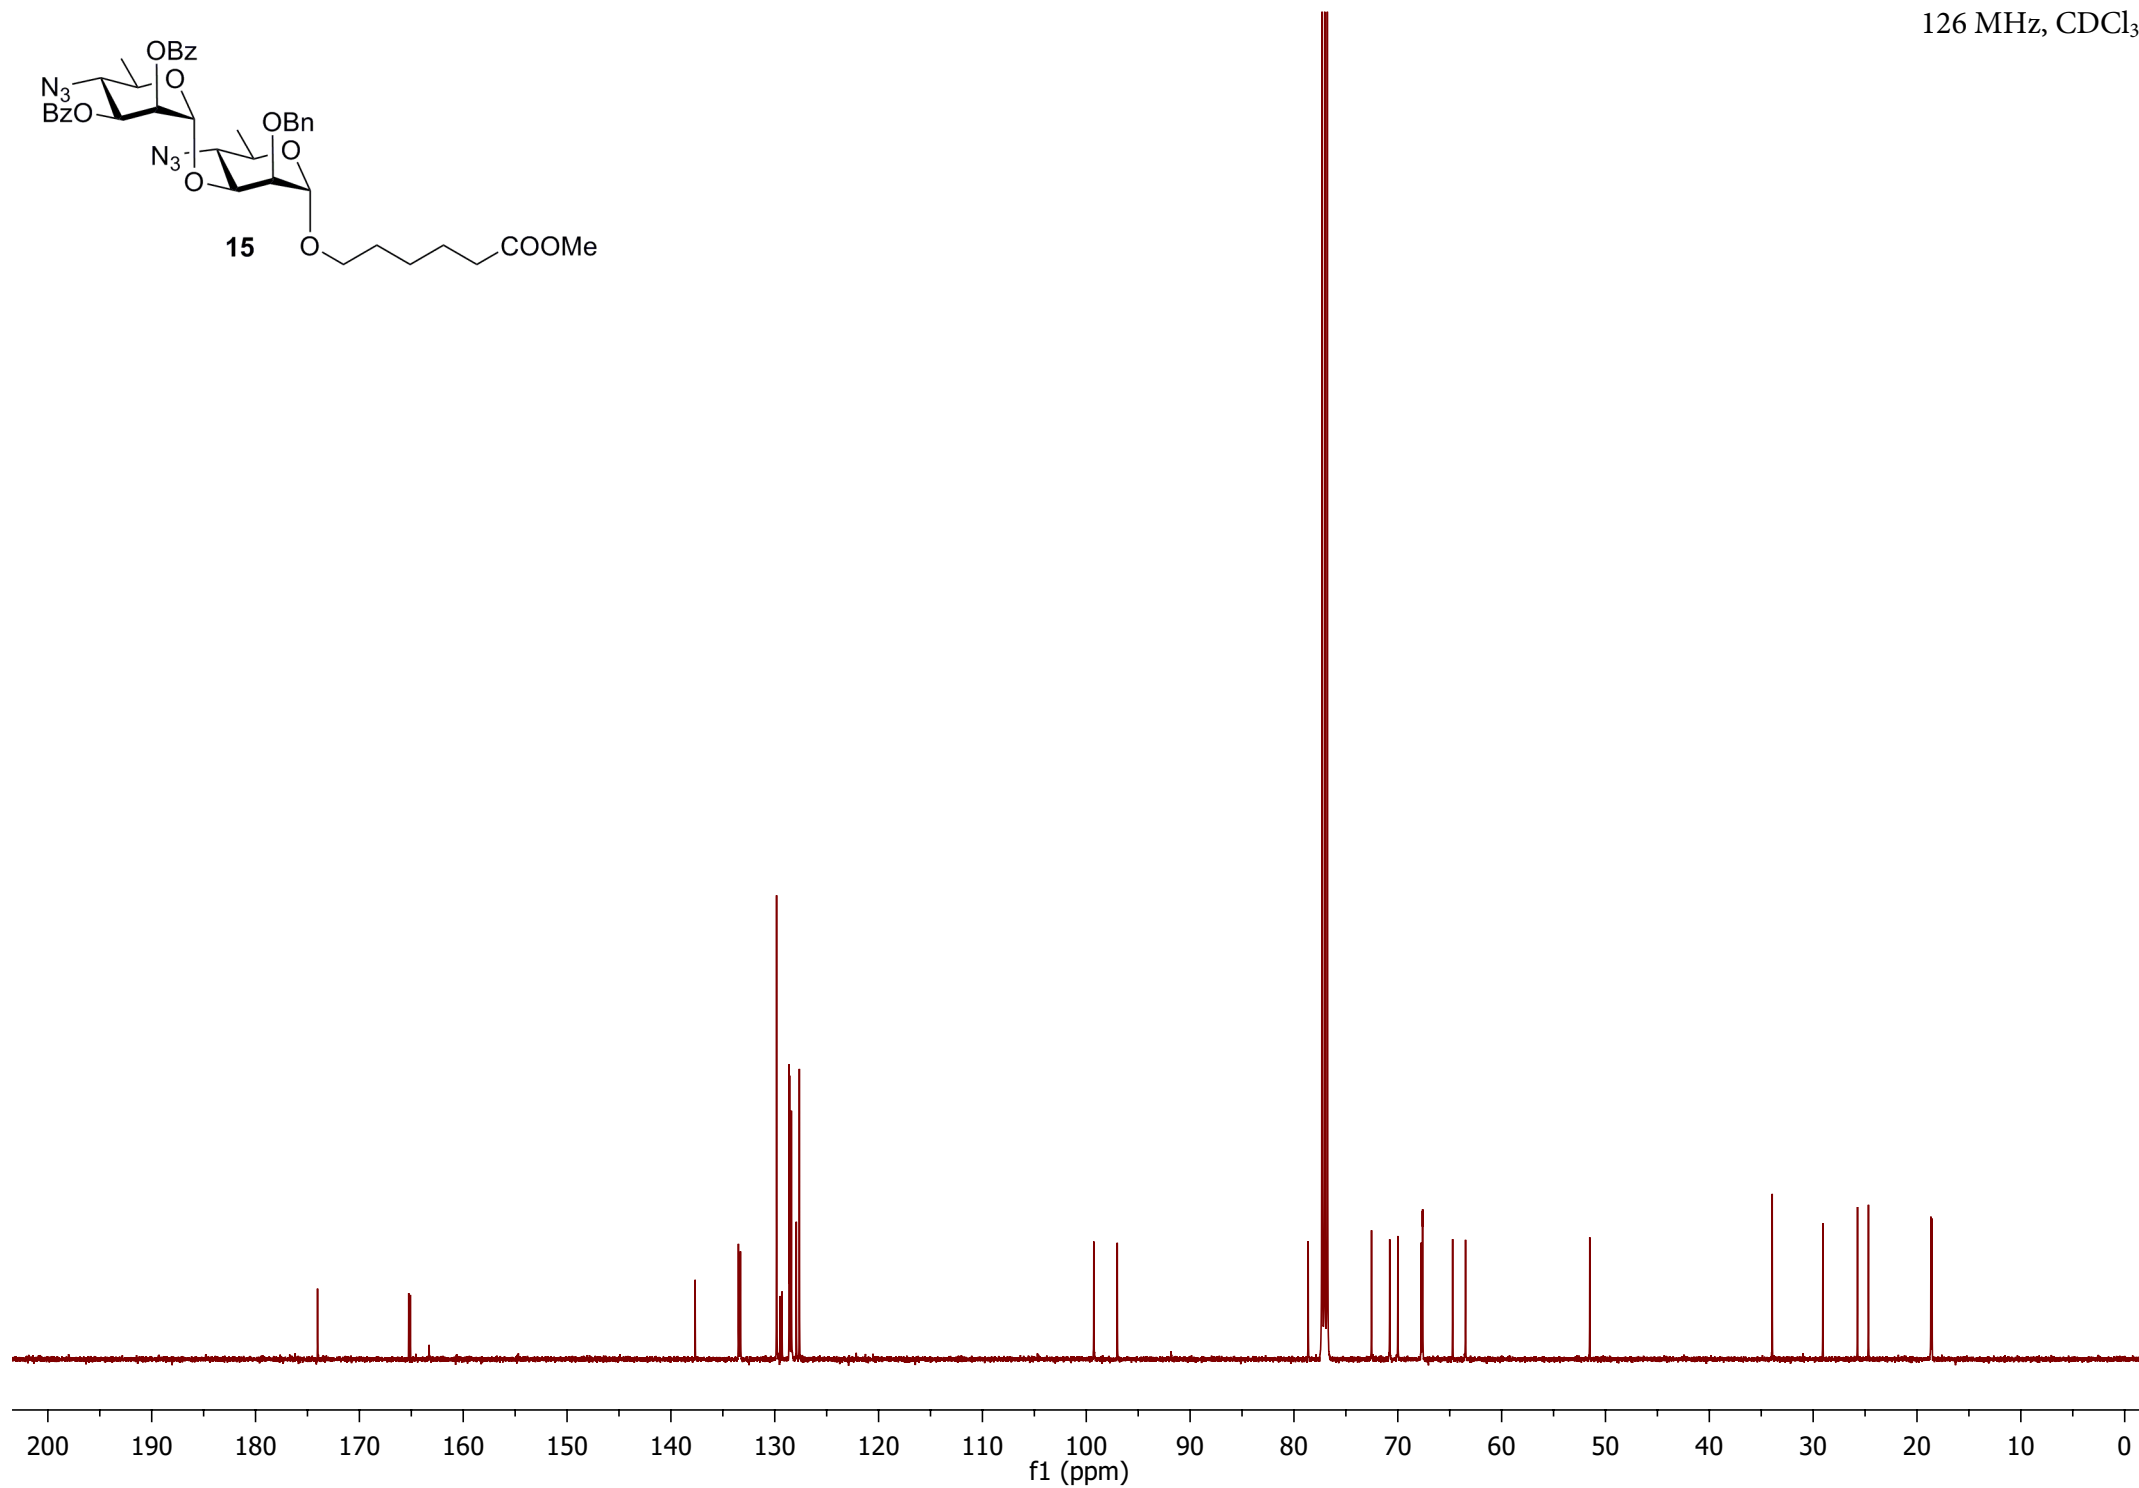

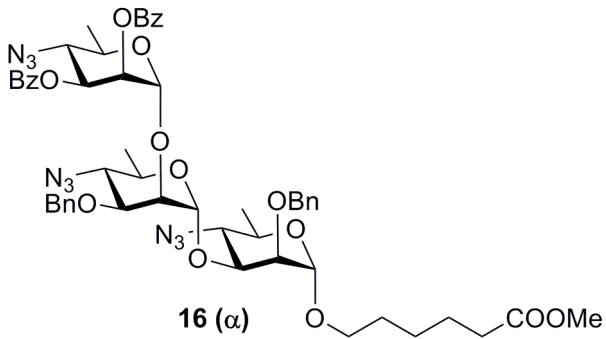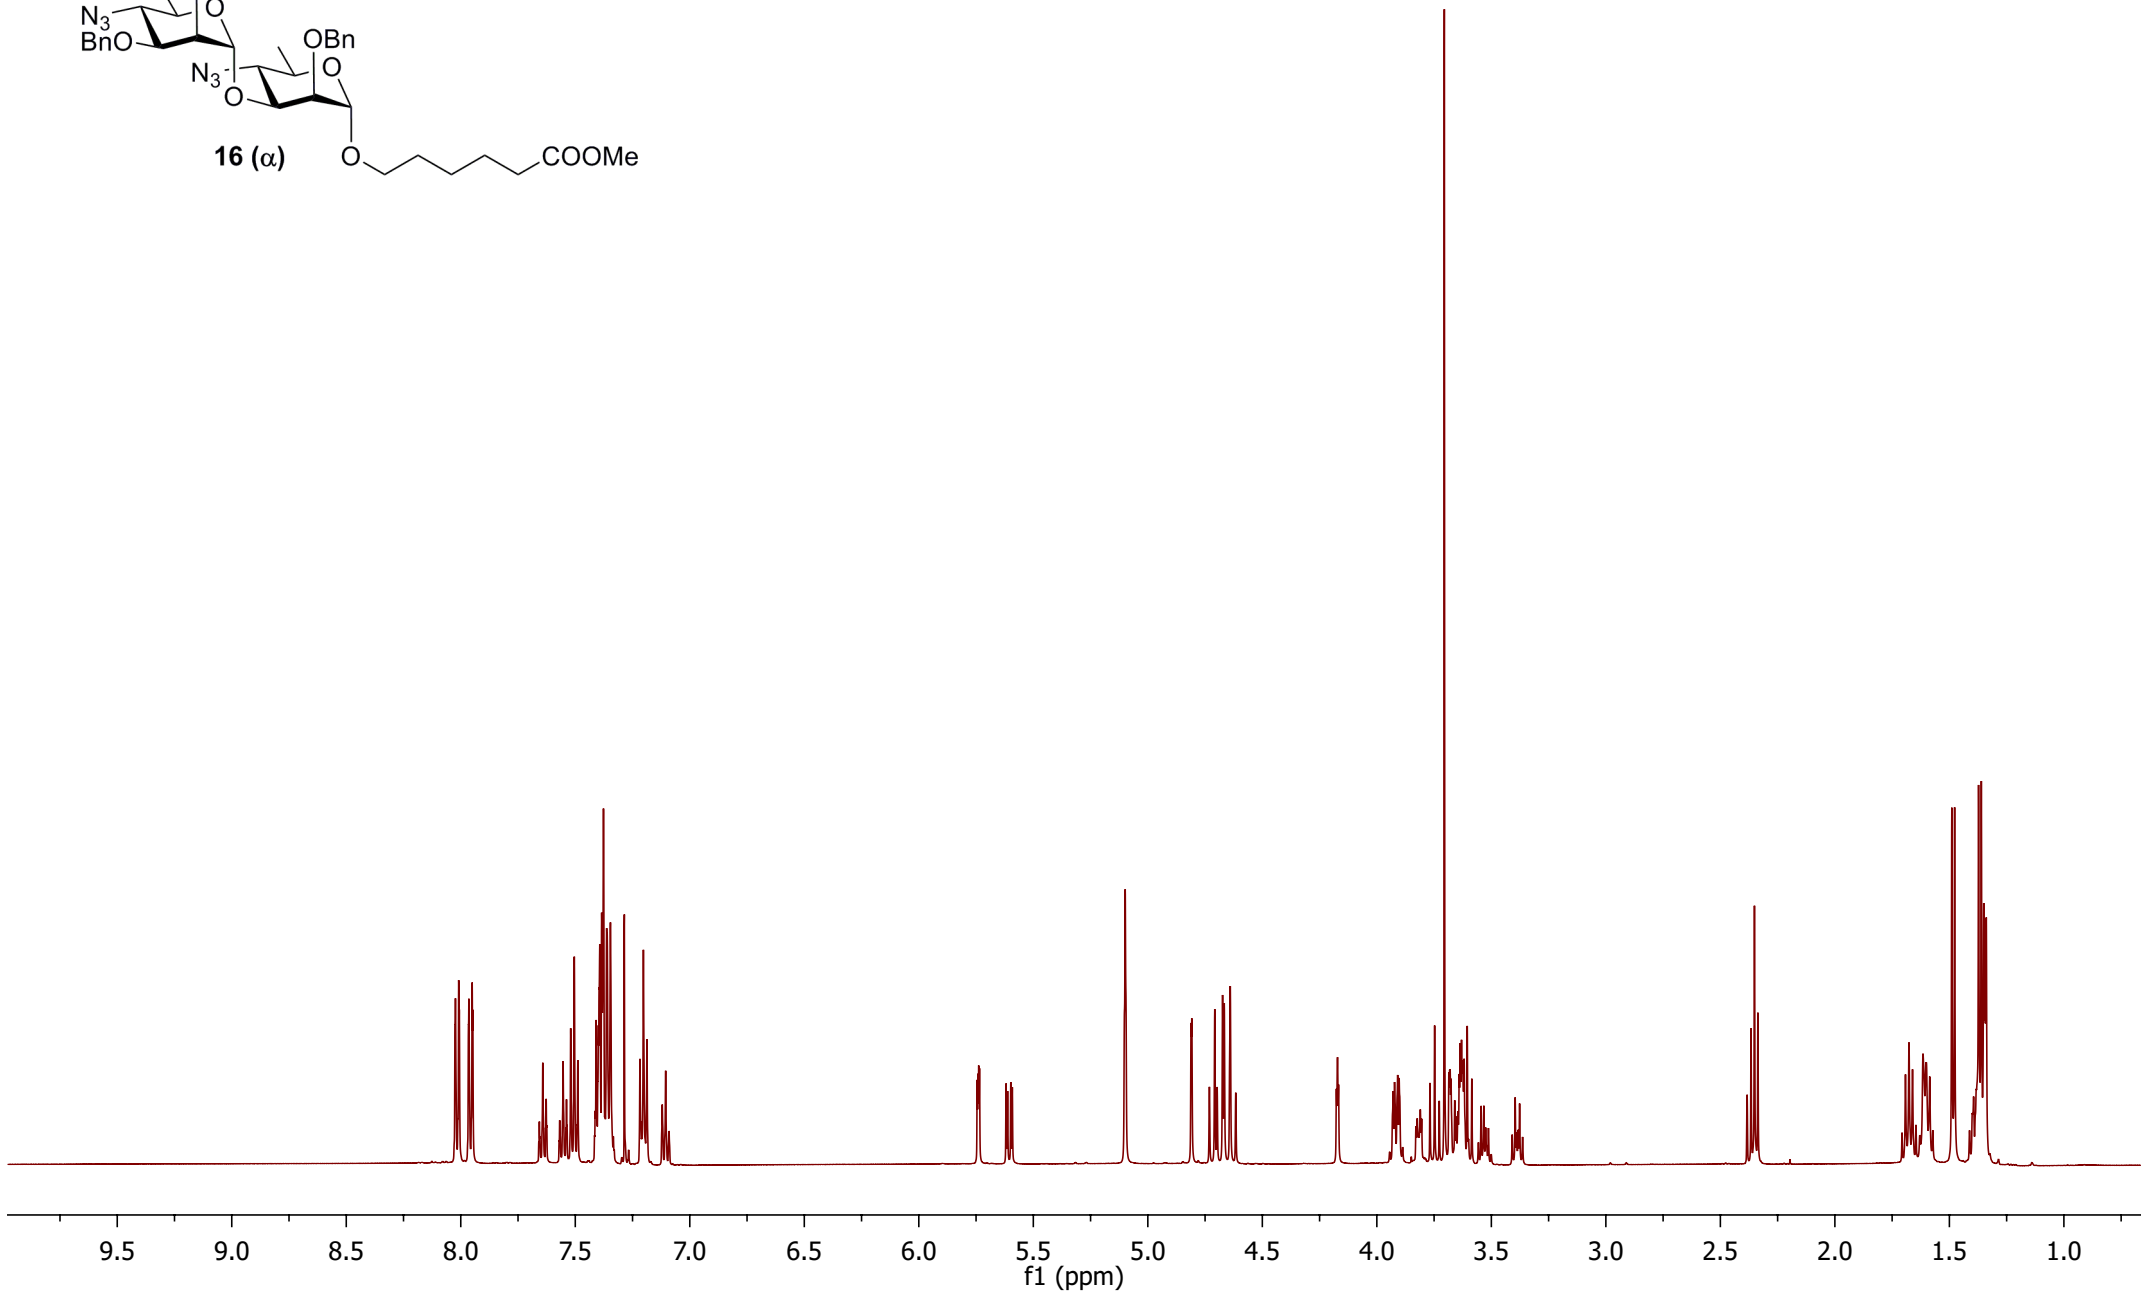

126 MHz, CDCl<sub>3</sub>

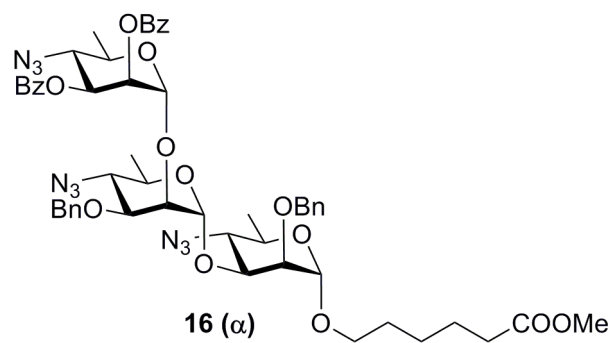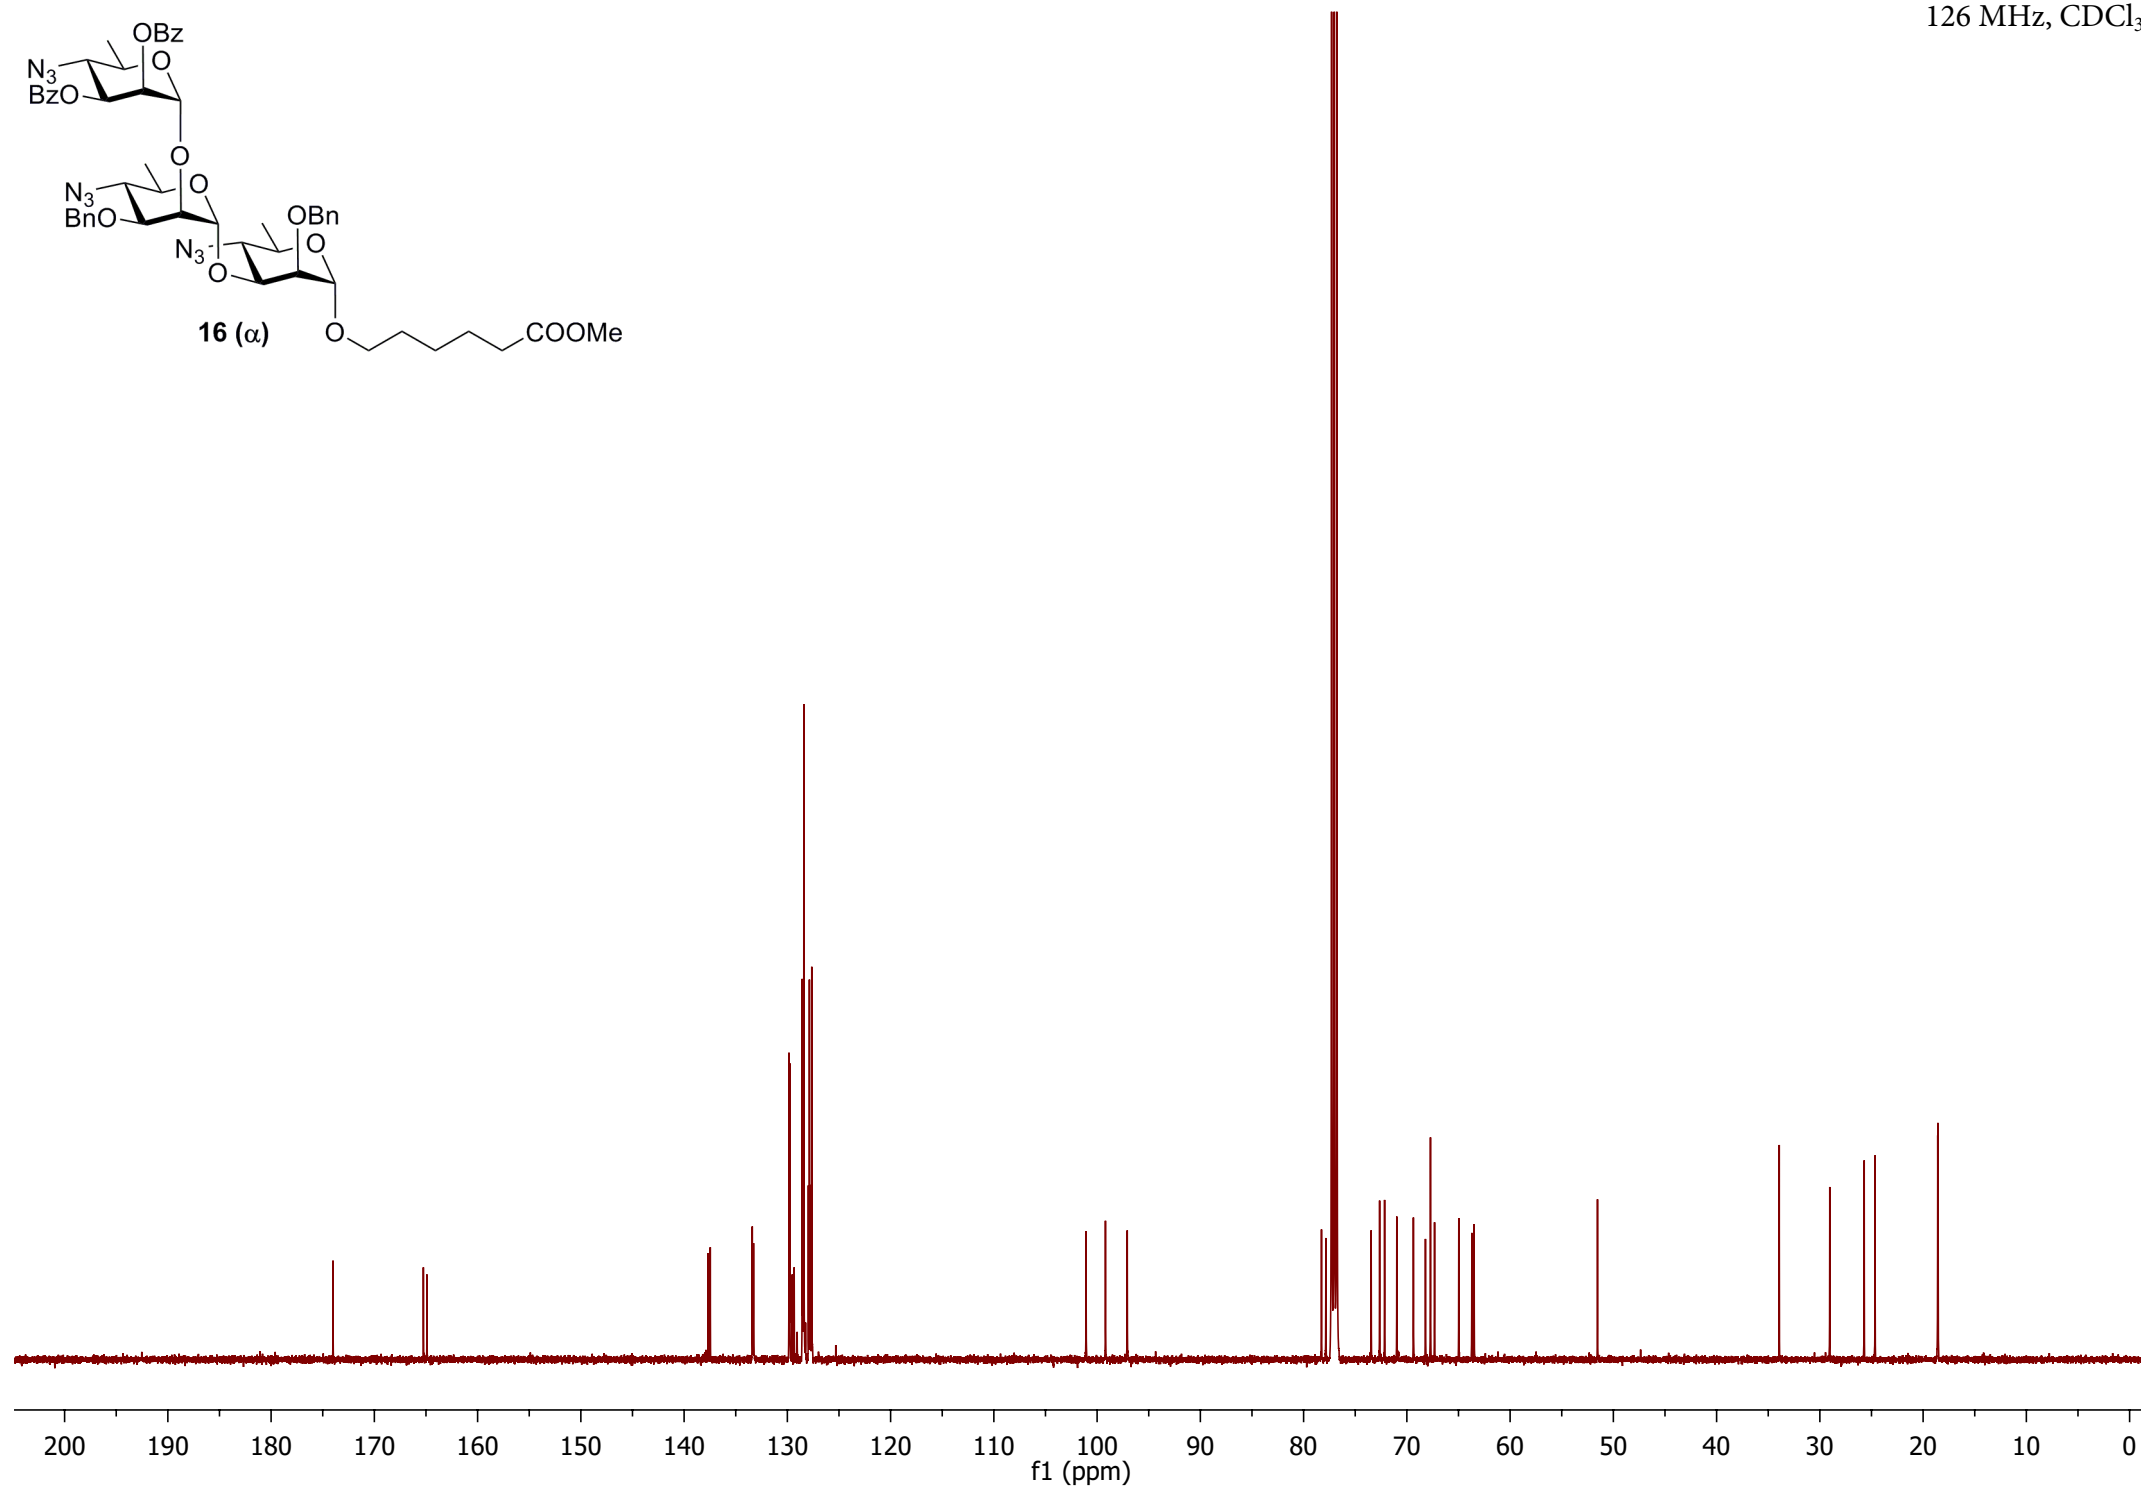

600 MHz, CDCl<sub>3</sub>

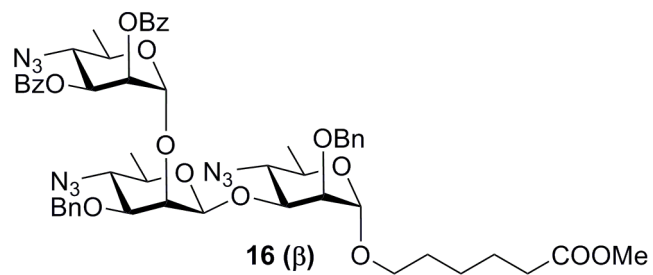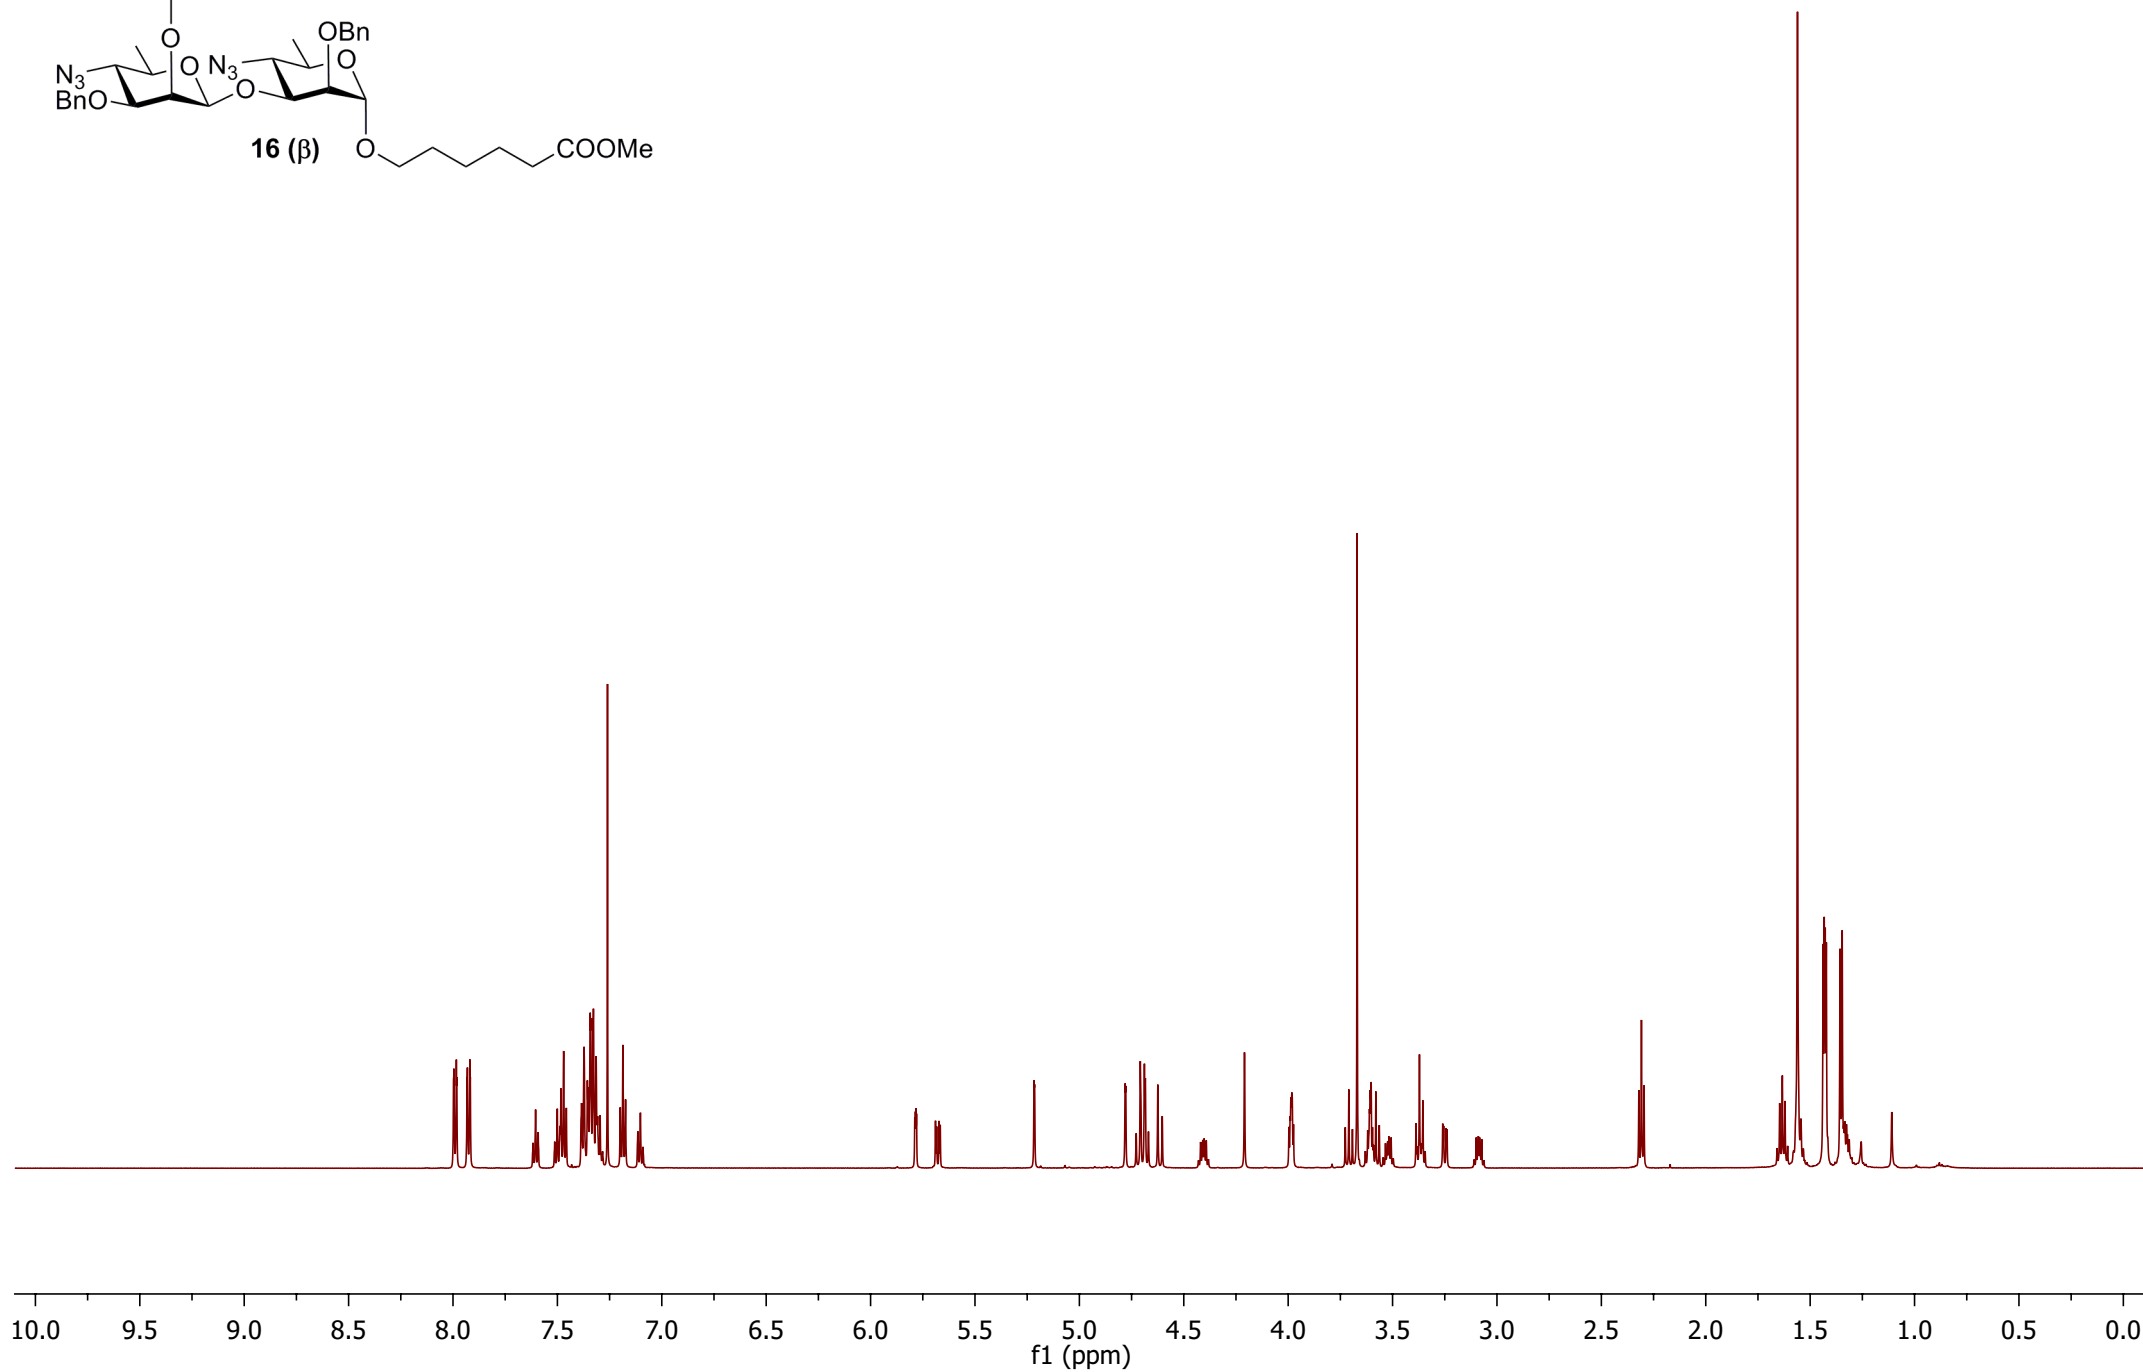

126 MHz, CDCl<sub>3</sub>

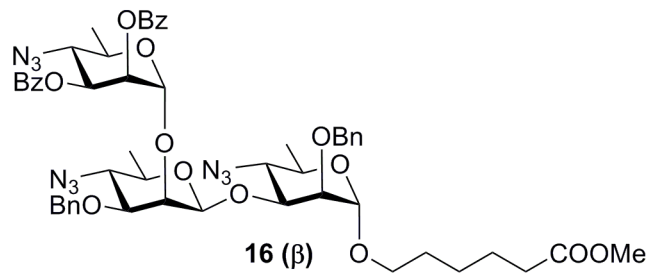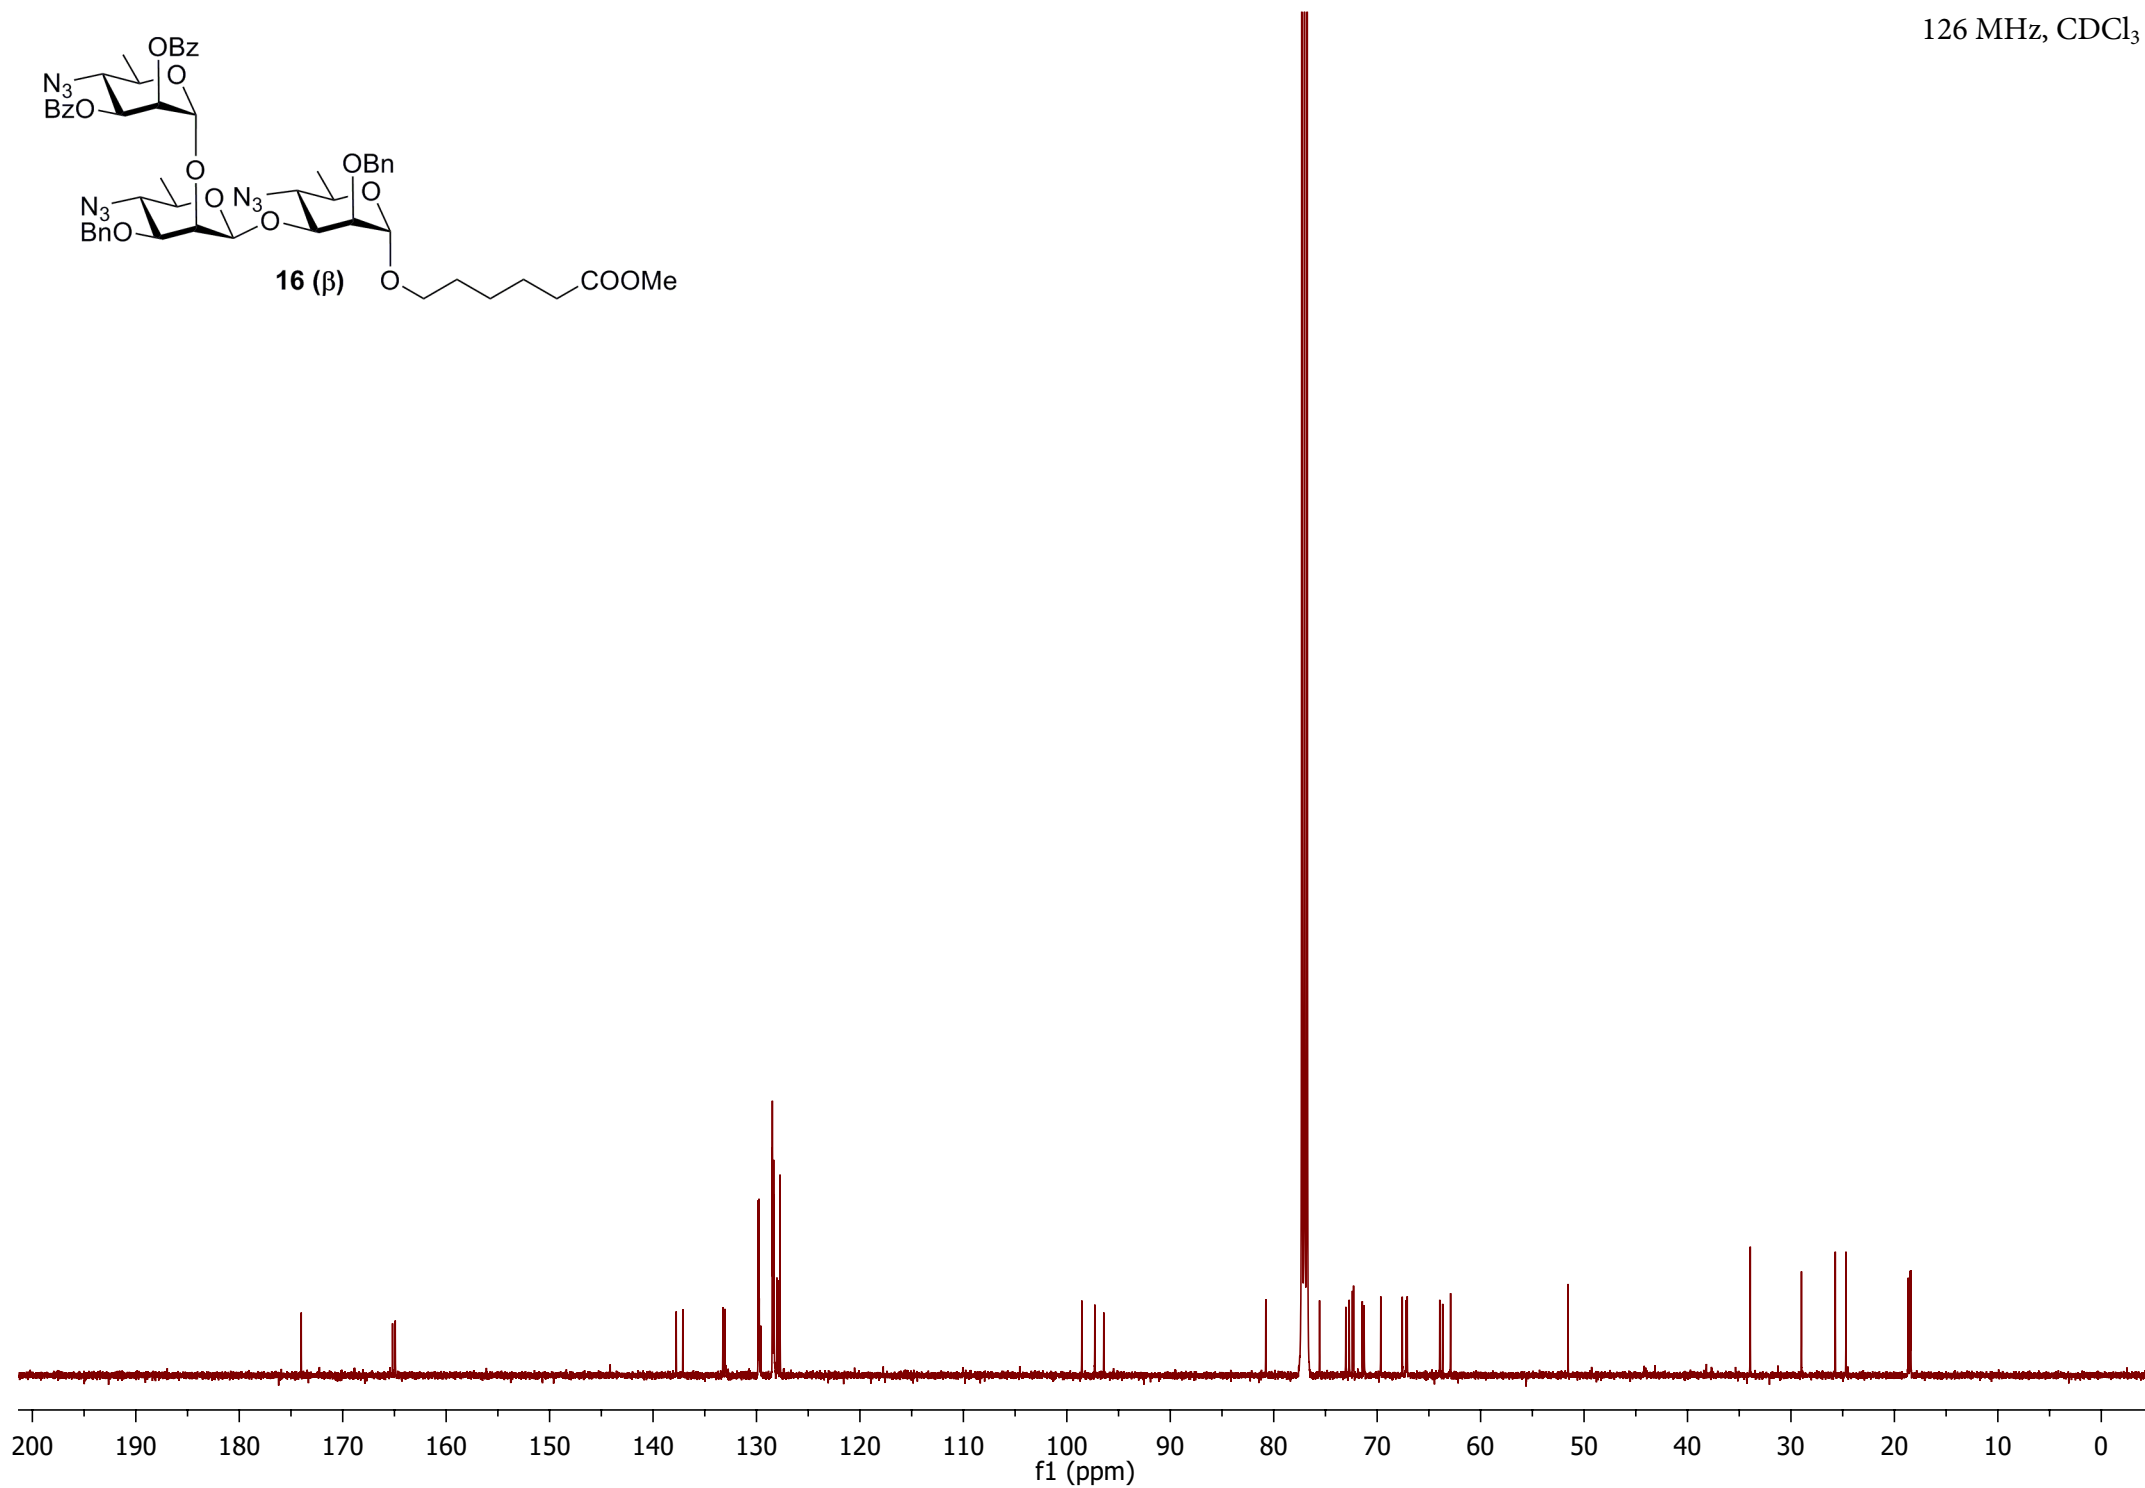

500 MHz, CDCl<sub>3</sub>

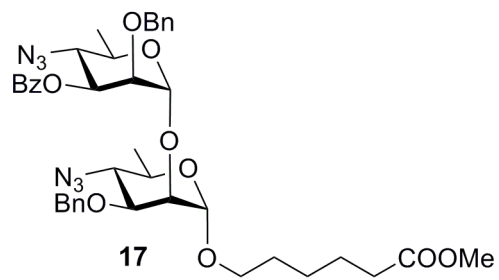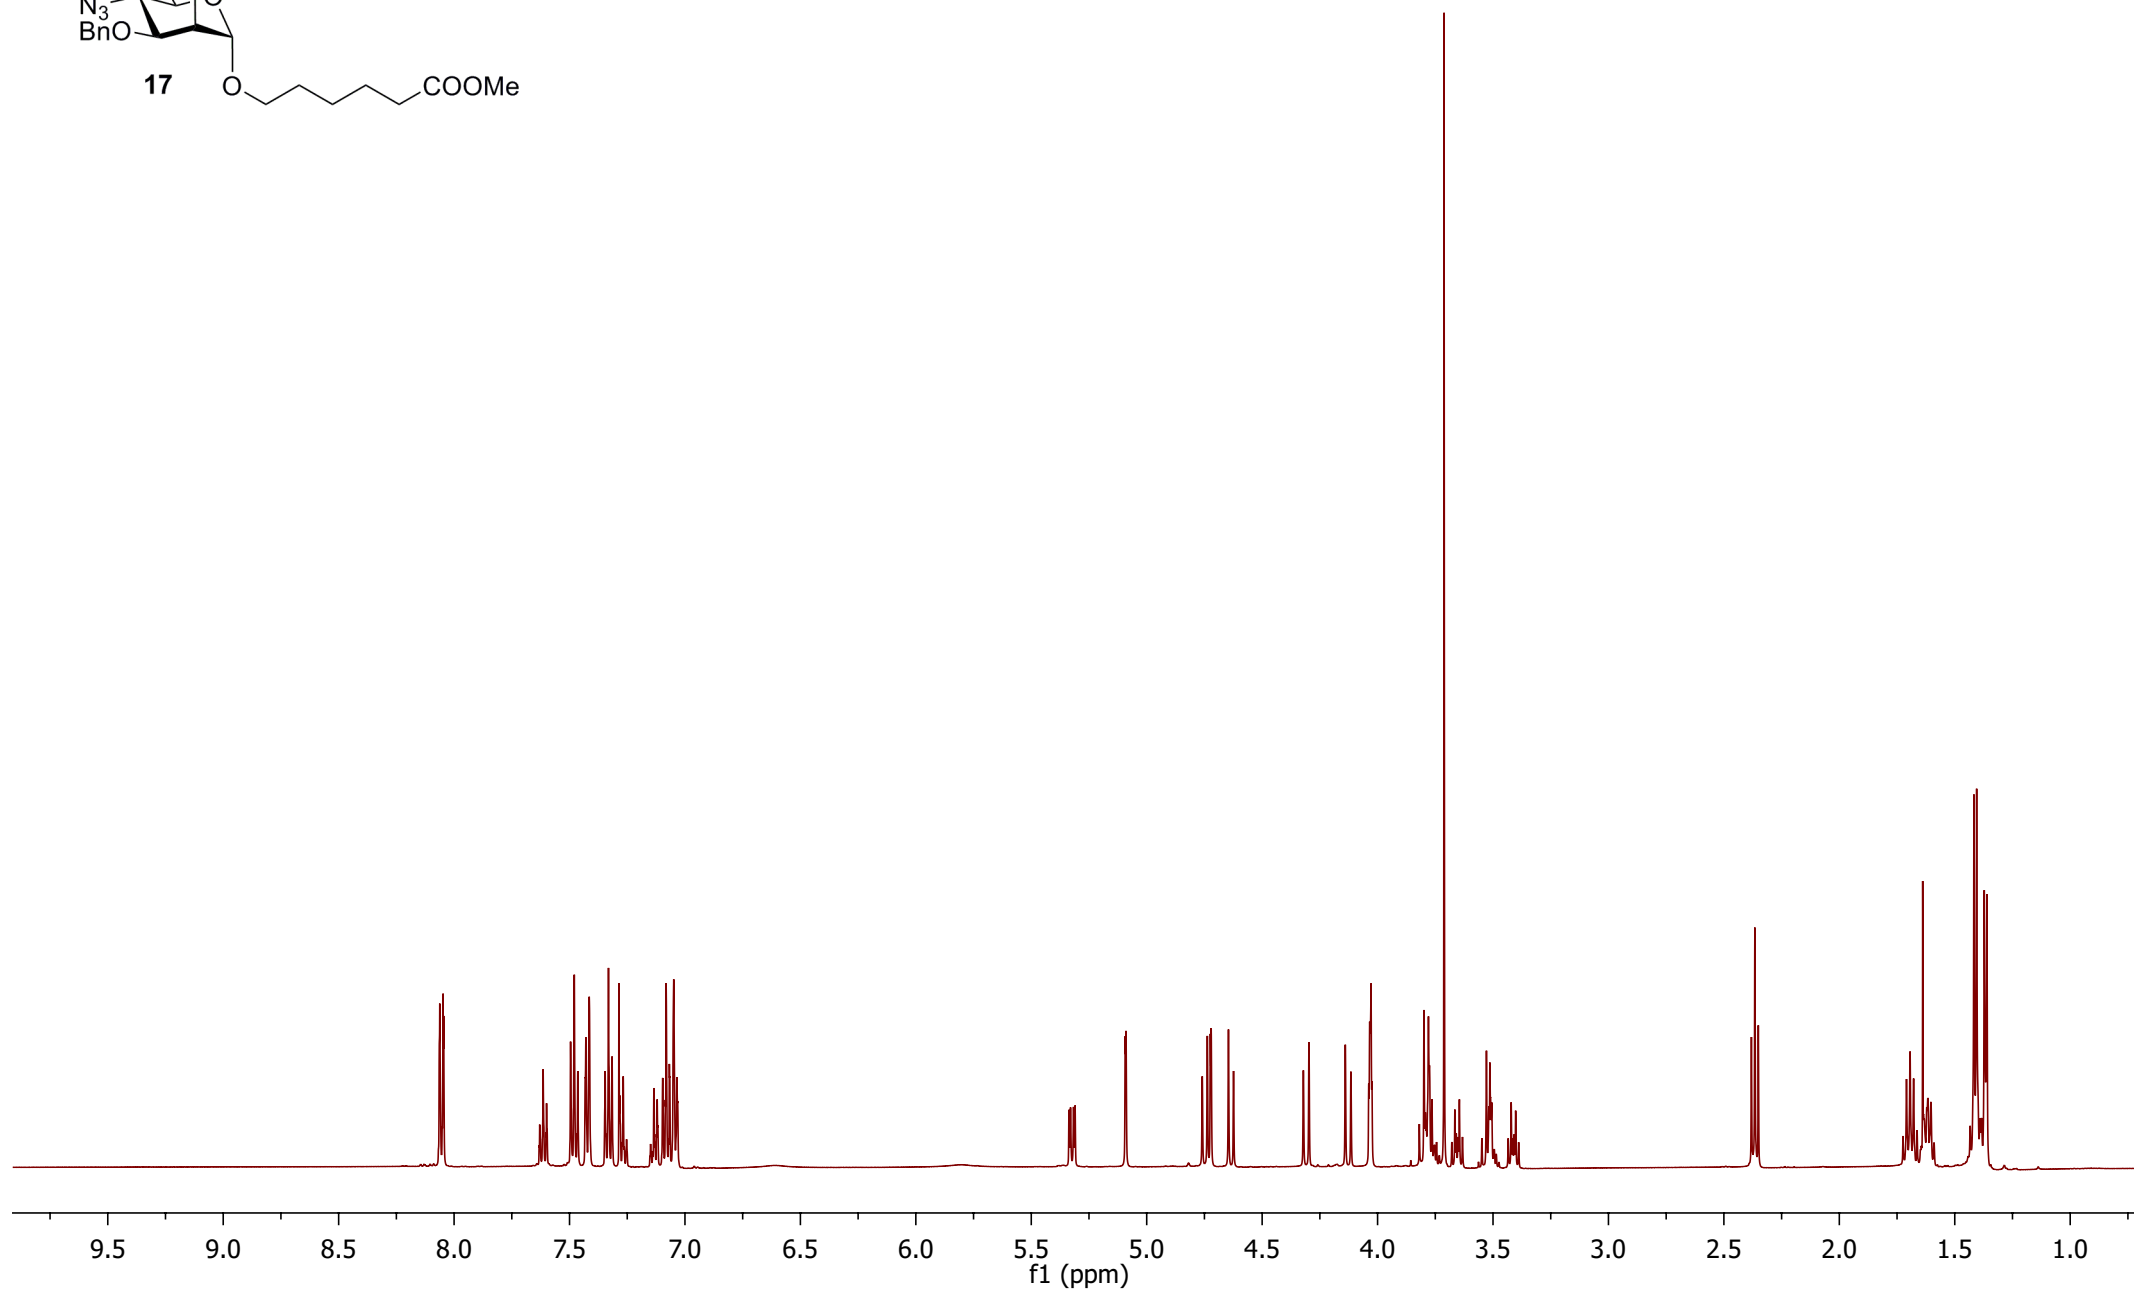

126 MHz, CDCl<sub>3</sub>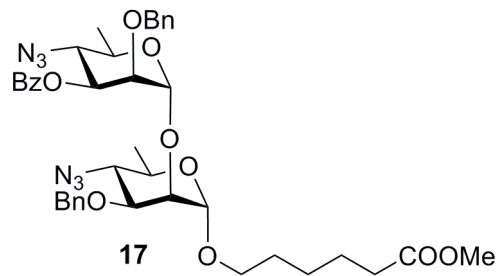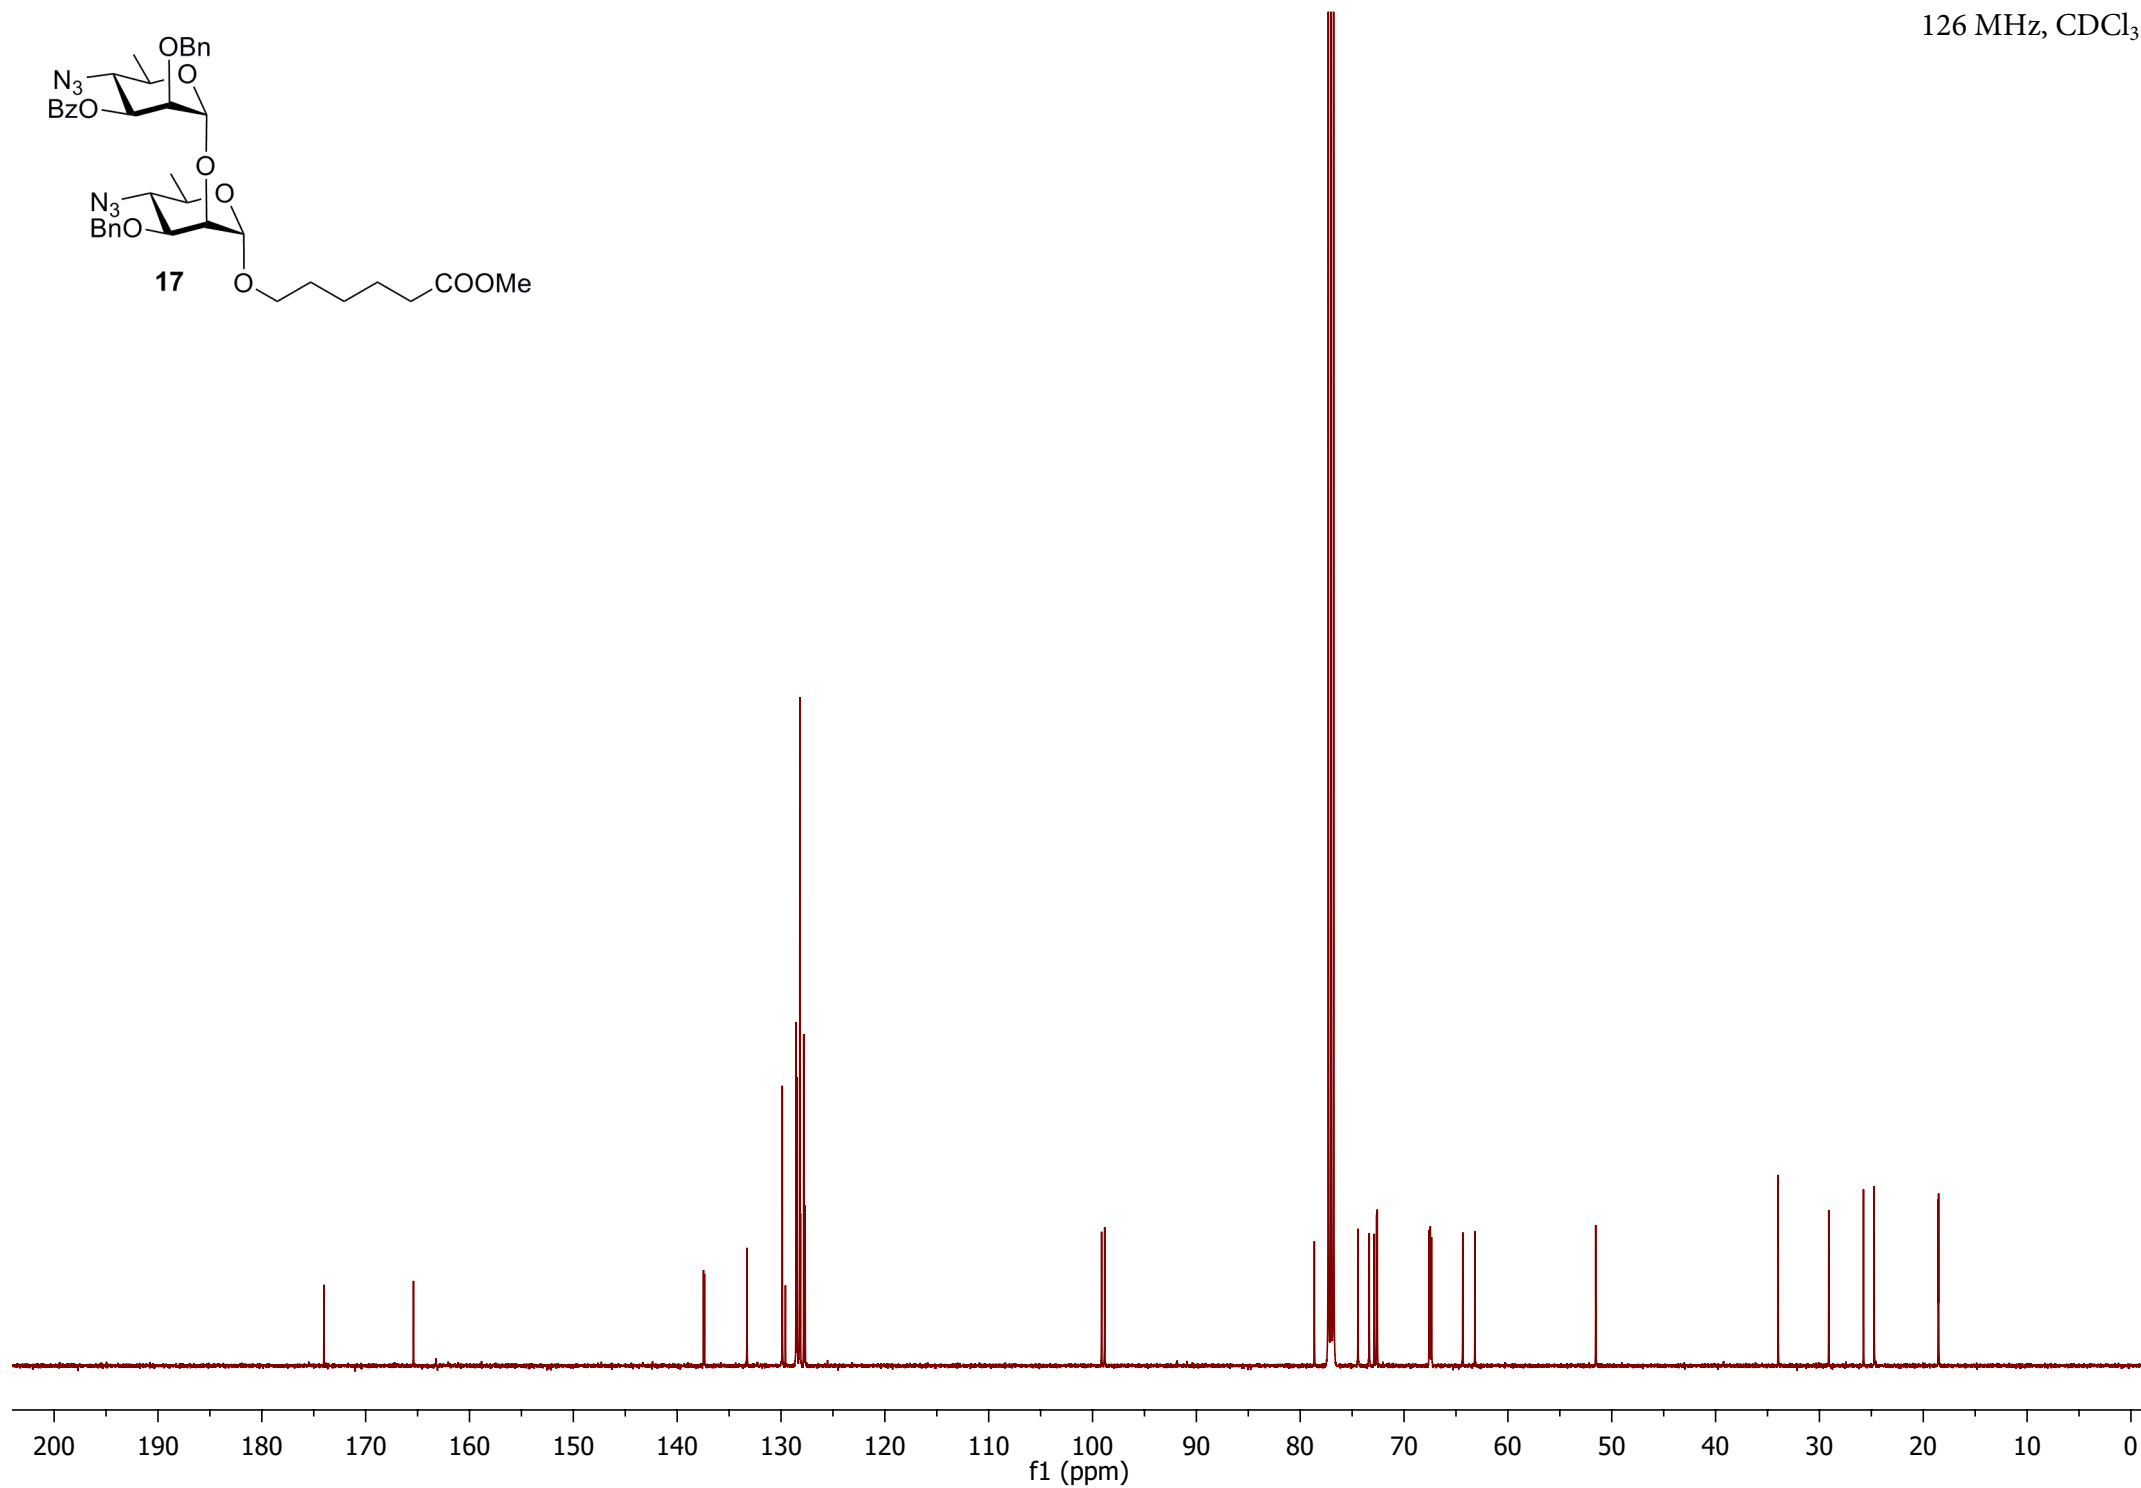



500 MHz, CDCl<sub>3</sub>

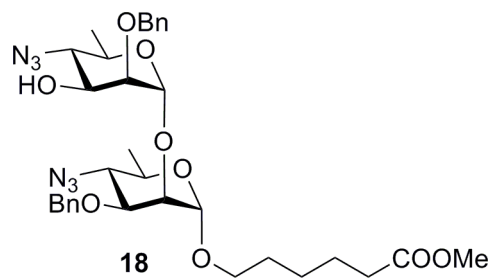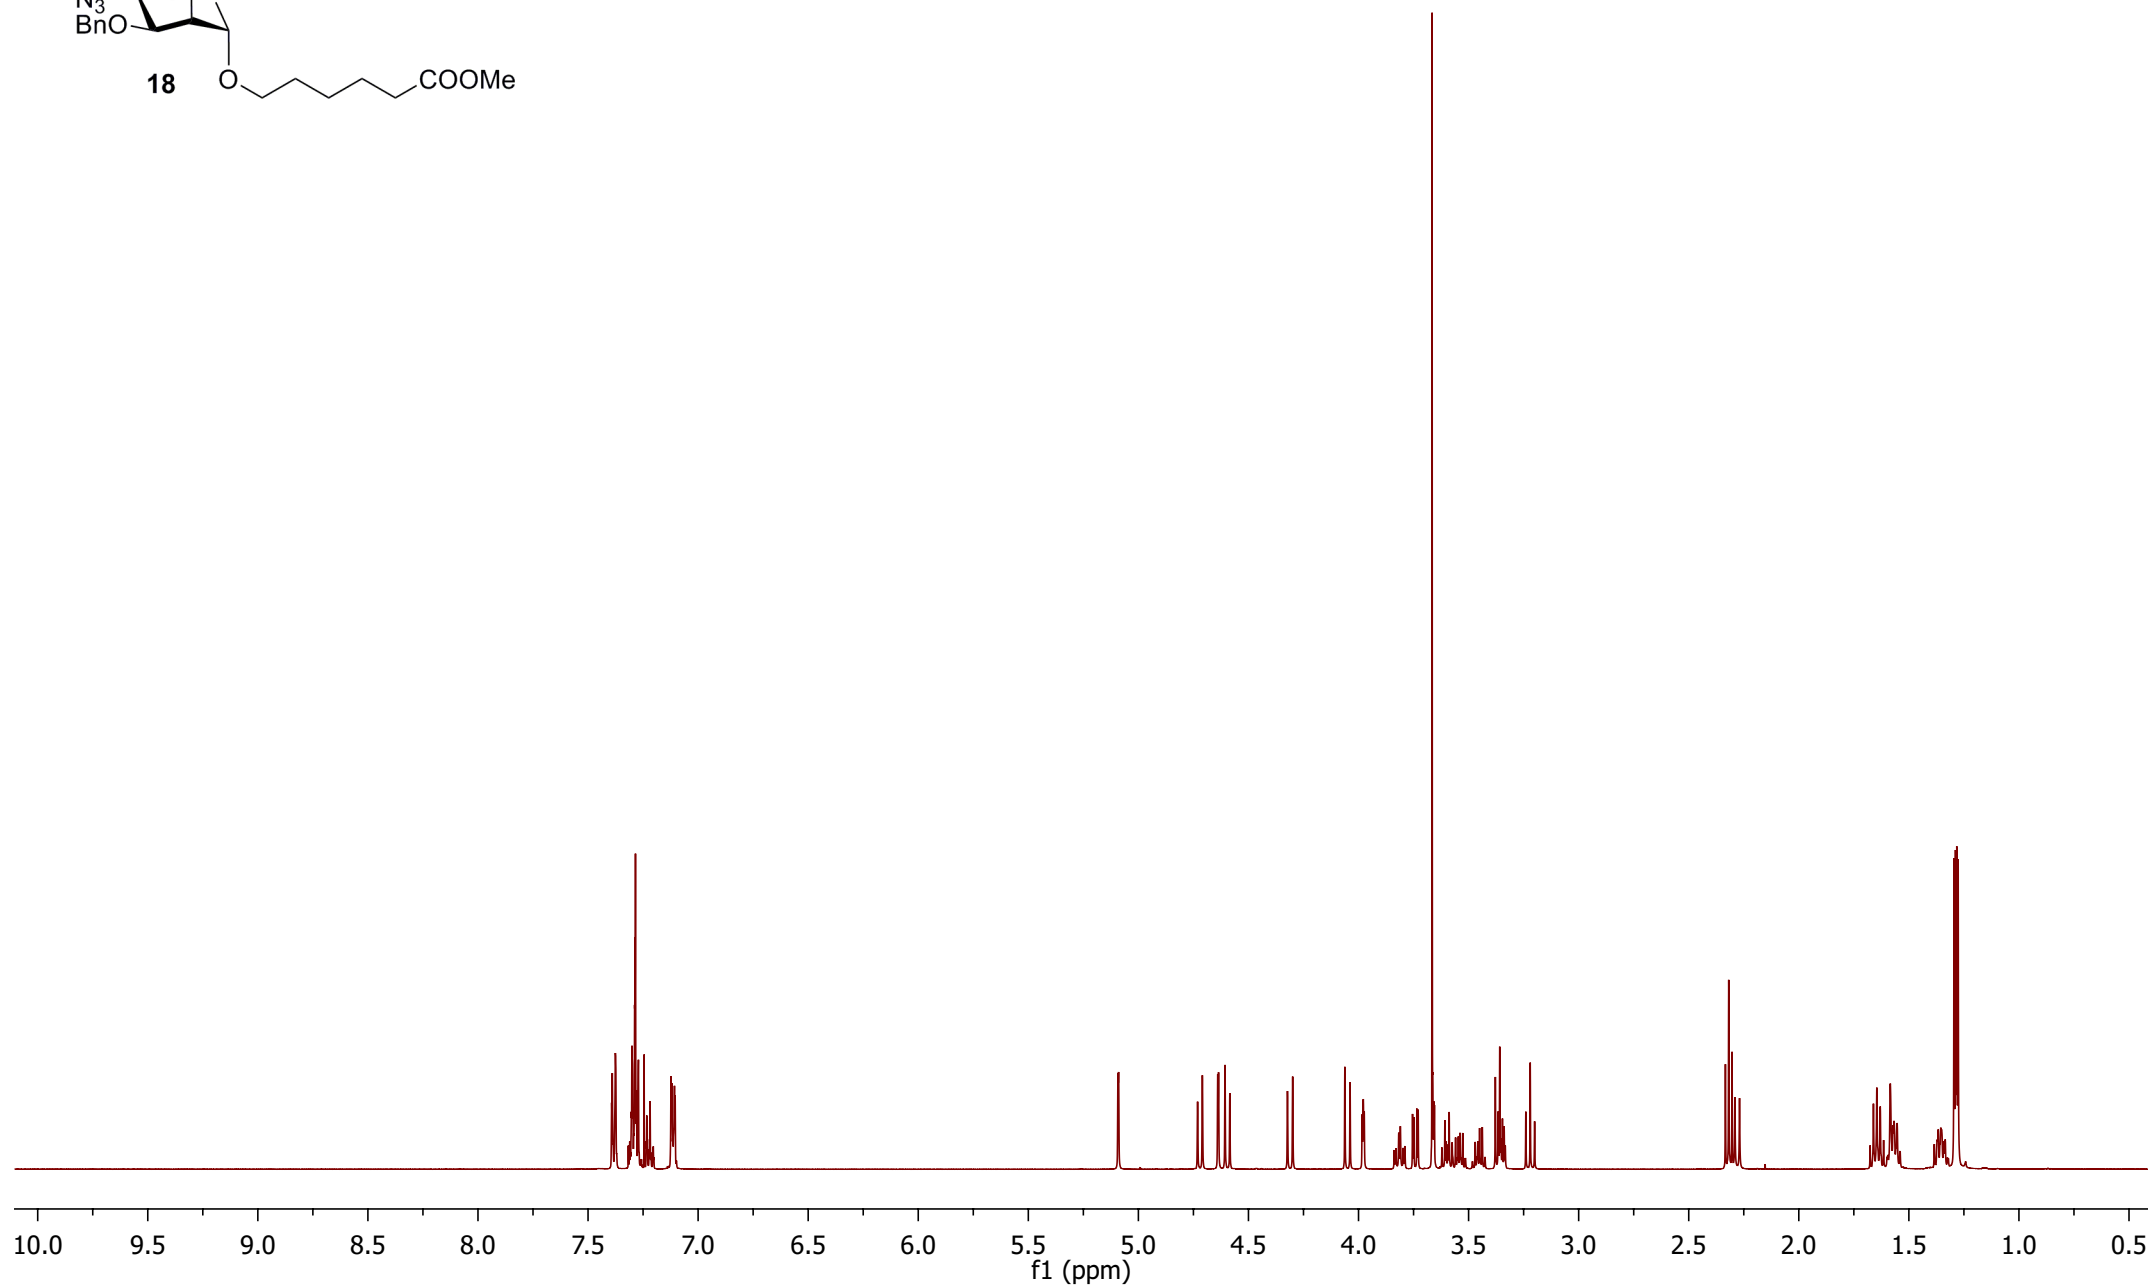

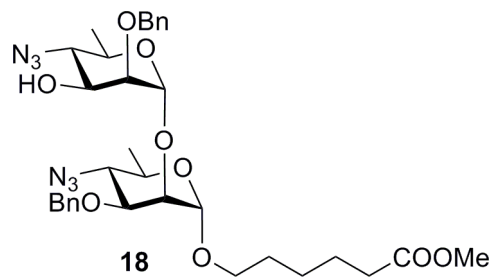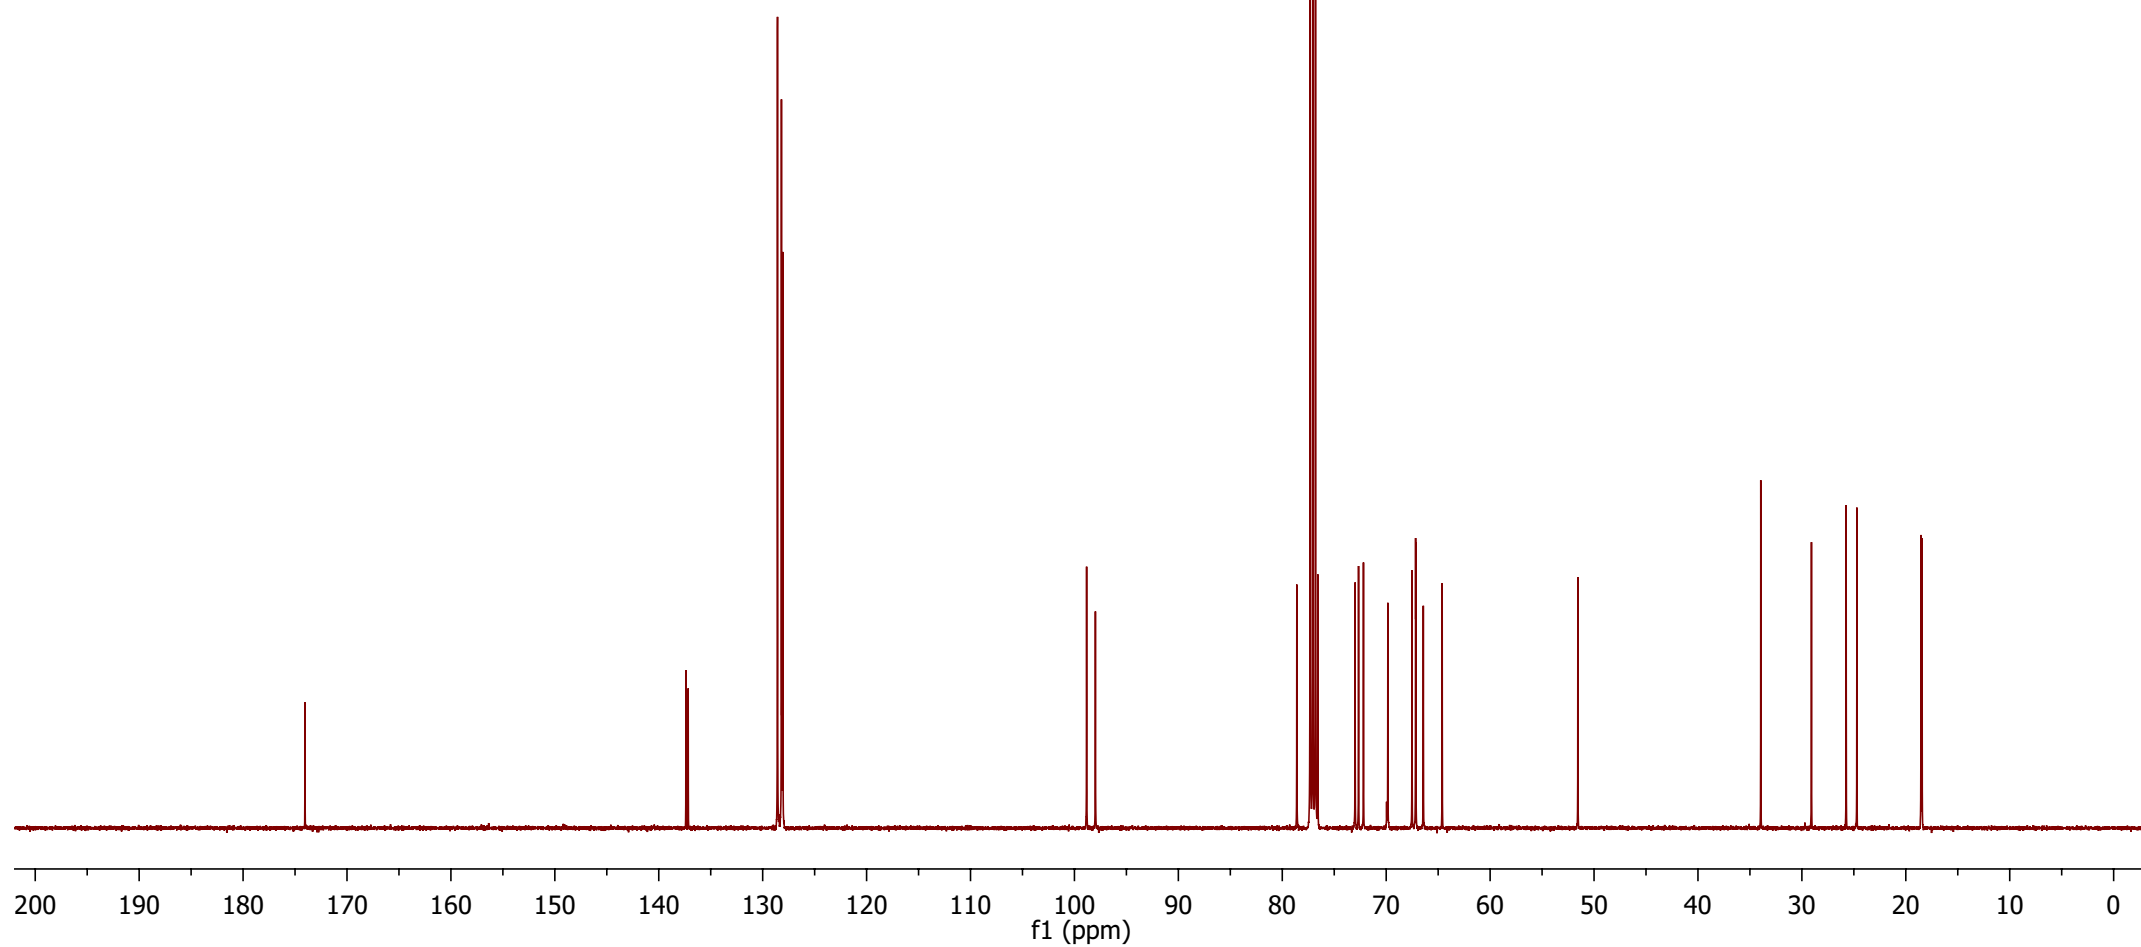

500 MHz, CDCl<sub>3</sub>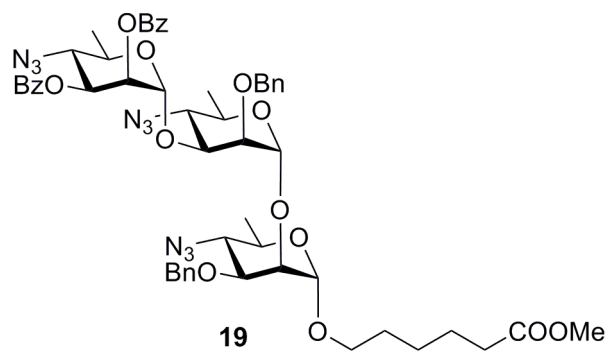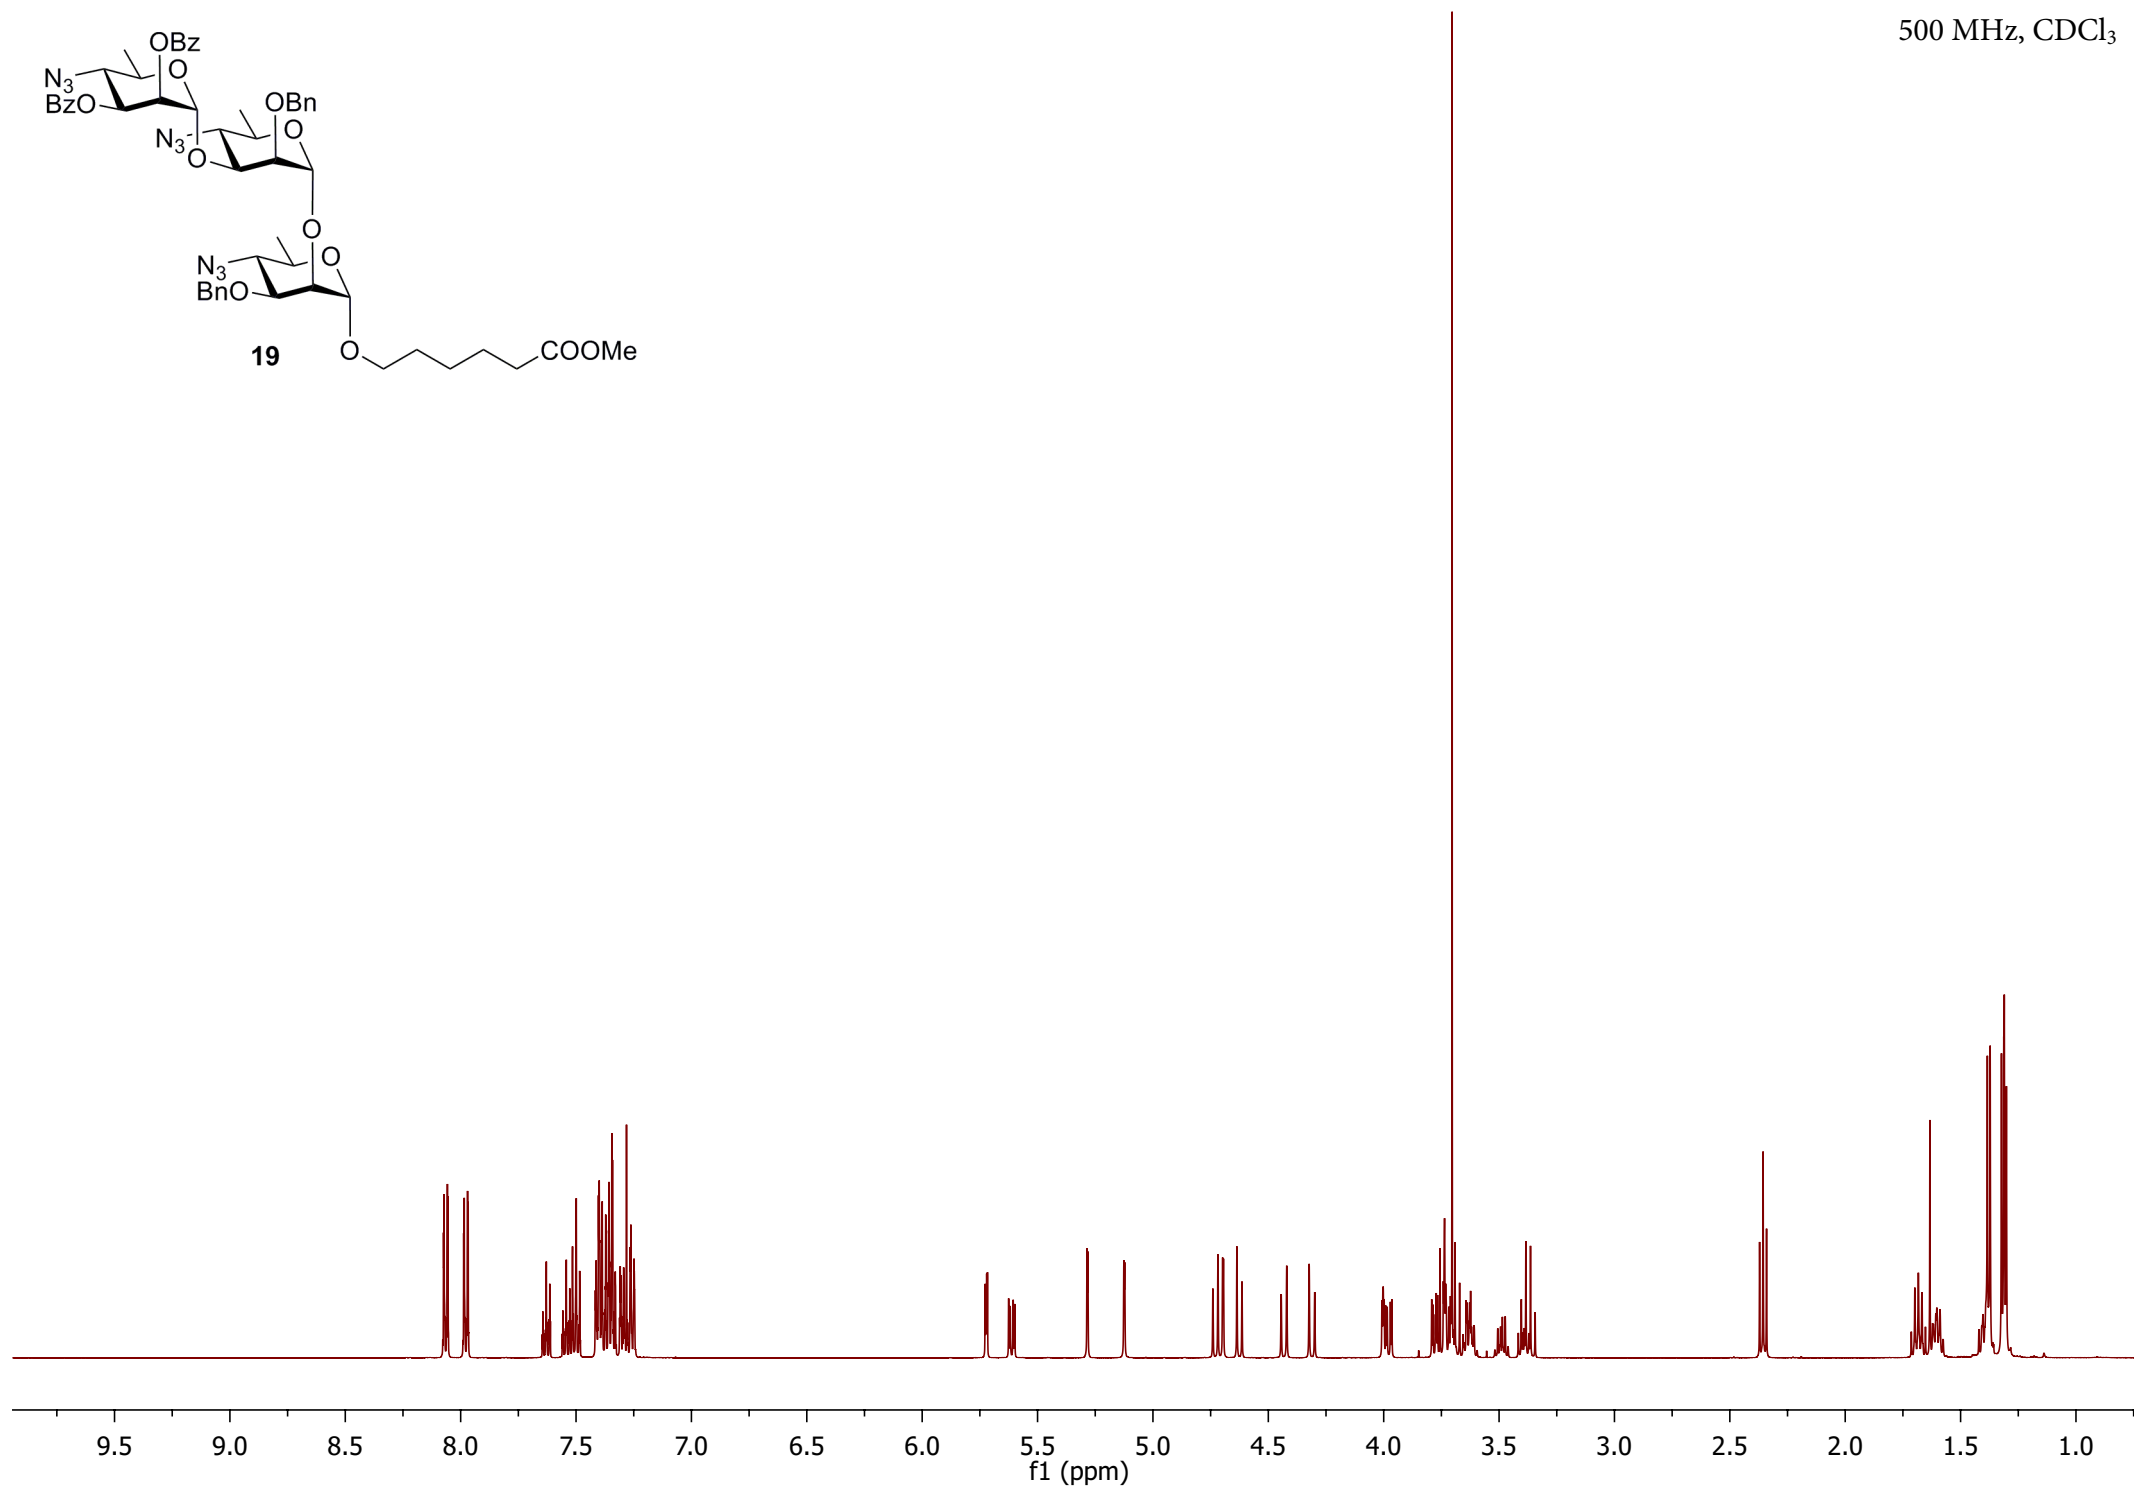

126 MHz, CDCl<sub>3</sub>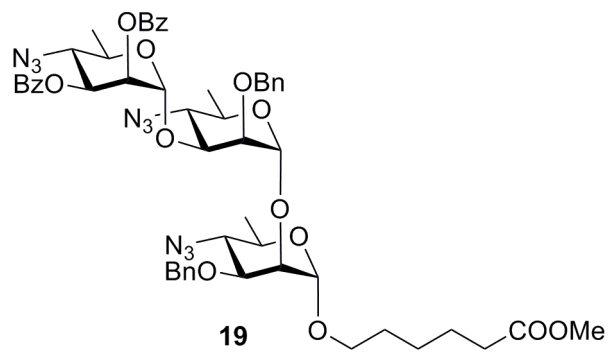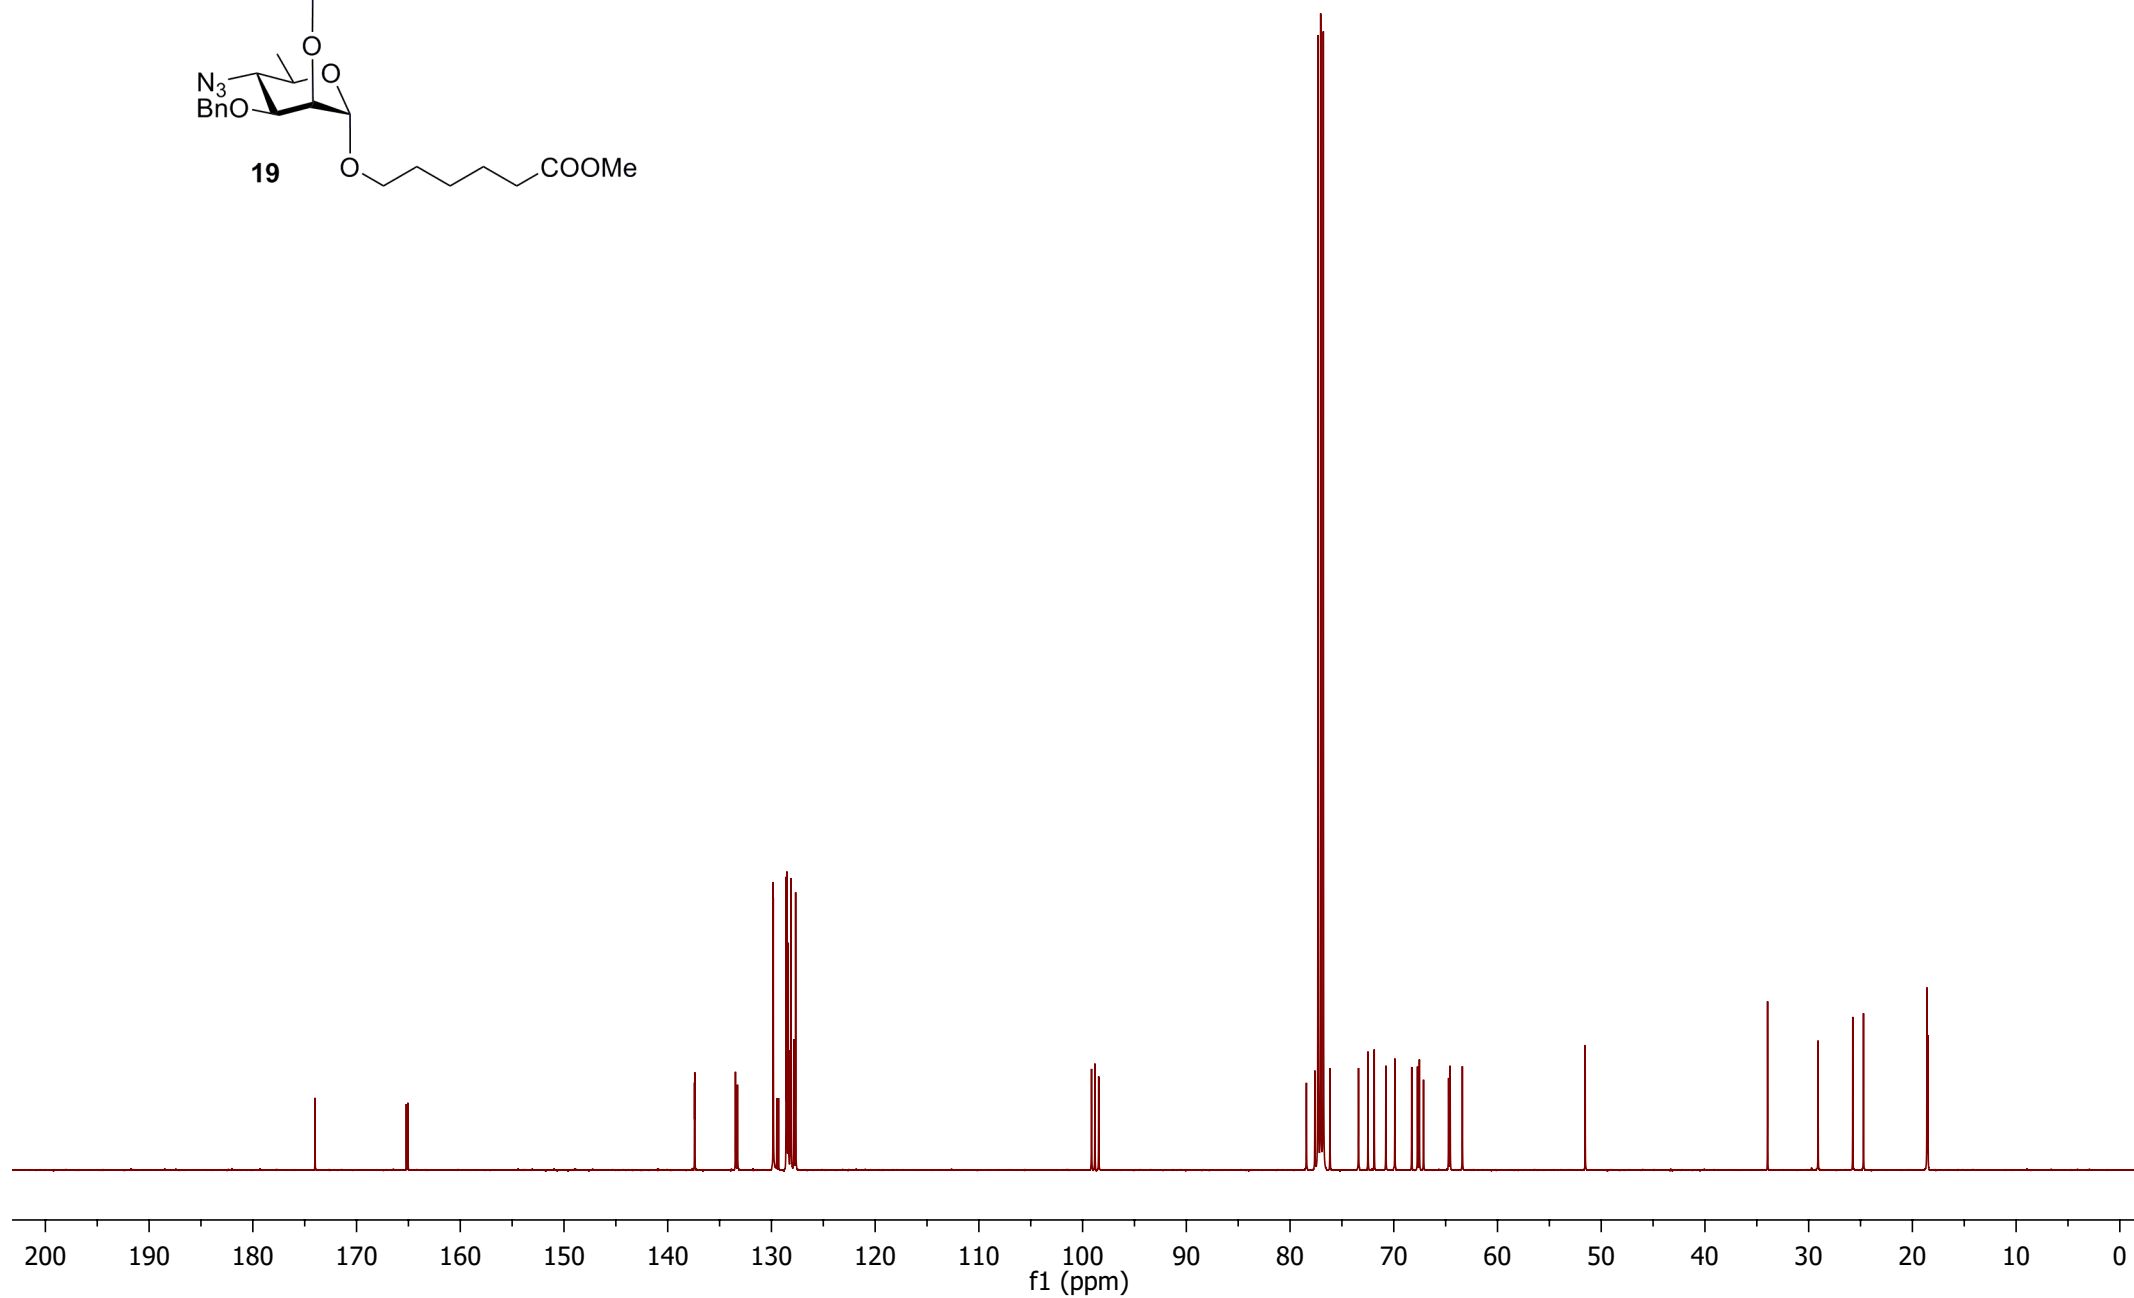

600 MHz, CDCl<sub>3</sub>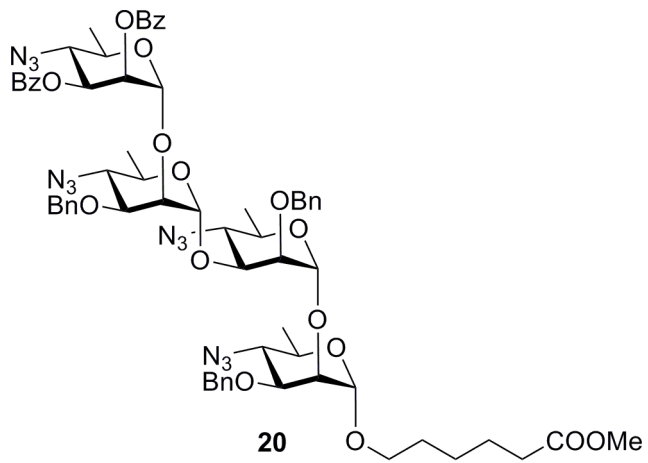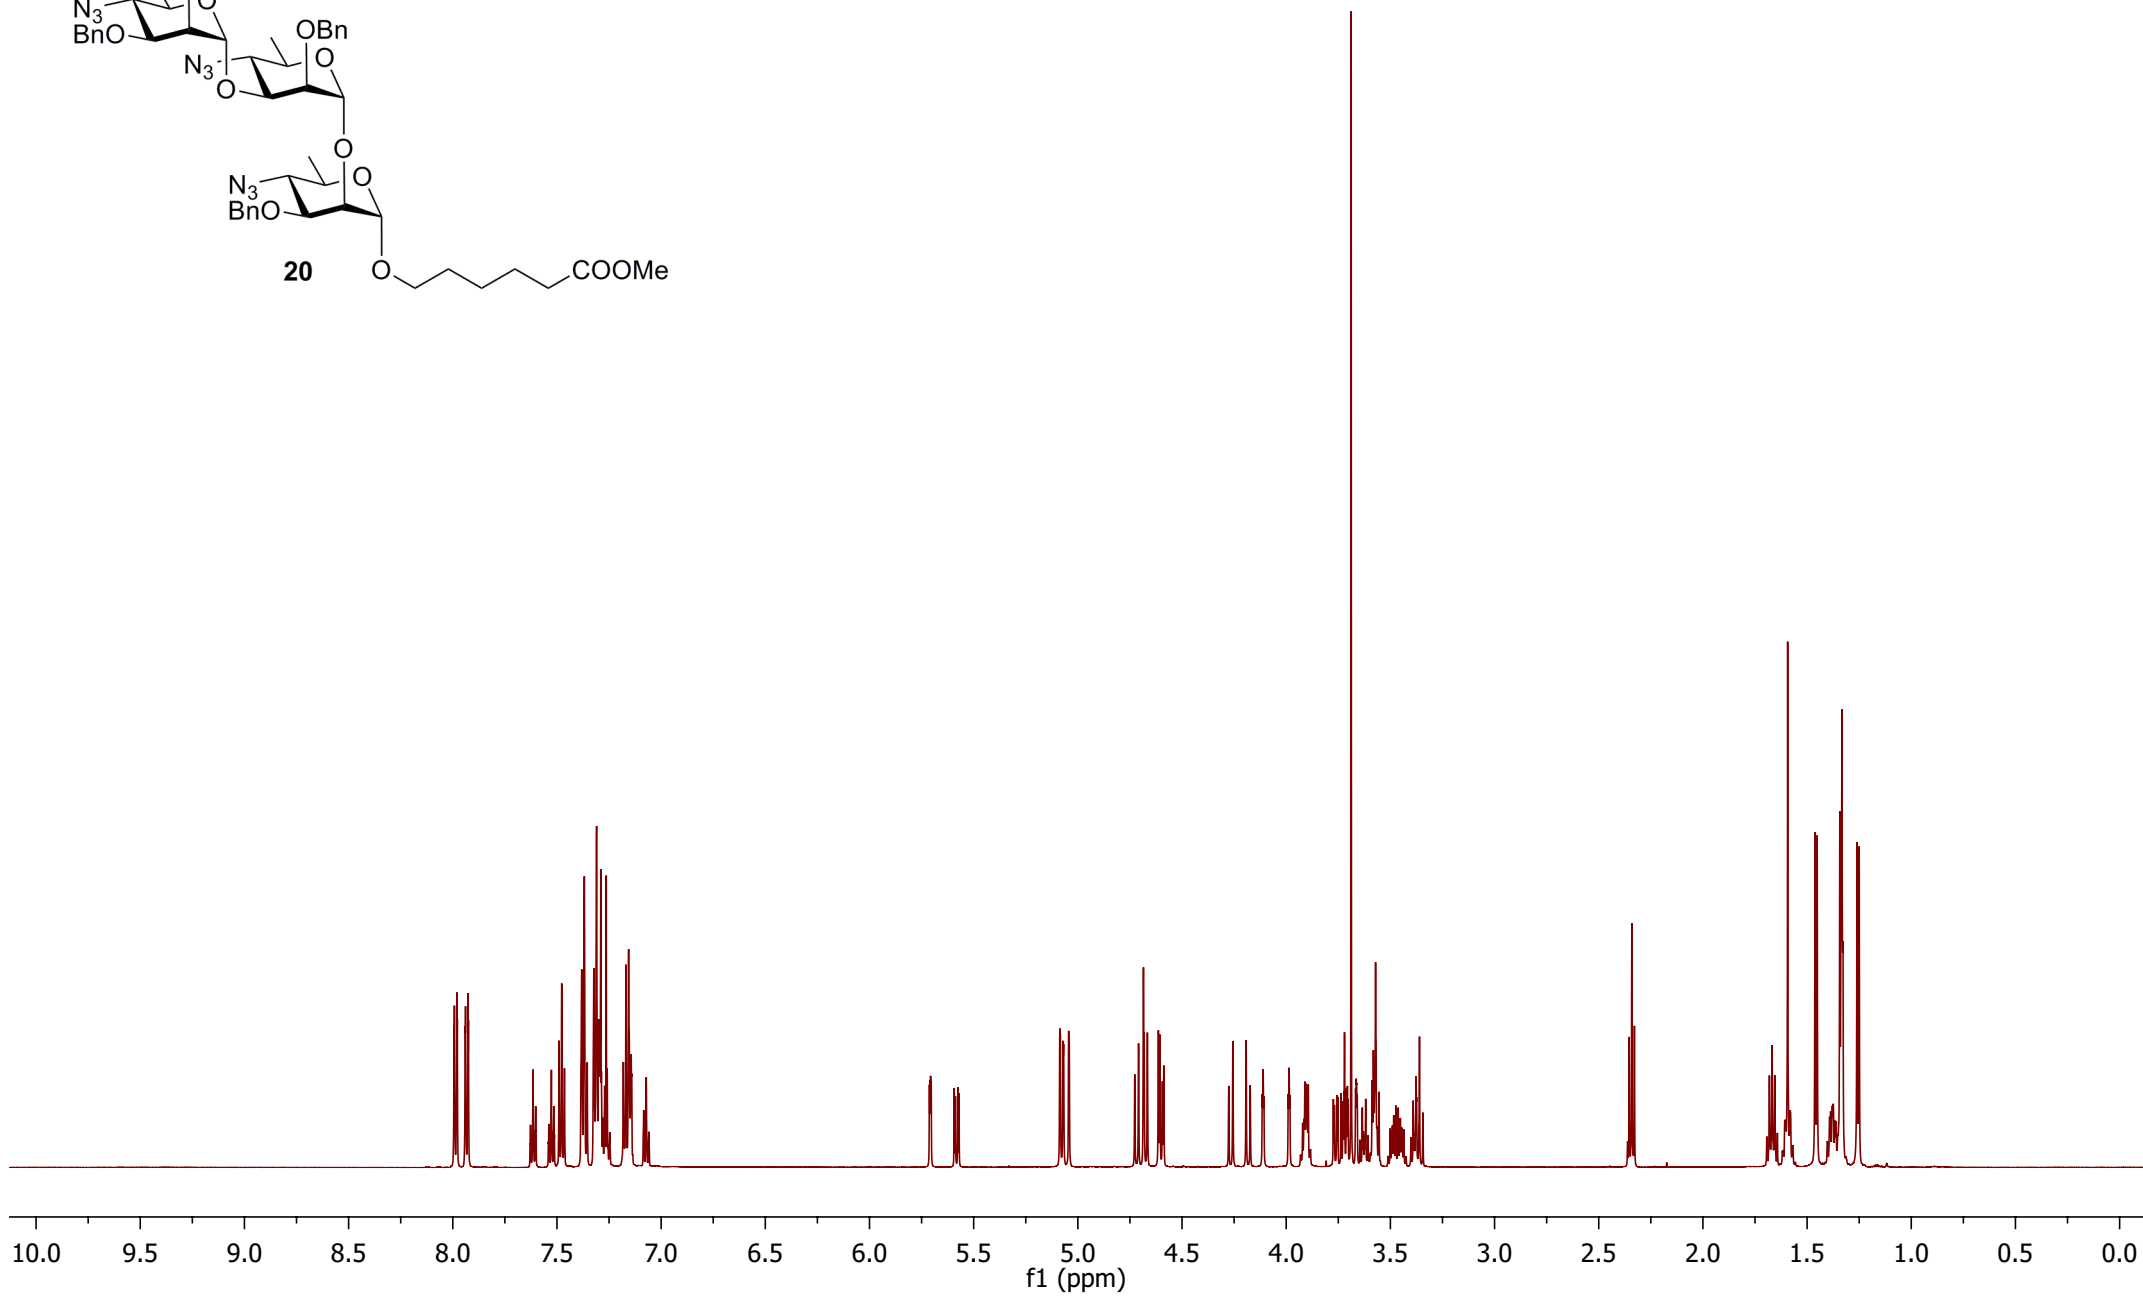

126 MHz, CDCl<sub>3</sub>

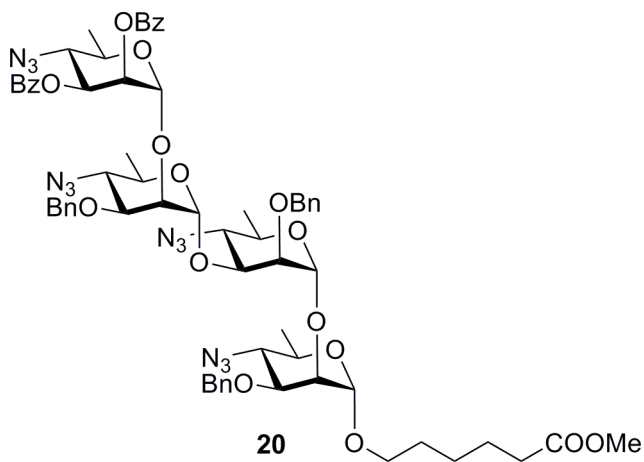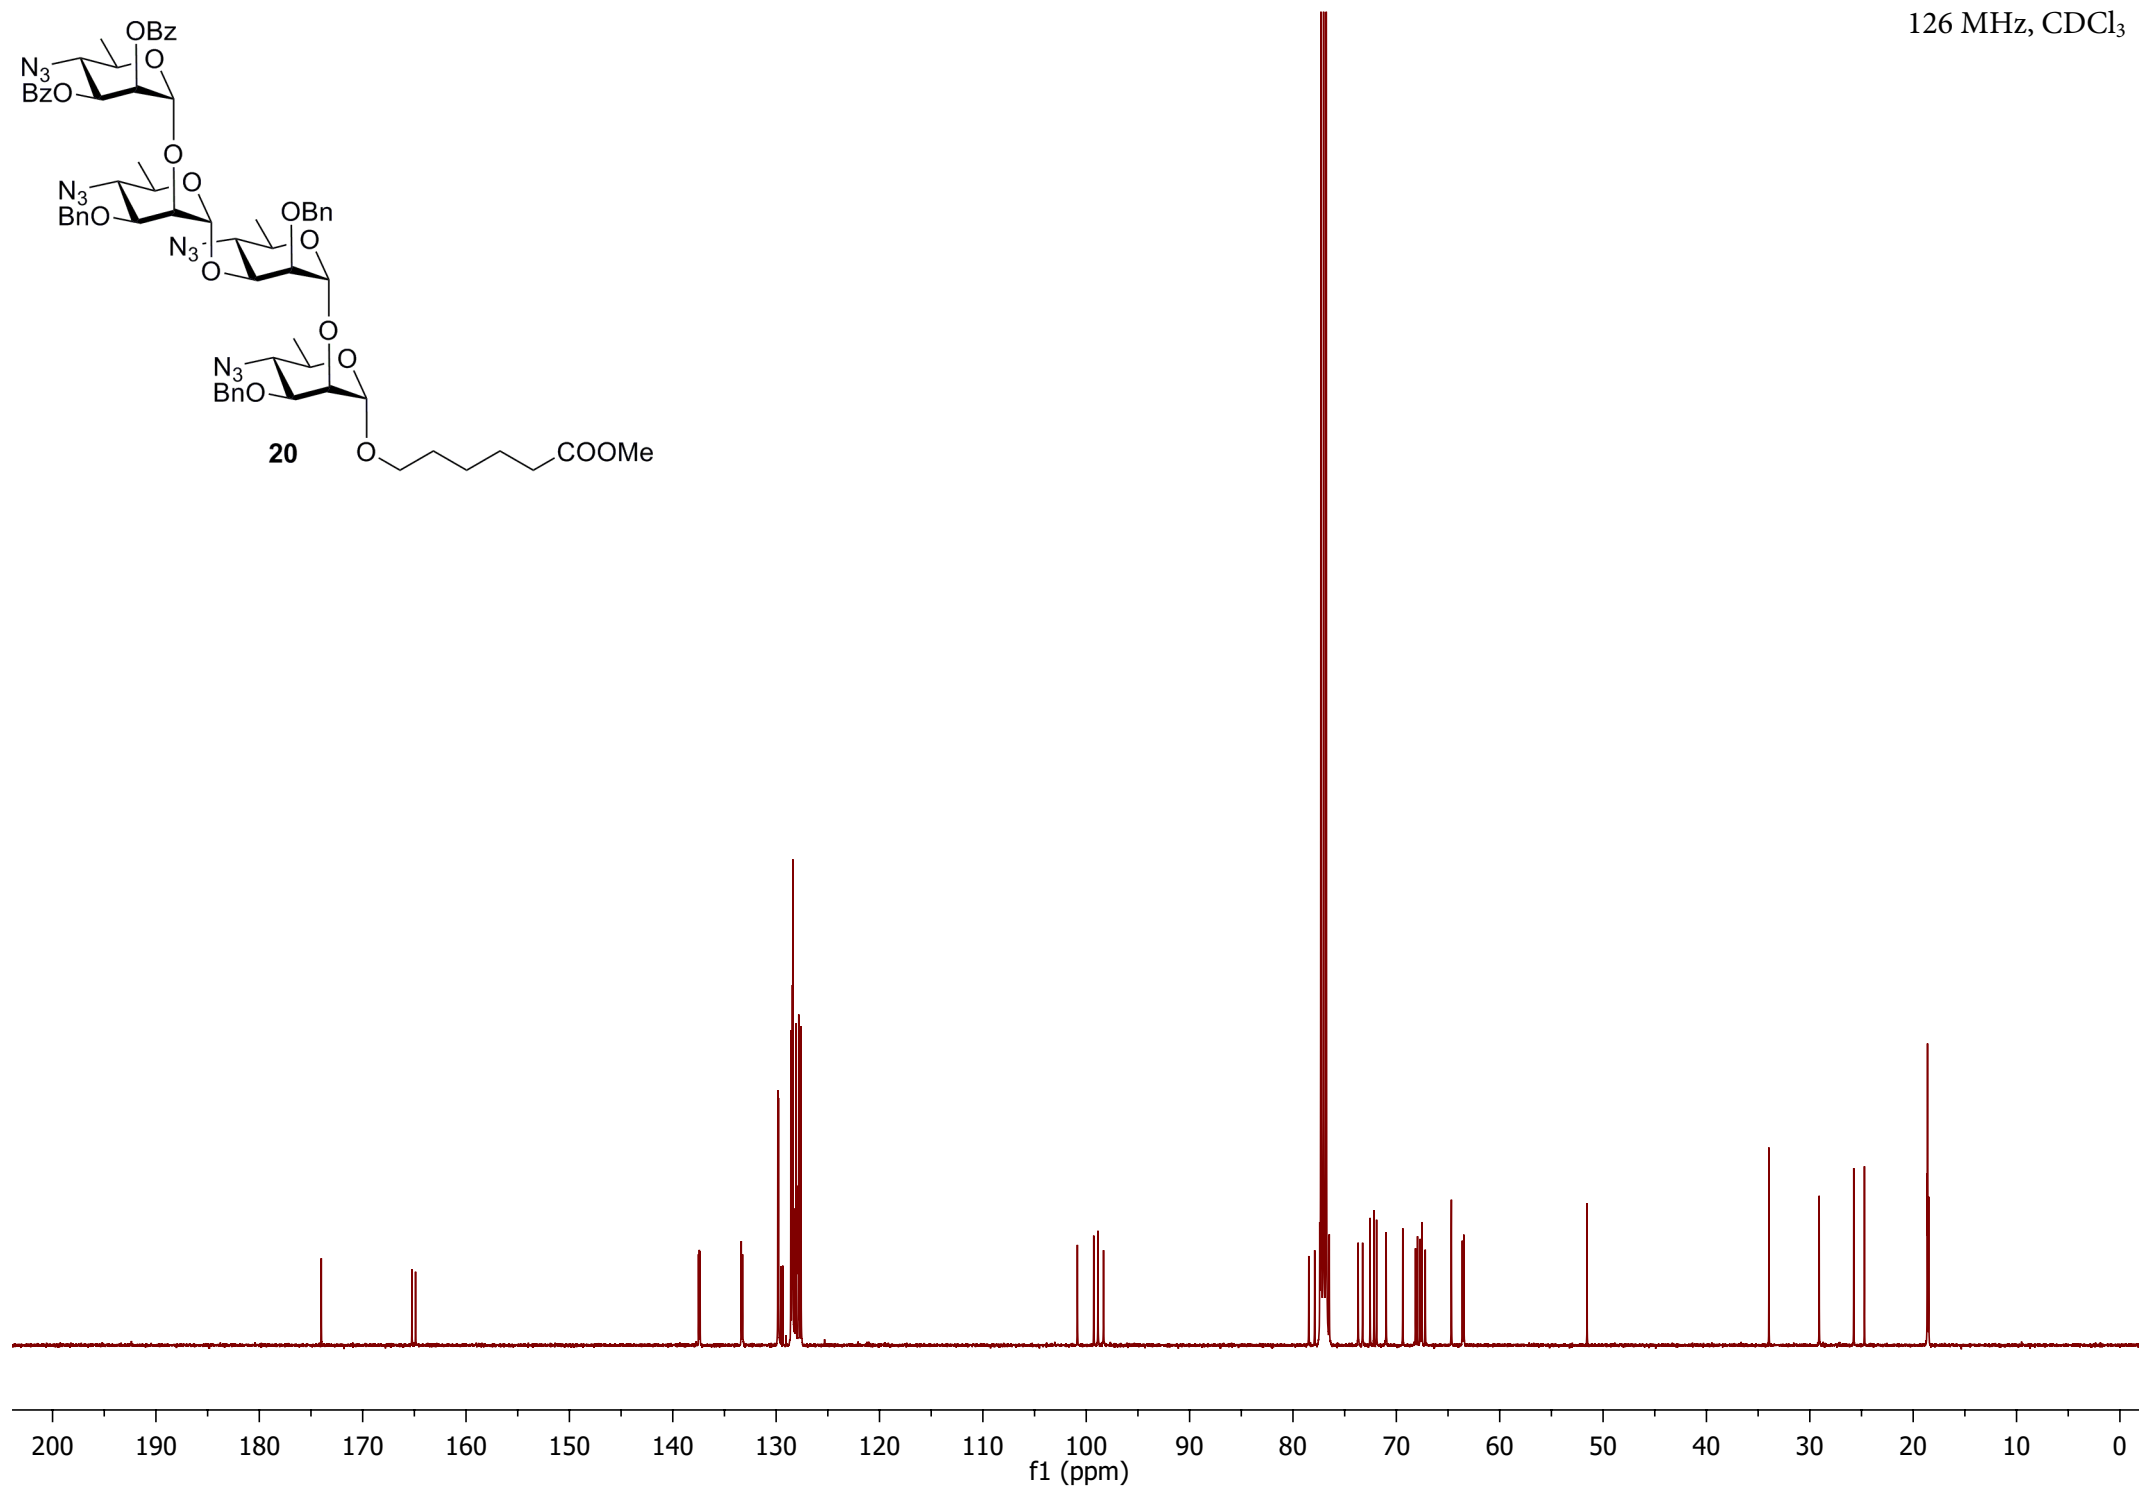

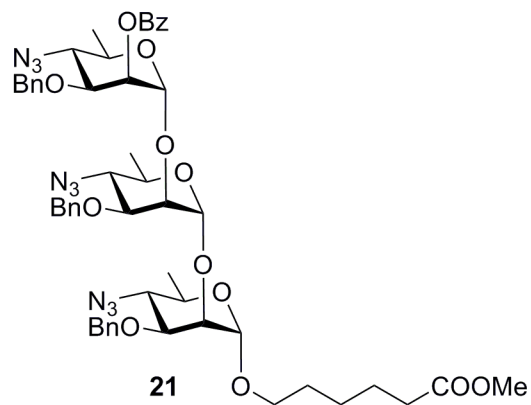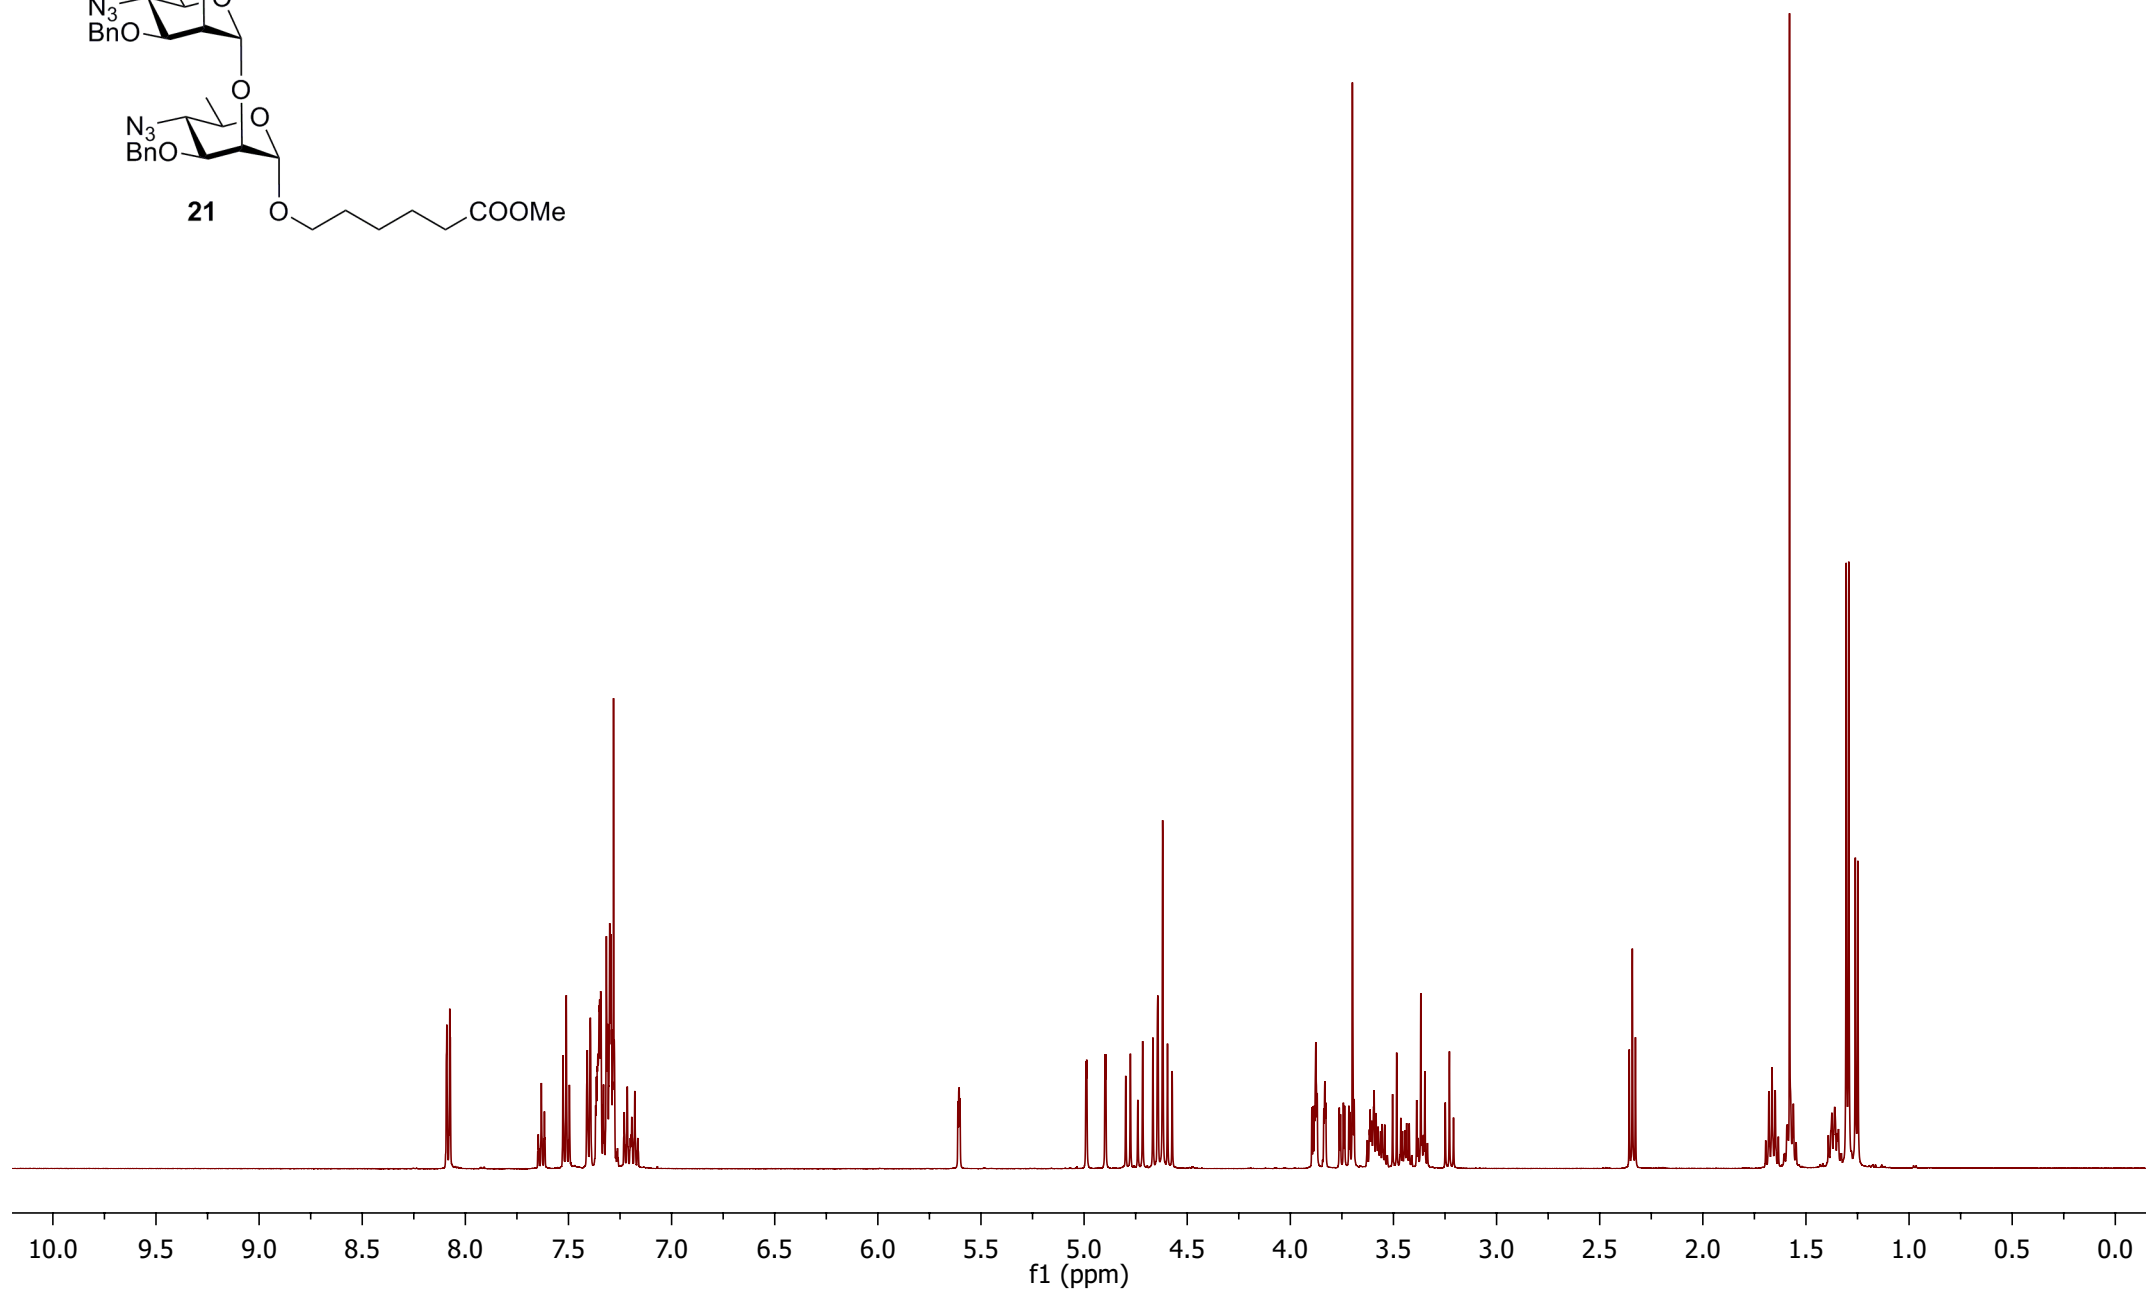

126 MHz, CDCl<sub>3</sub>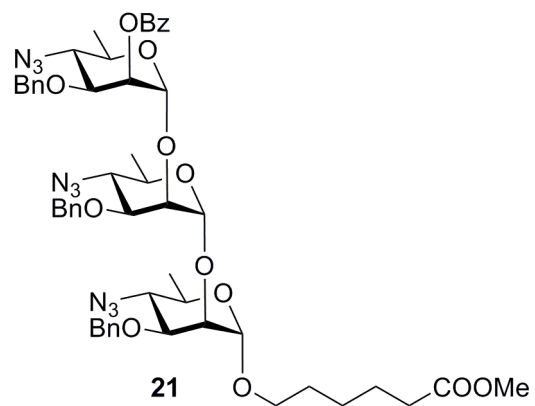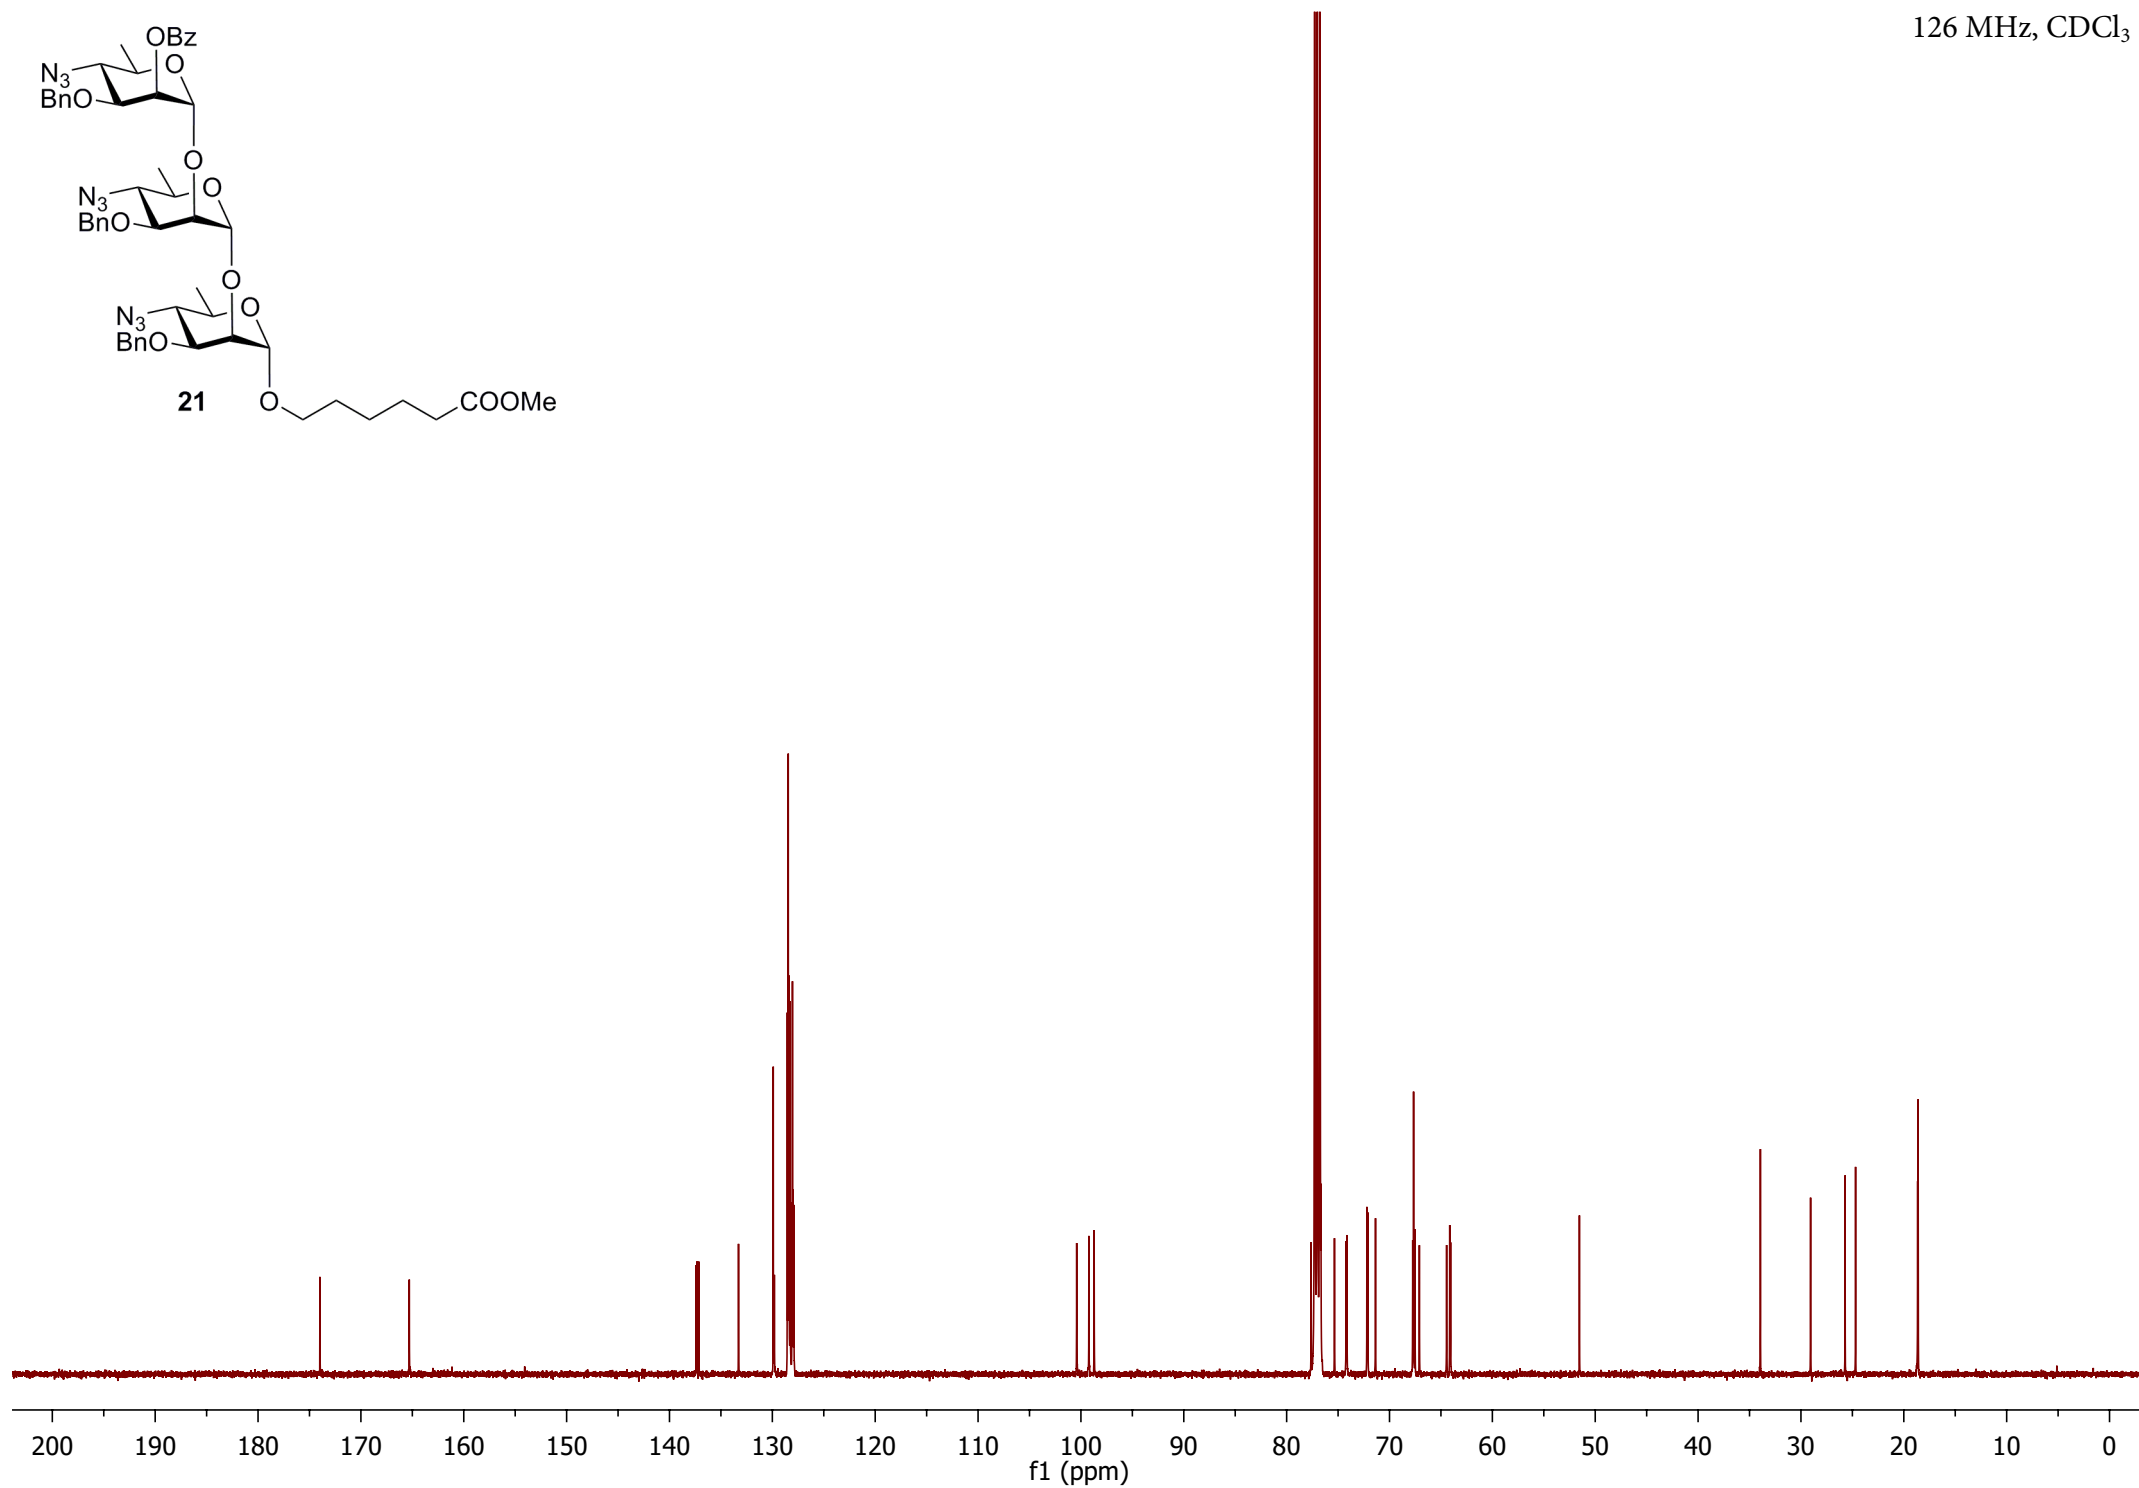



500 MHz, CDCl<sub>3</sub>

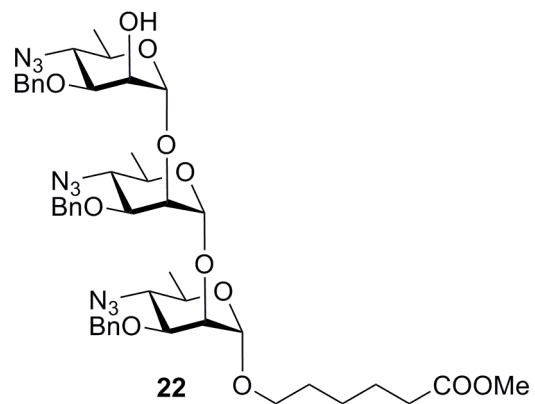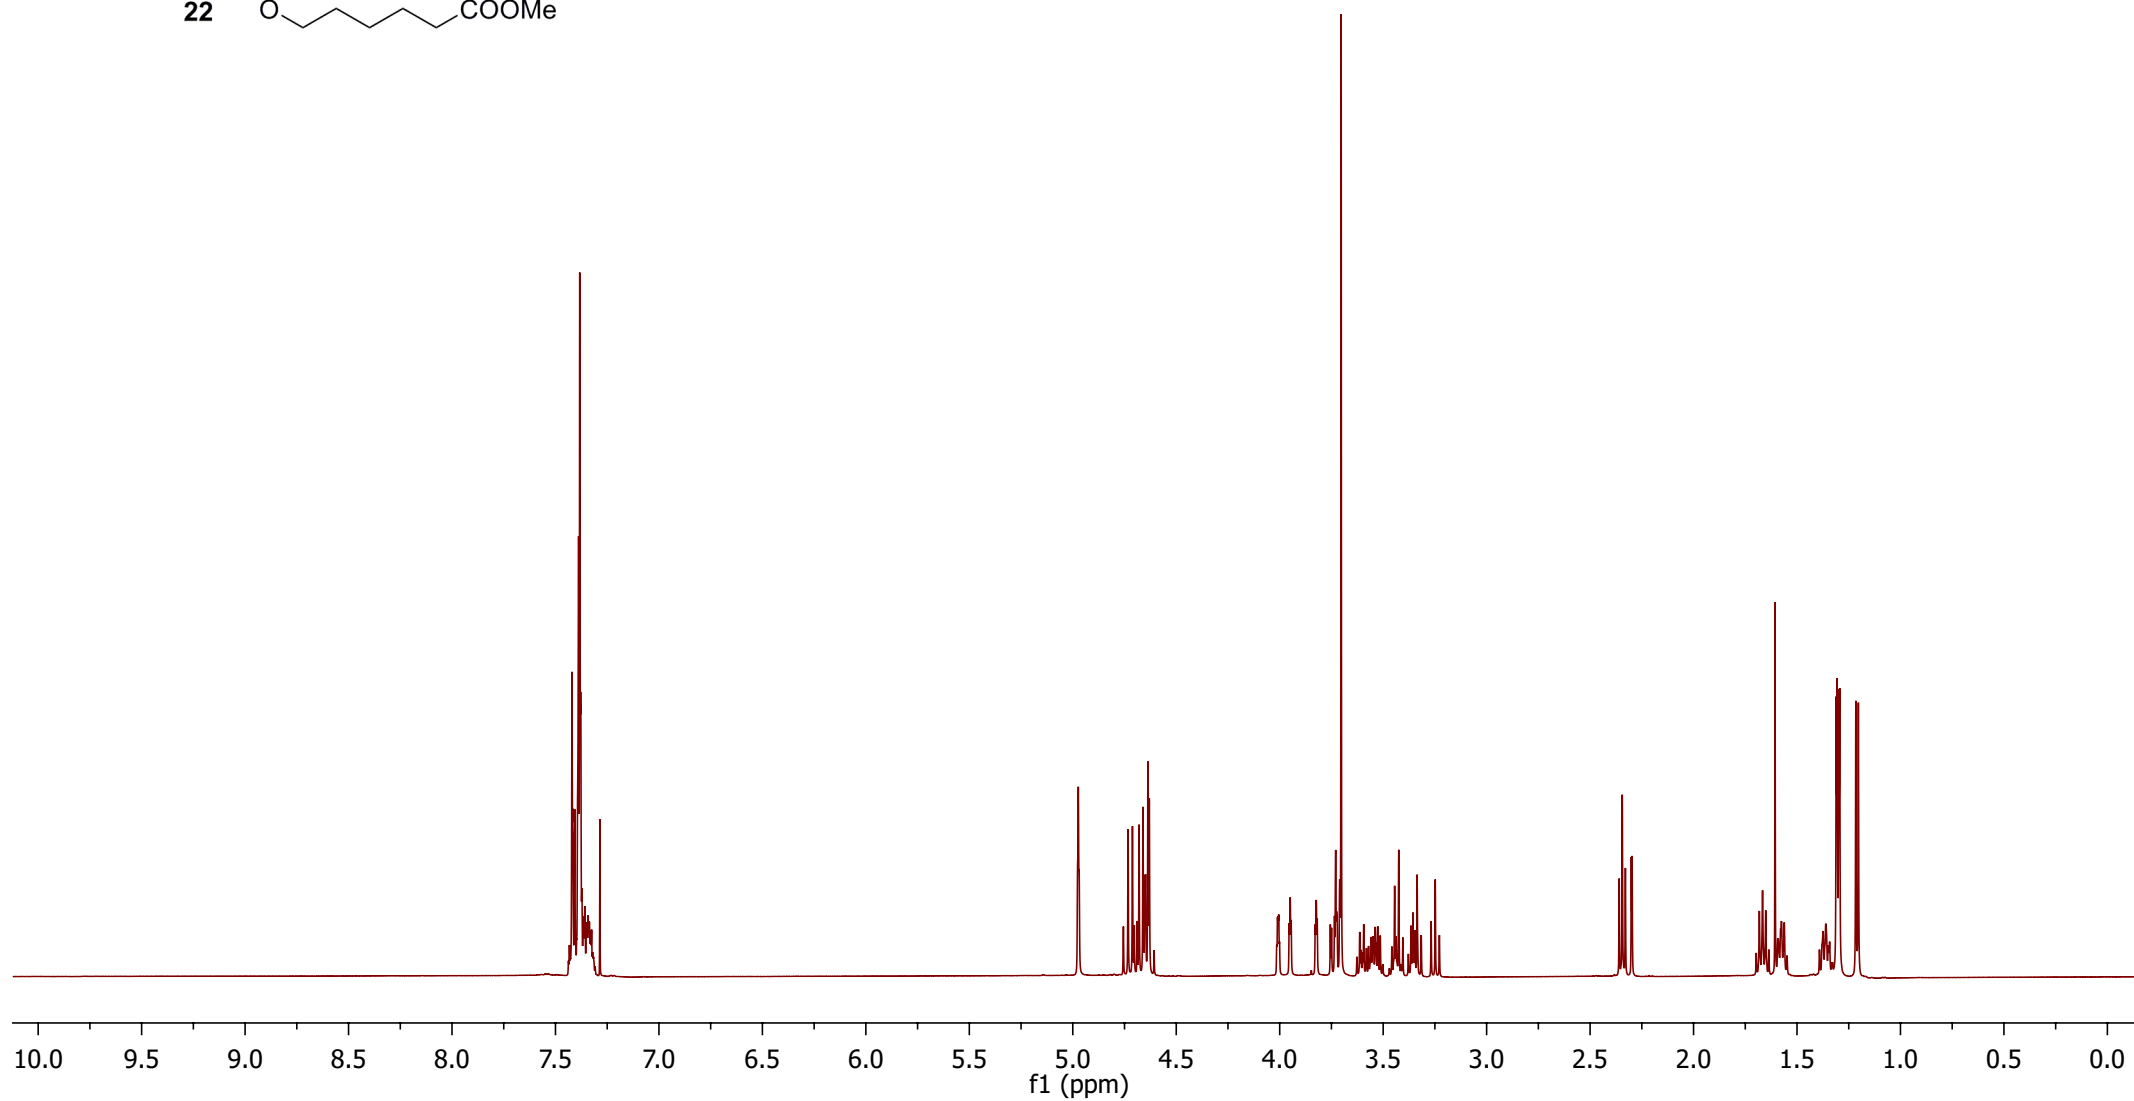

126 MHz, CDCl<sub>3</sub>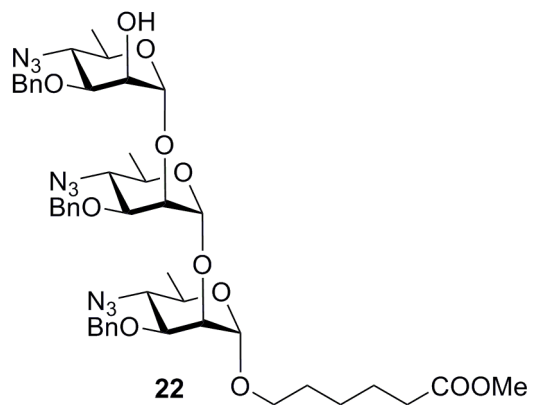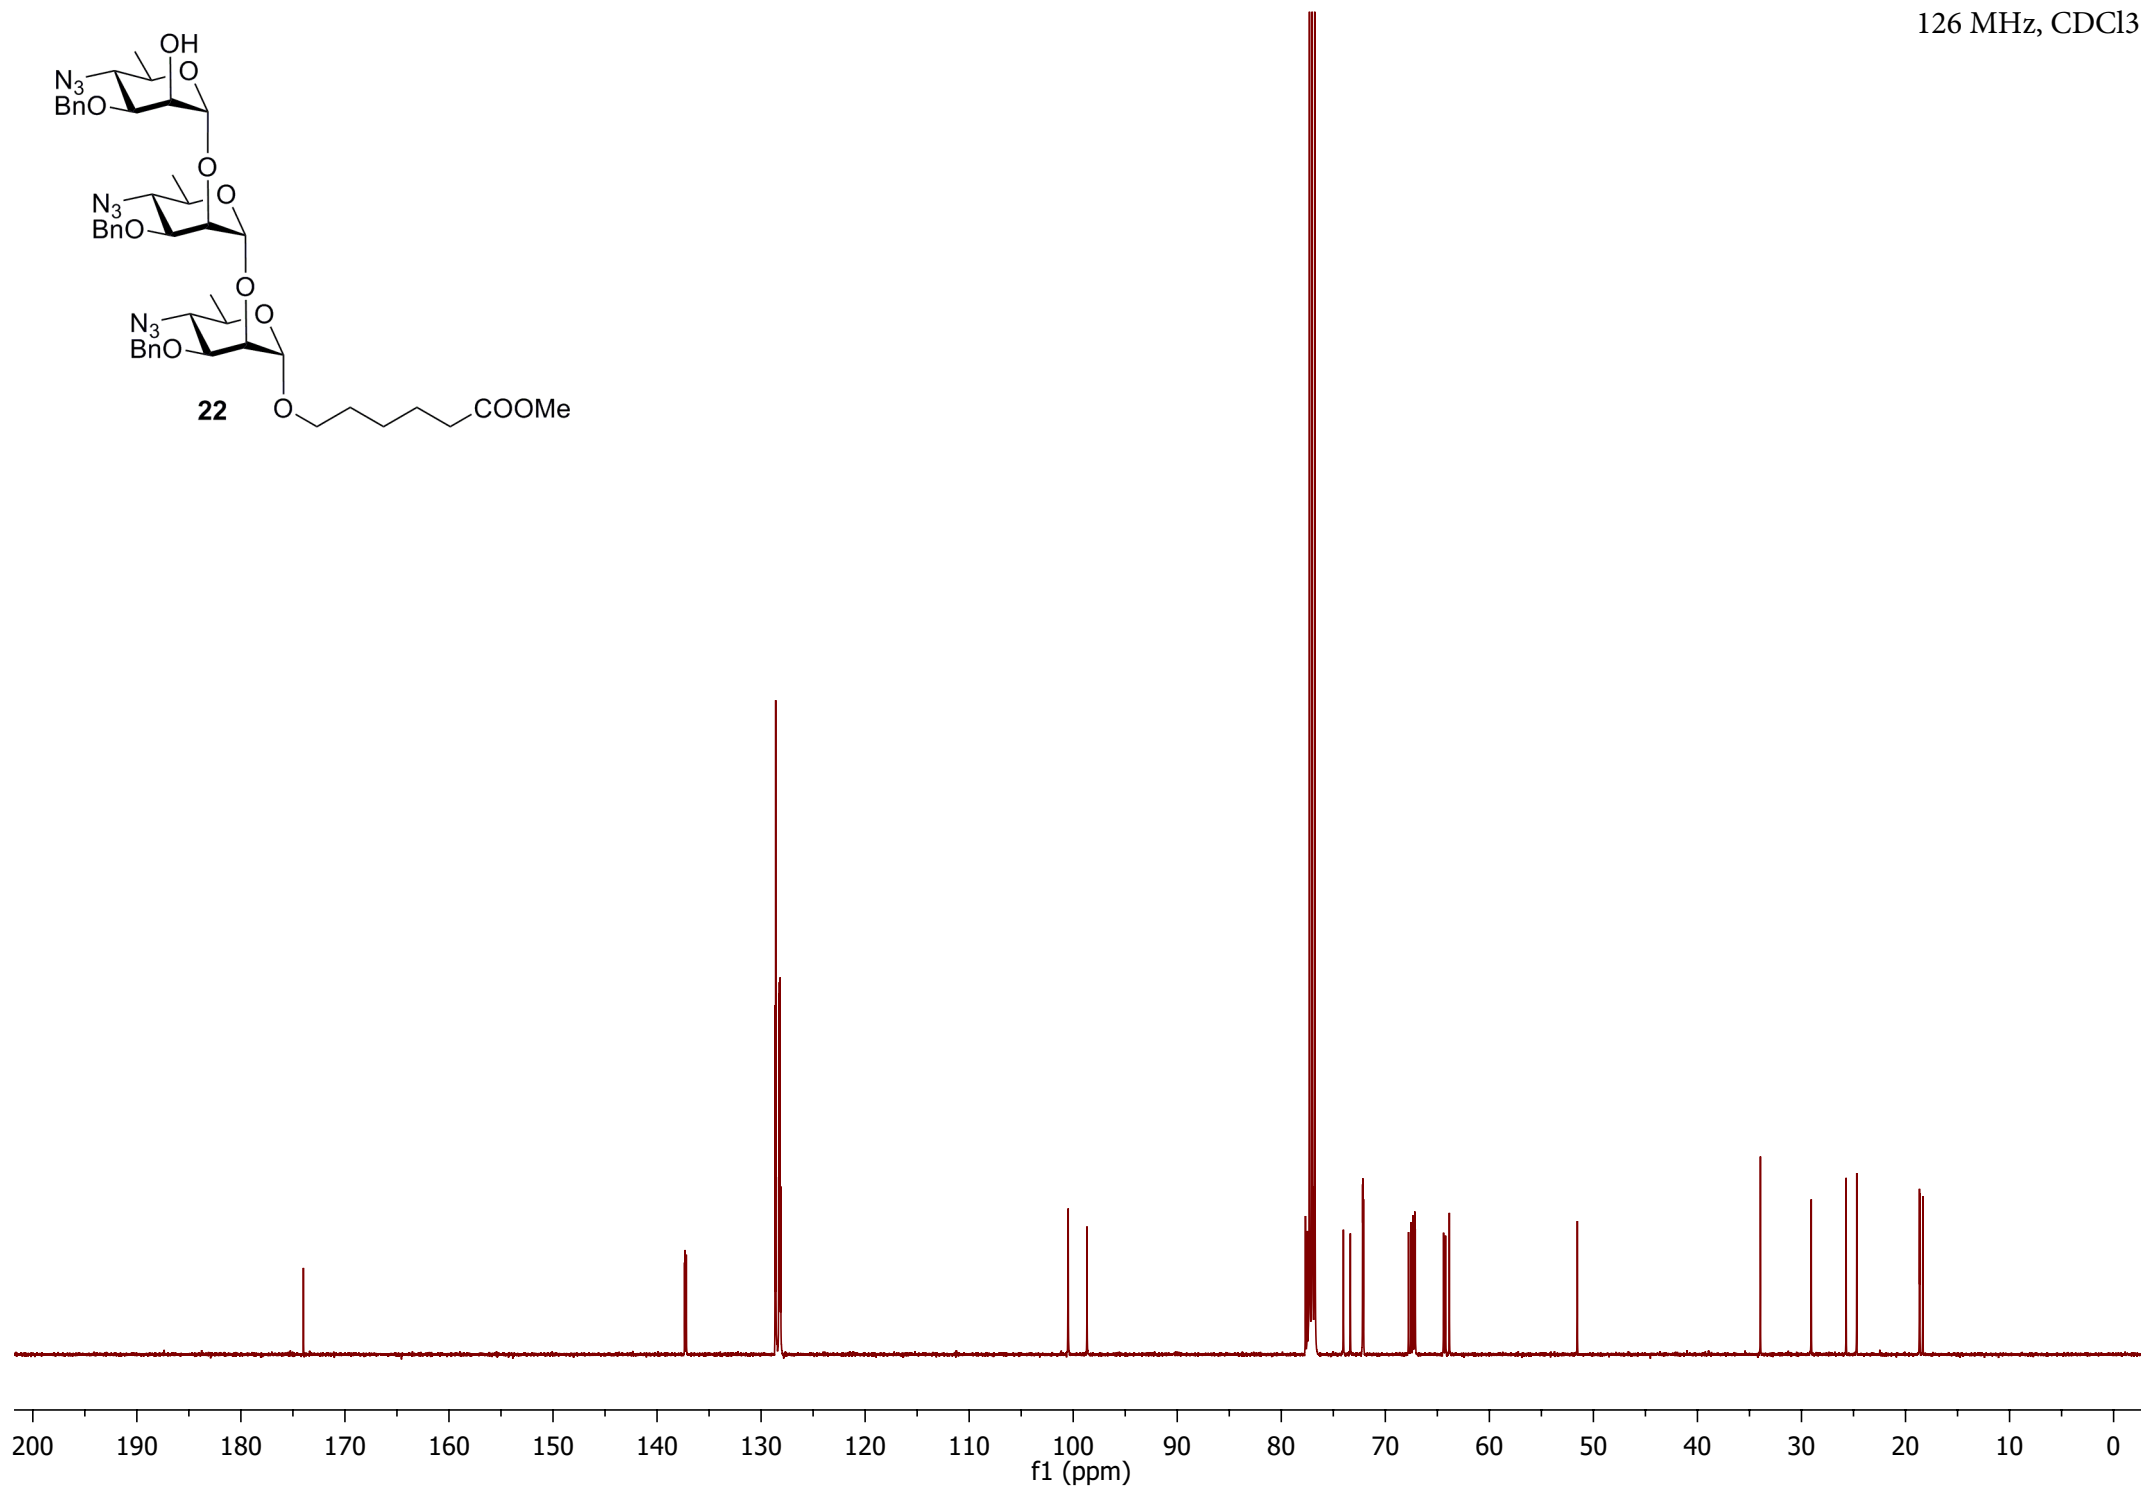

500 MHz, CDCl<sub>3</sub>

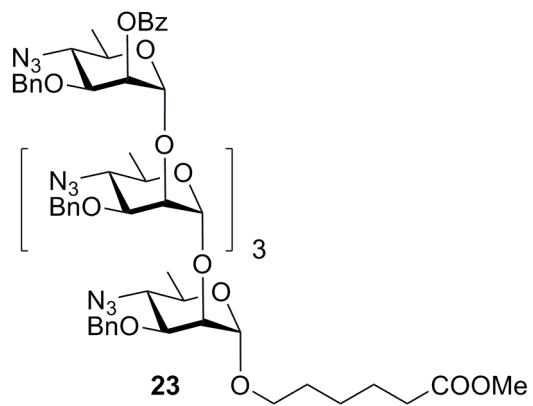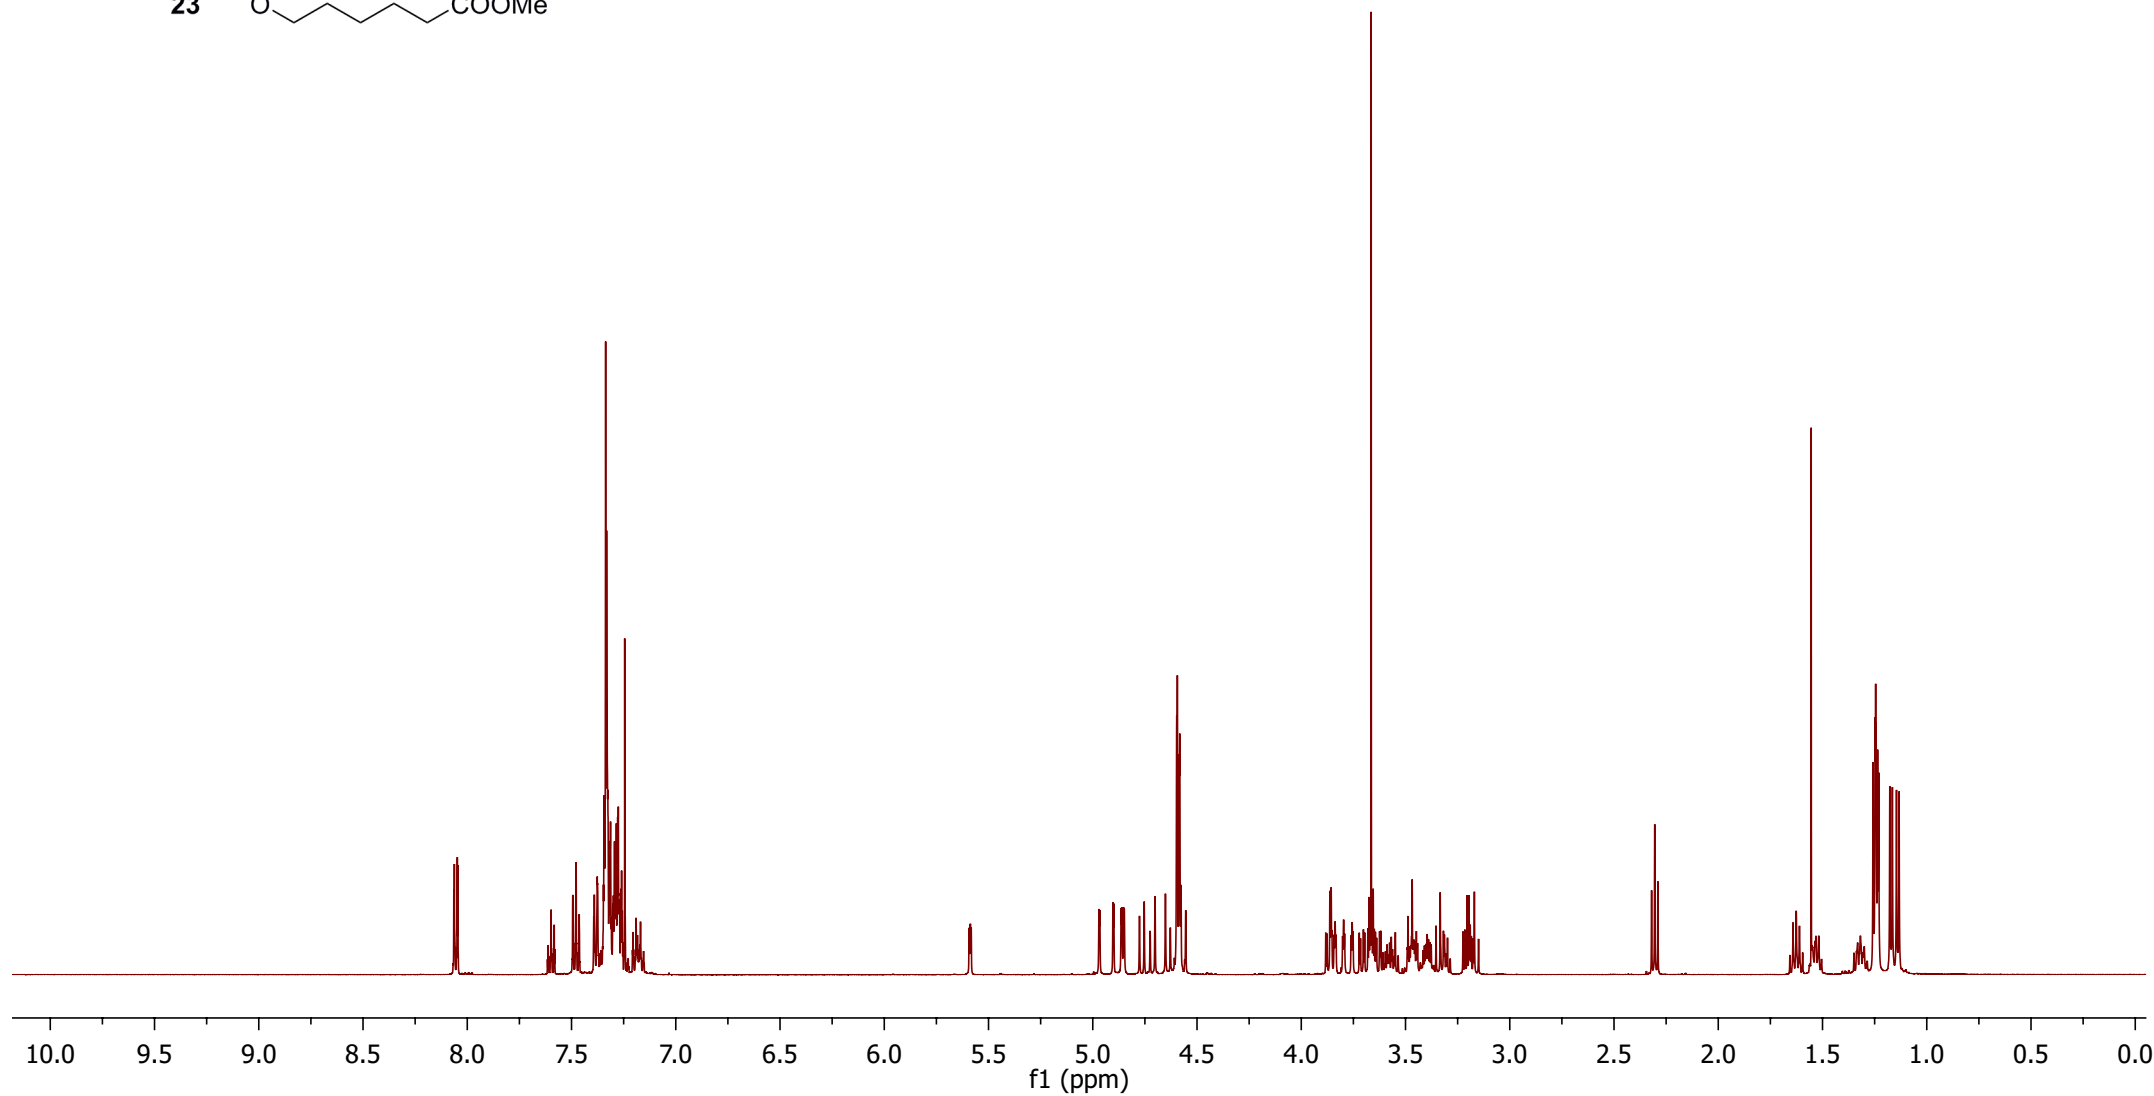

126 MHz, CDCl<sub>3</sub>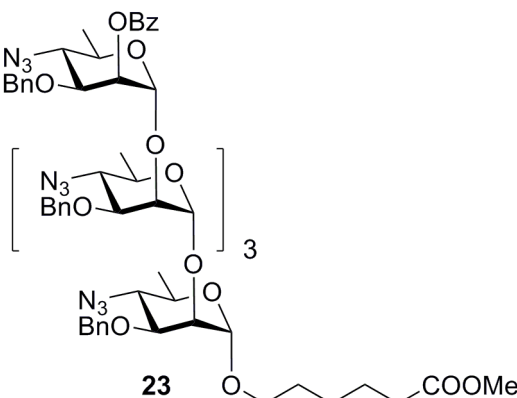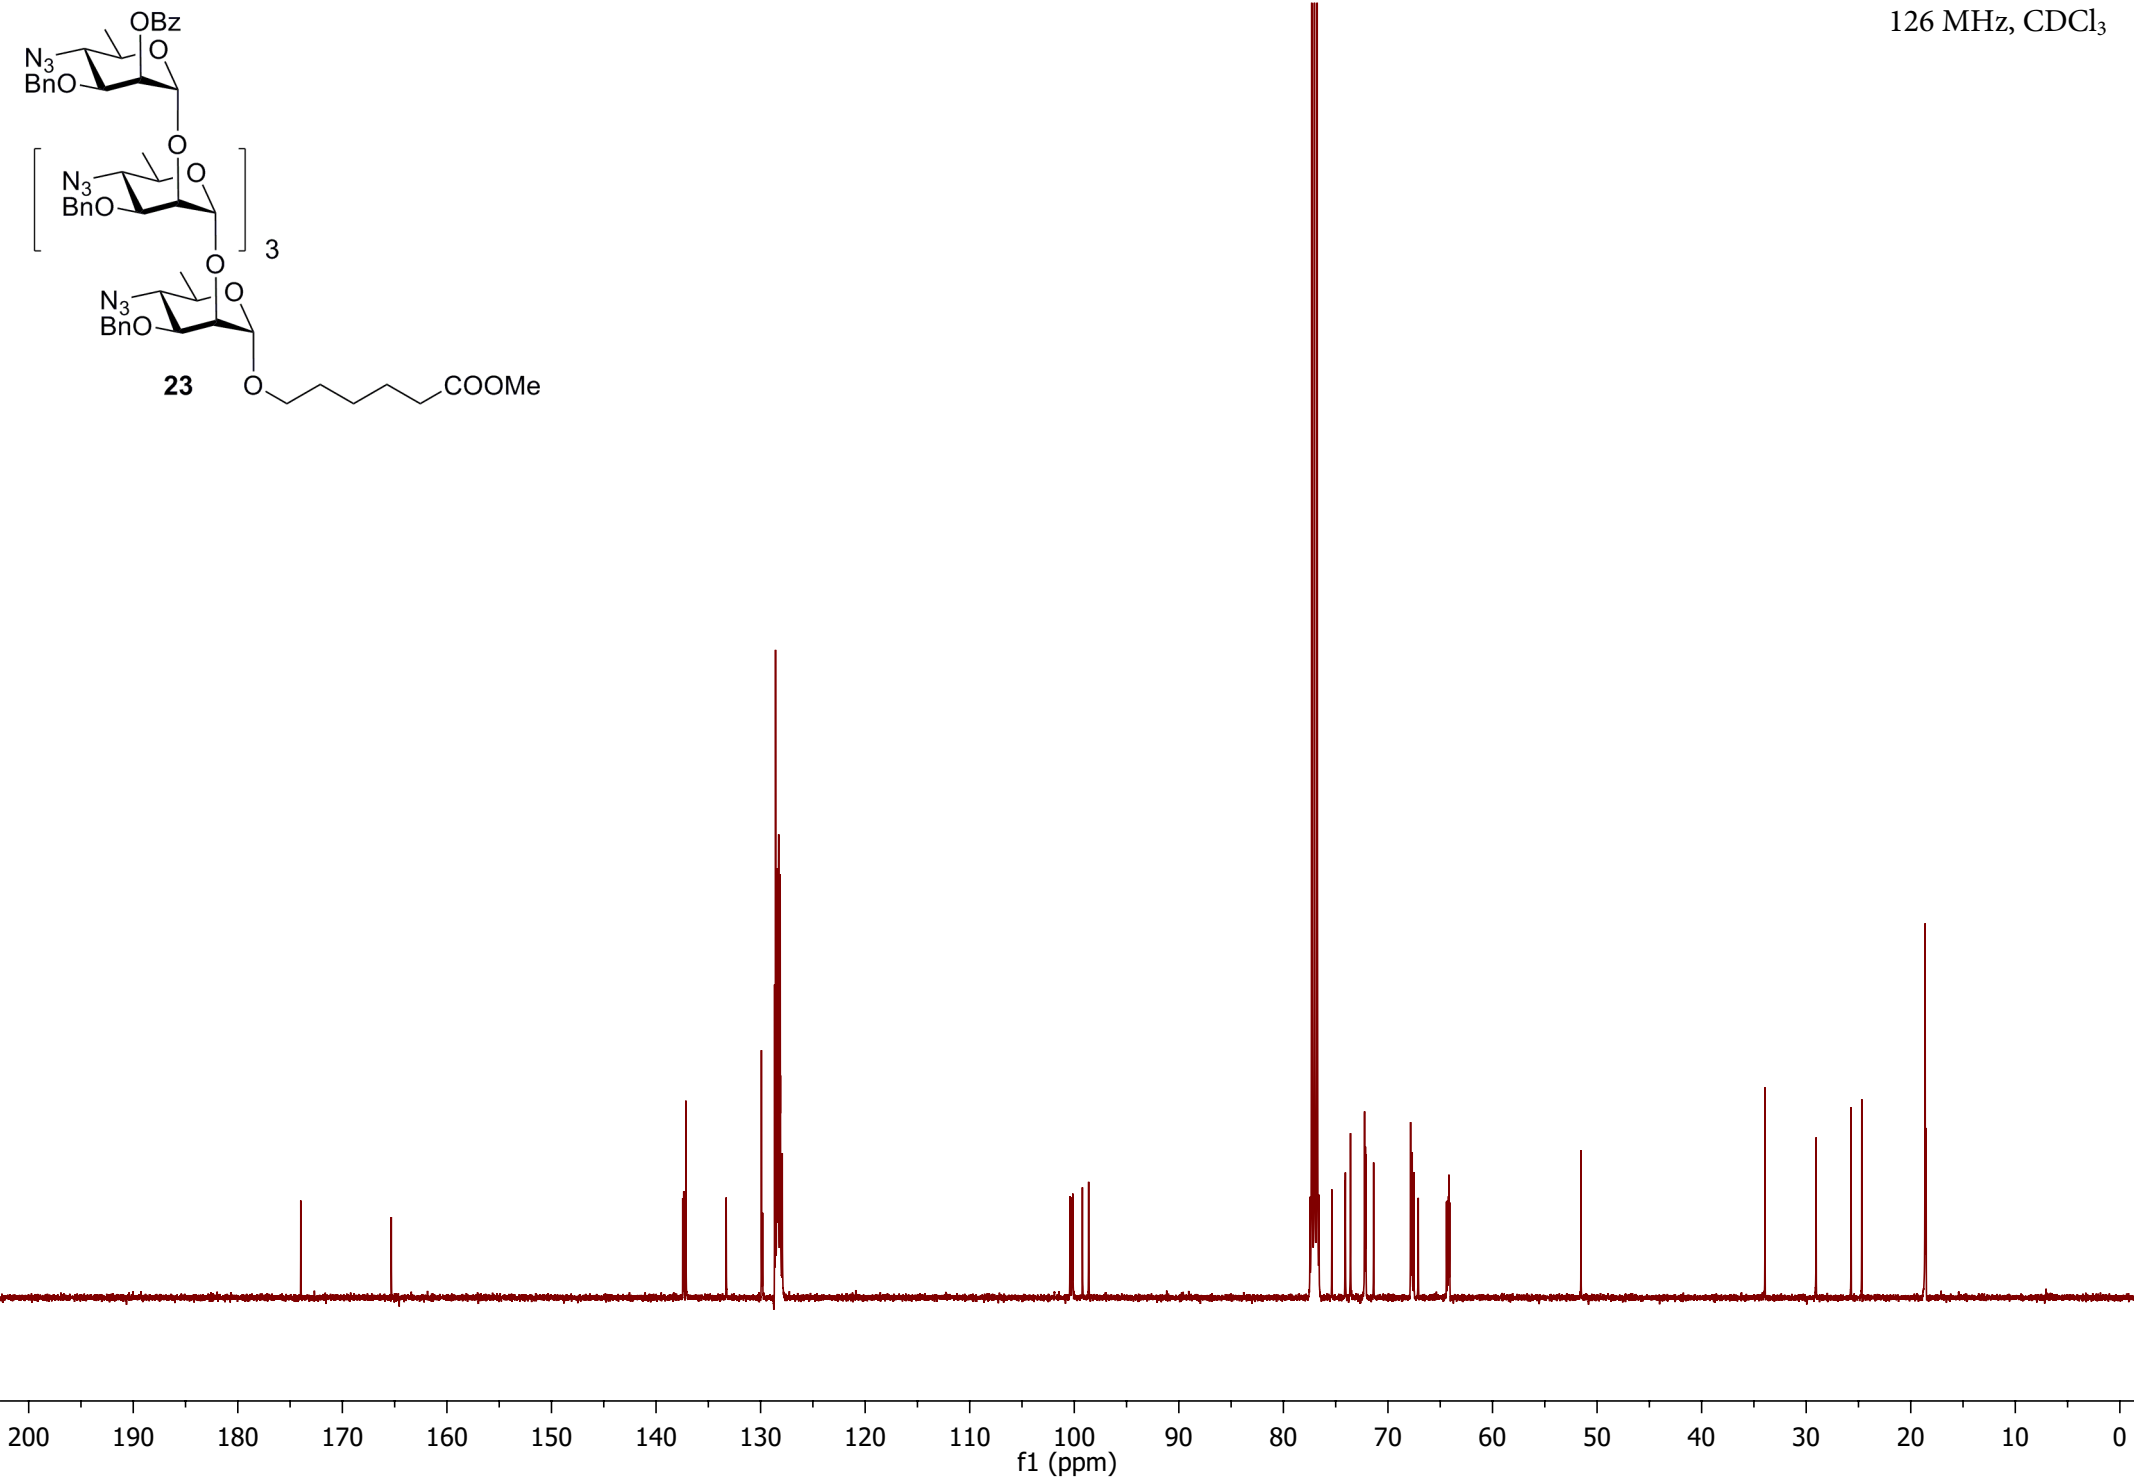

500 MHz, CDCl<sub>3</sub>

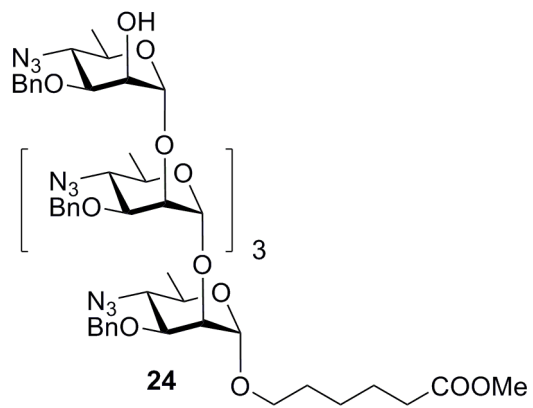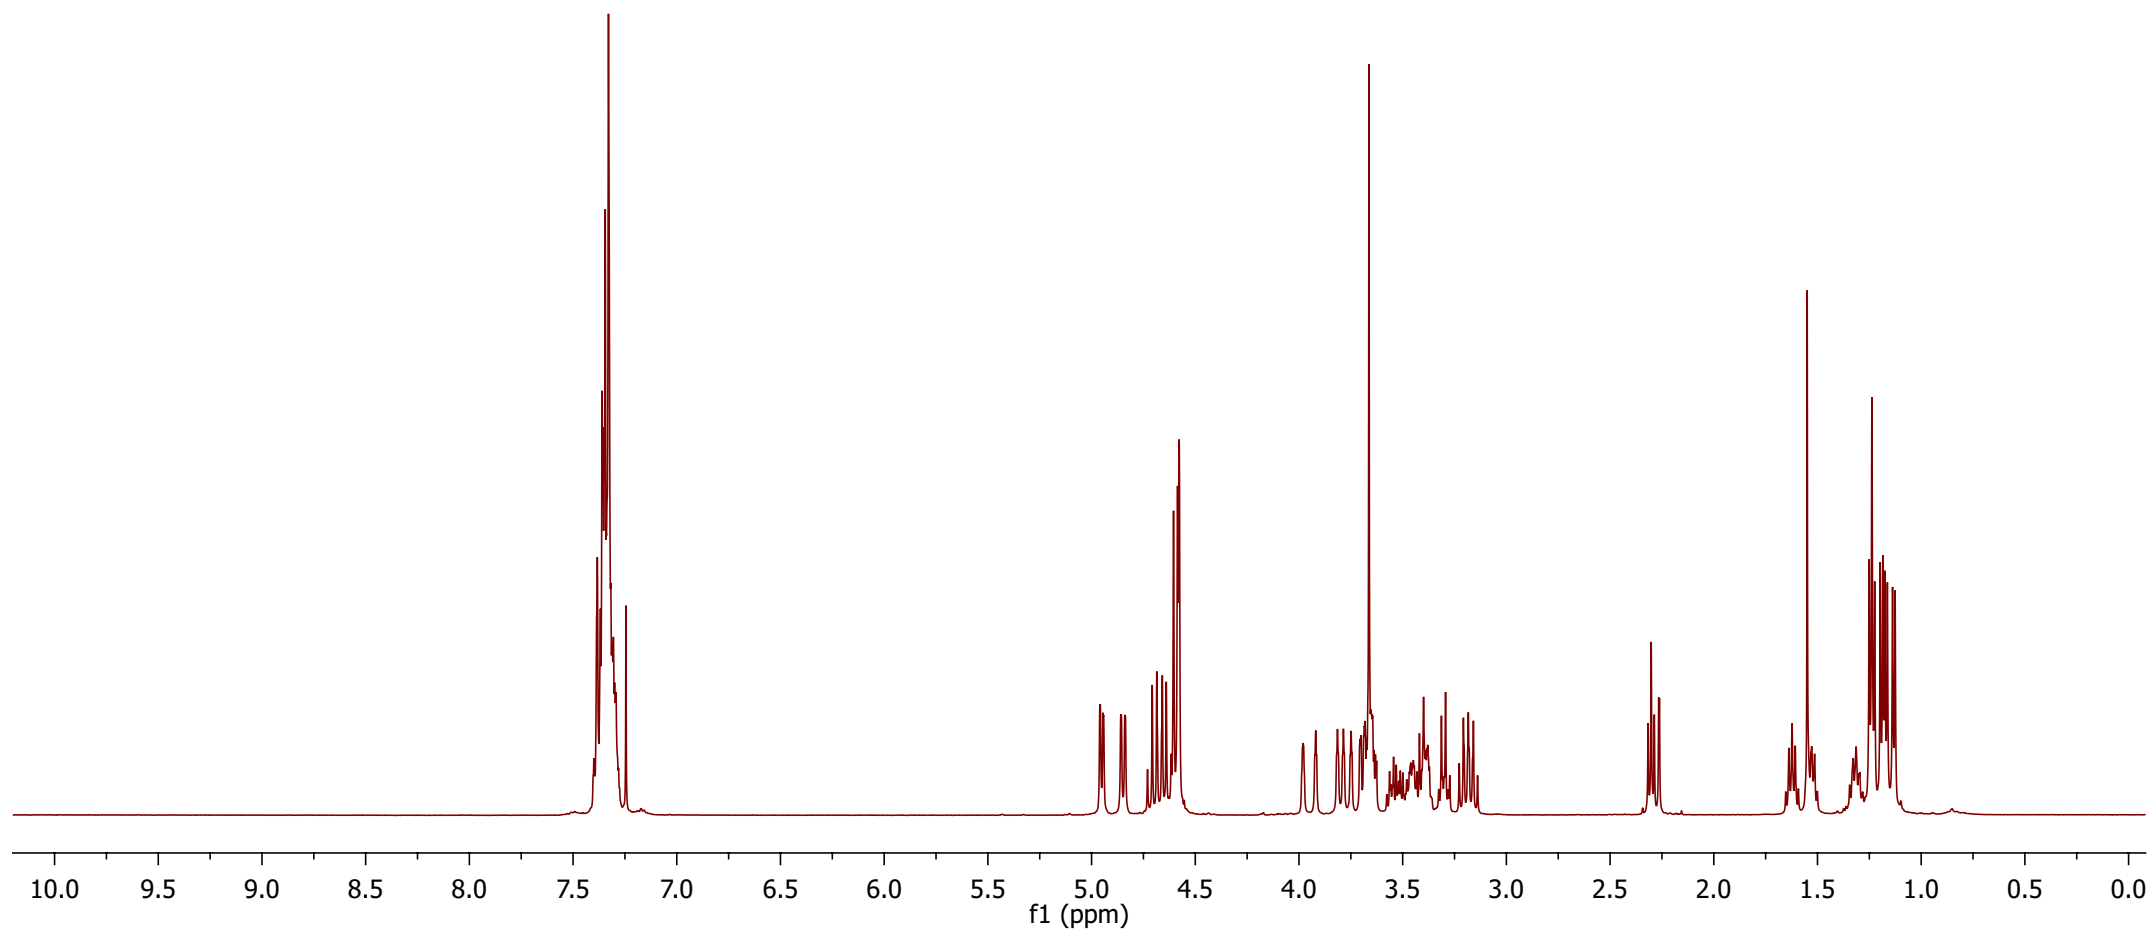

126 MHz, CDCl<sub>3</sub>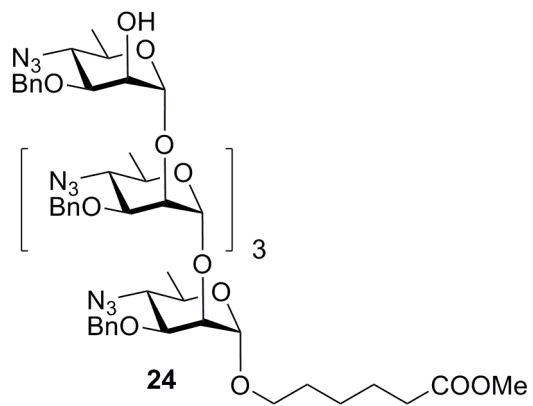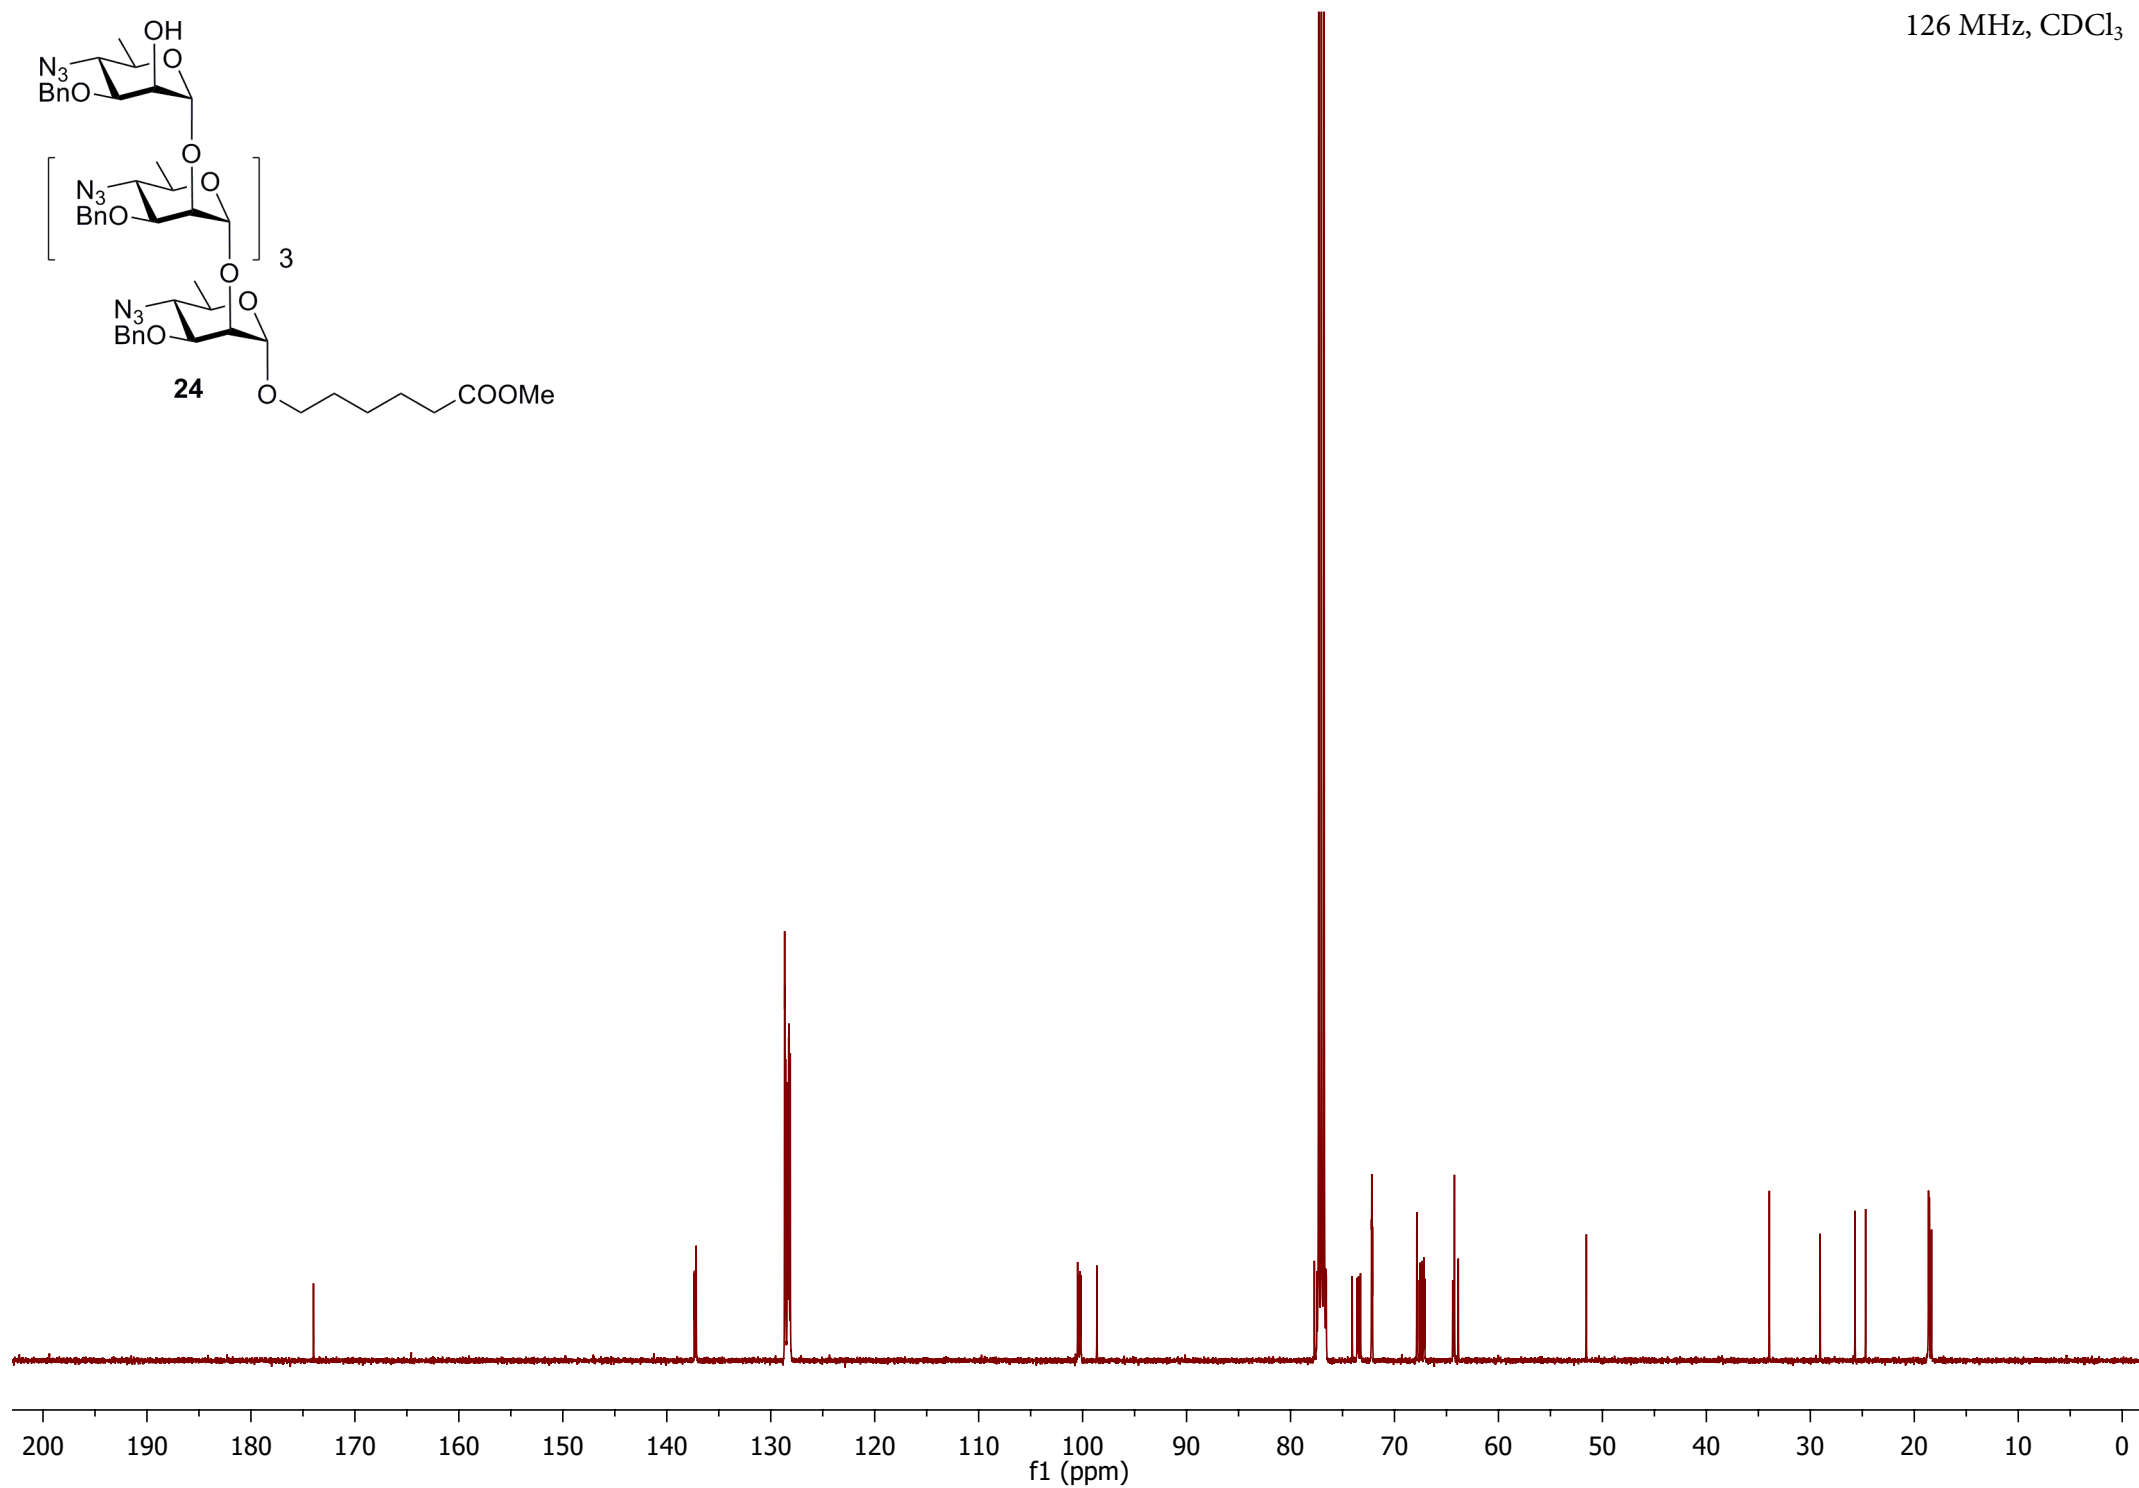

500 MHz, CDCl<sub>3</sub>

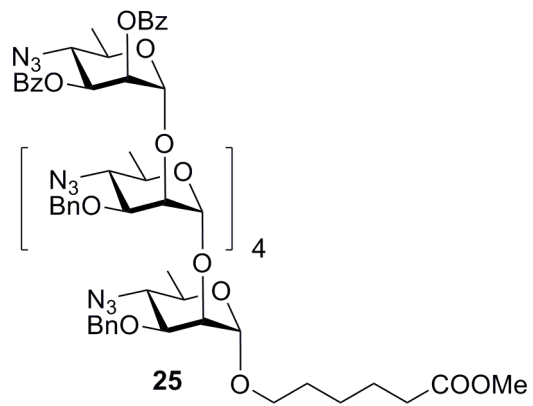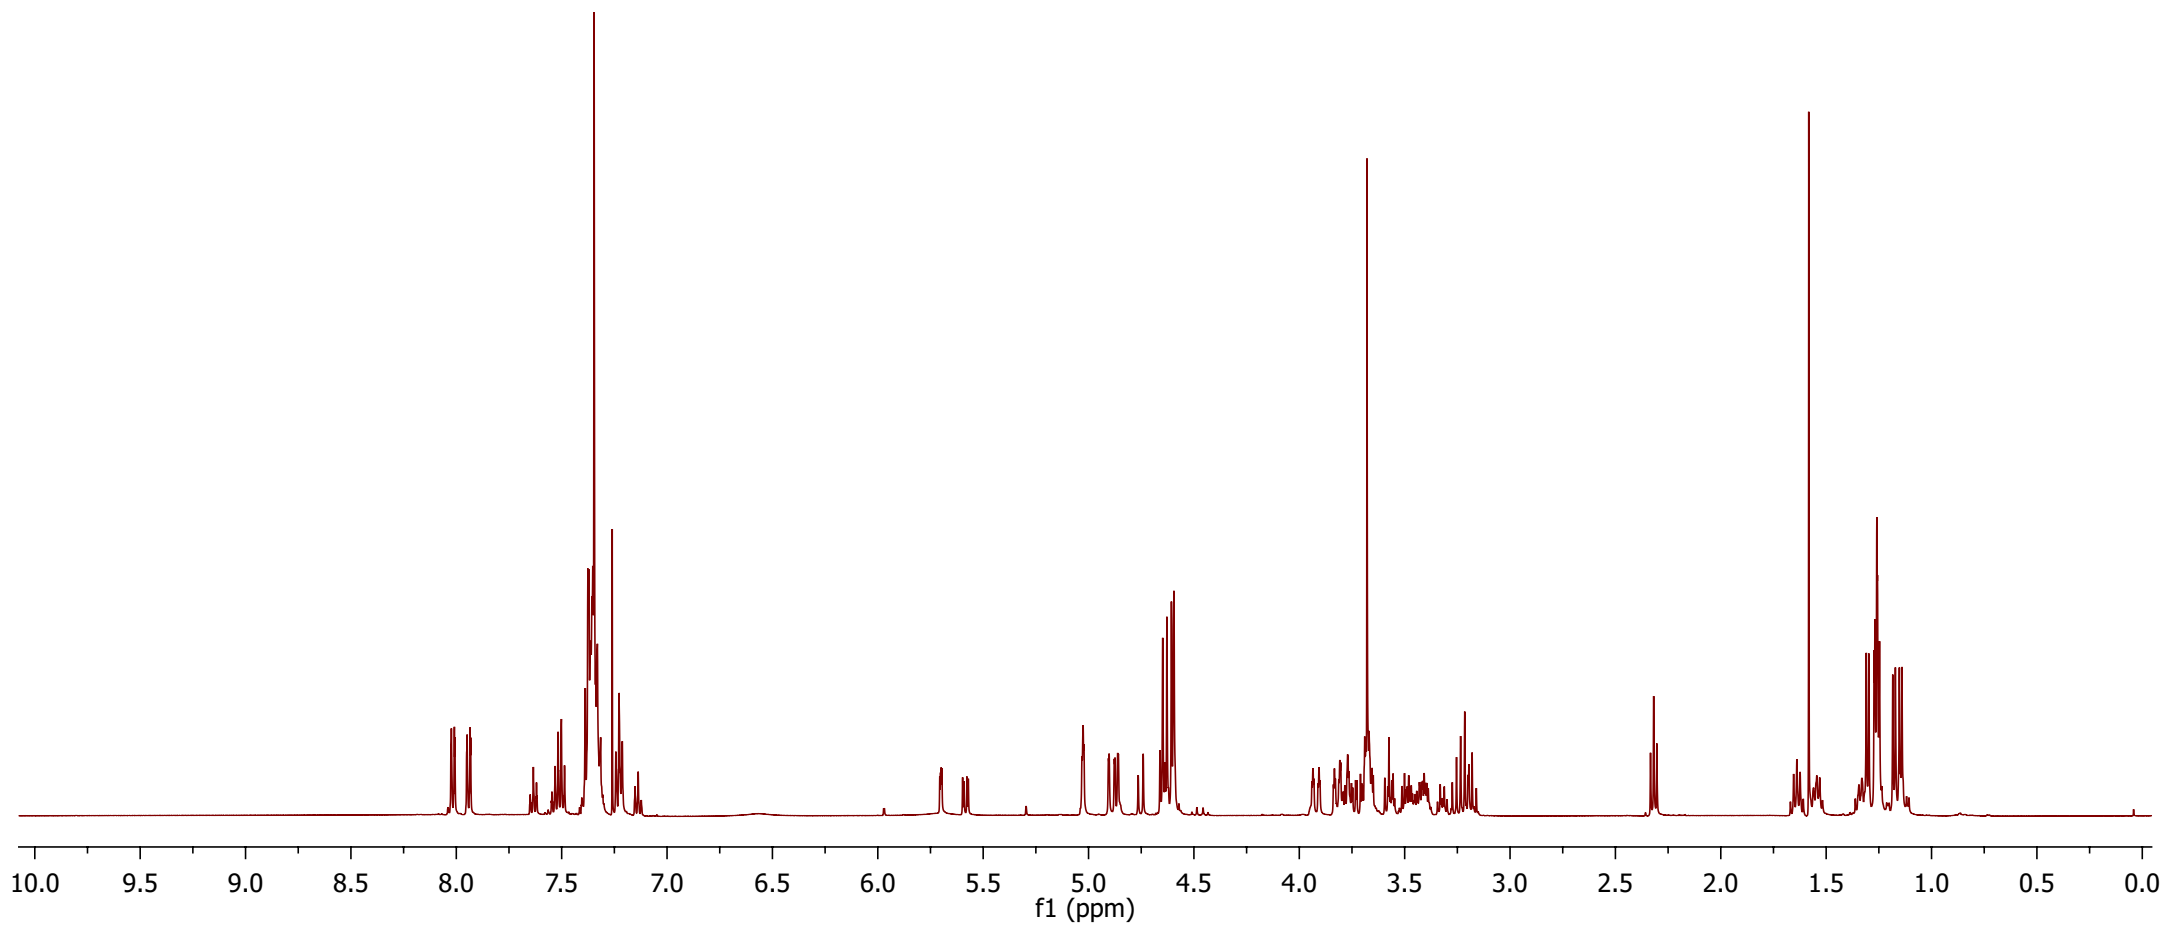

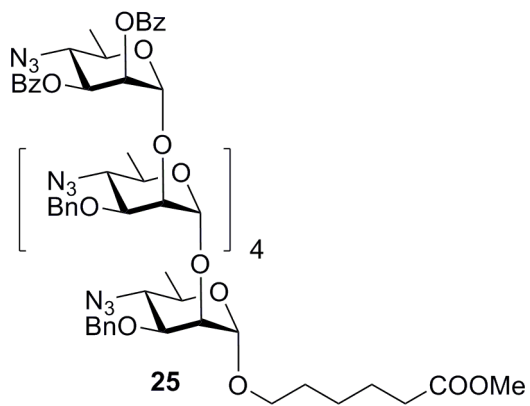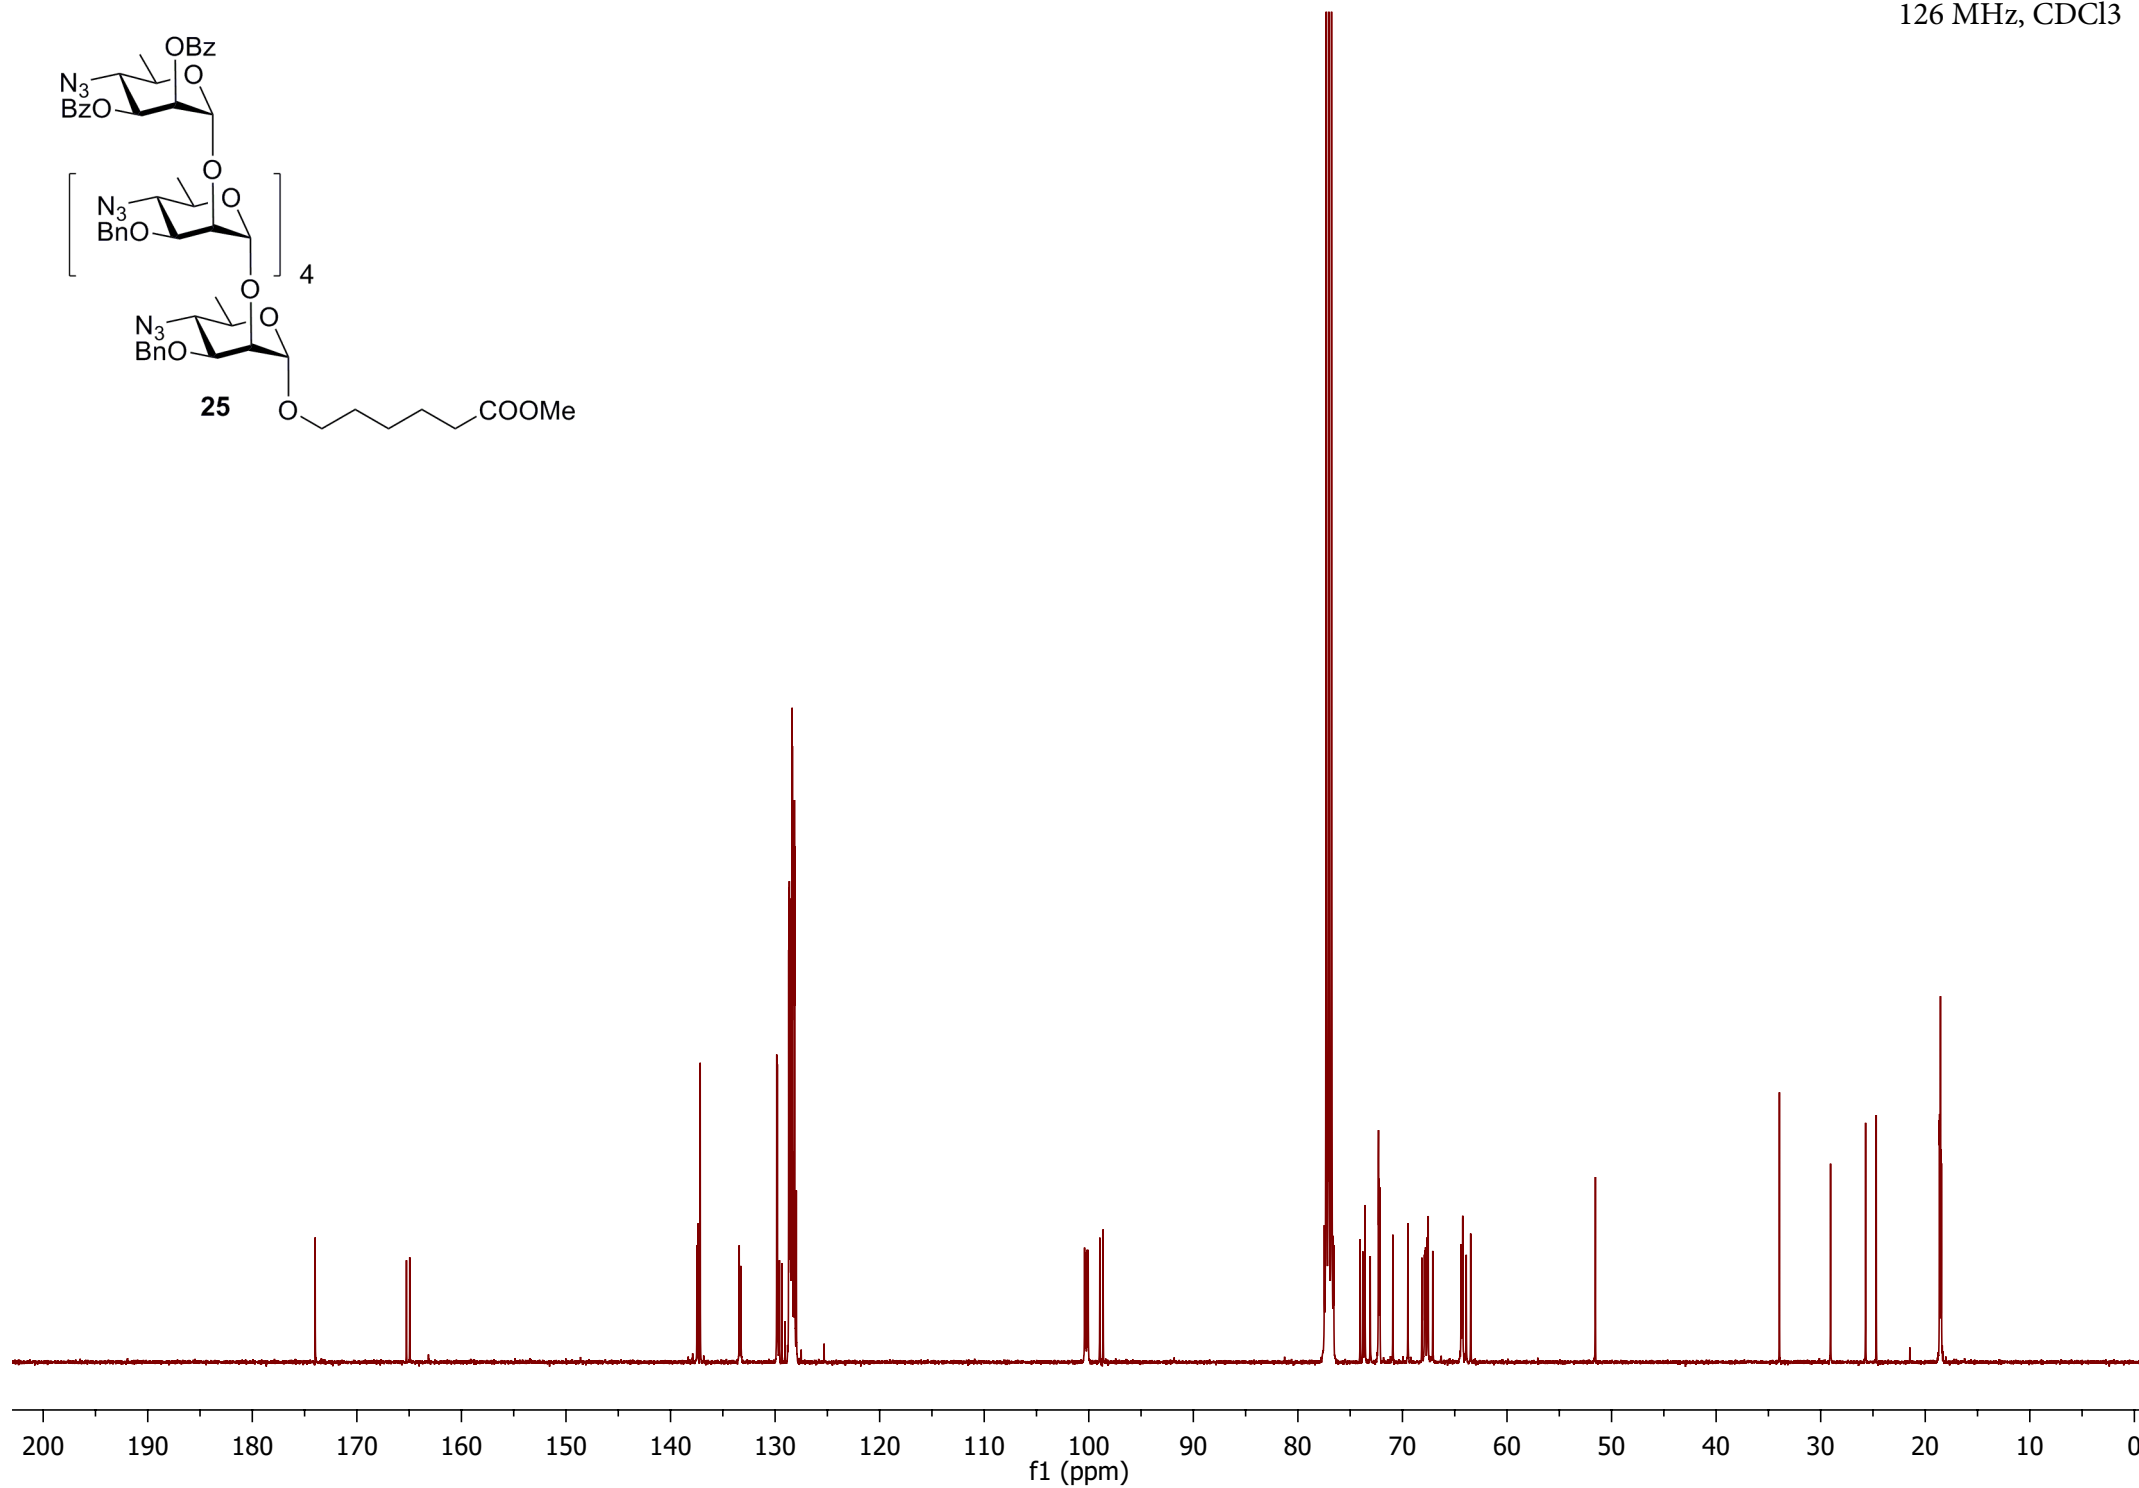



500 MHz, CDCl<sub>3</sub>

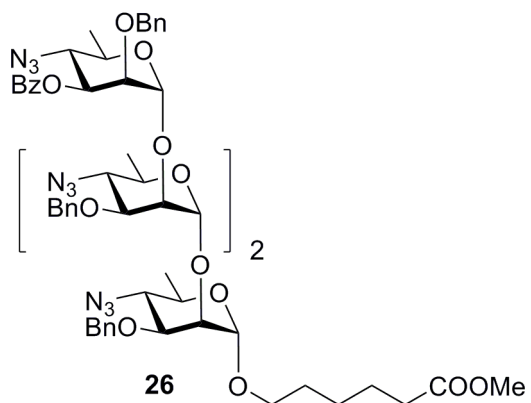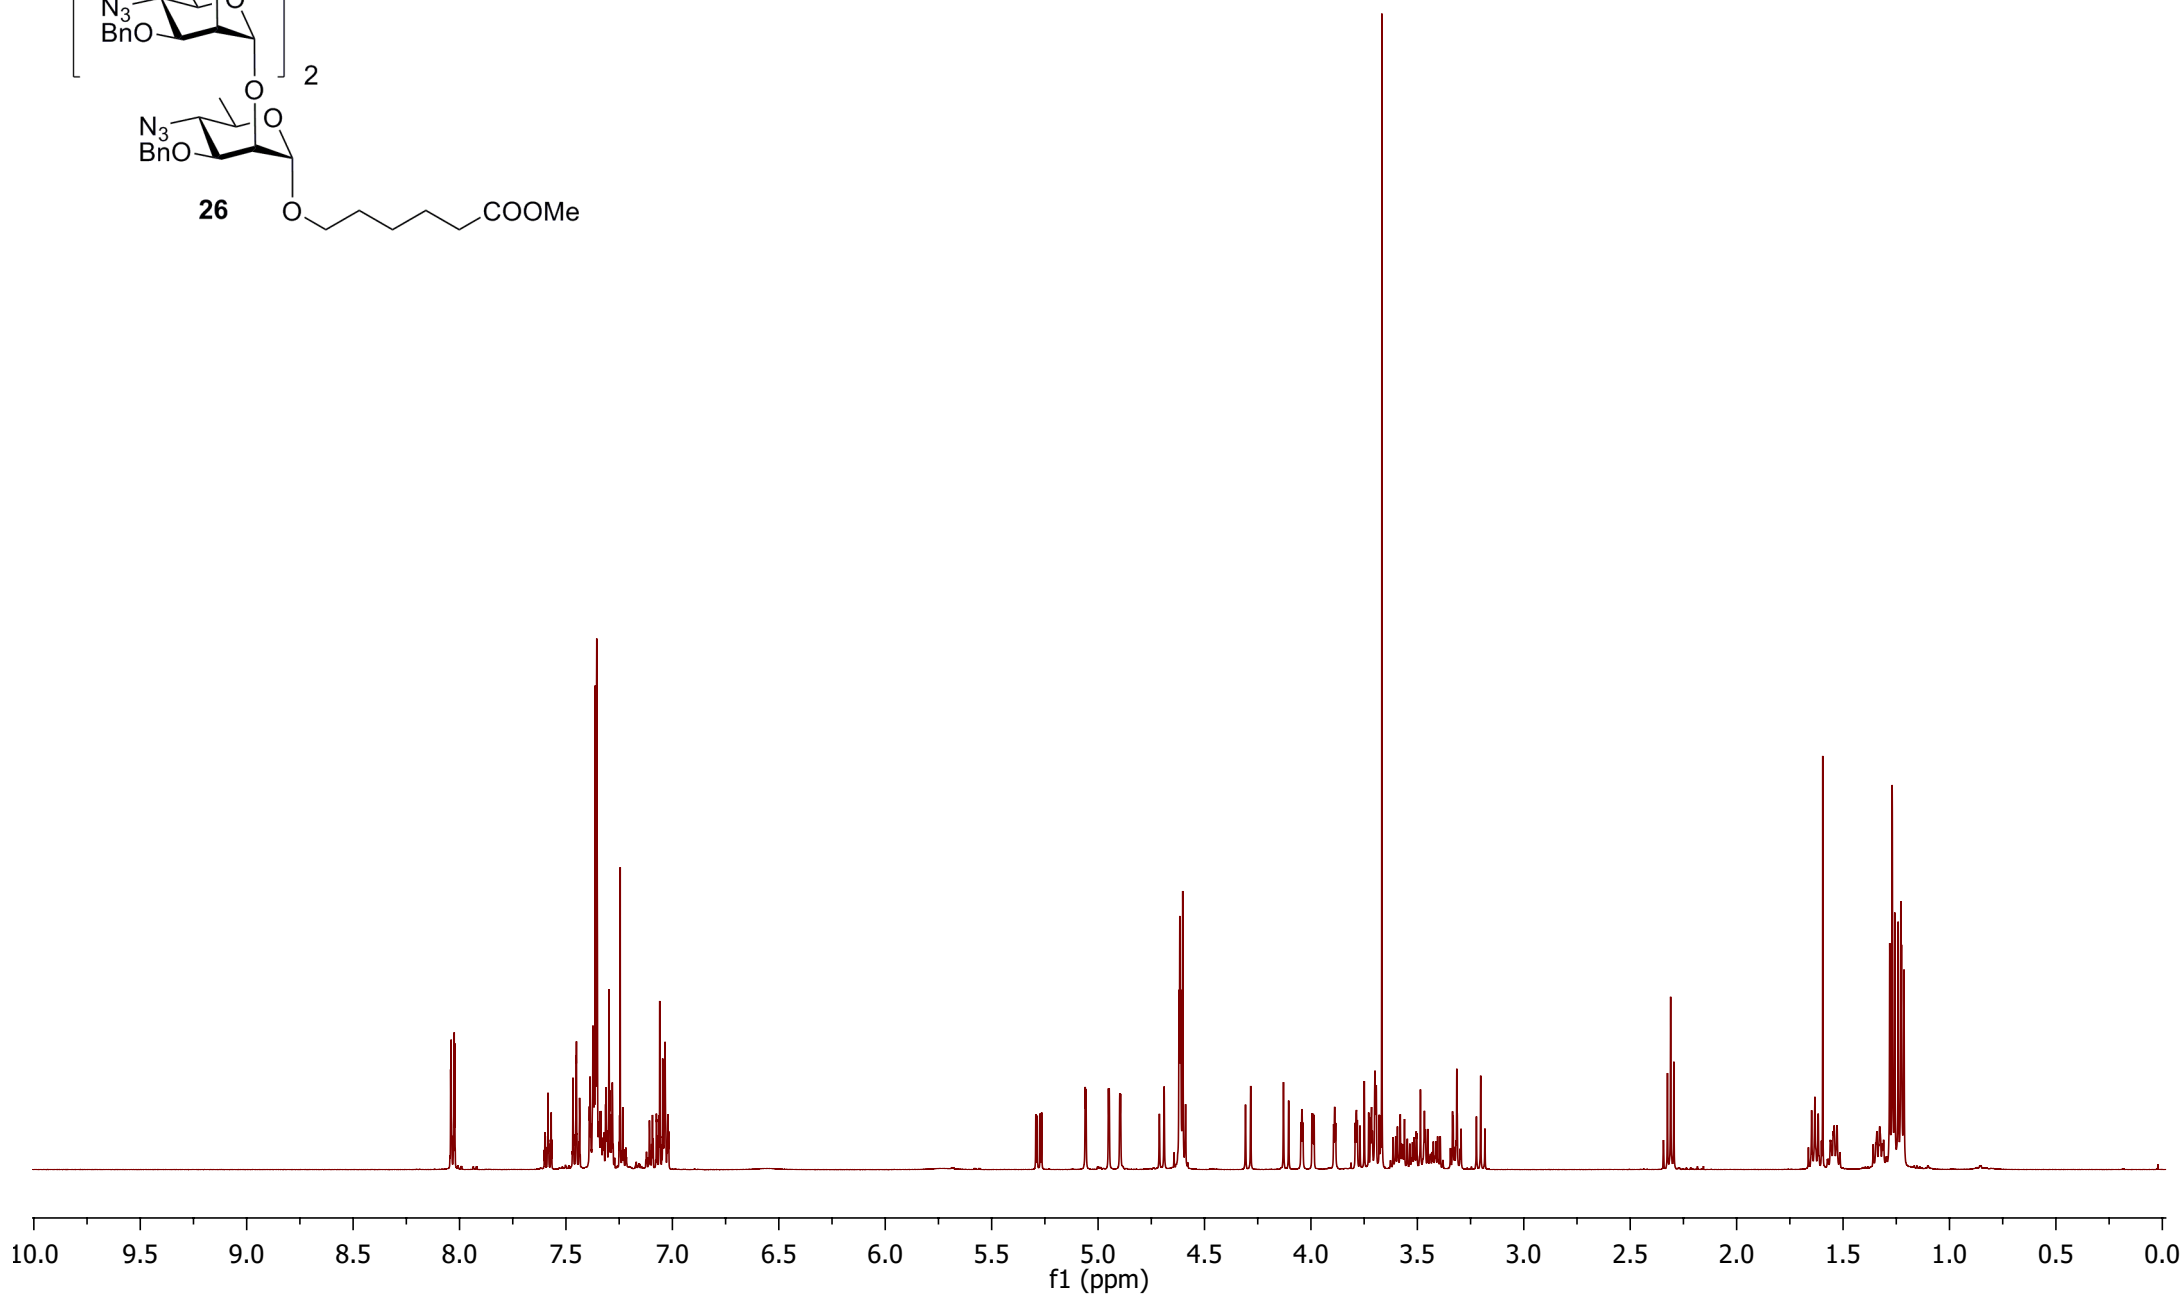

126 MHz, CDCl<sub>3</sub>

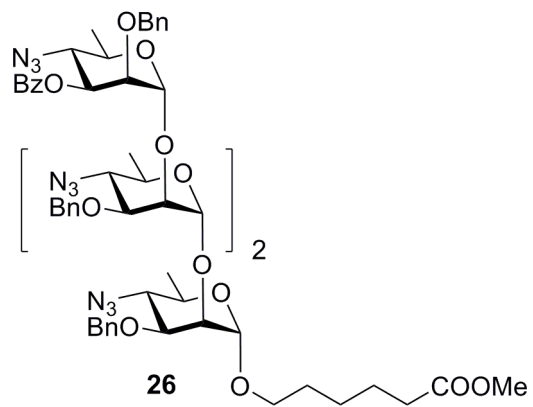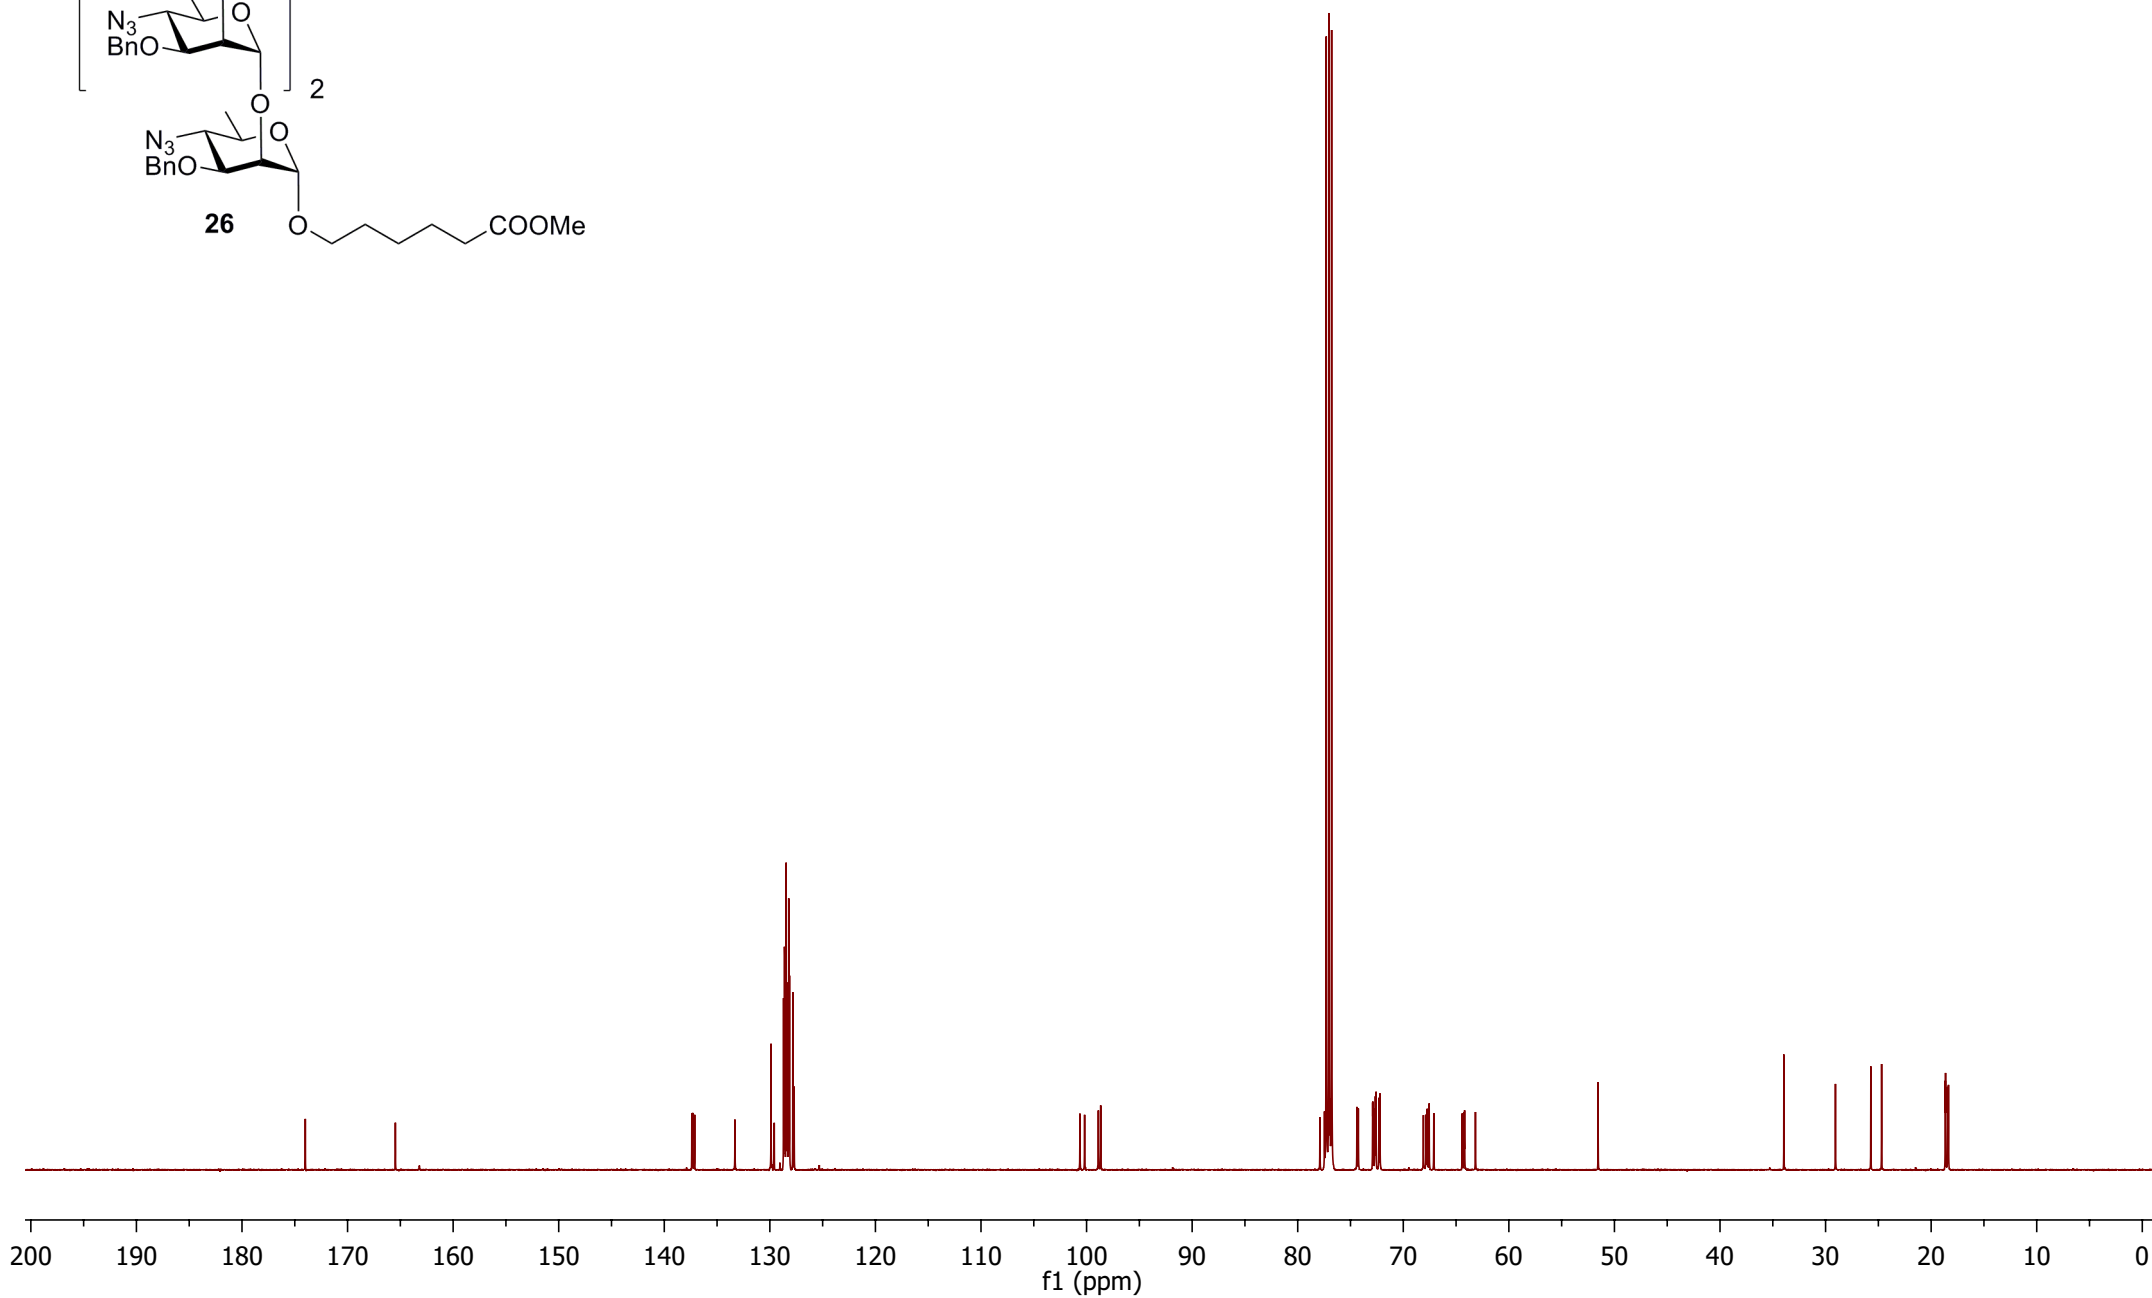

500 MHz, CDCl<sub>3</sub>

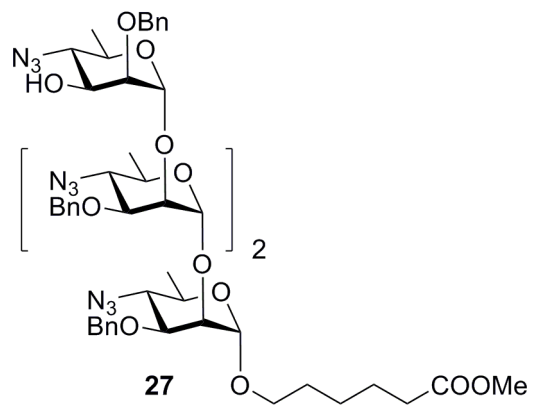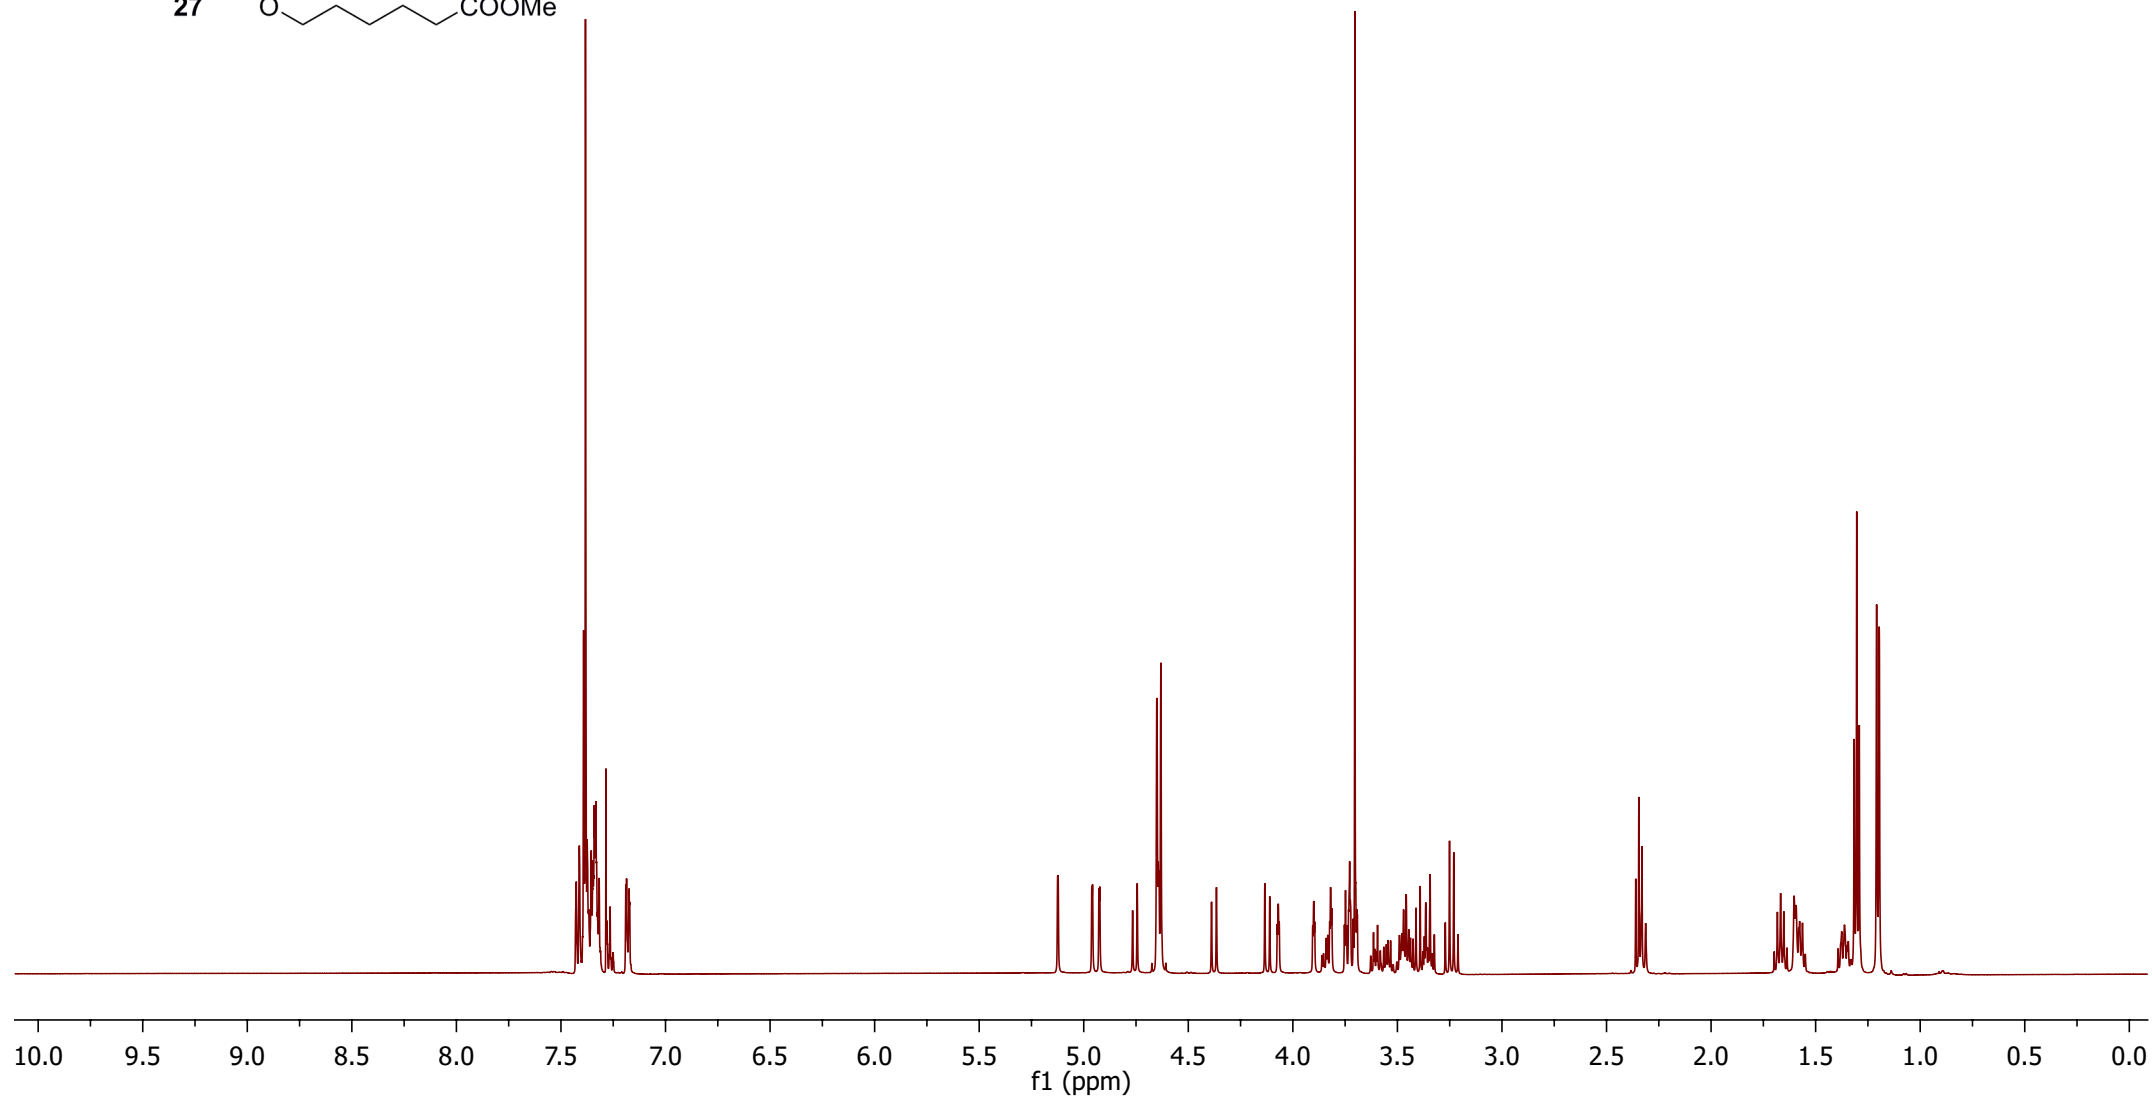

126 MHz, CDCl<sub>3</sub>

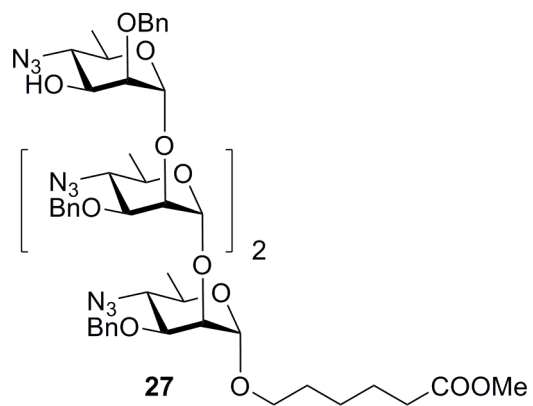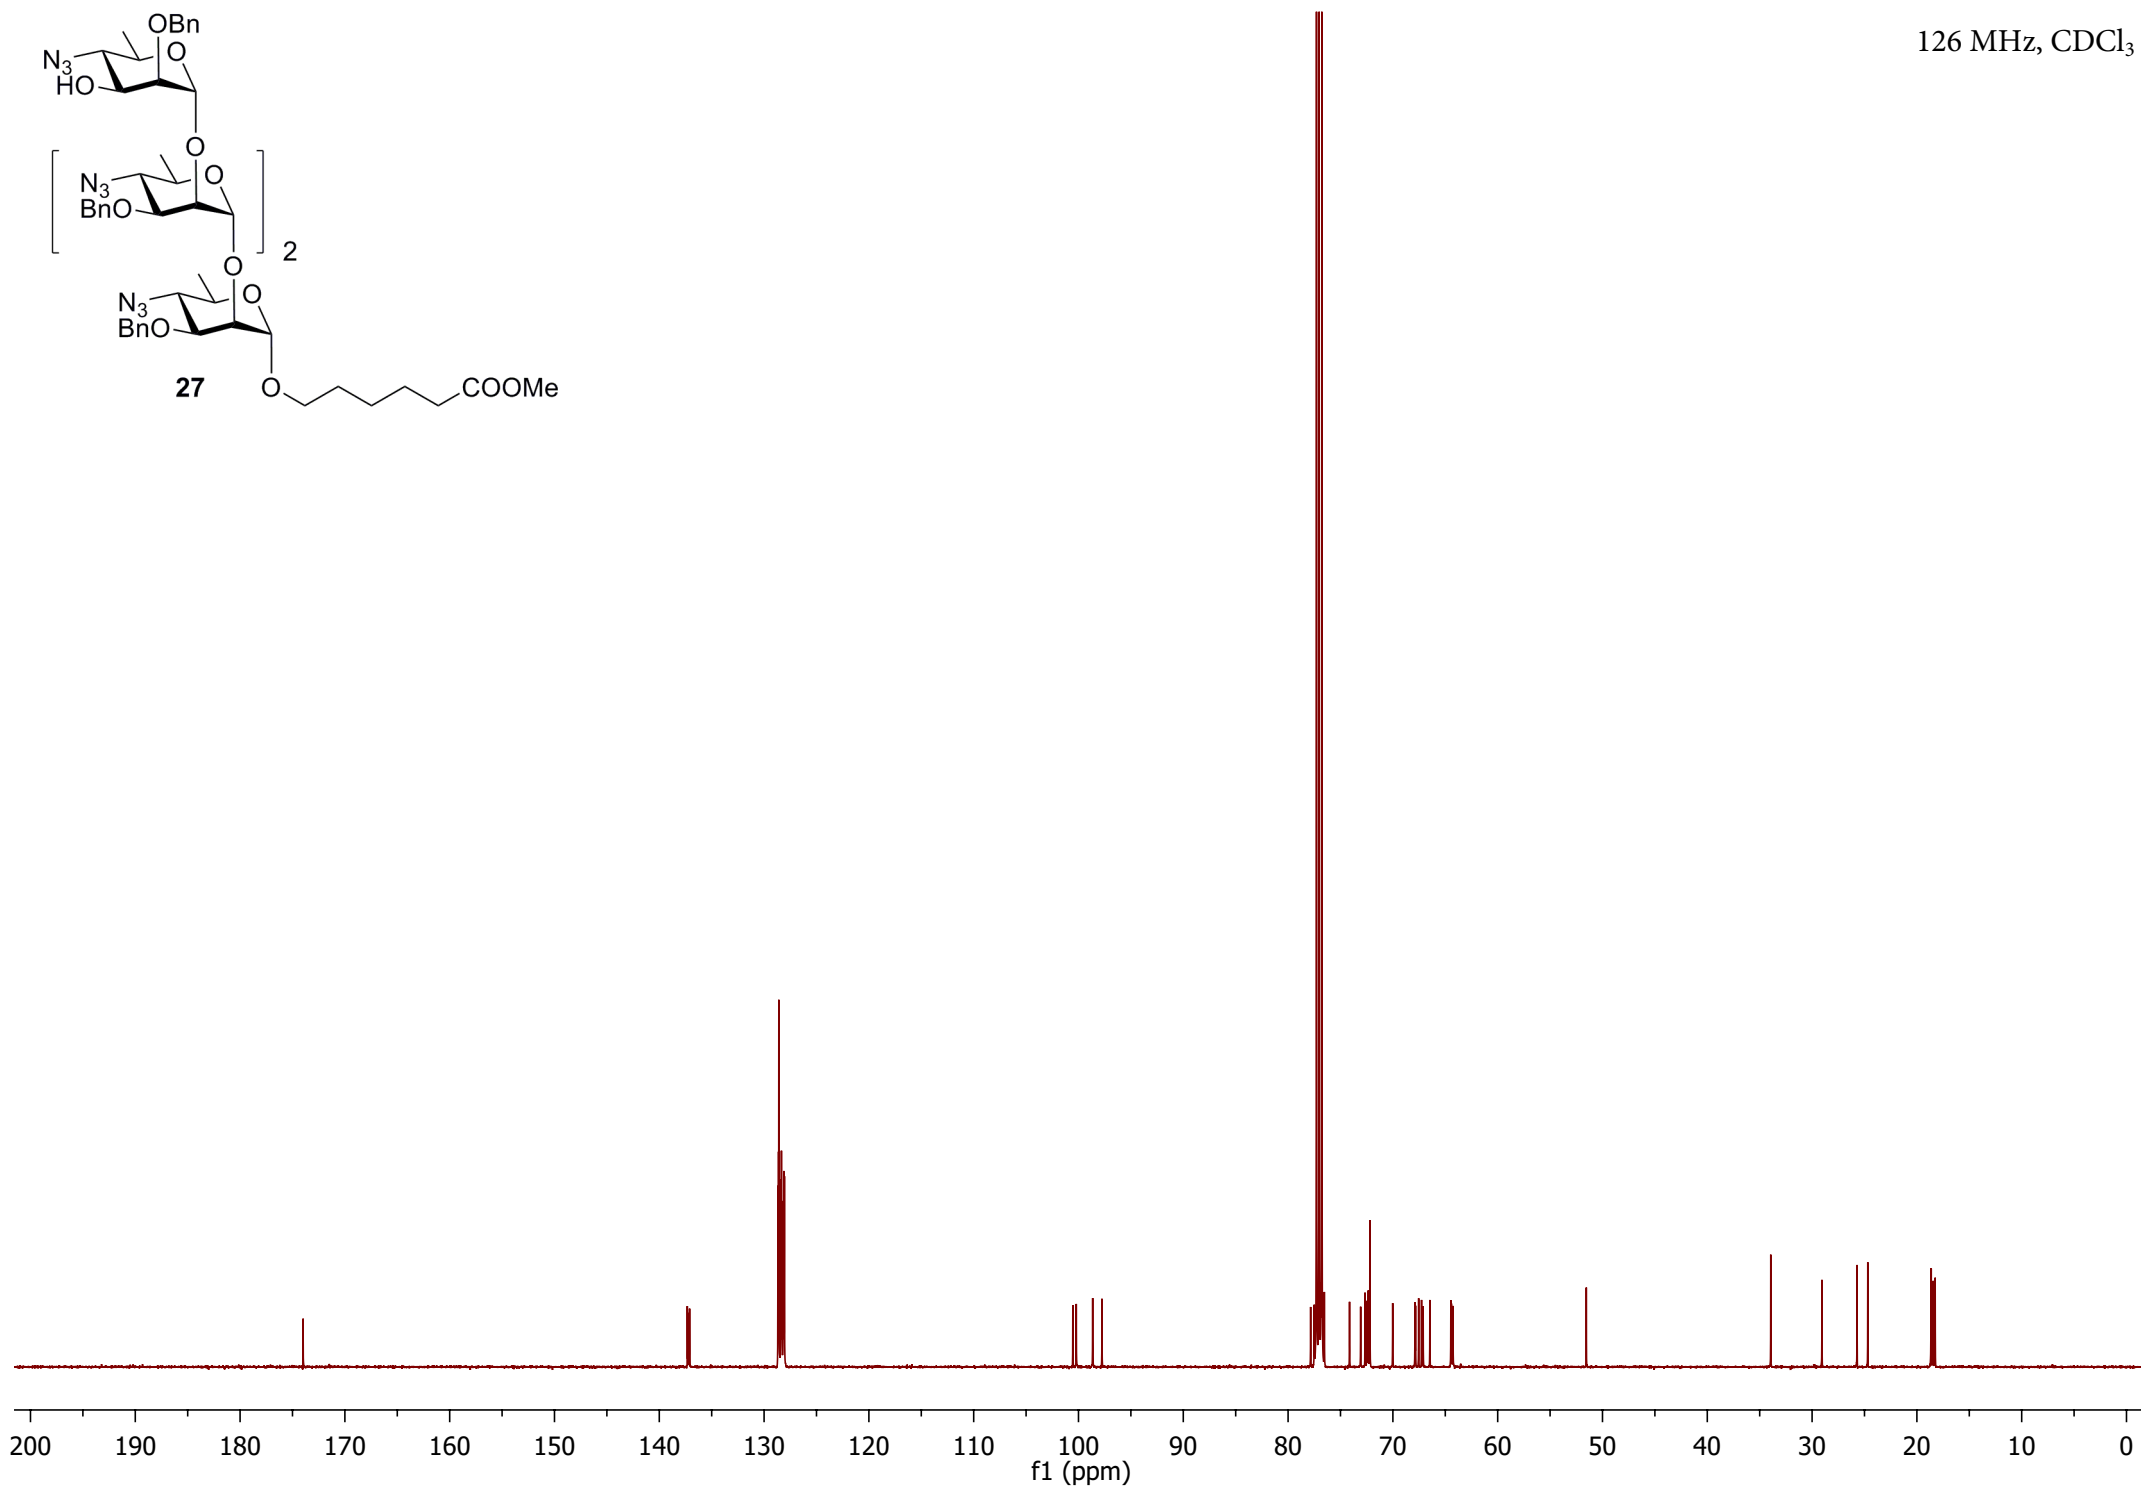

600 MHz, CDCl<sub>3</sub>

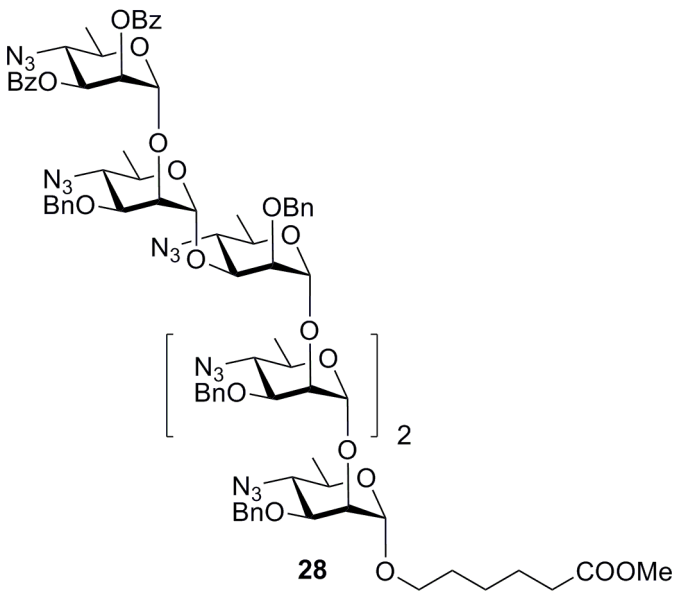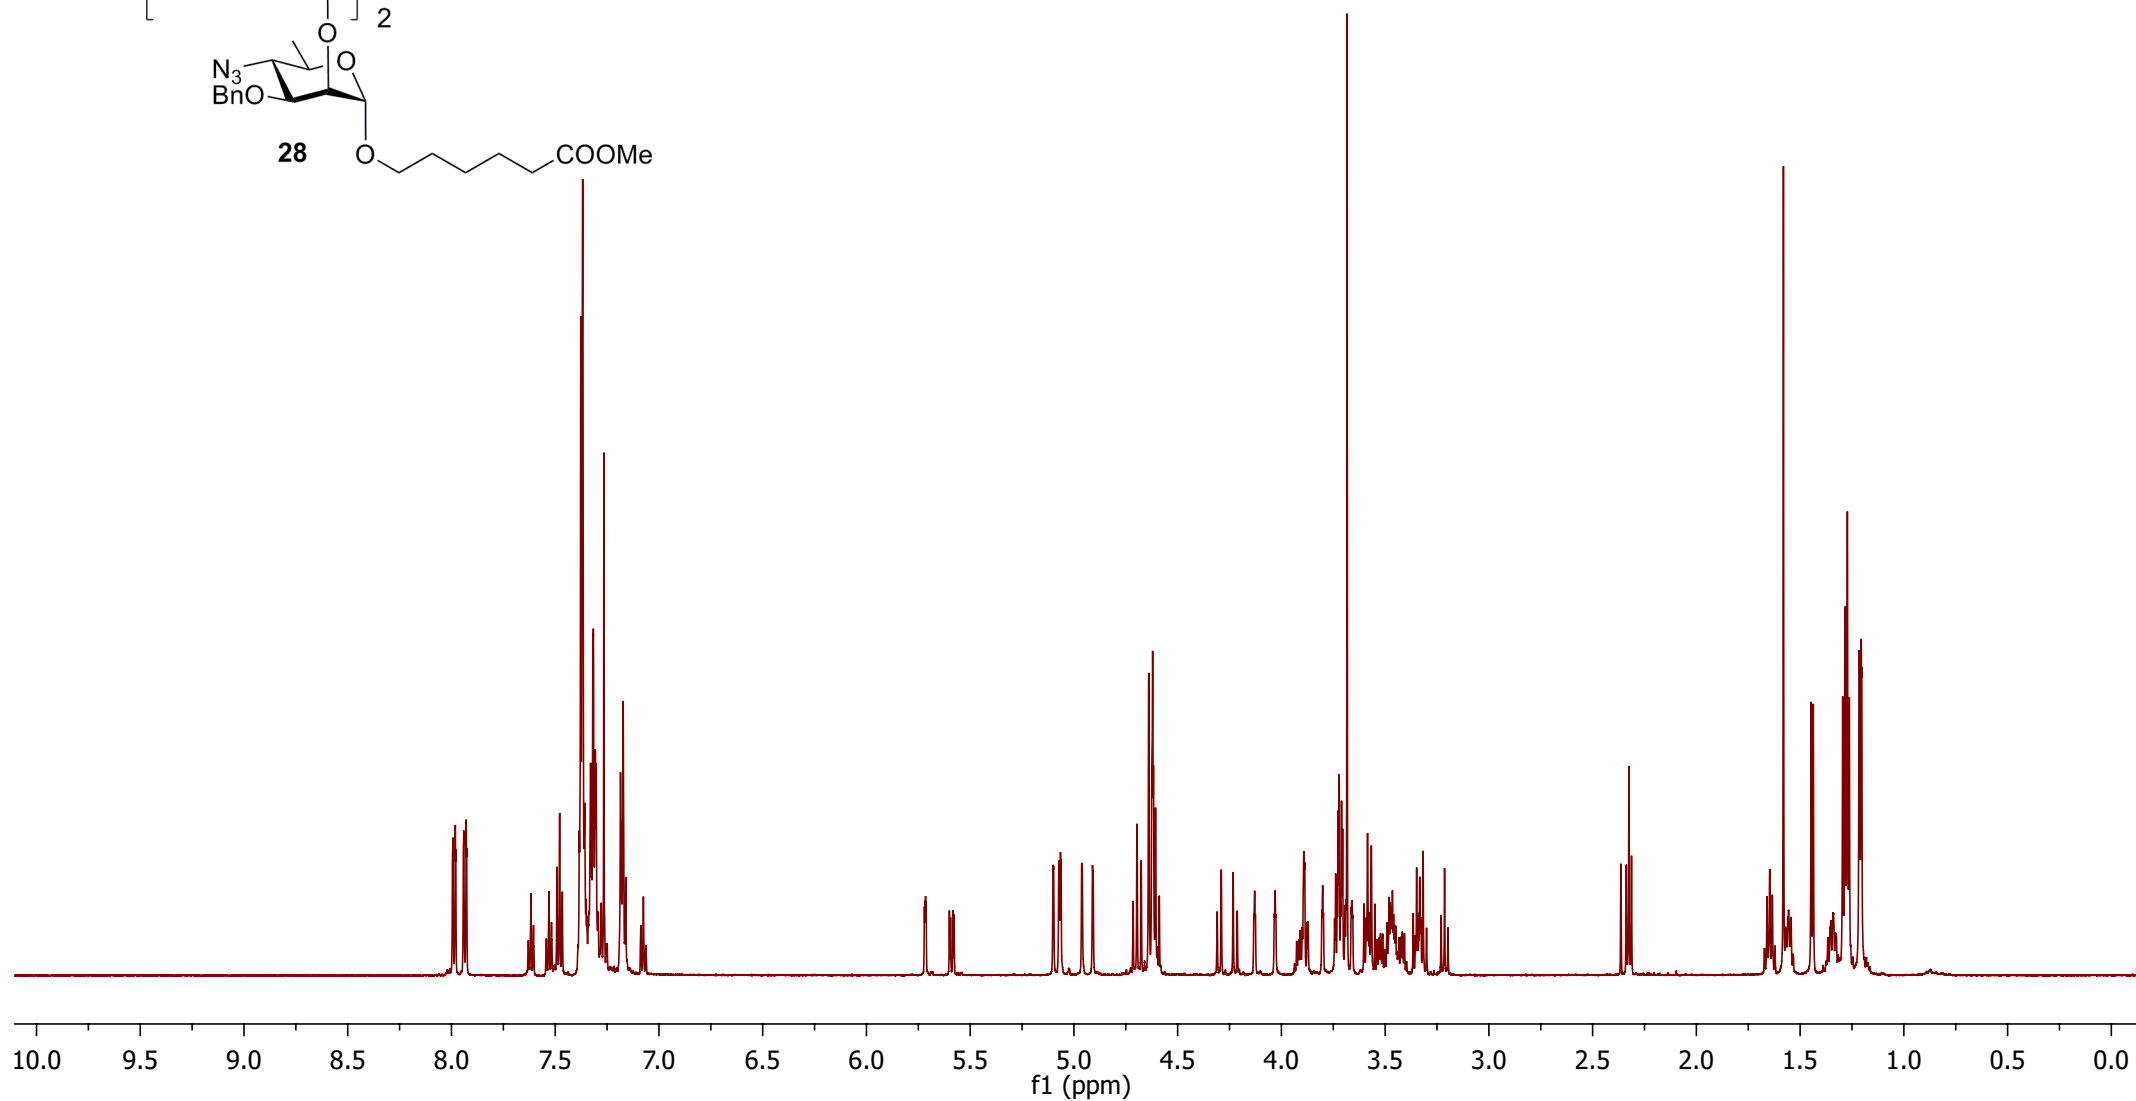

126 MHz, CDCl<sub>3</sub>

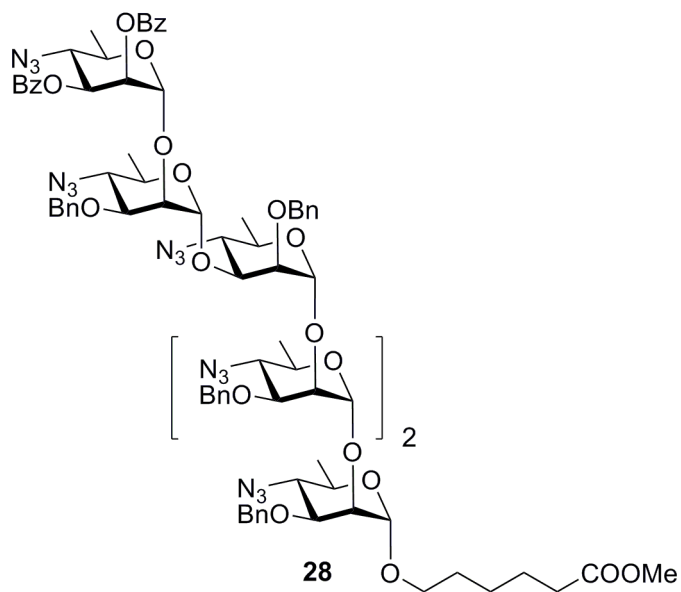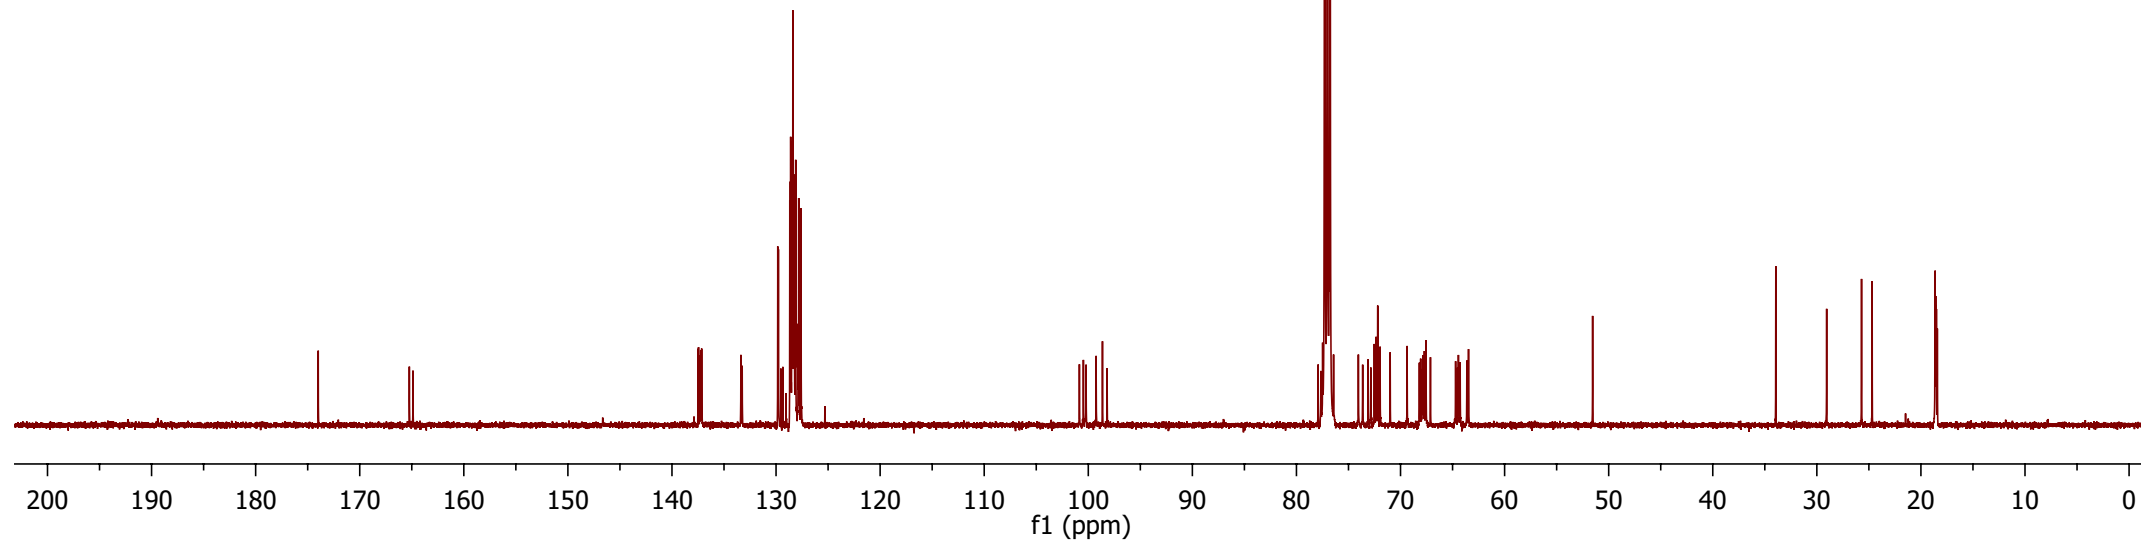

500 MHz, CDCl<sub>3</sub>

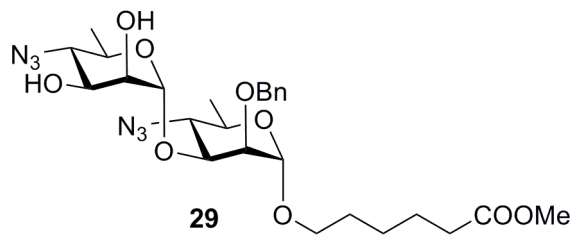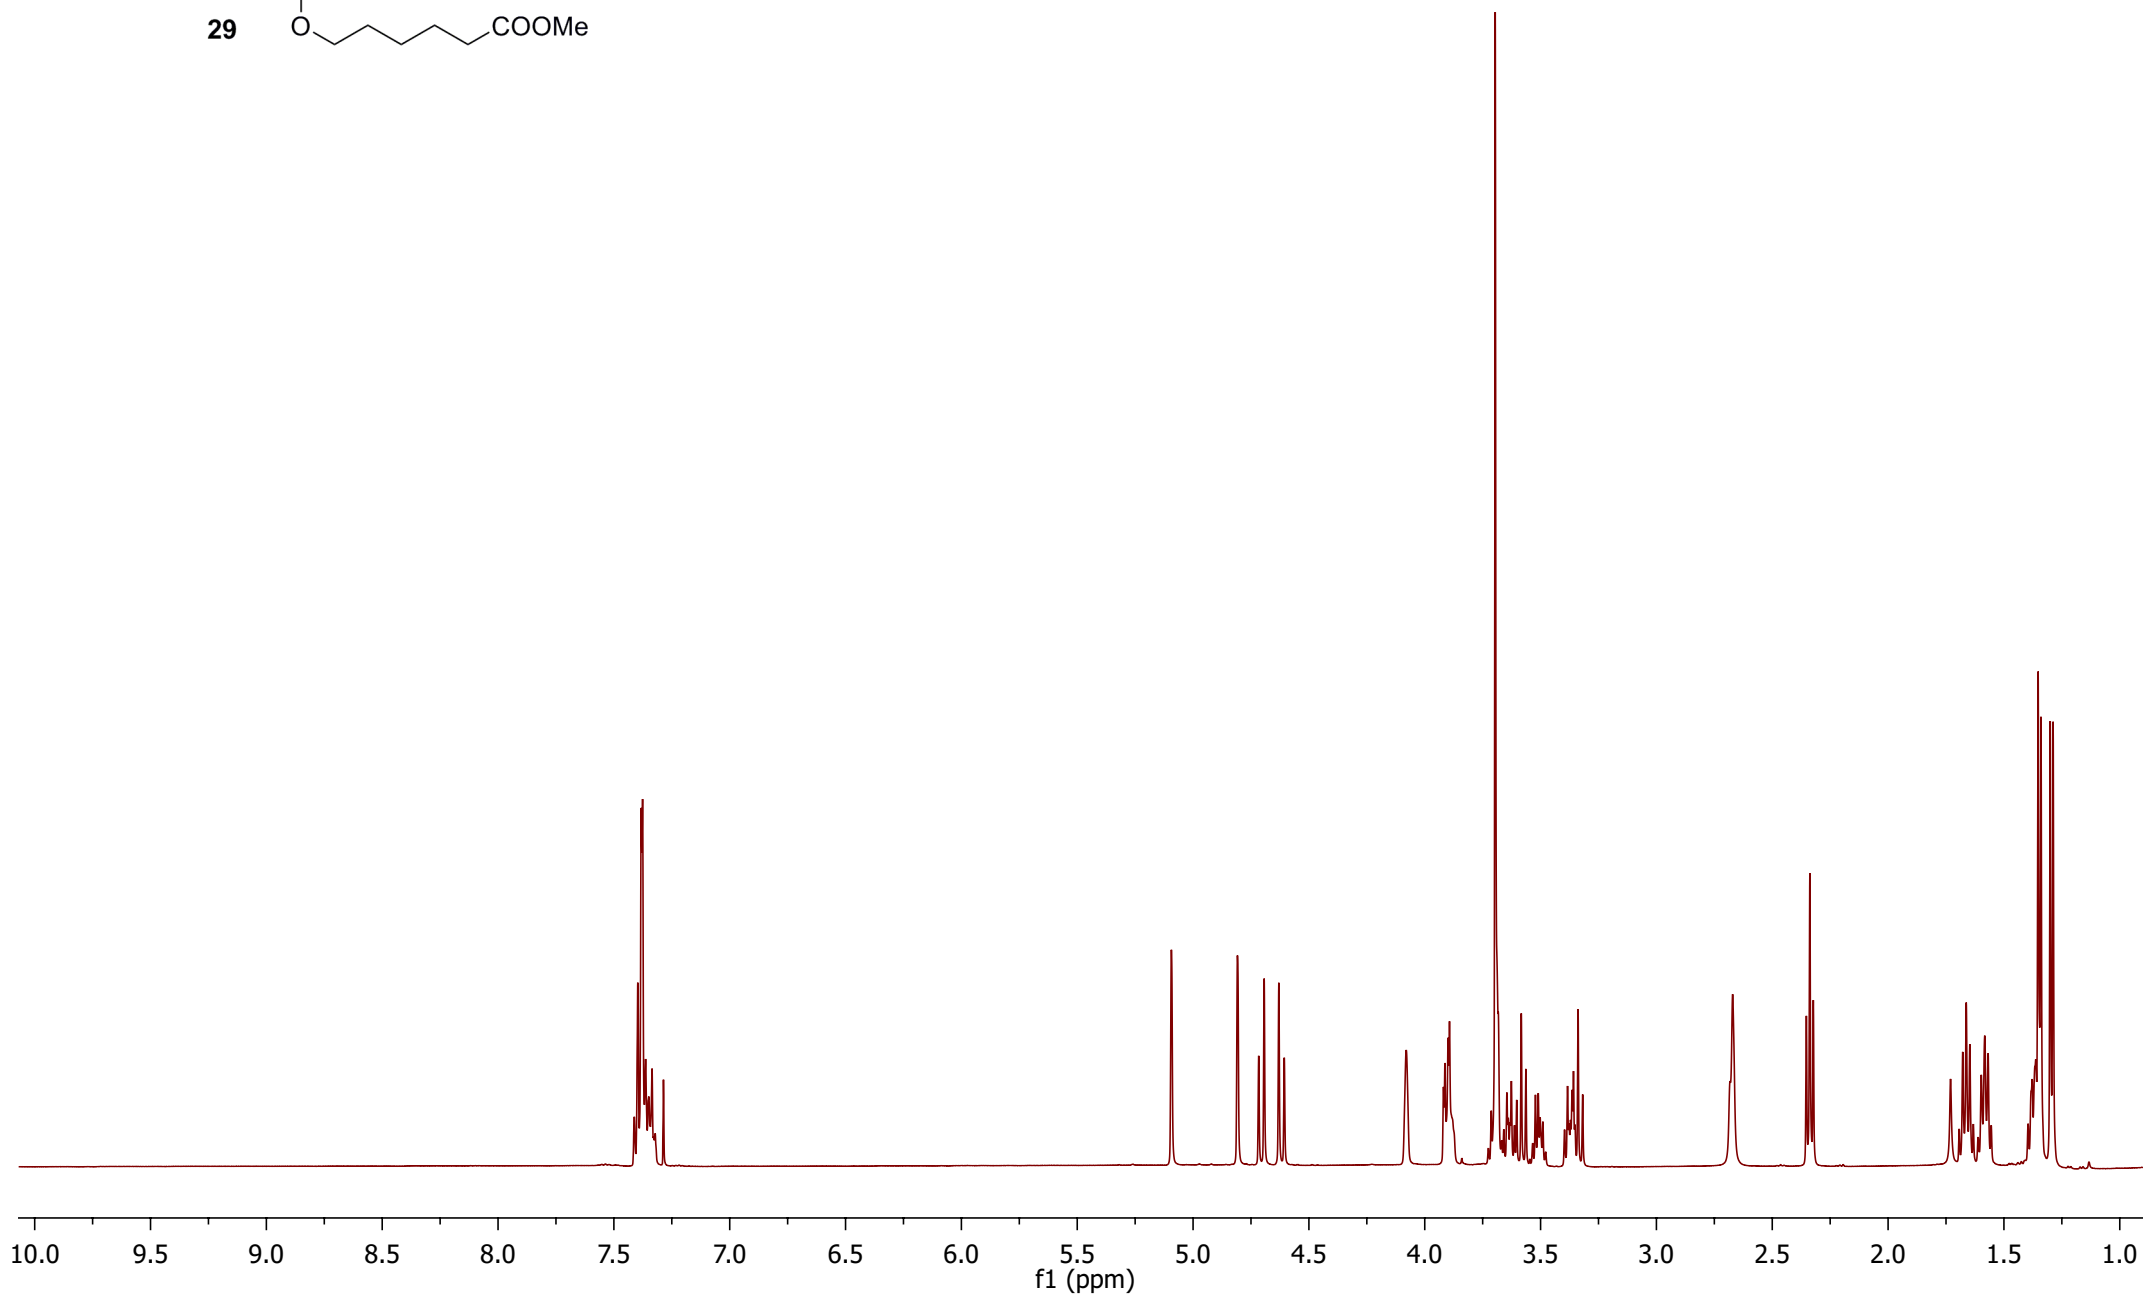

126 MHz, CDCl<sub>3</sub>

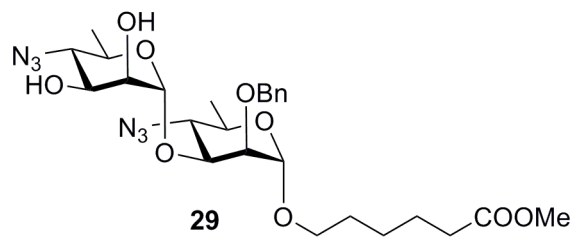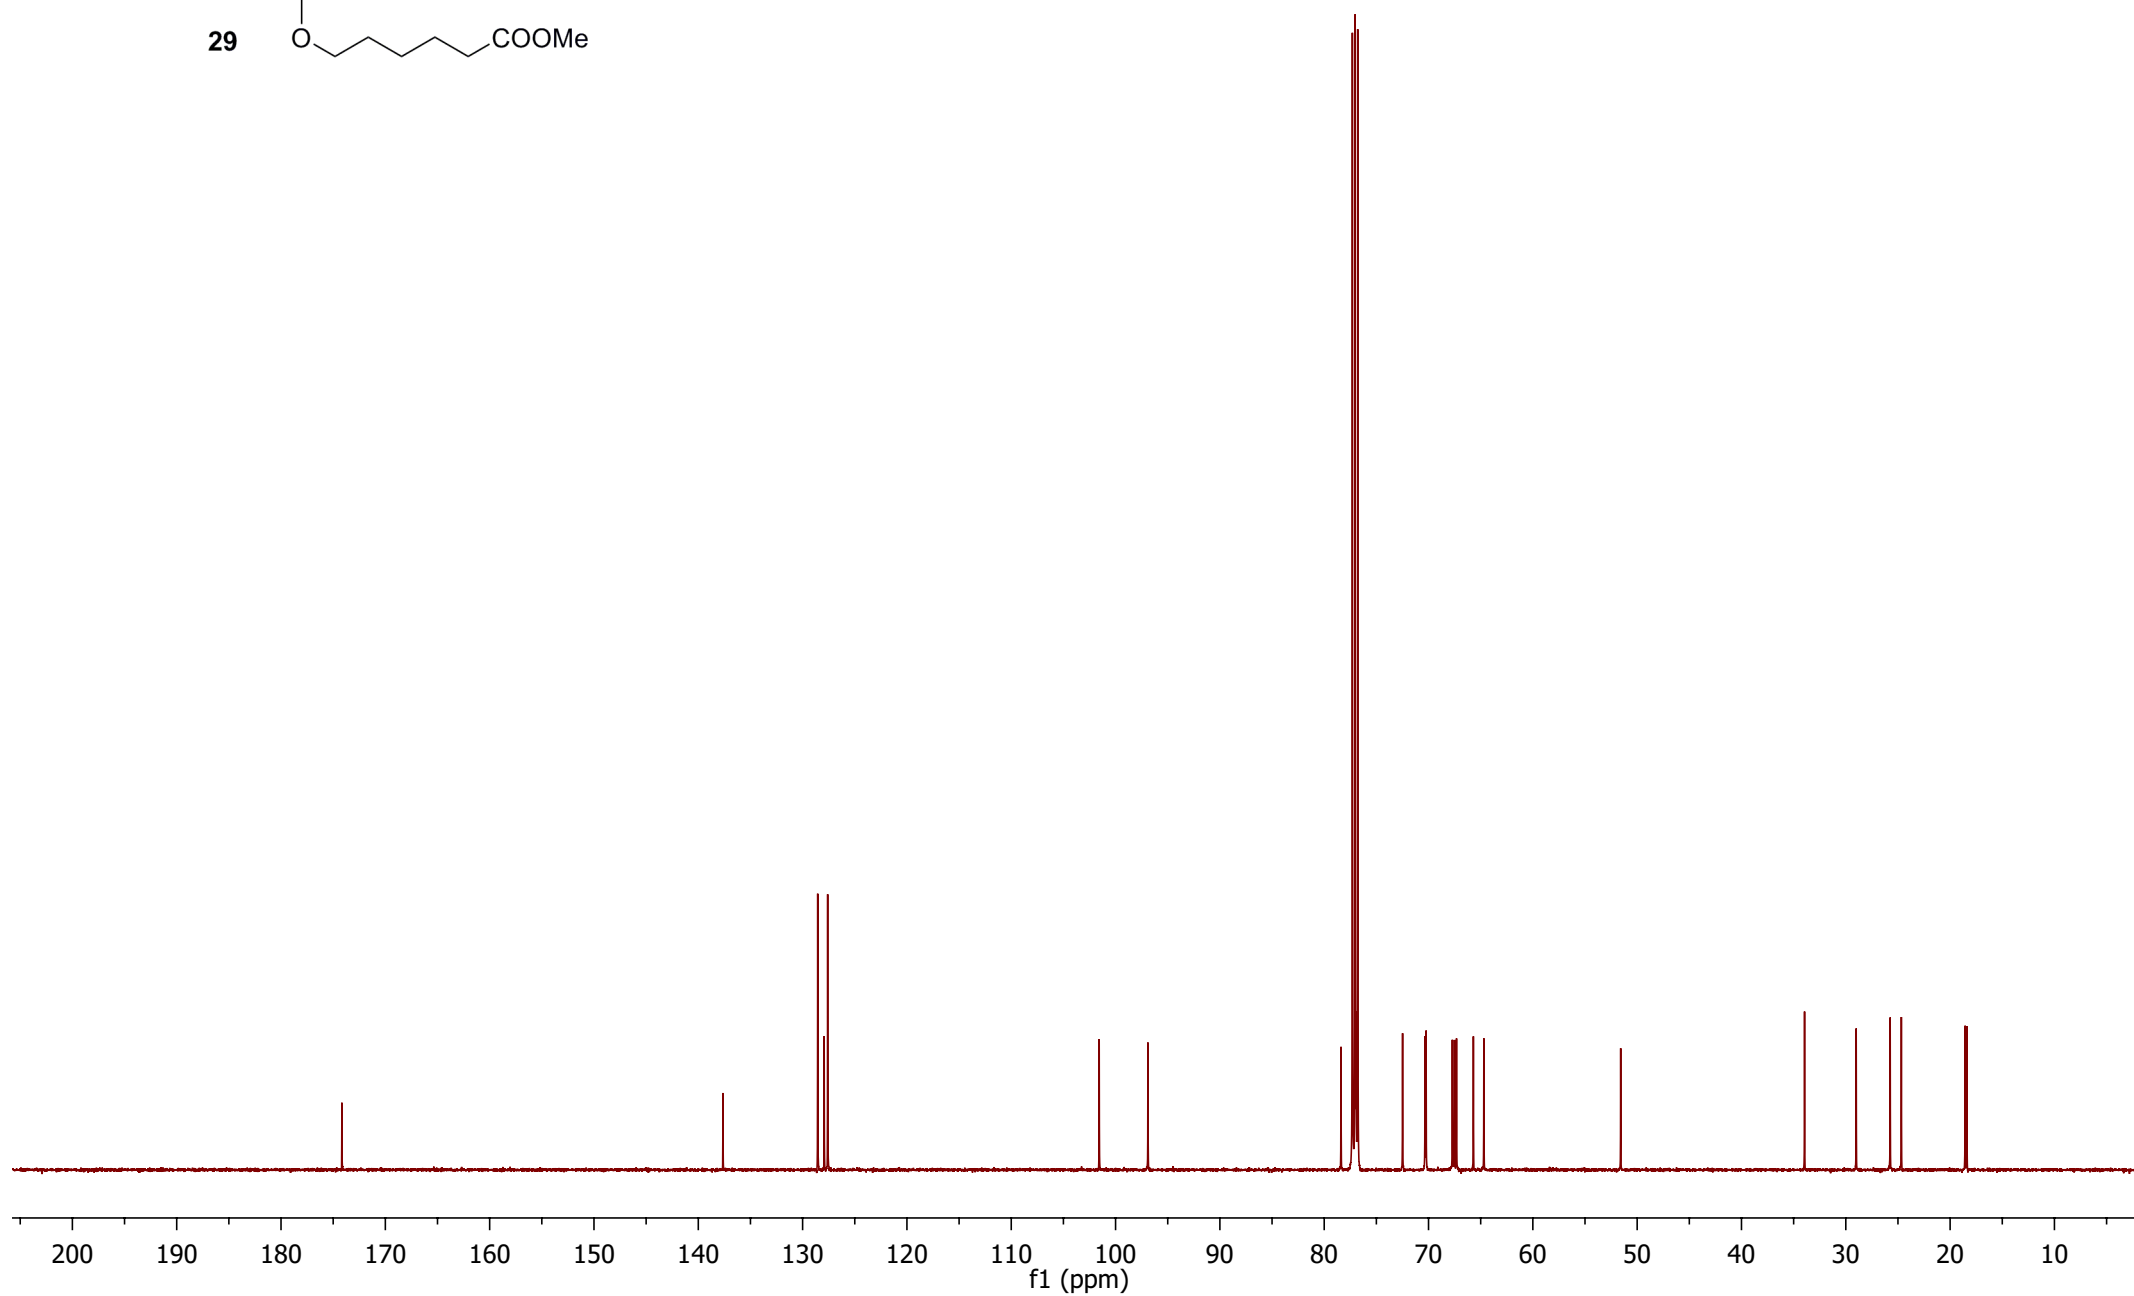



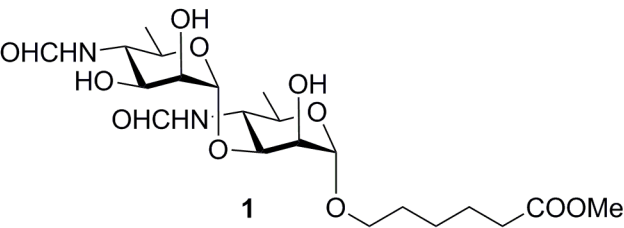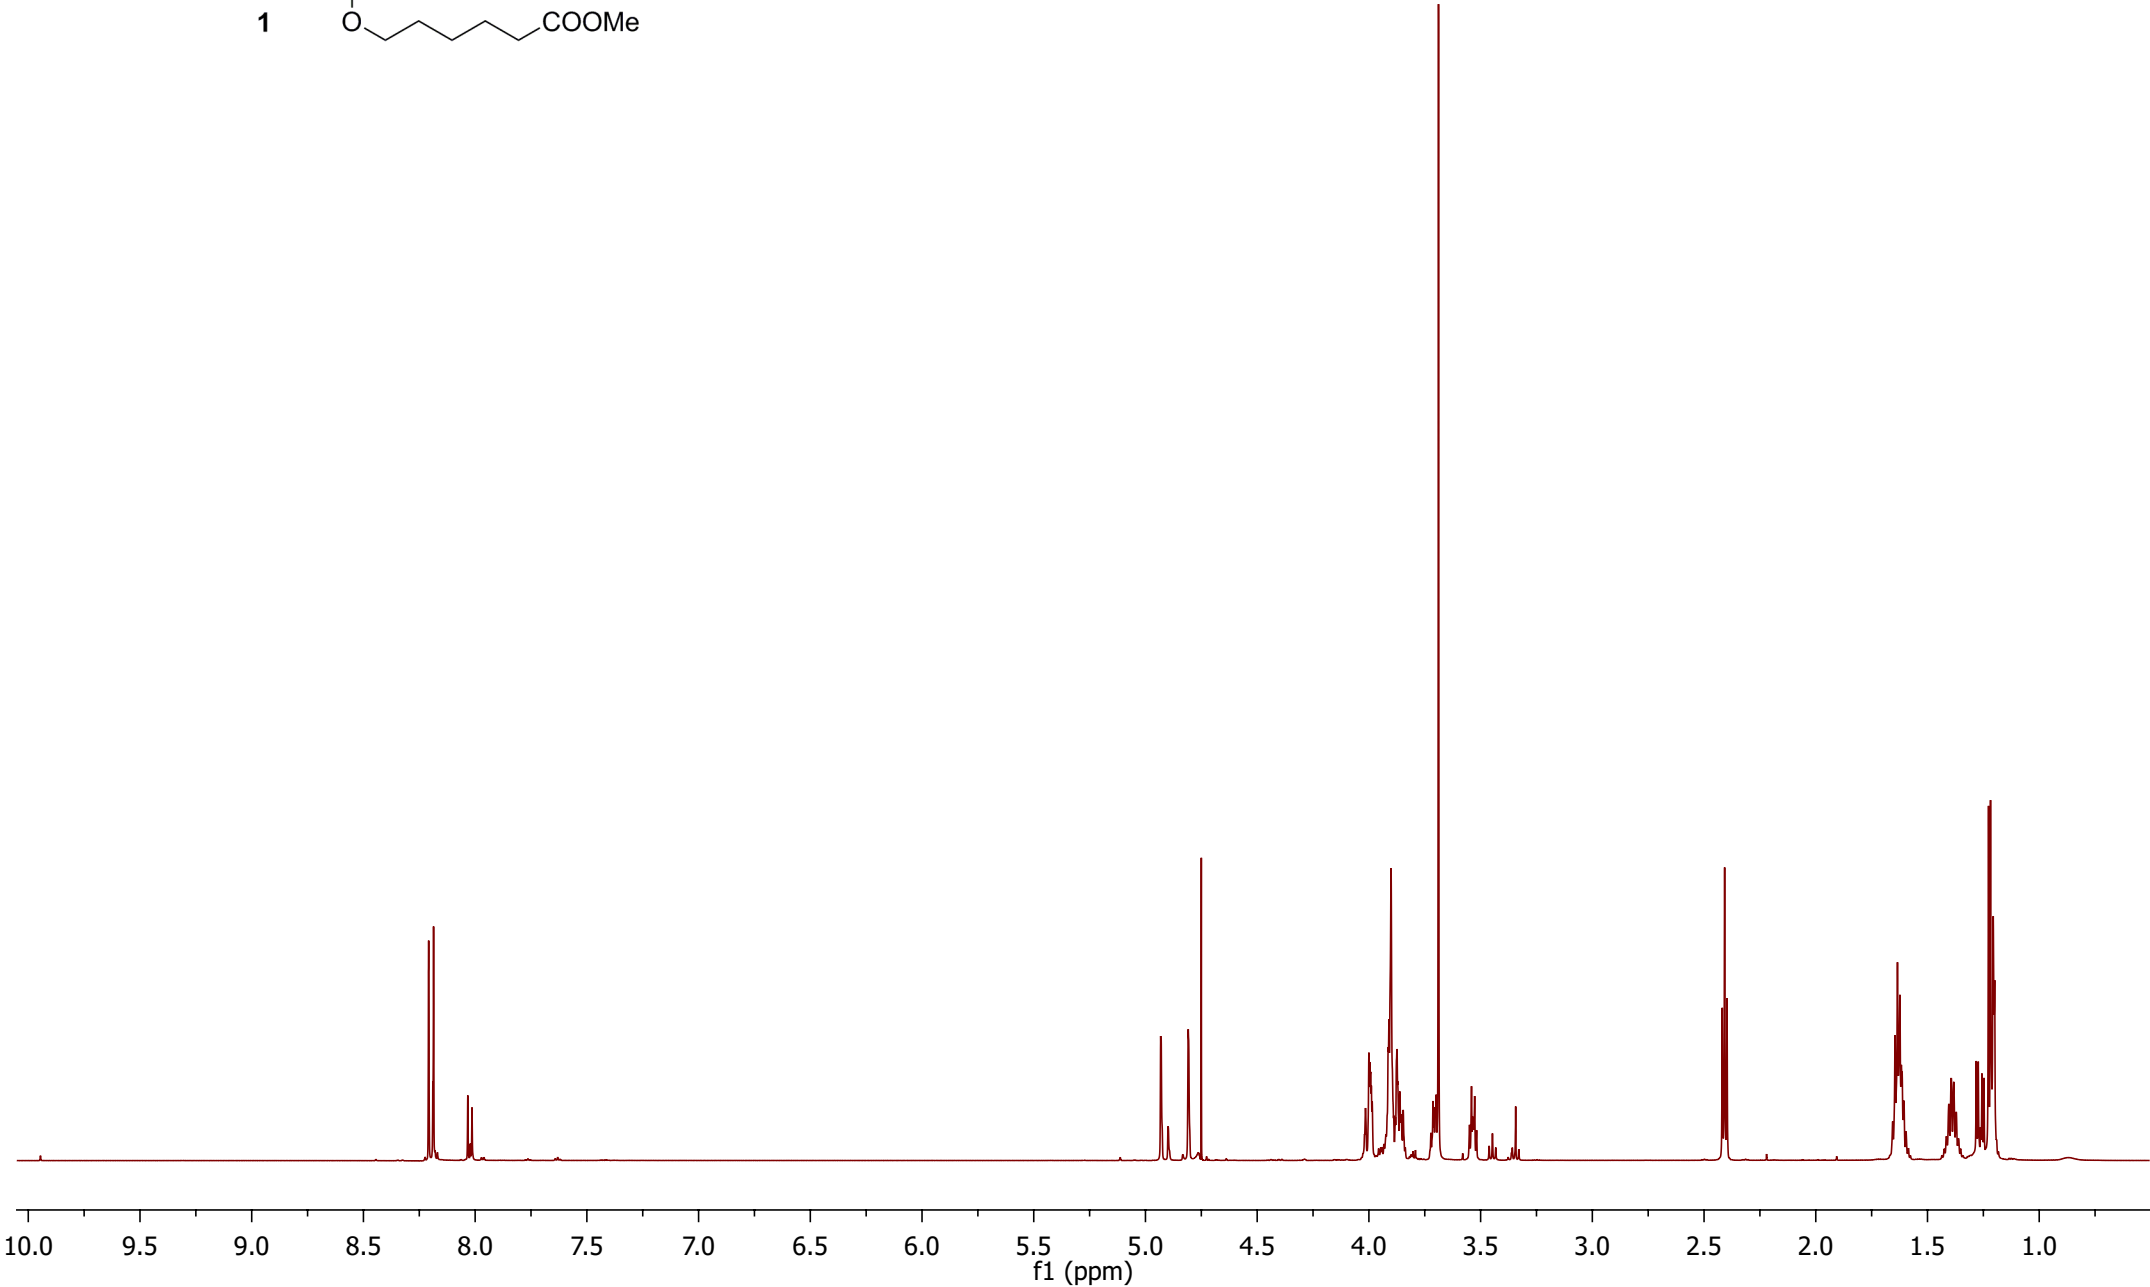

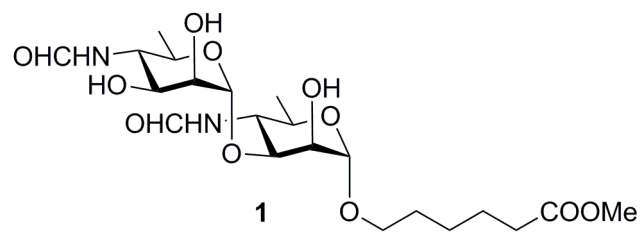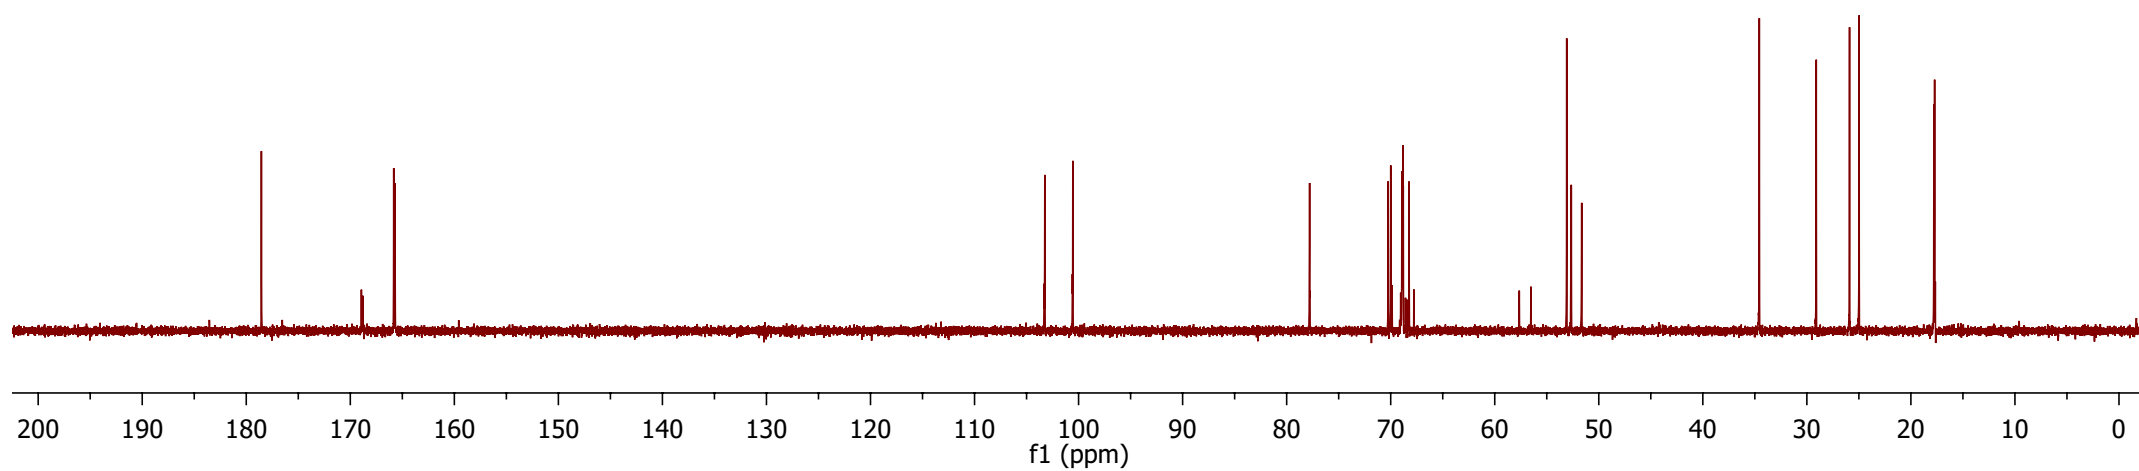

500 MHz, CDCl<sub>3</sub>

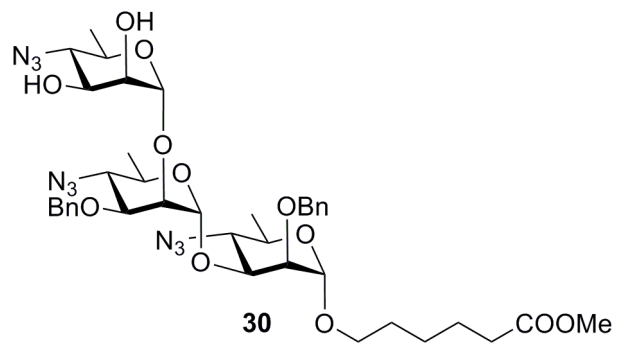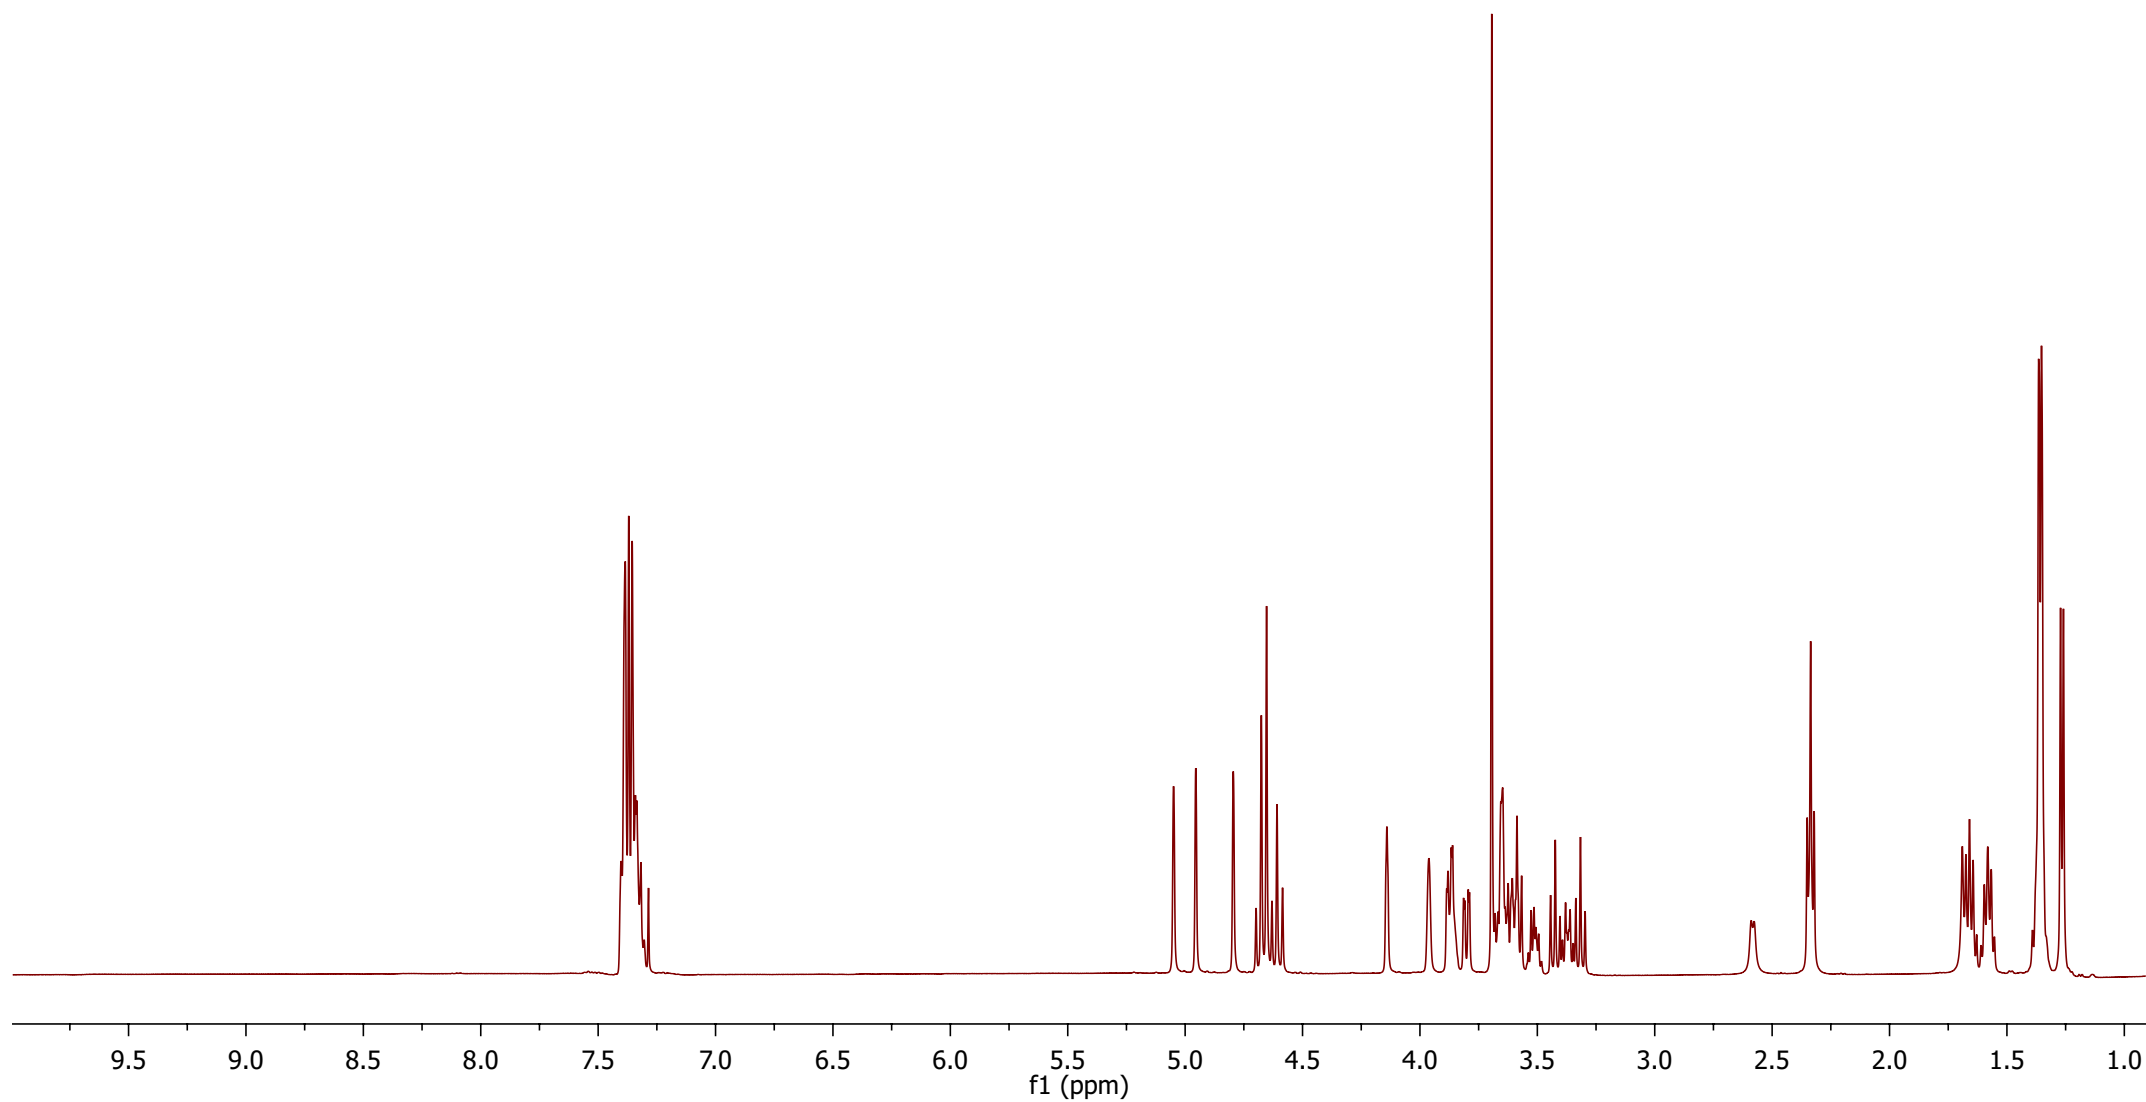

126 MHz, CDCl<sub>3</sub>

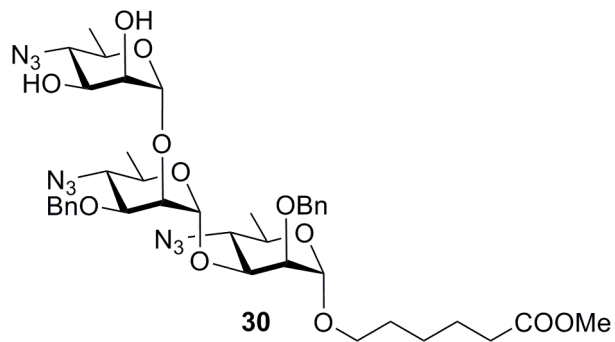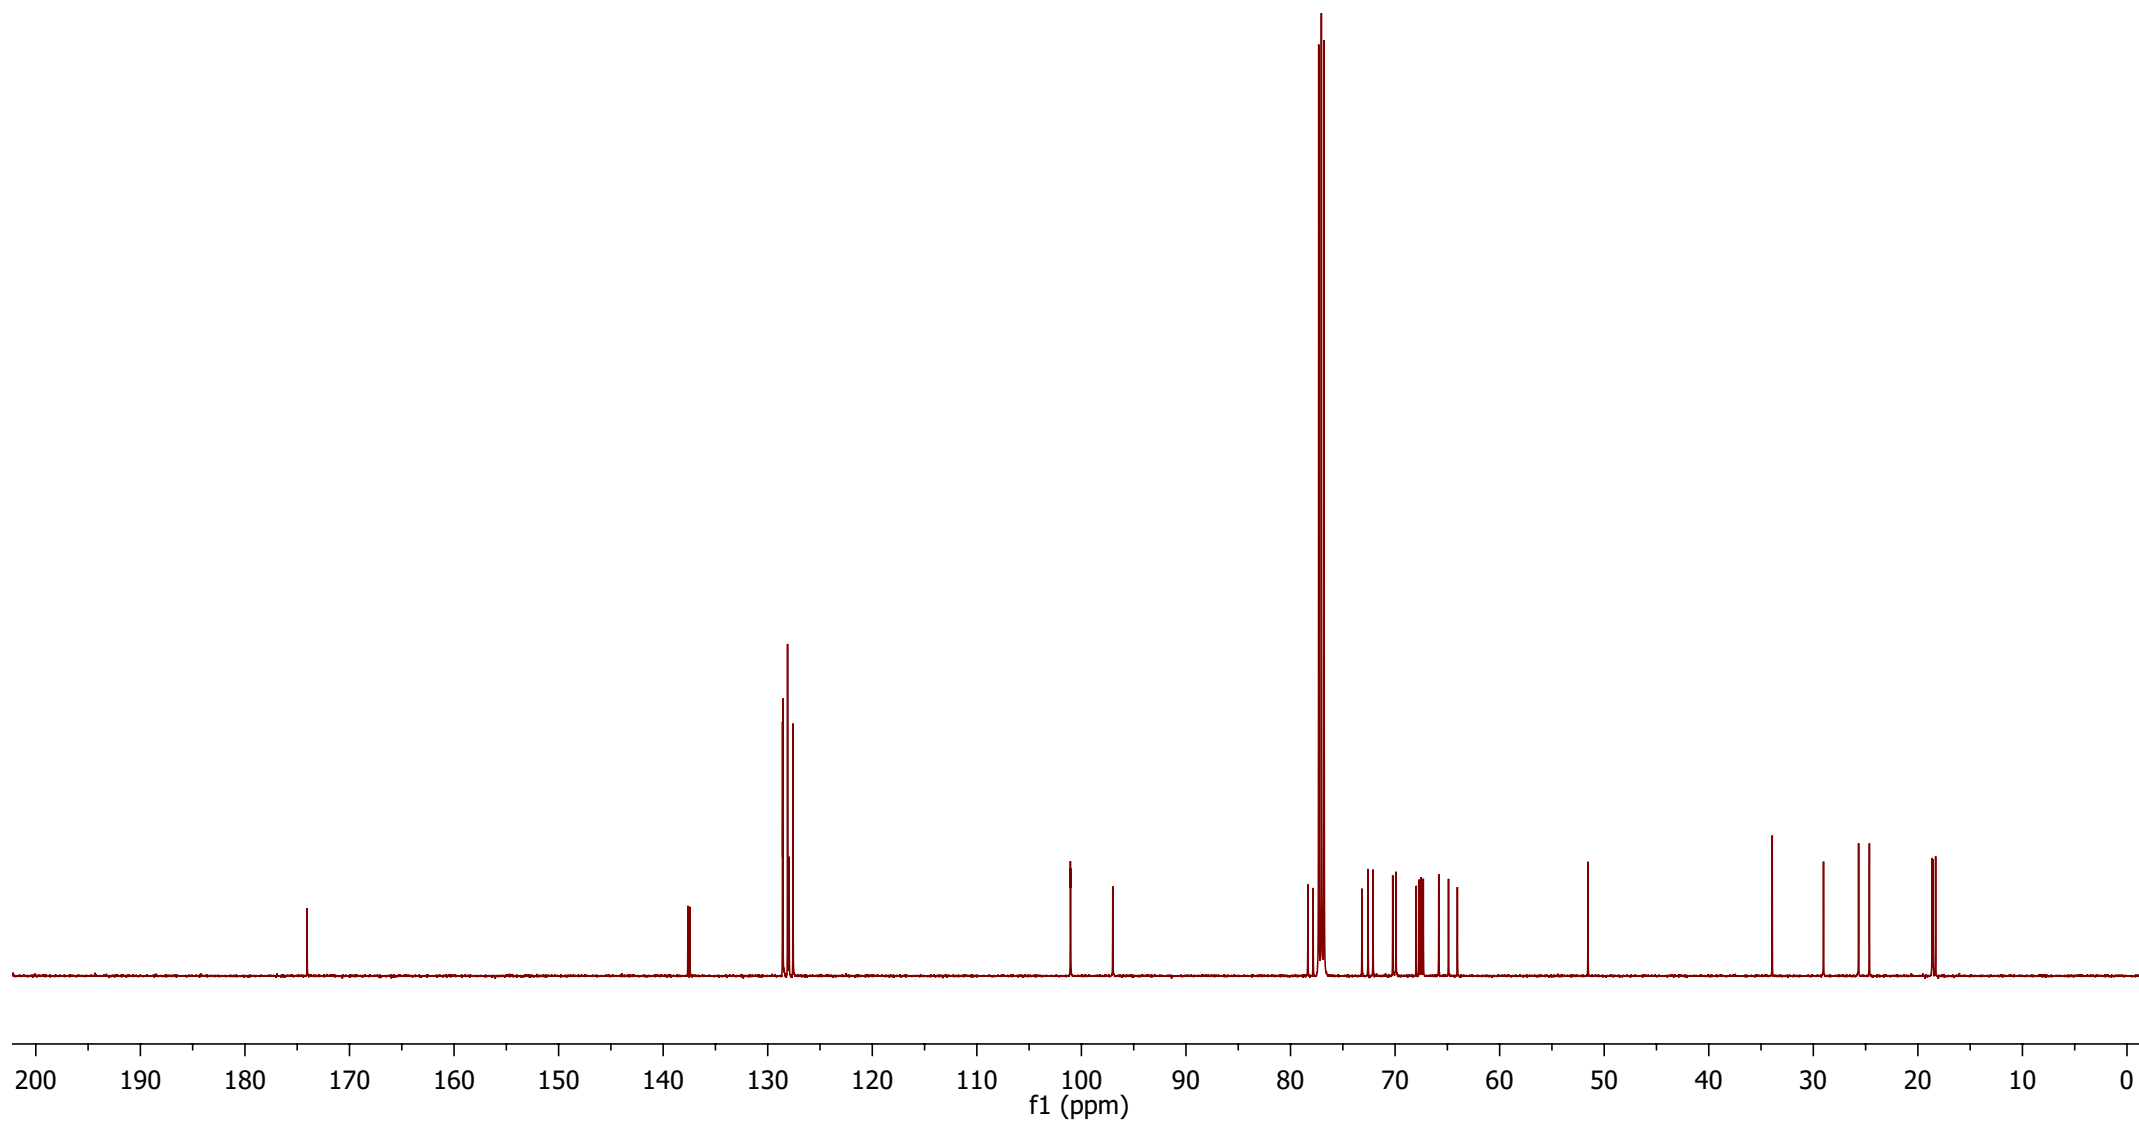

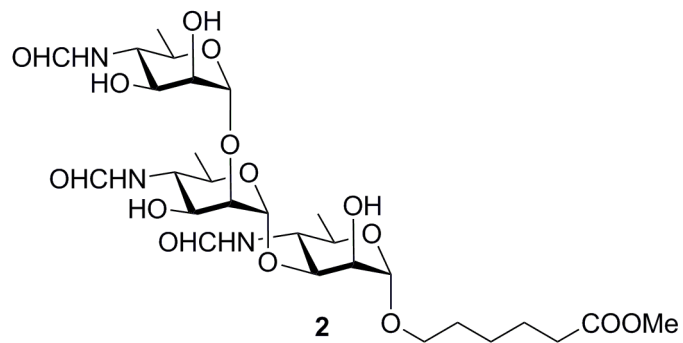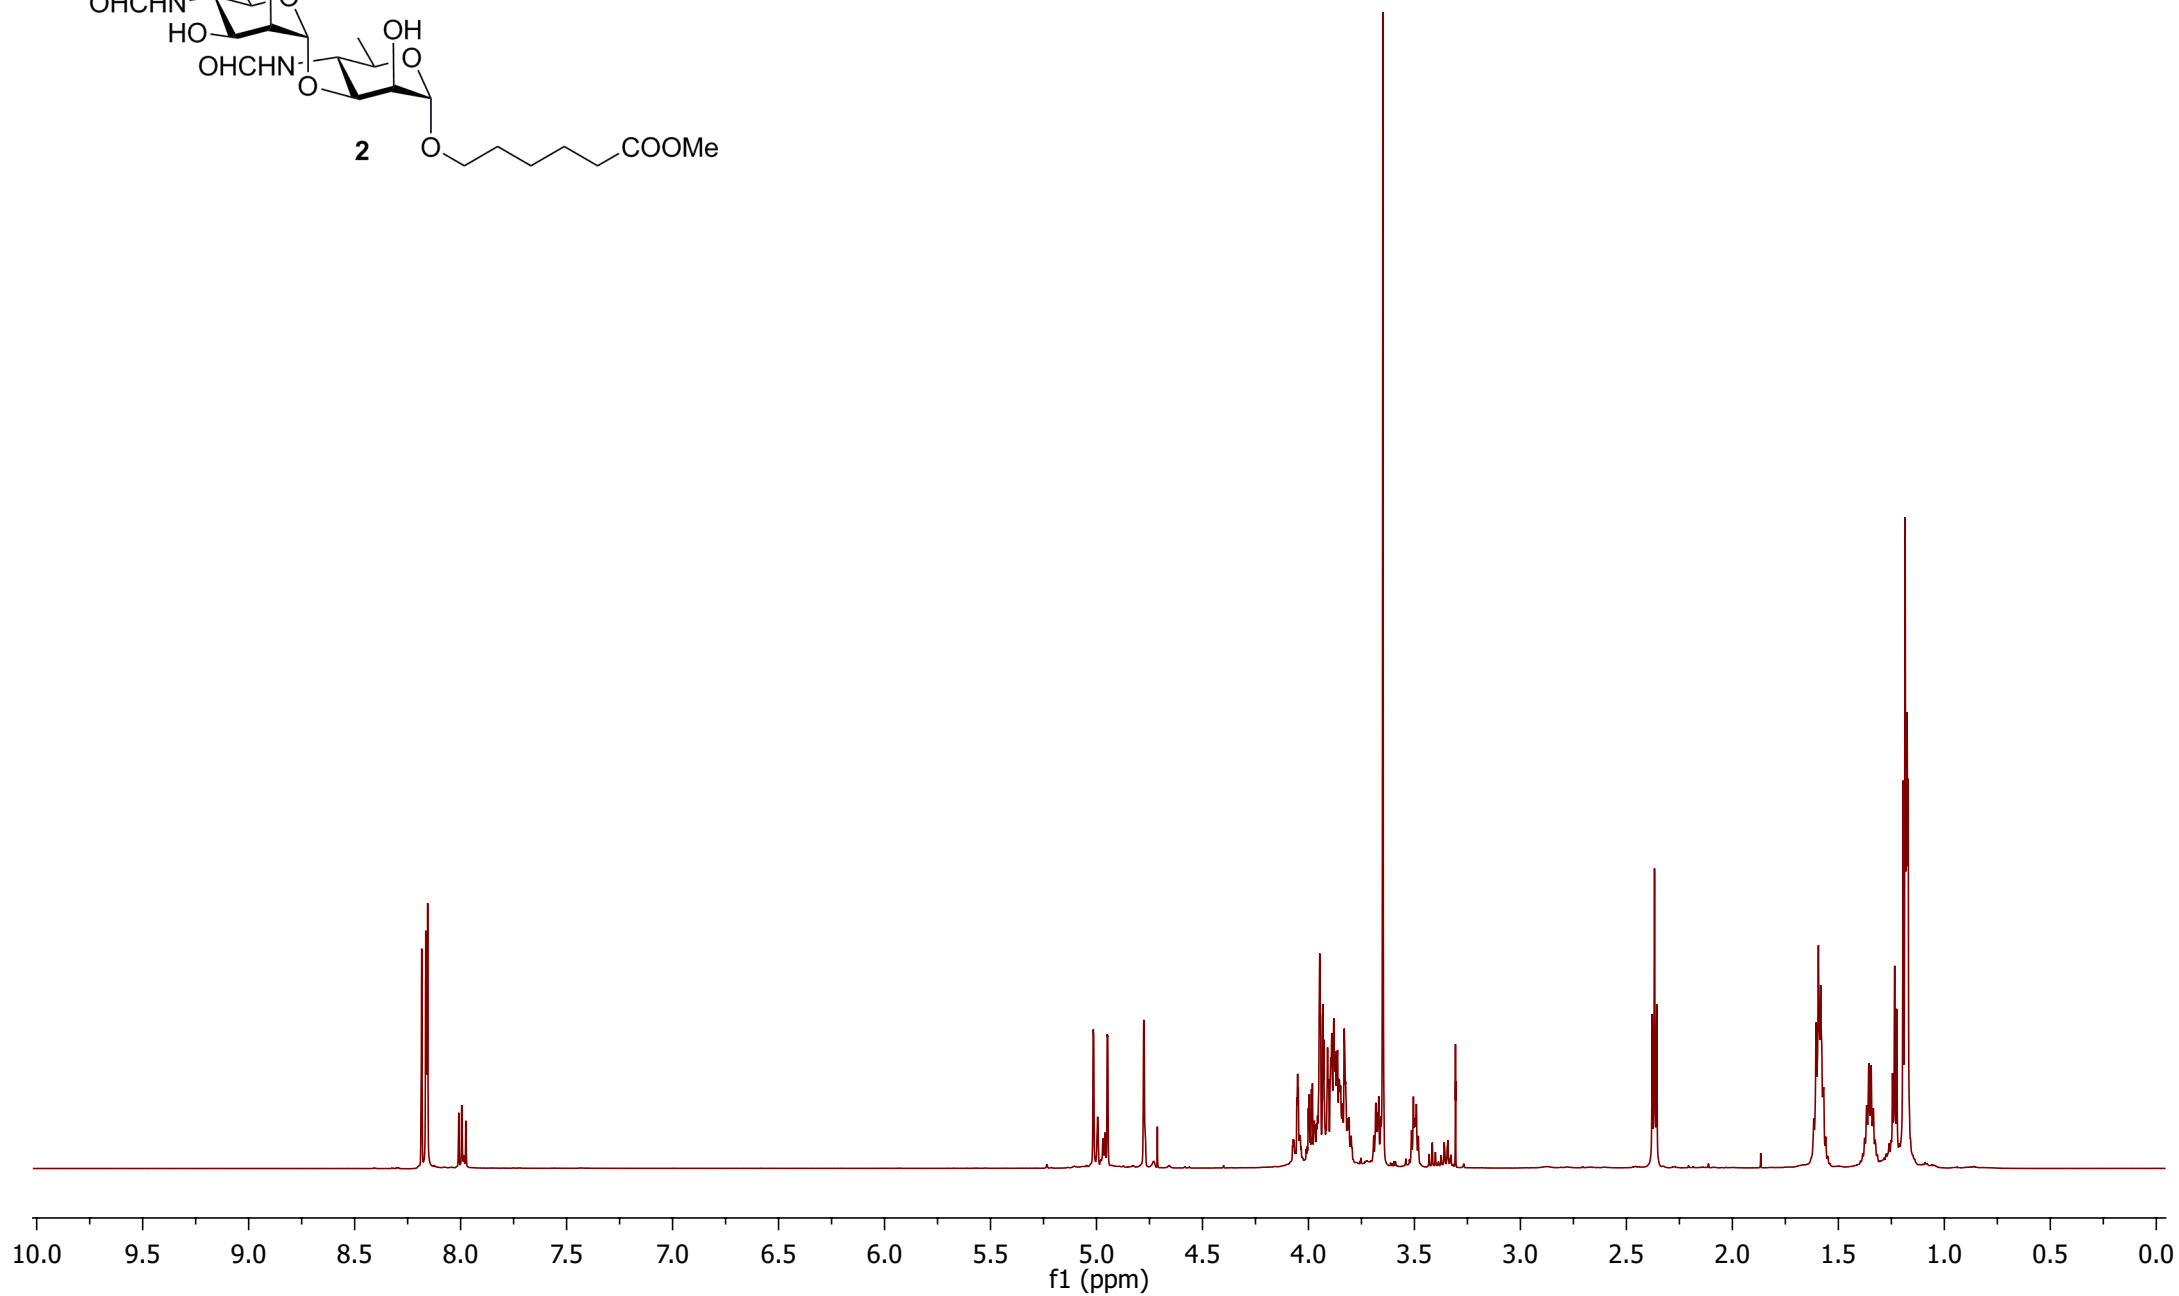

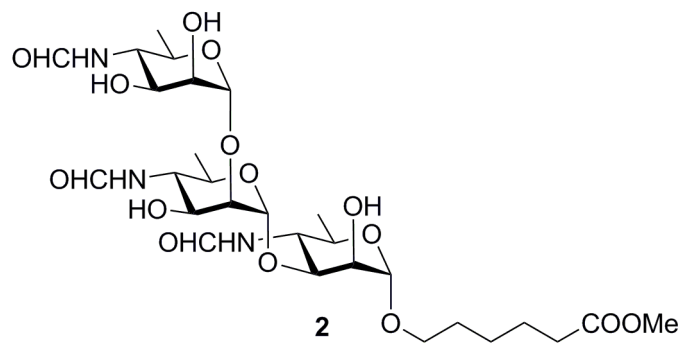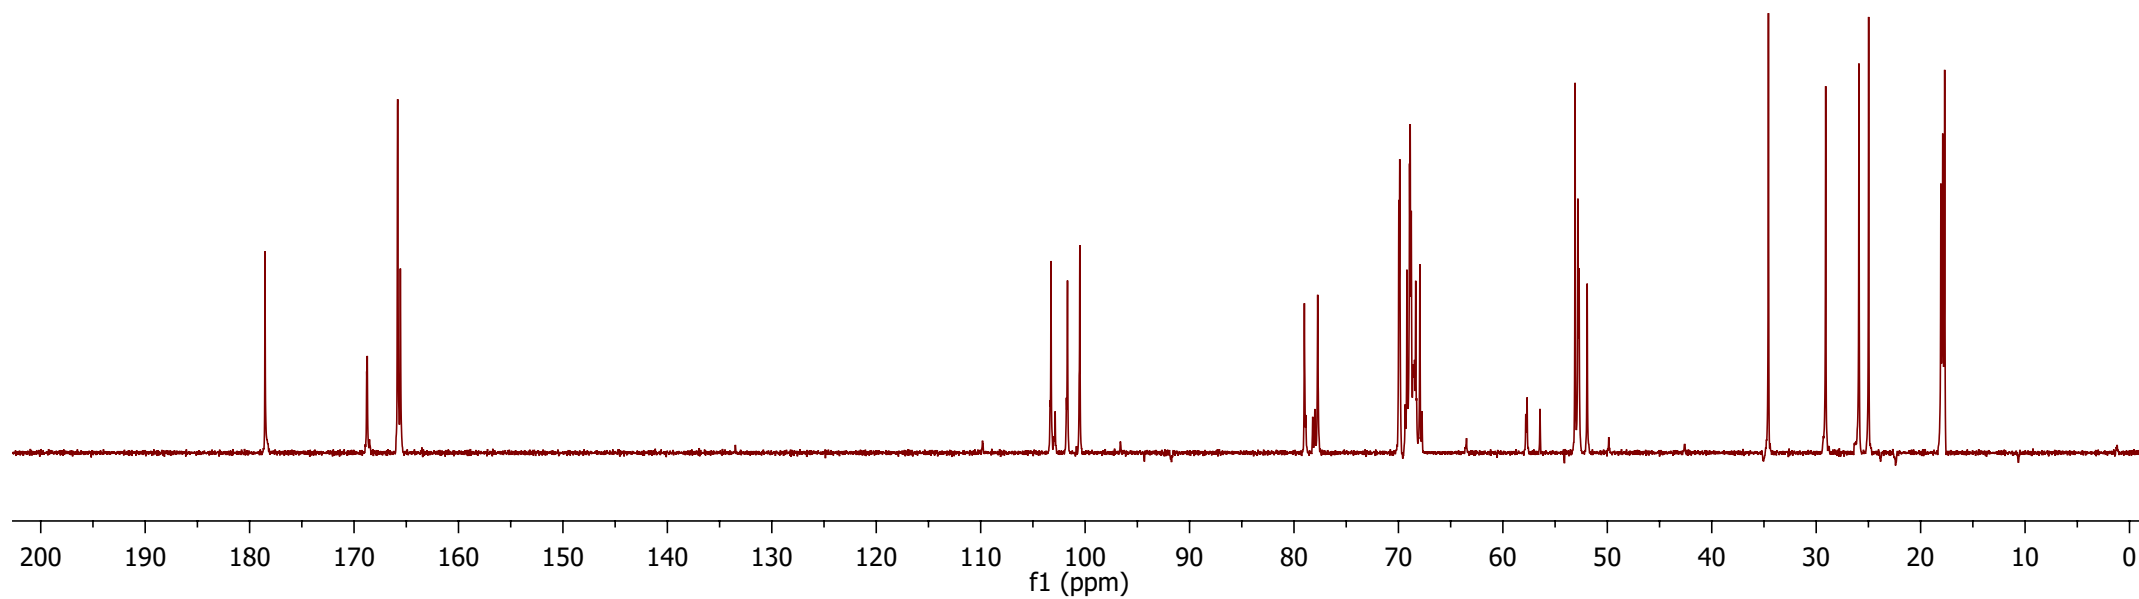

500 MHz, CDCl<sub>3</sub>

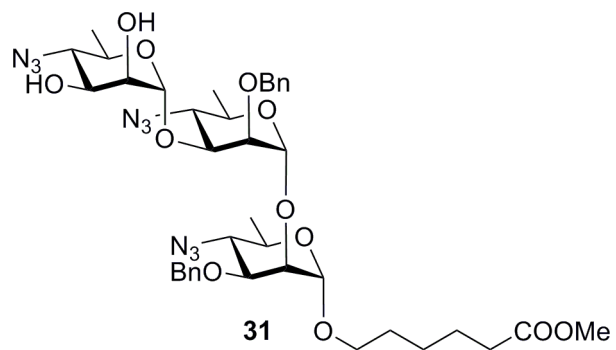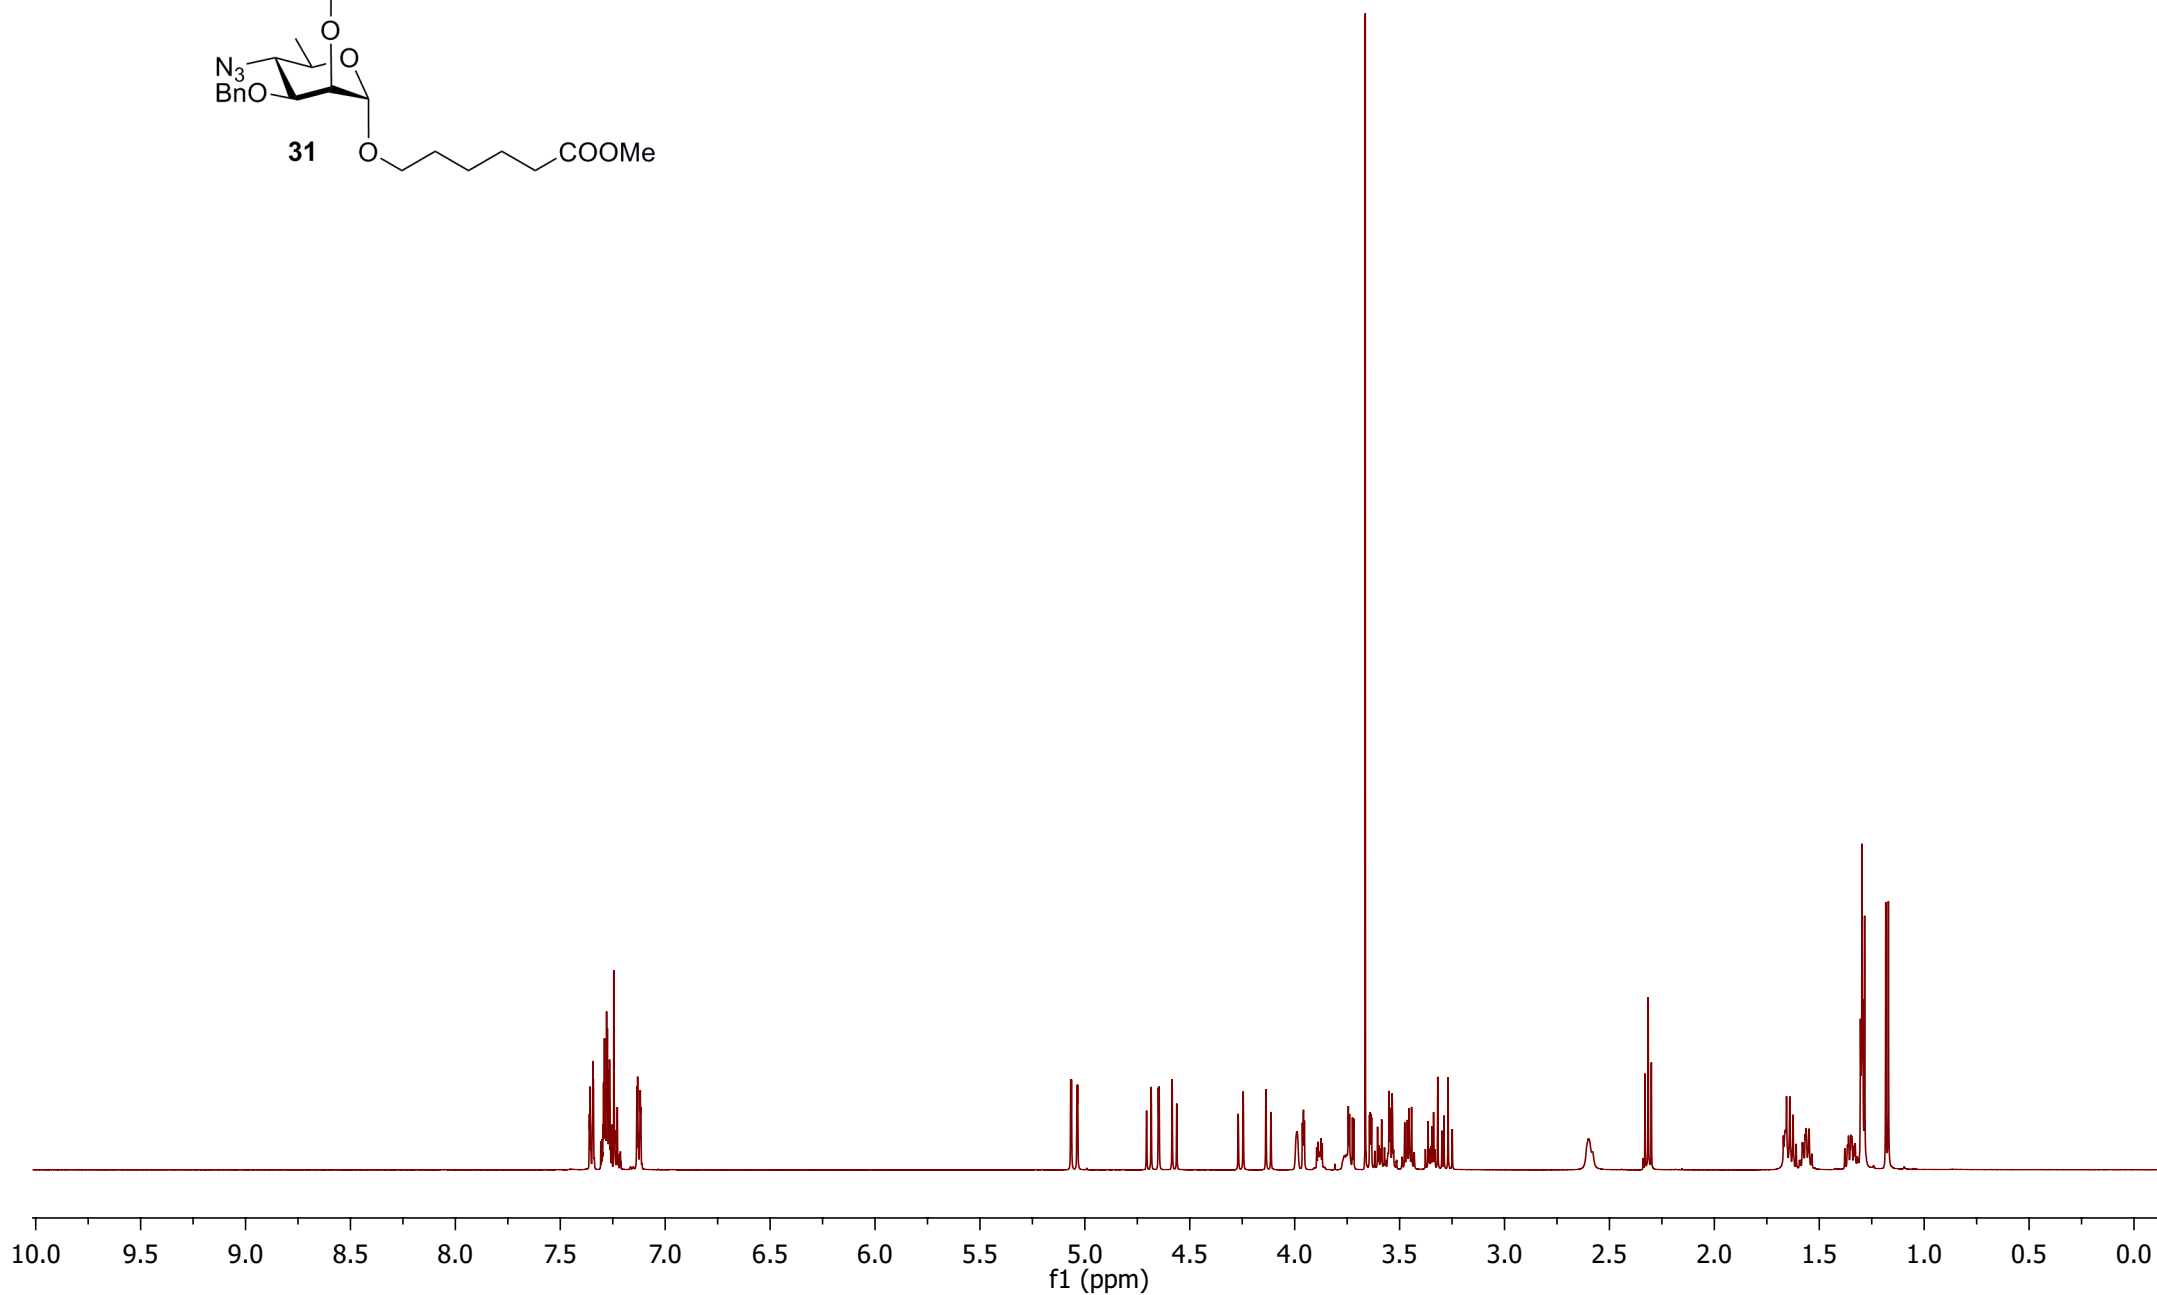

126 MHz, CDCl<sub>3</sub>

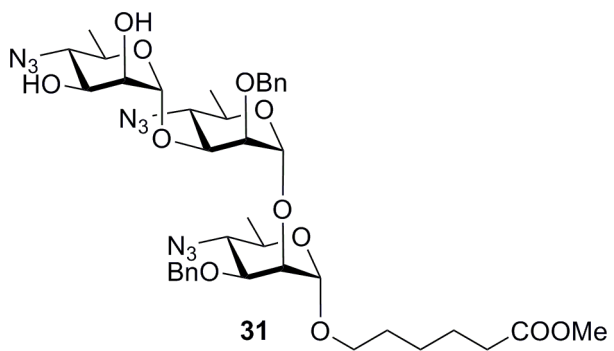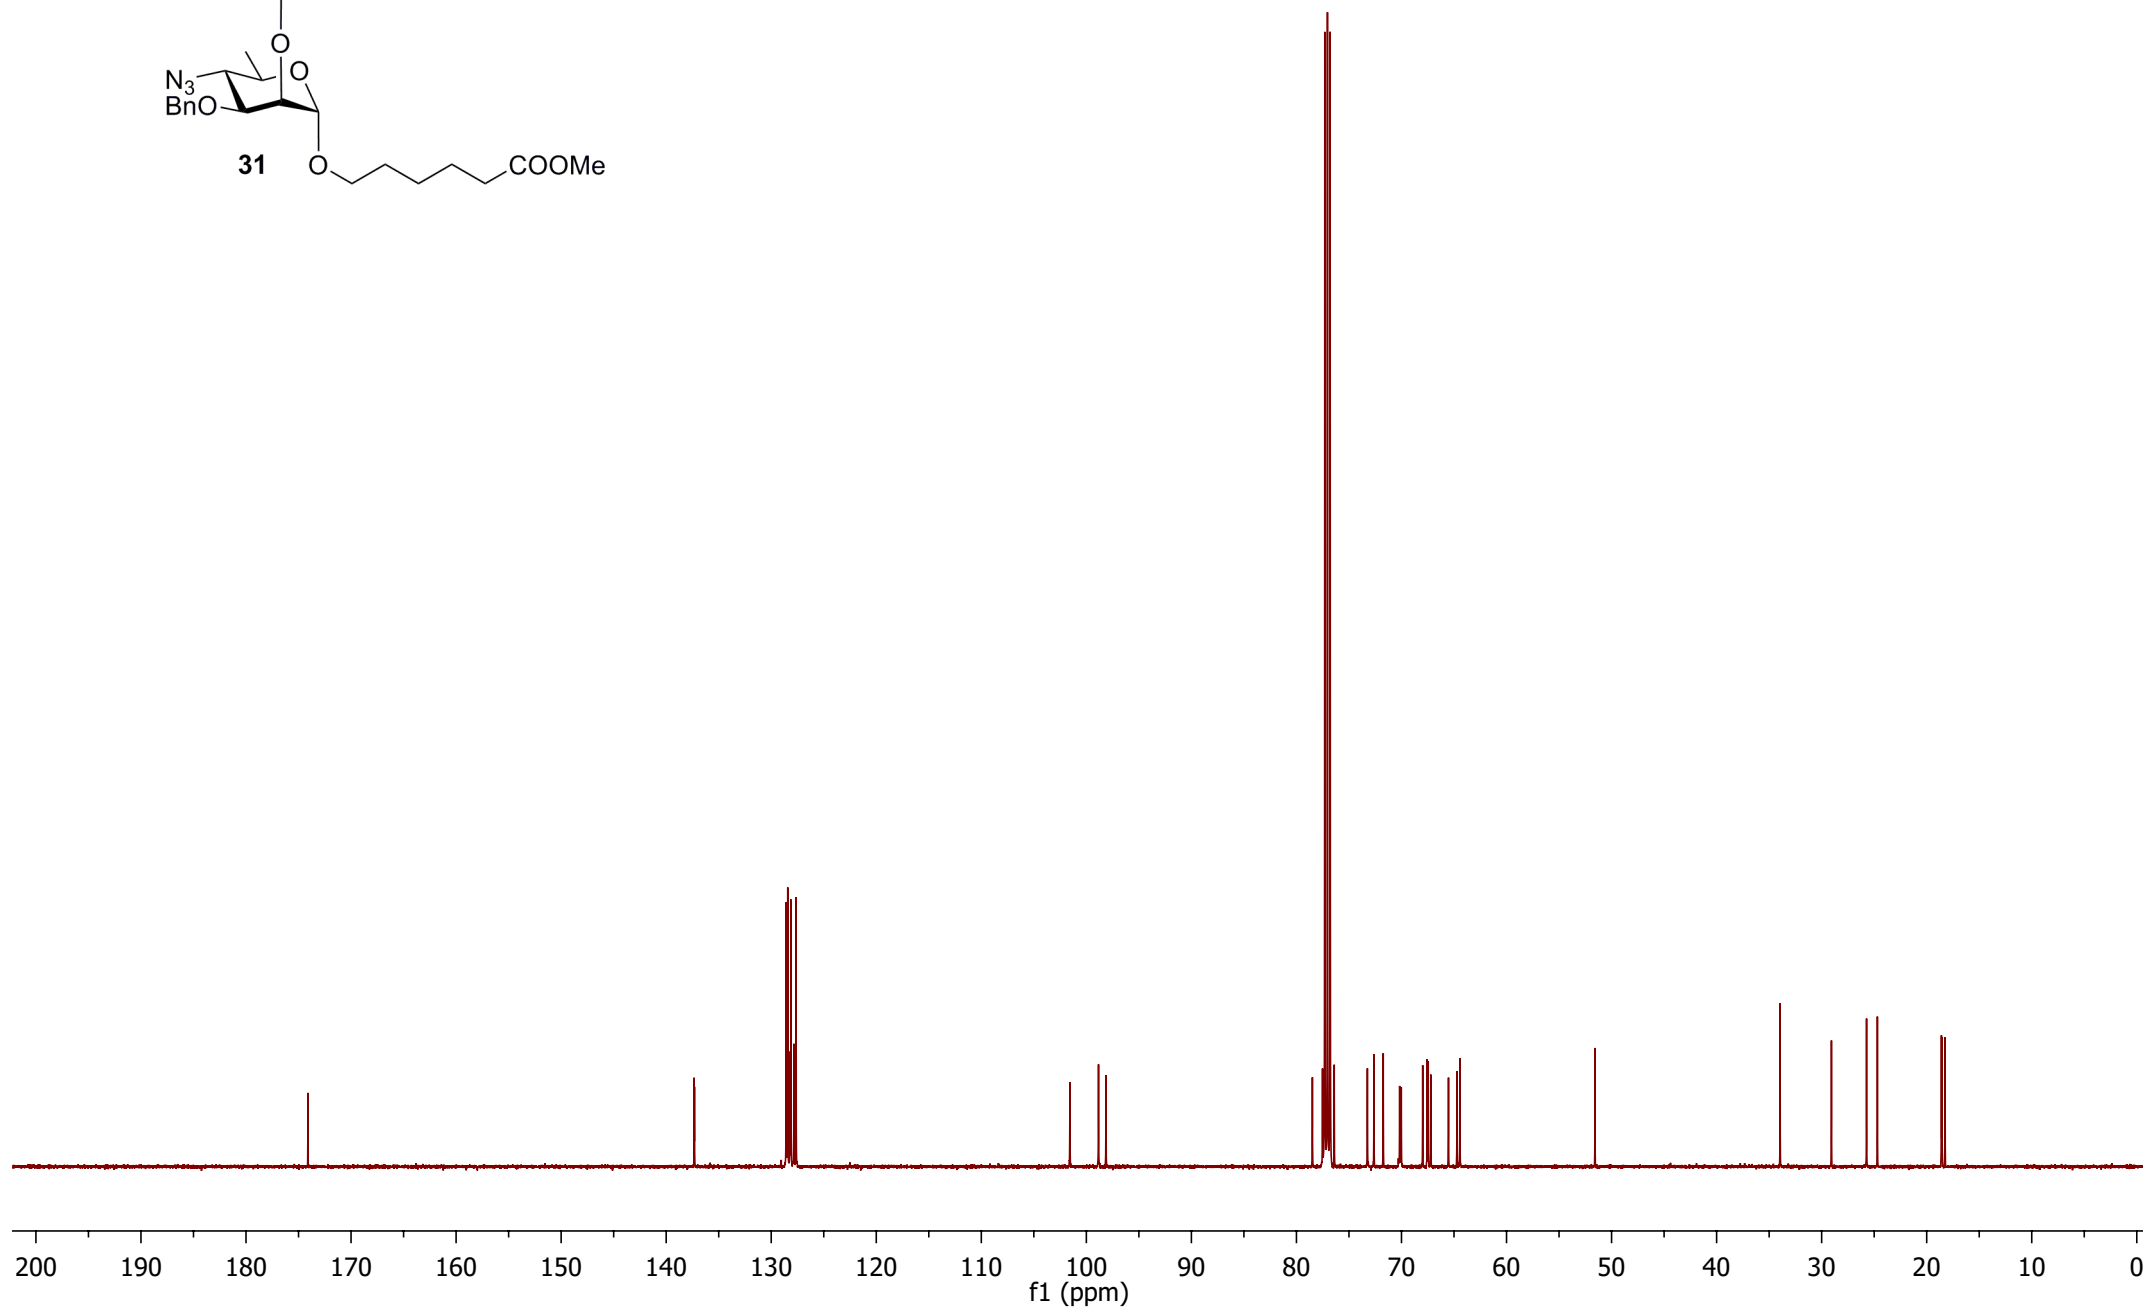



700 MHz, D<sub>2</sub>O

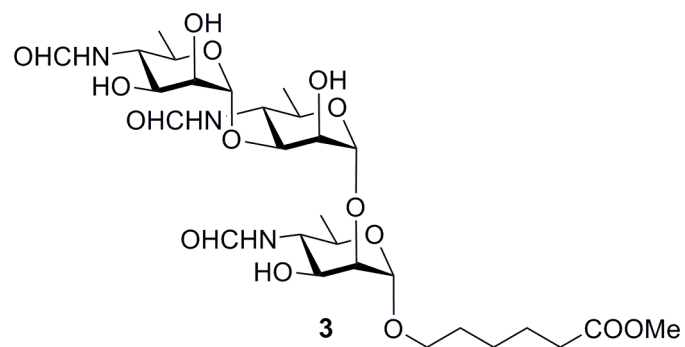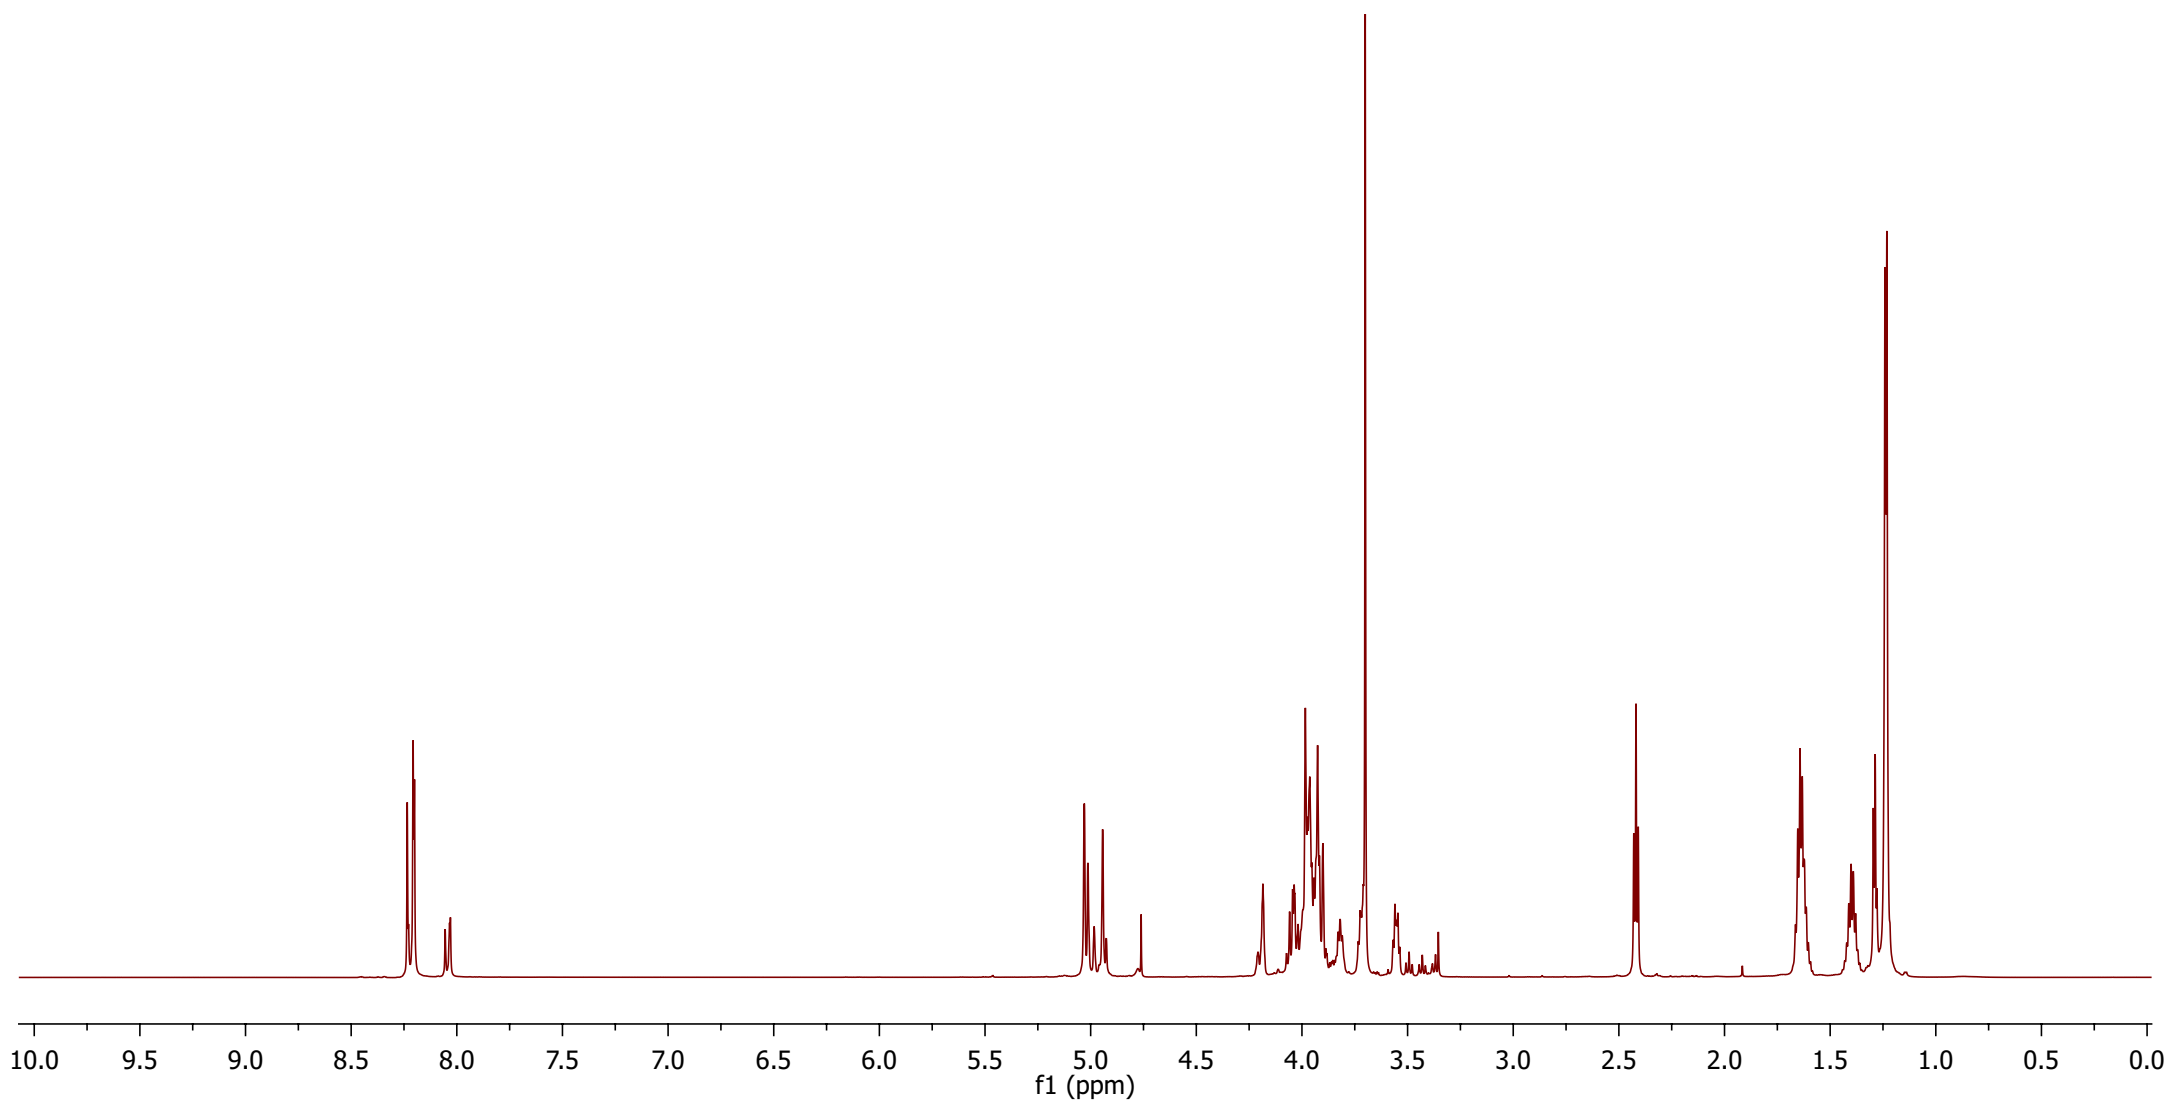

176 MHz, D<sub>2</sub>O

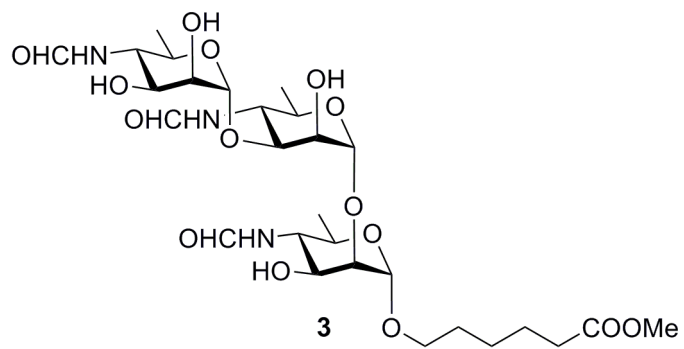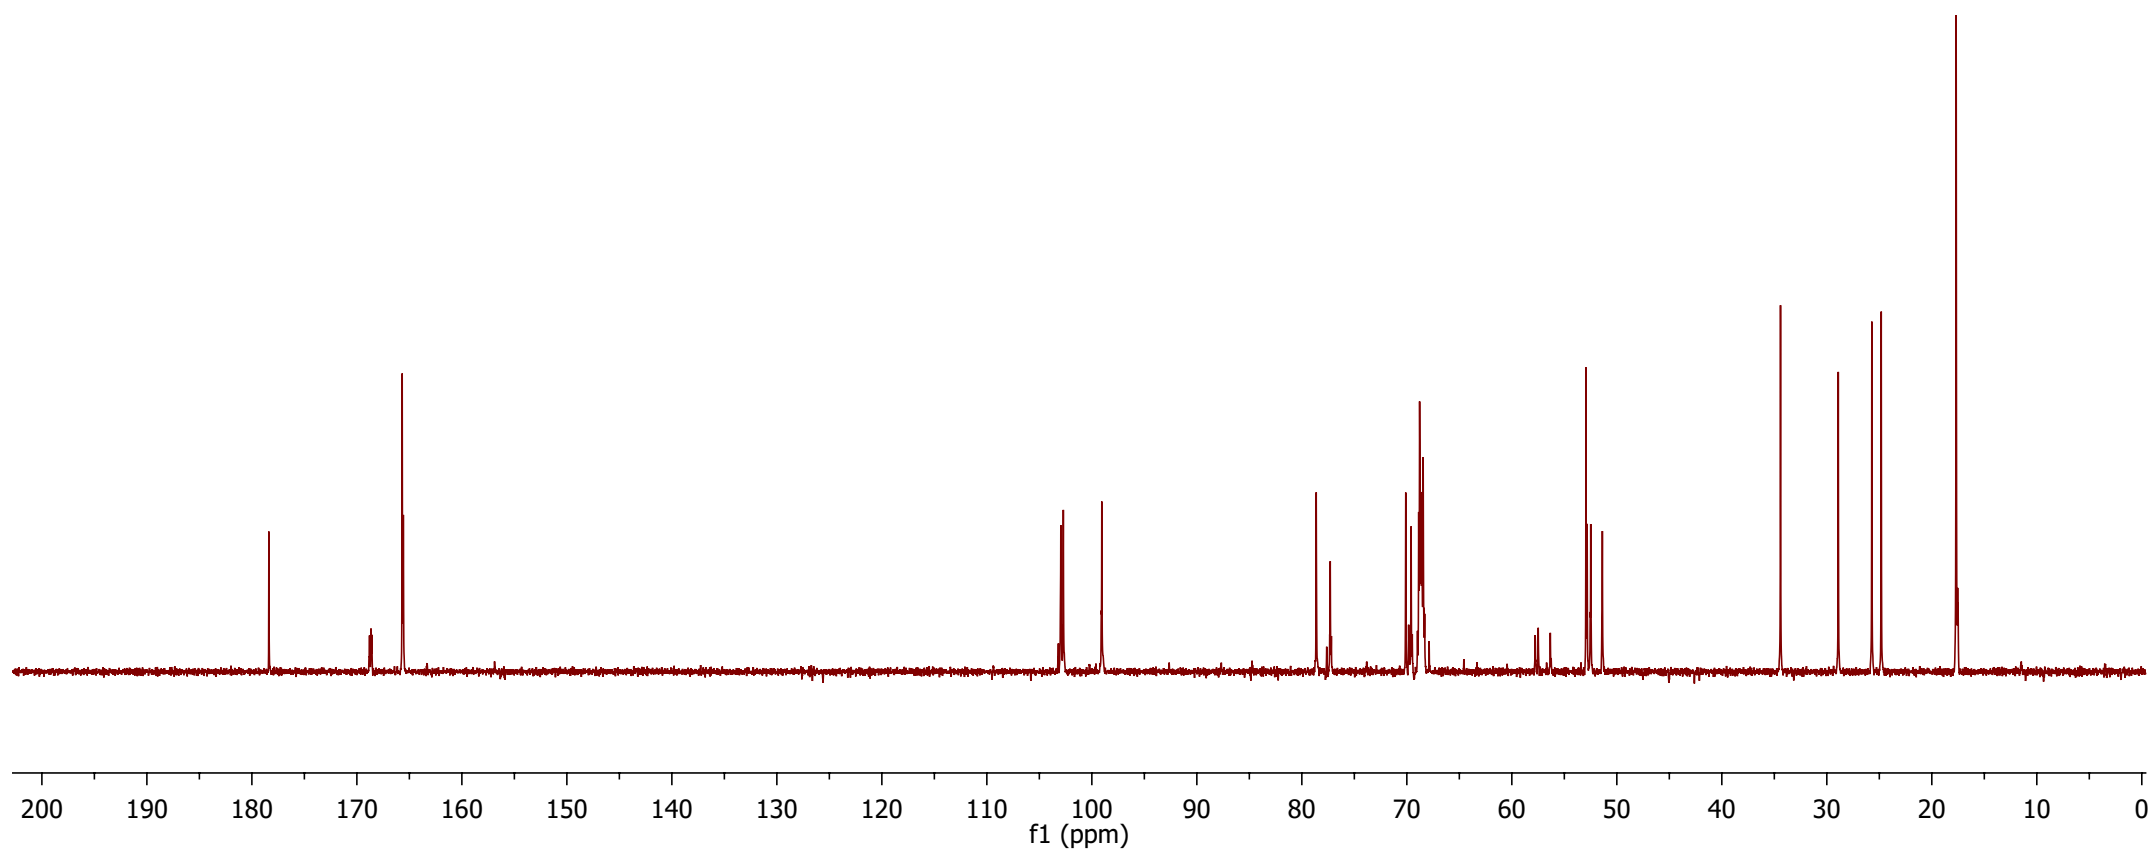

500 MHz, CDCl<sub>3</sub>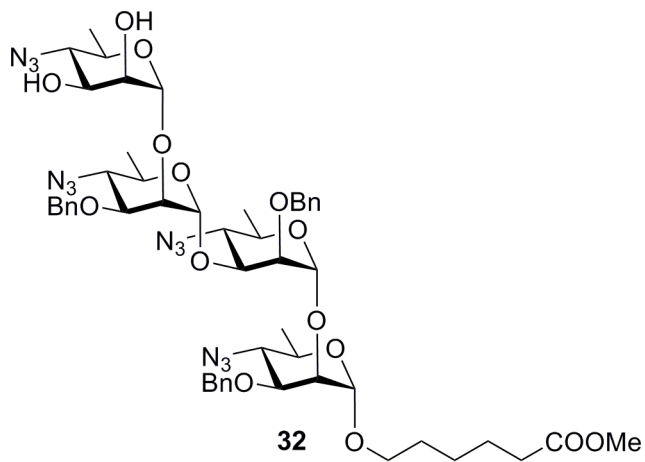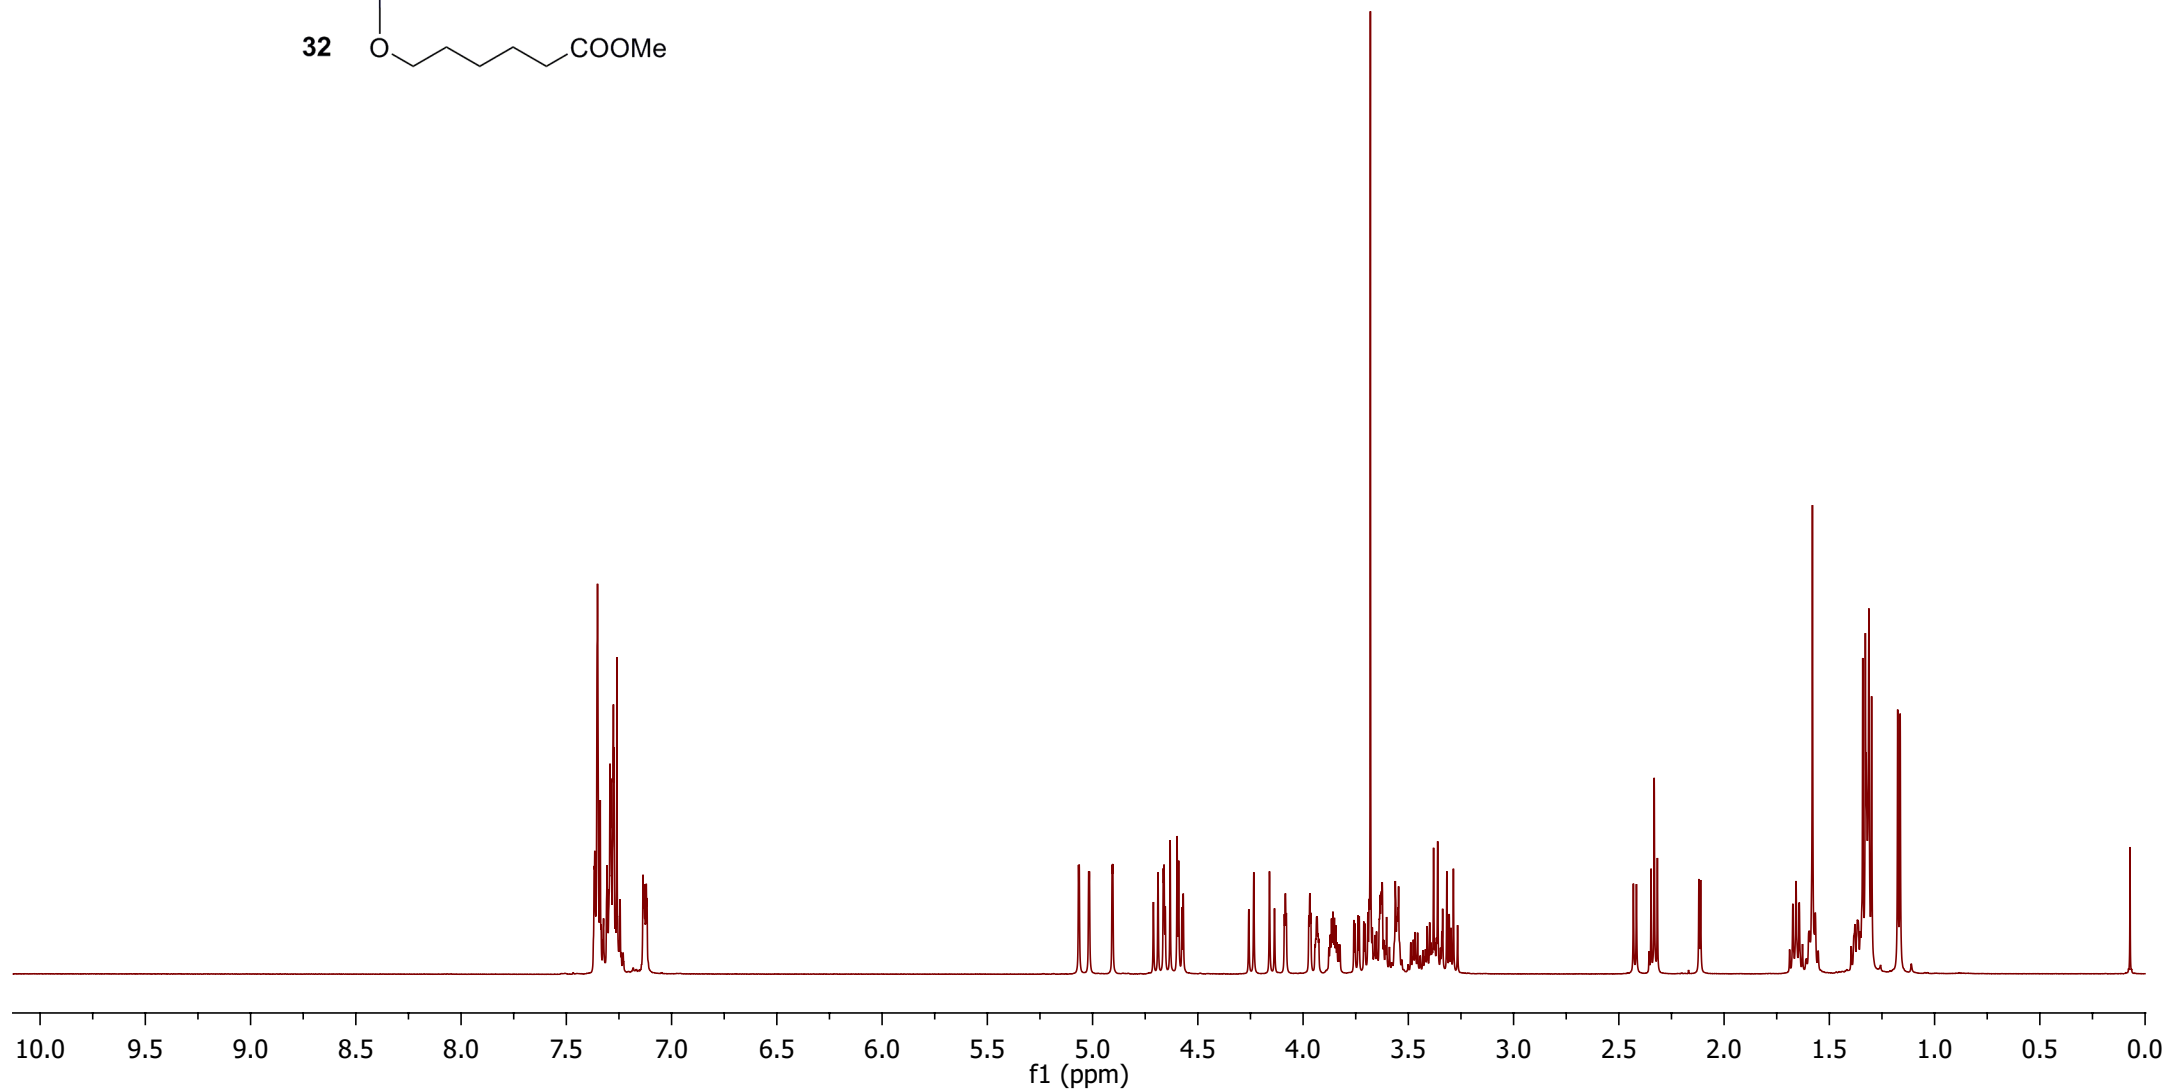

126 MHz, CDCl<sub>3</sub>

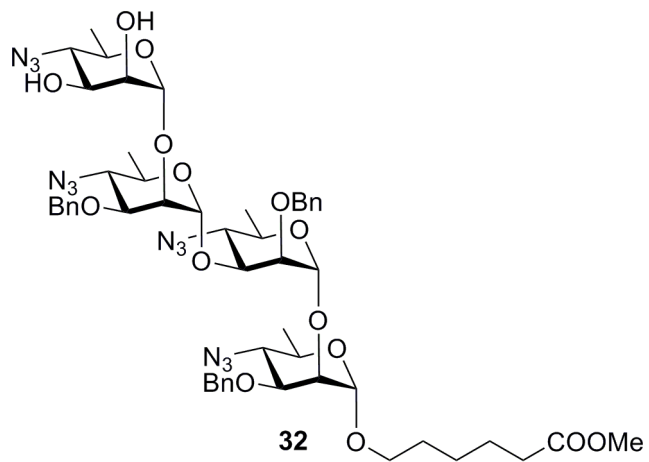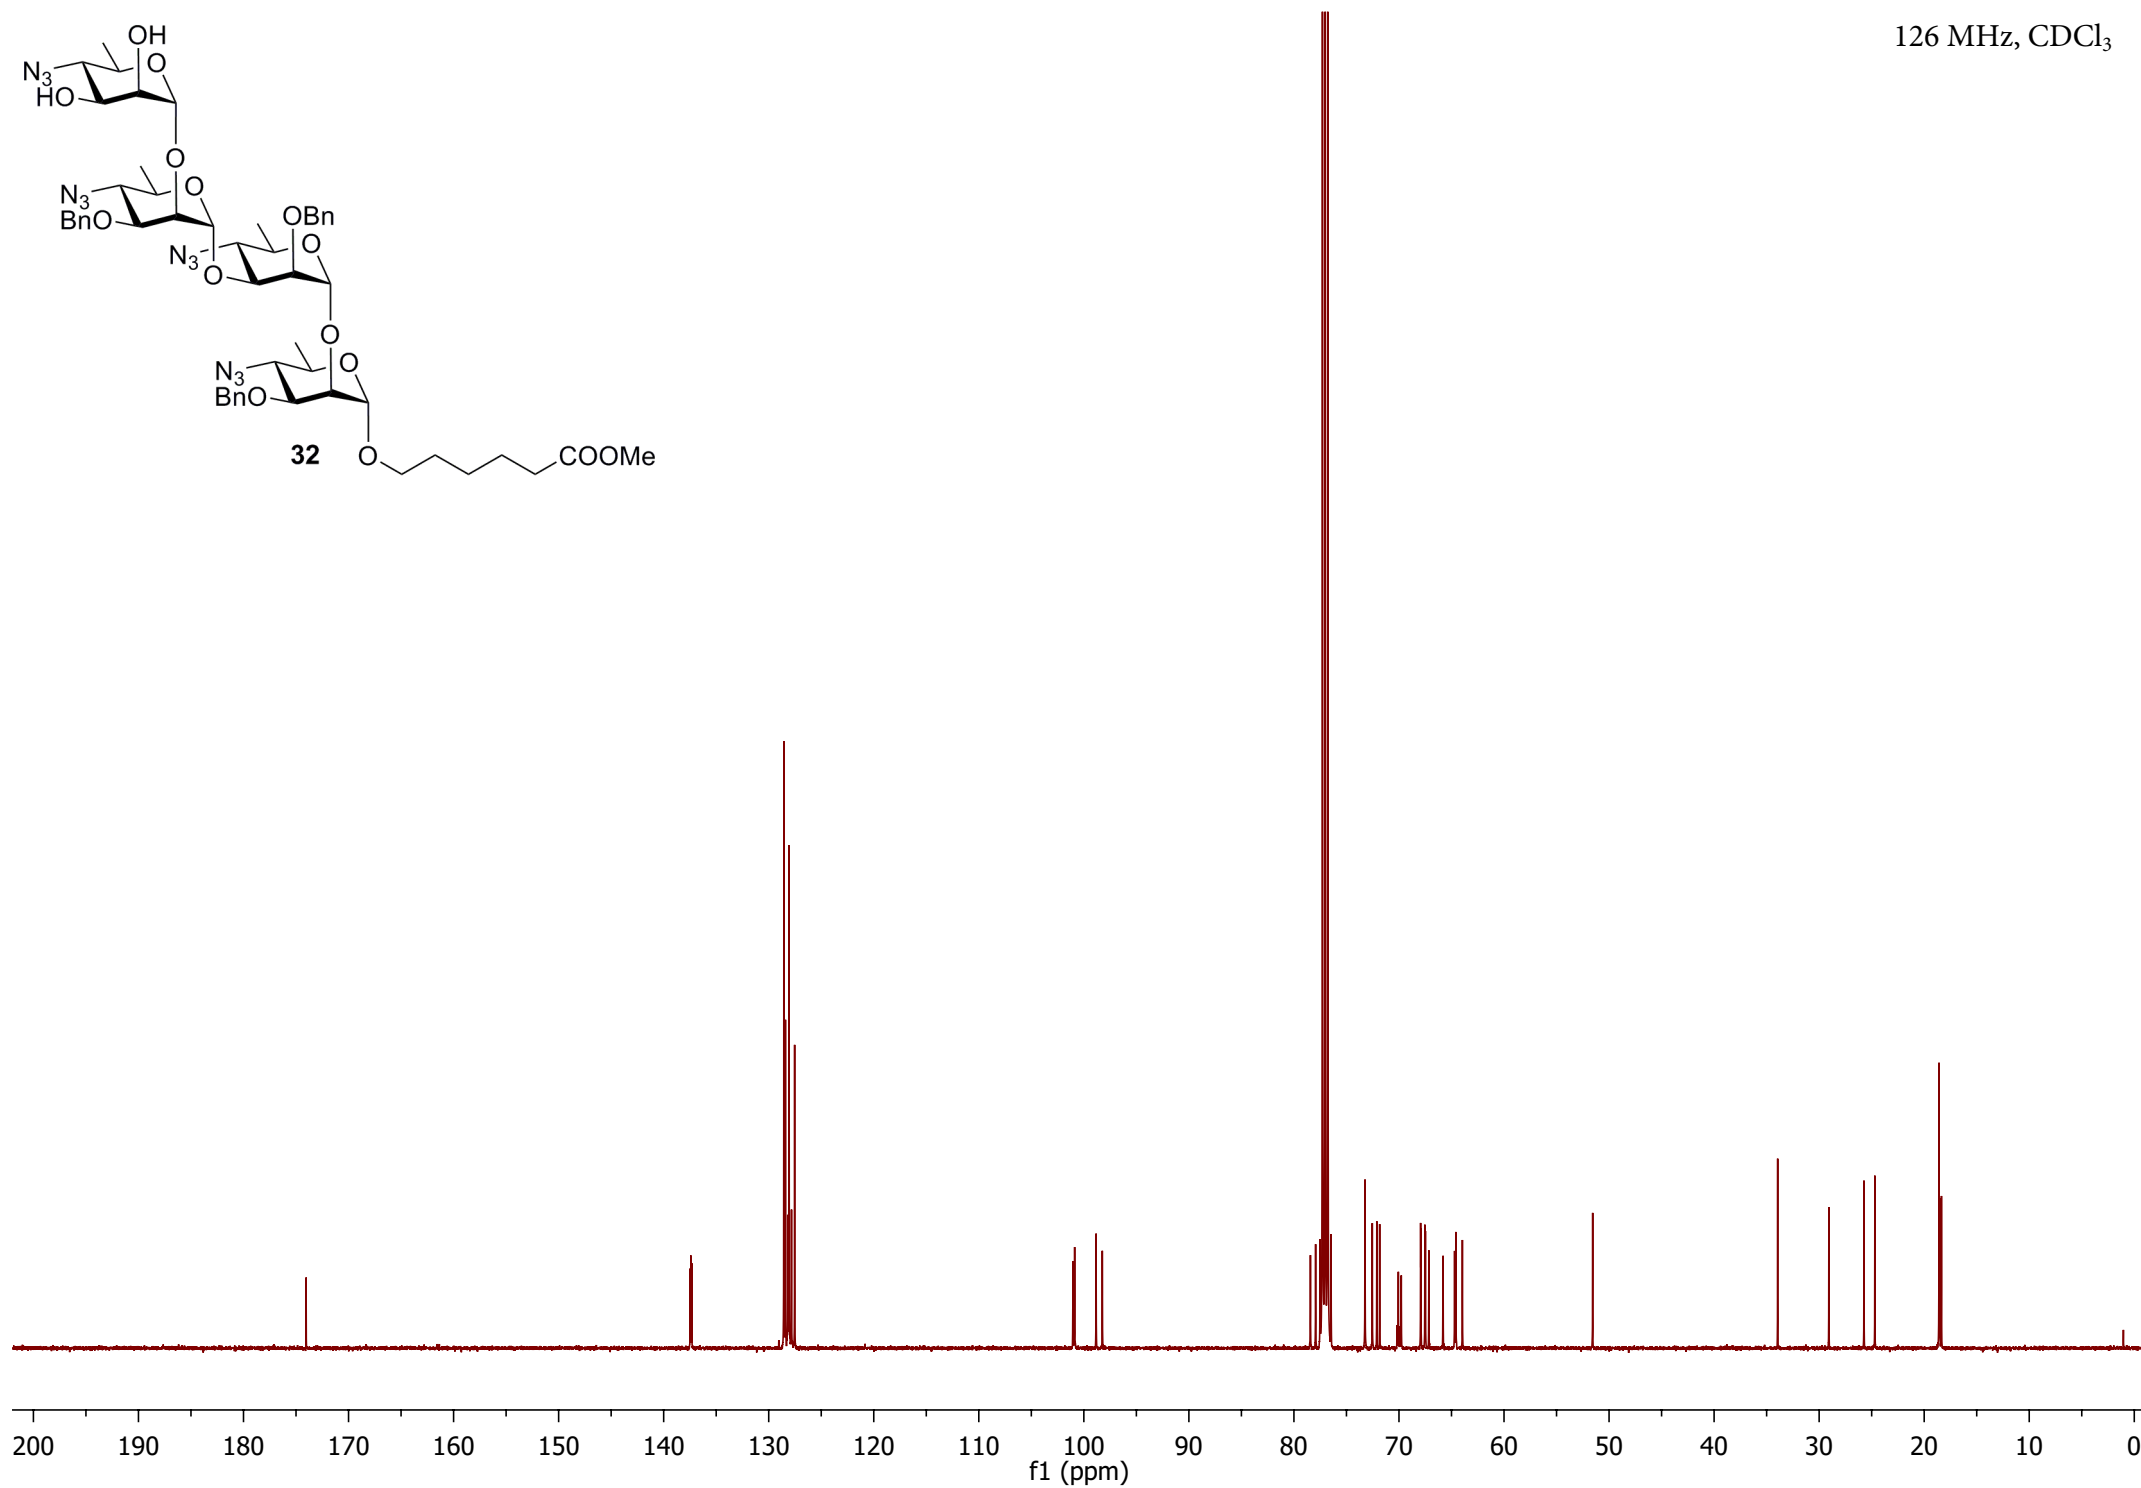

500 MHz, D<sub>2</sub>O

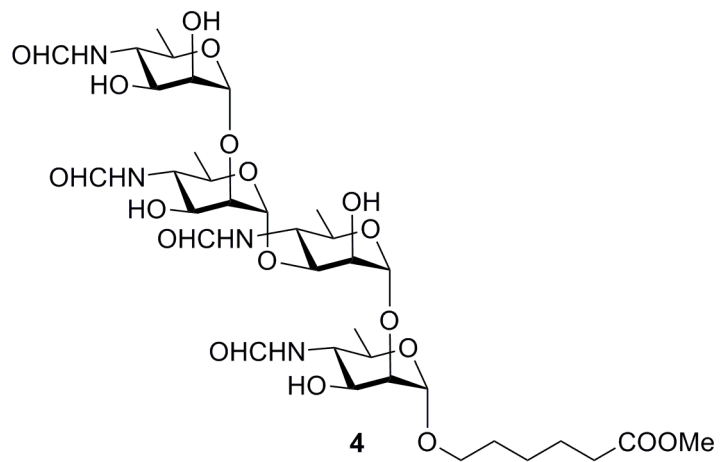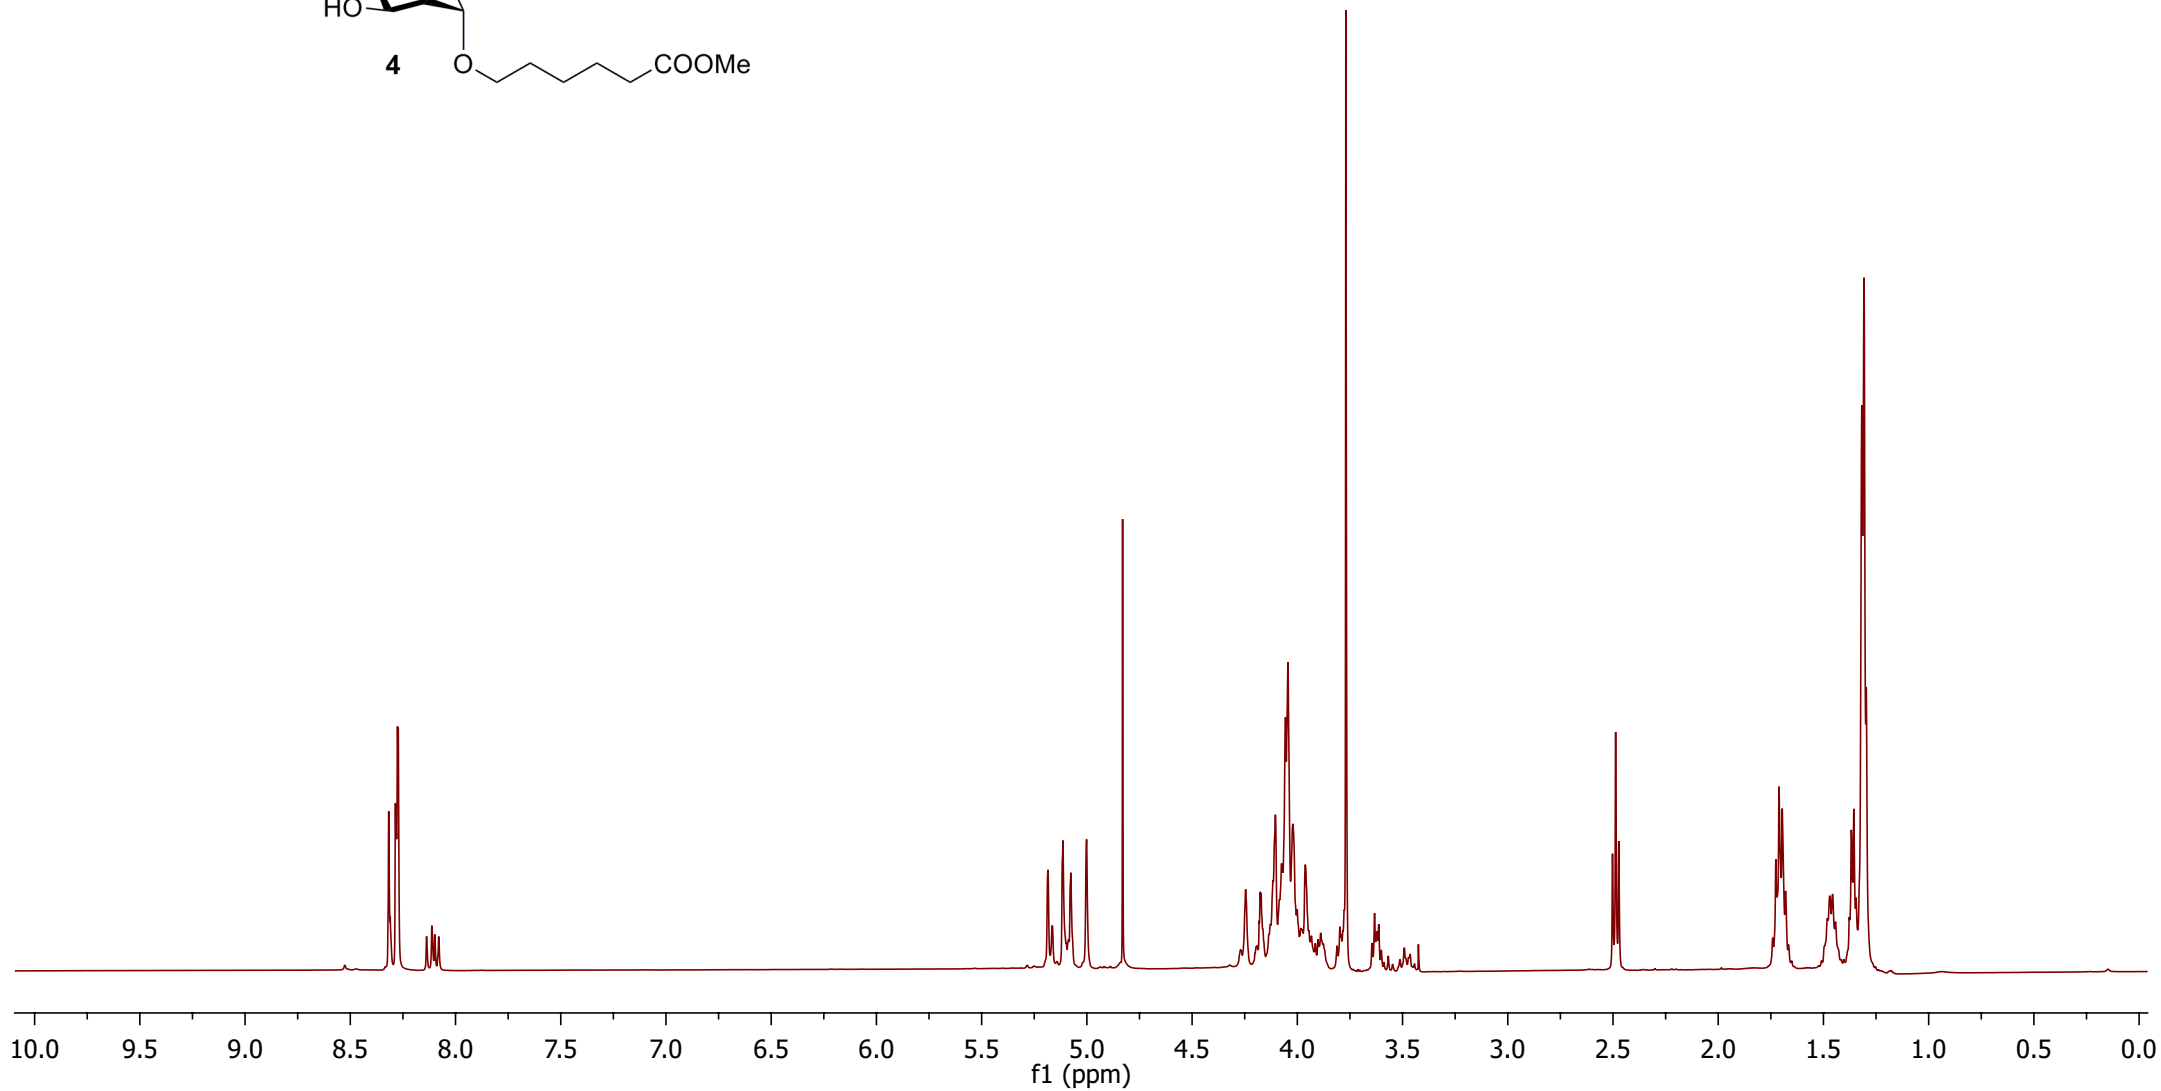

126 MHz, D<sub>2</sub>O

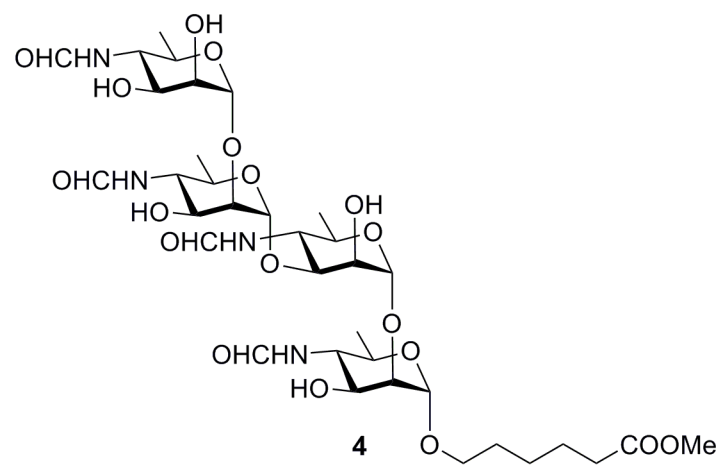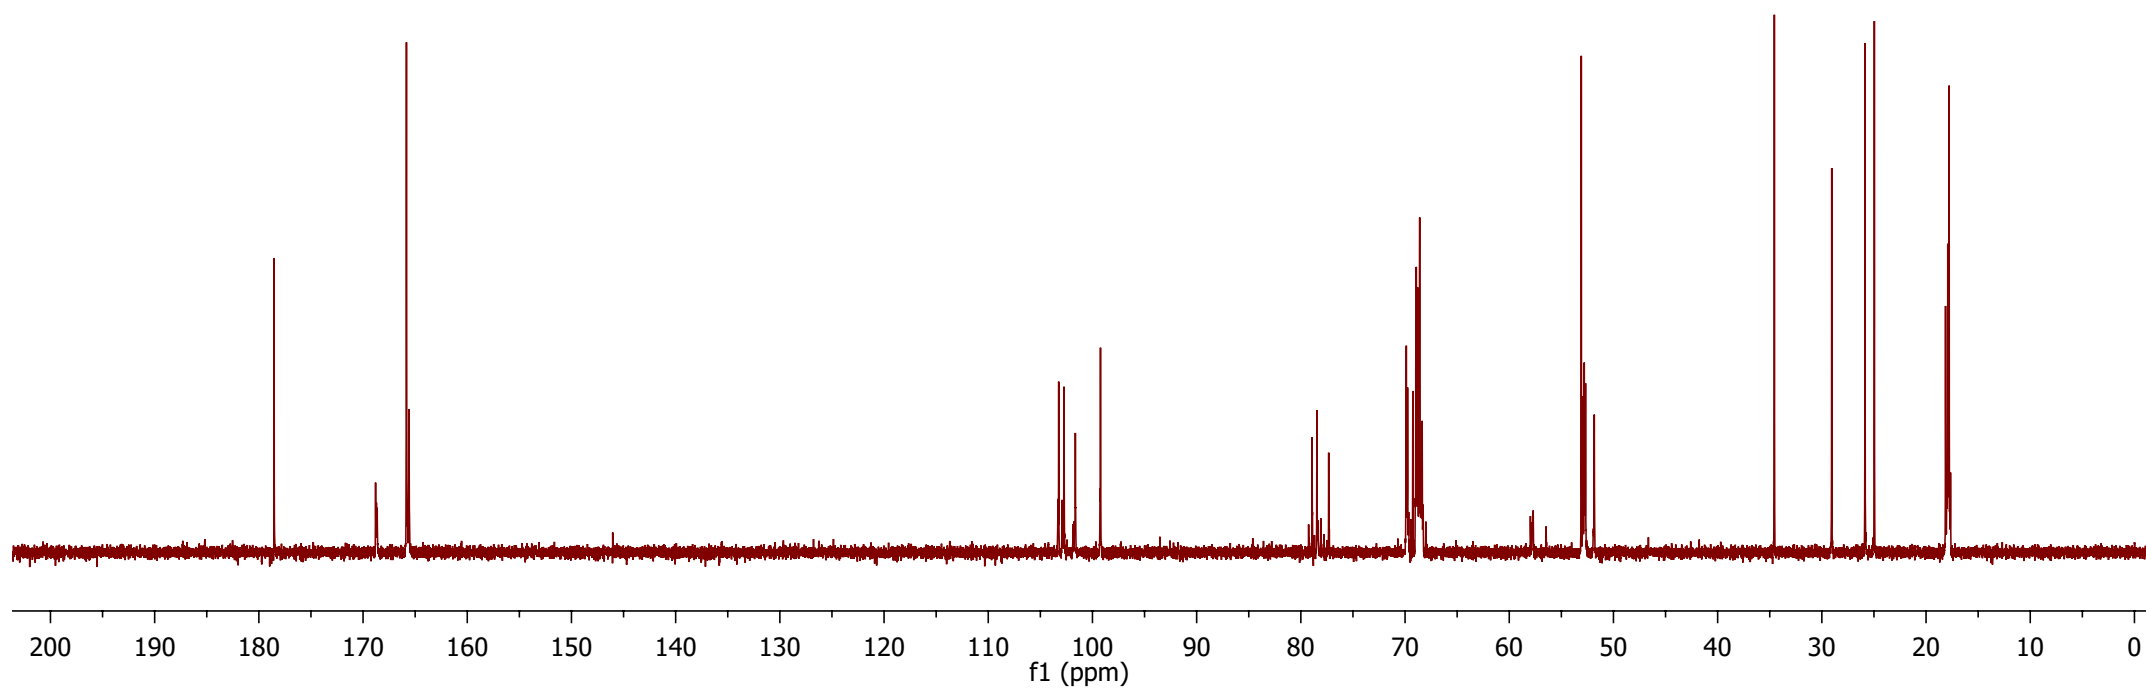

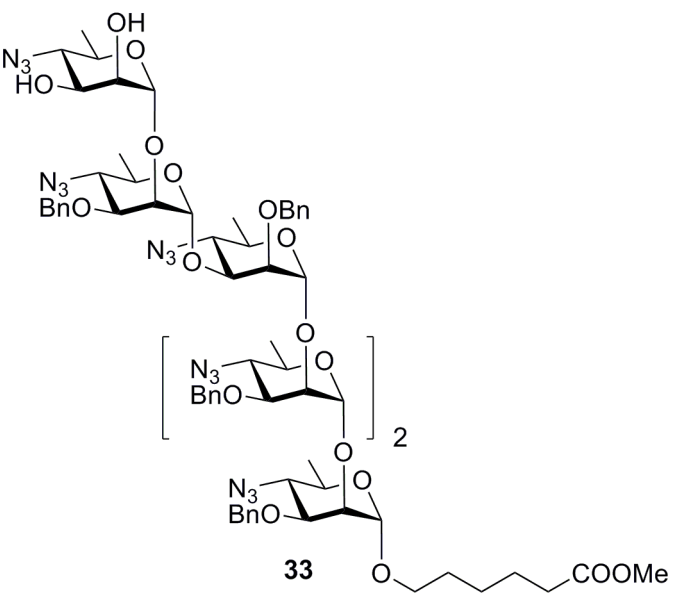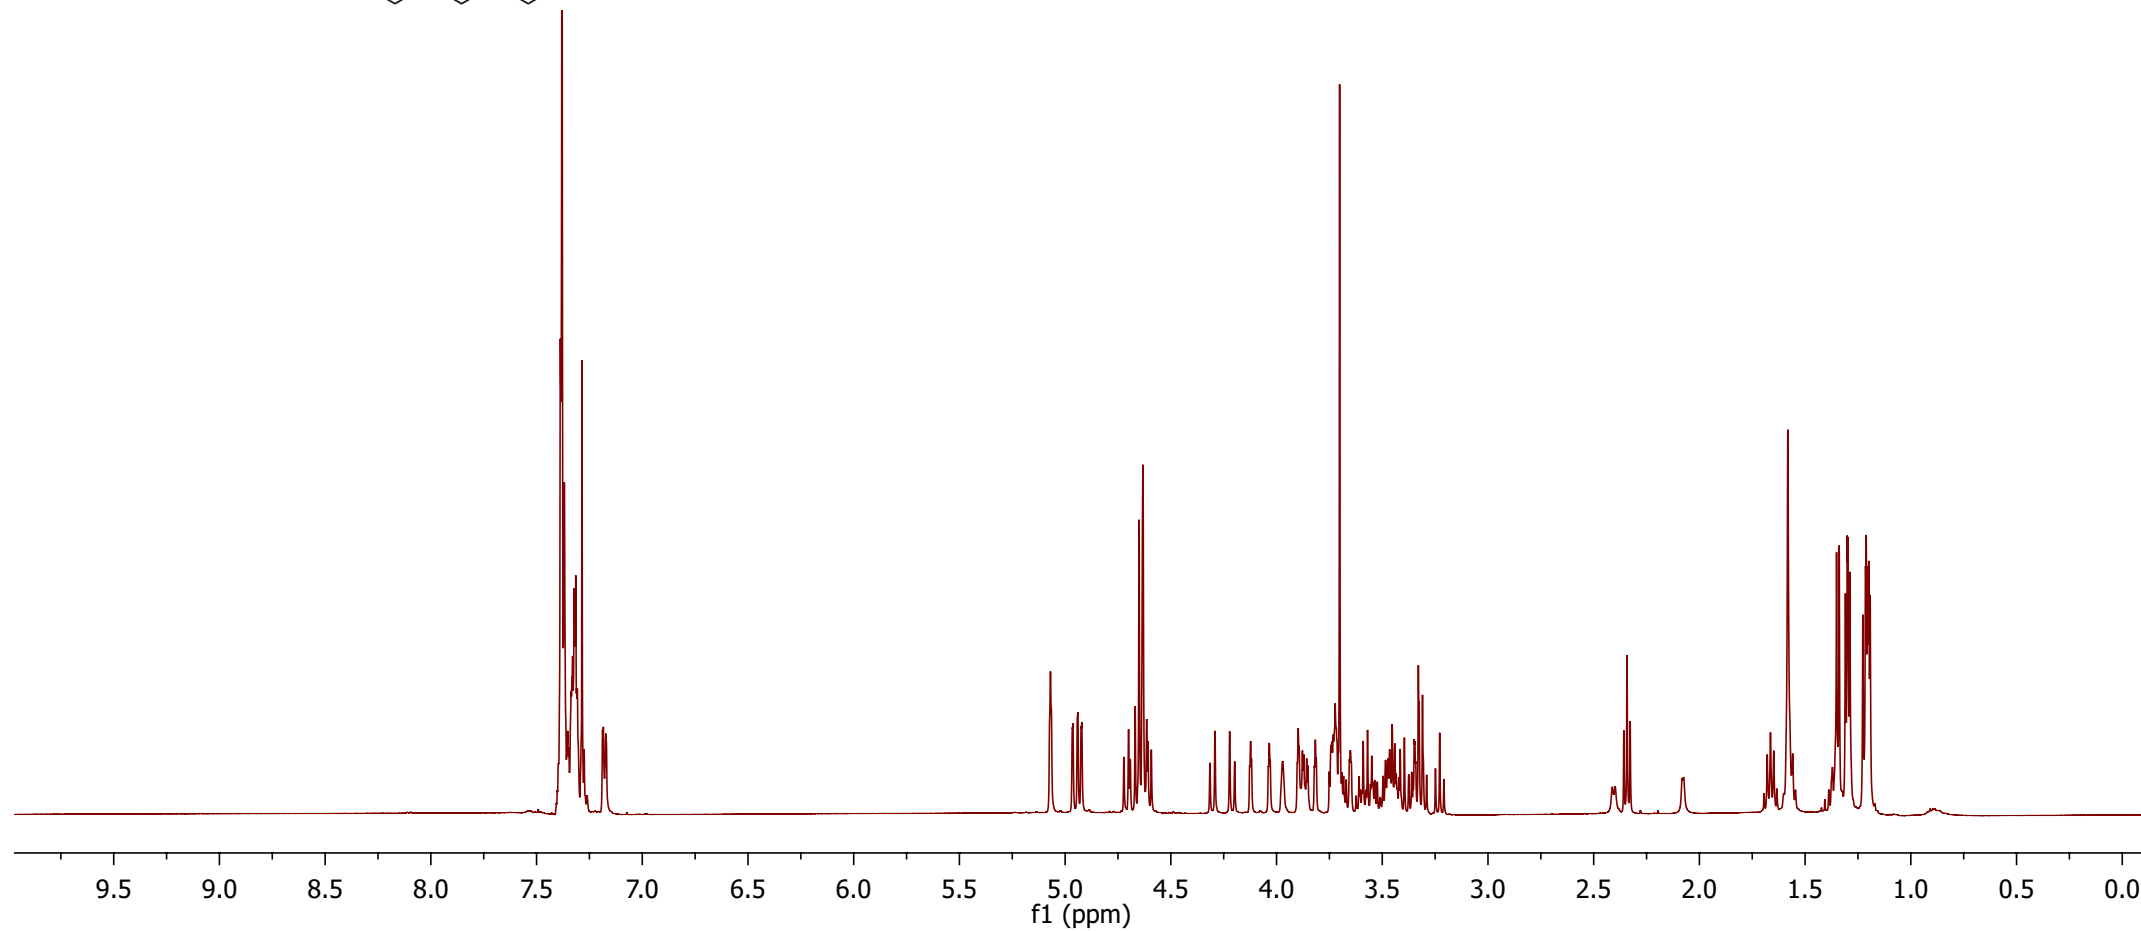

126 MHz, CDCl<sub>3</sub>

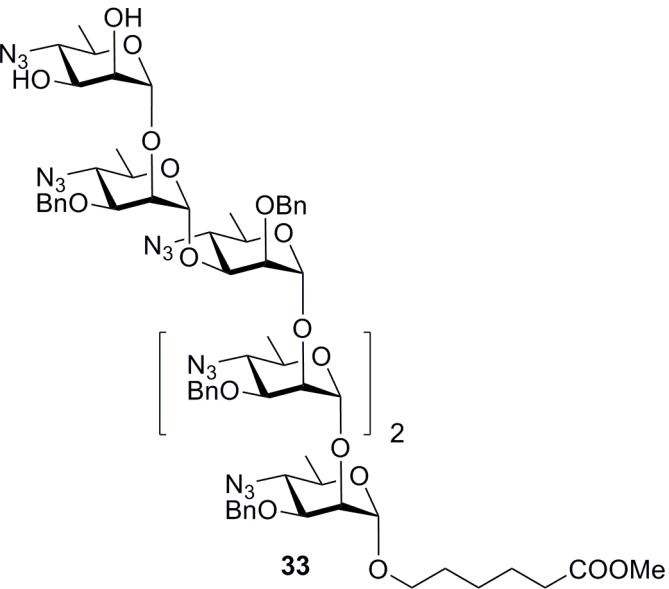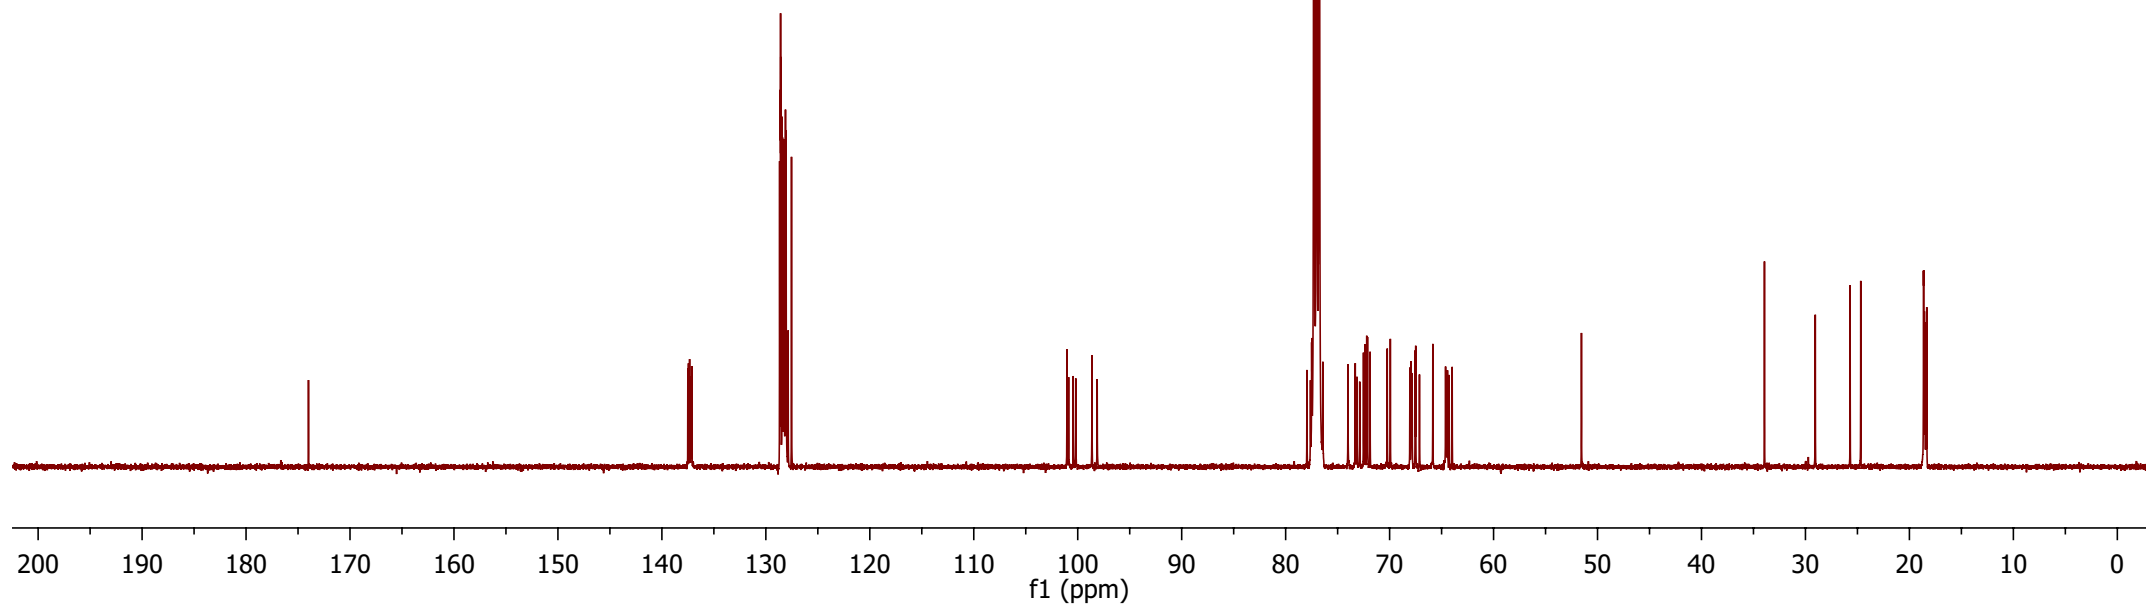



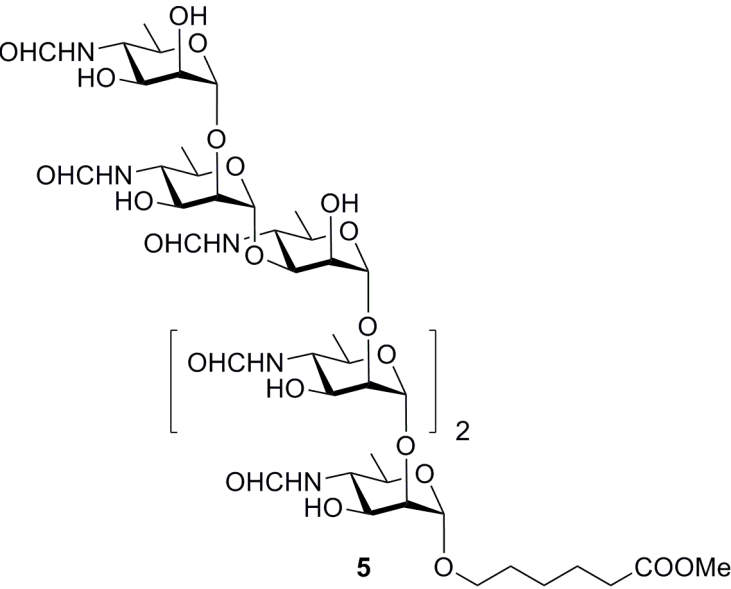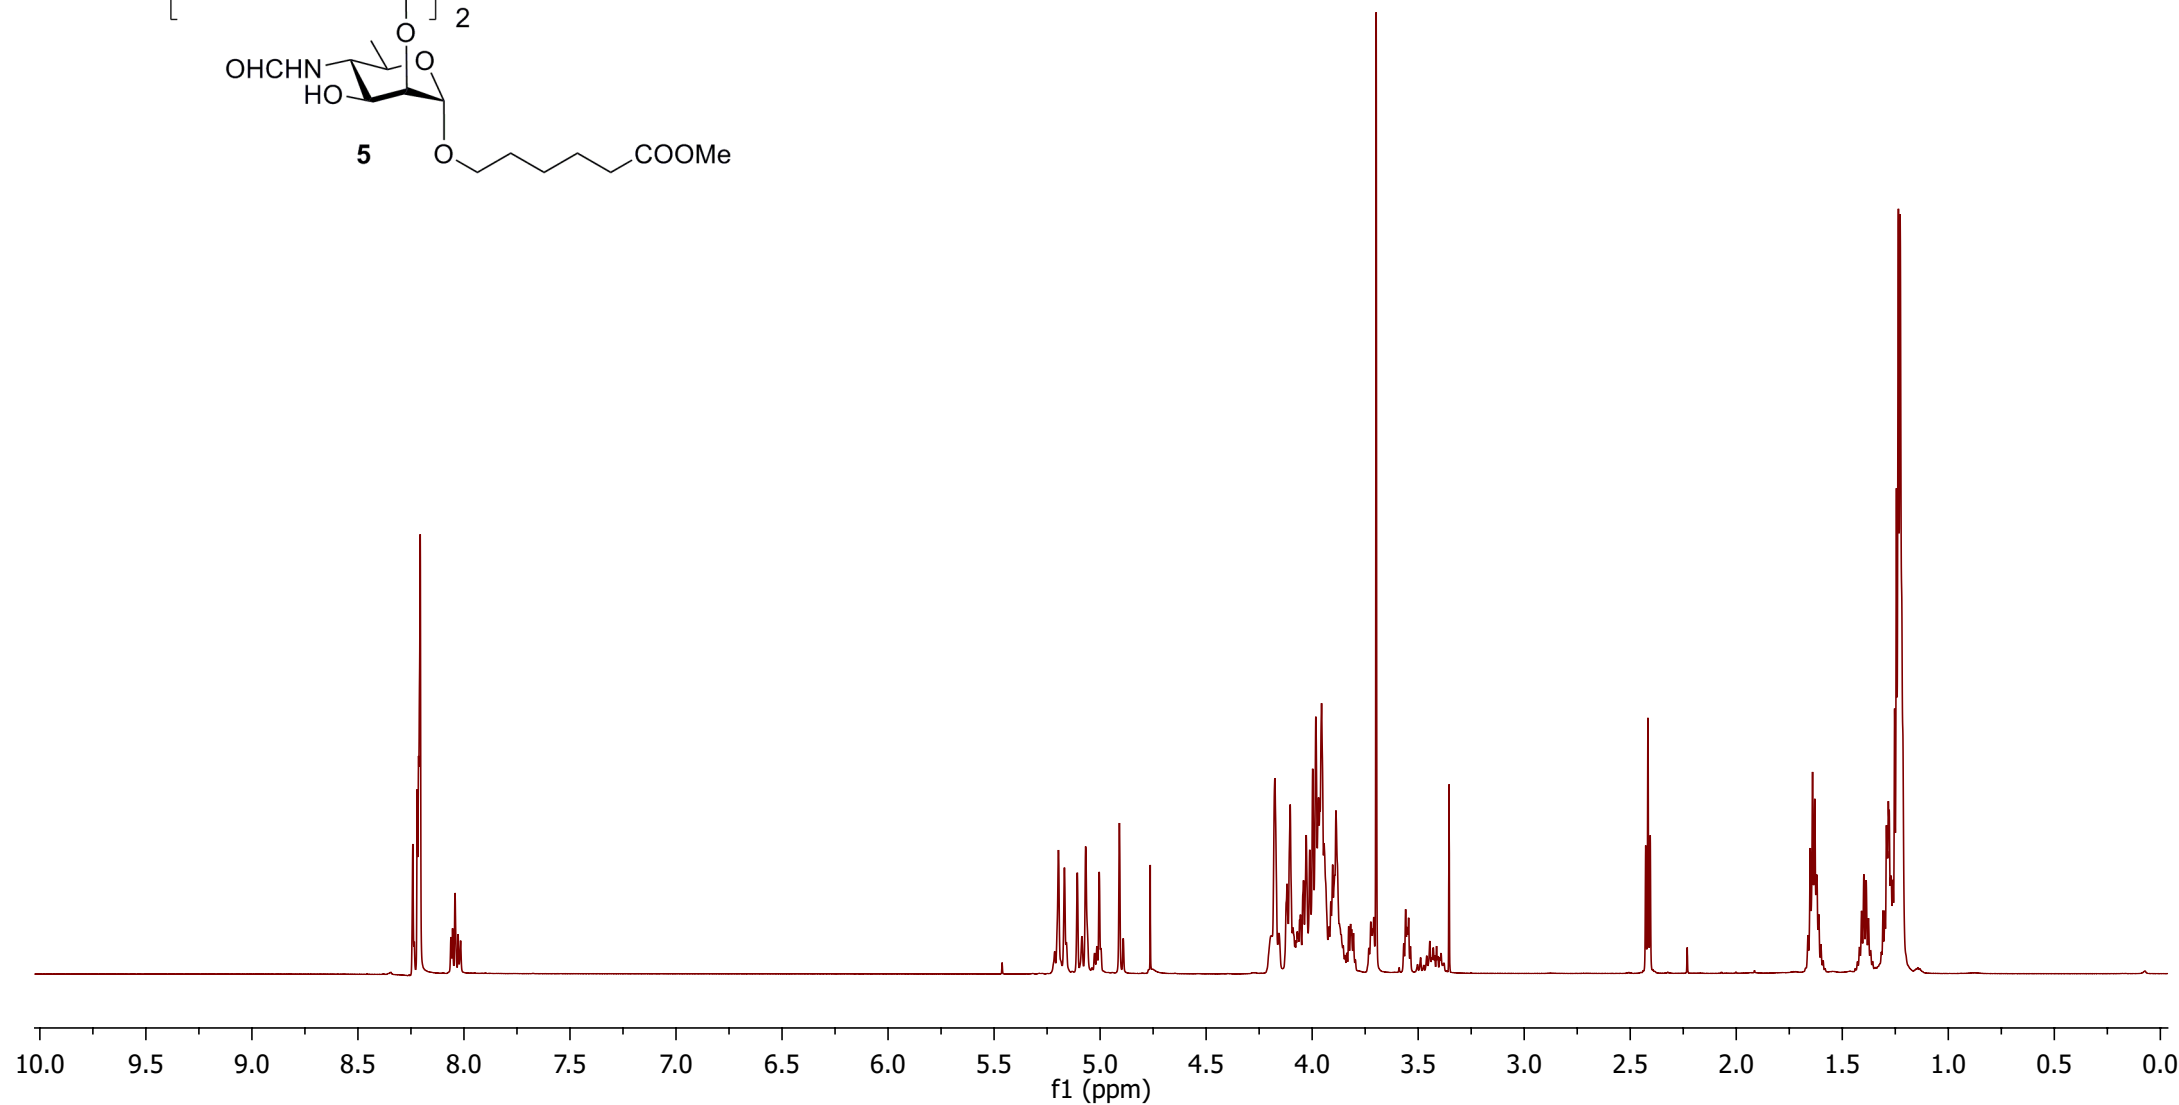

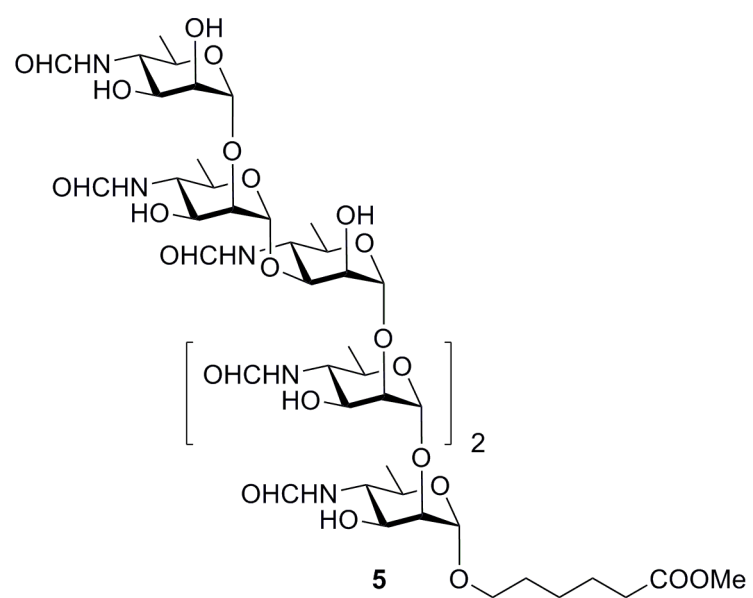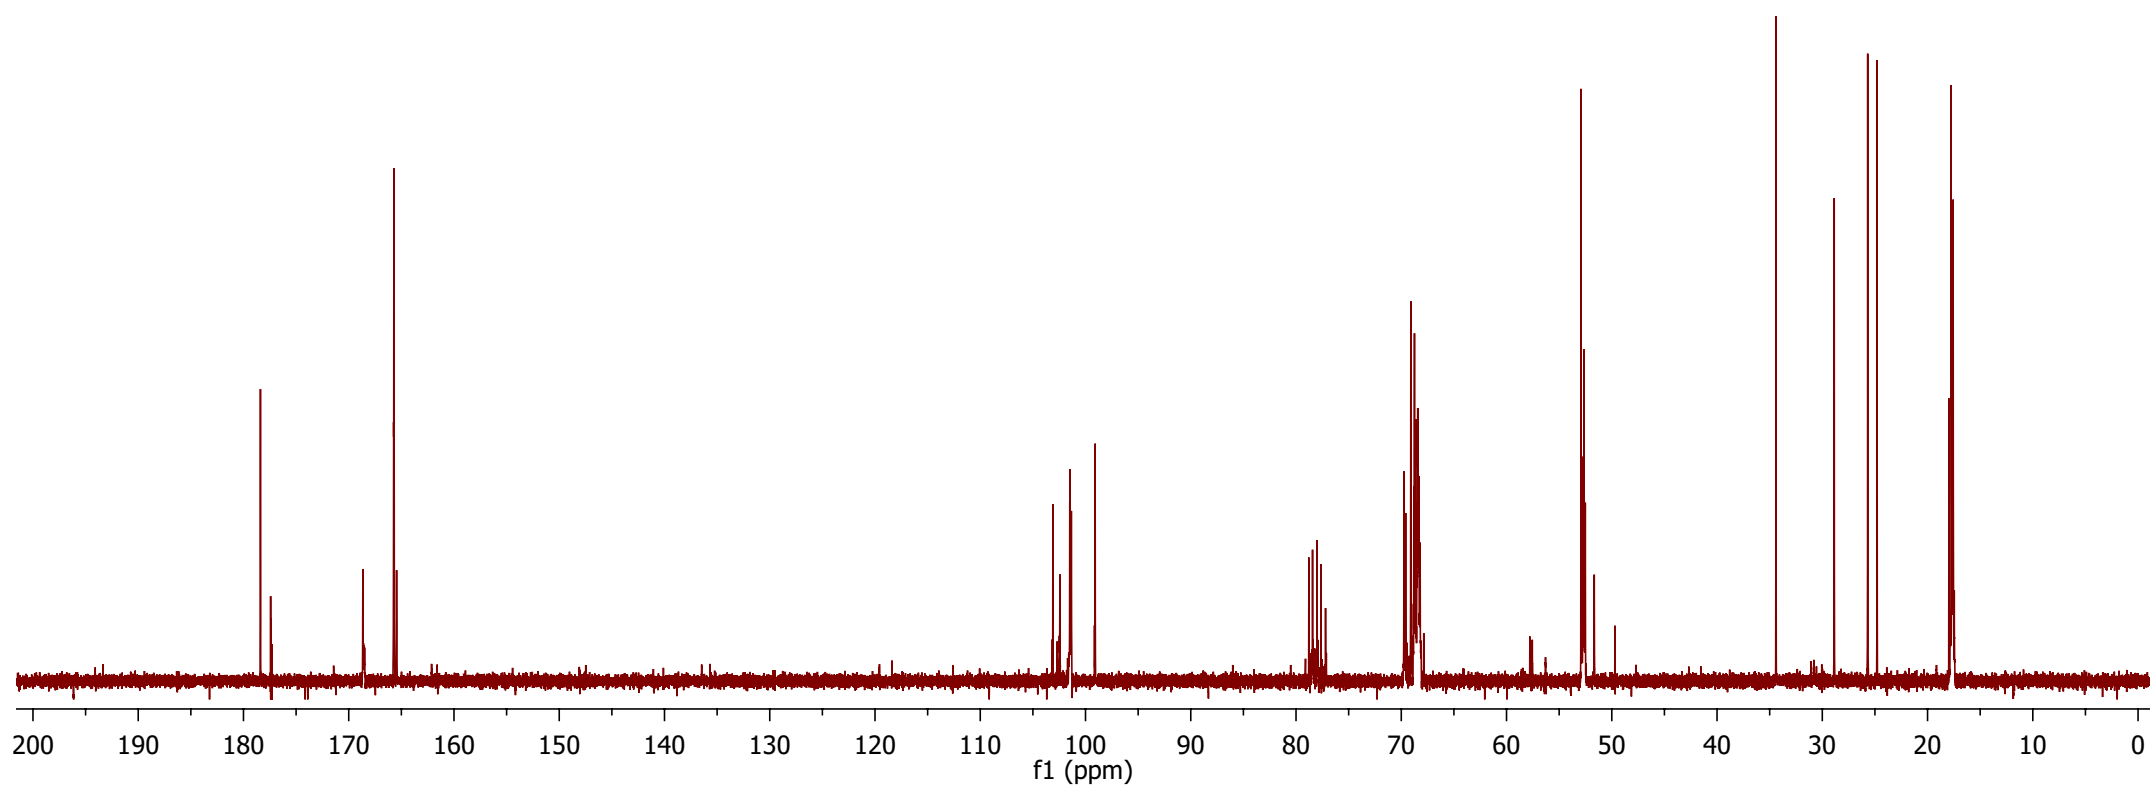

500 MHz, CDCl<sub>3</sub>

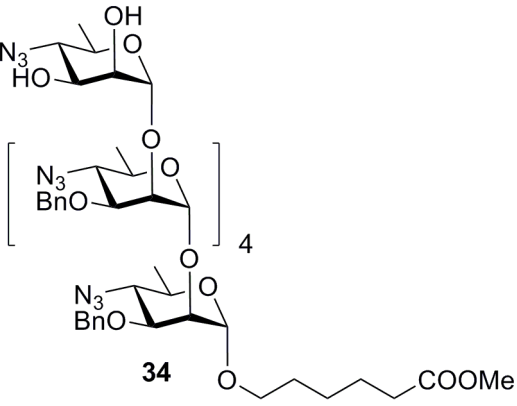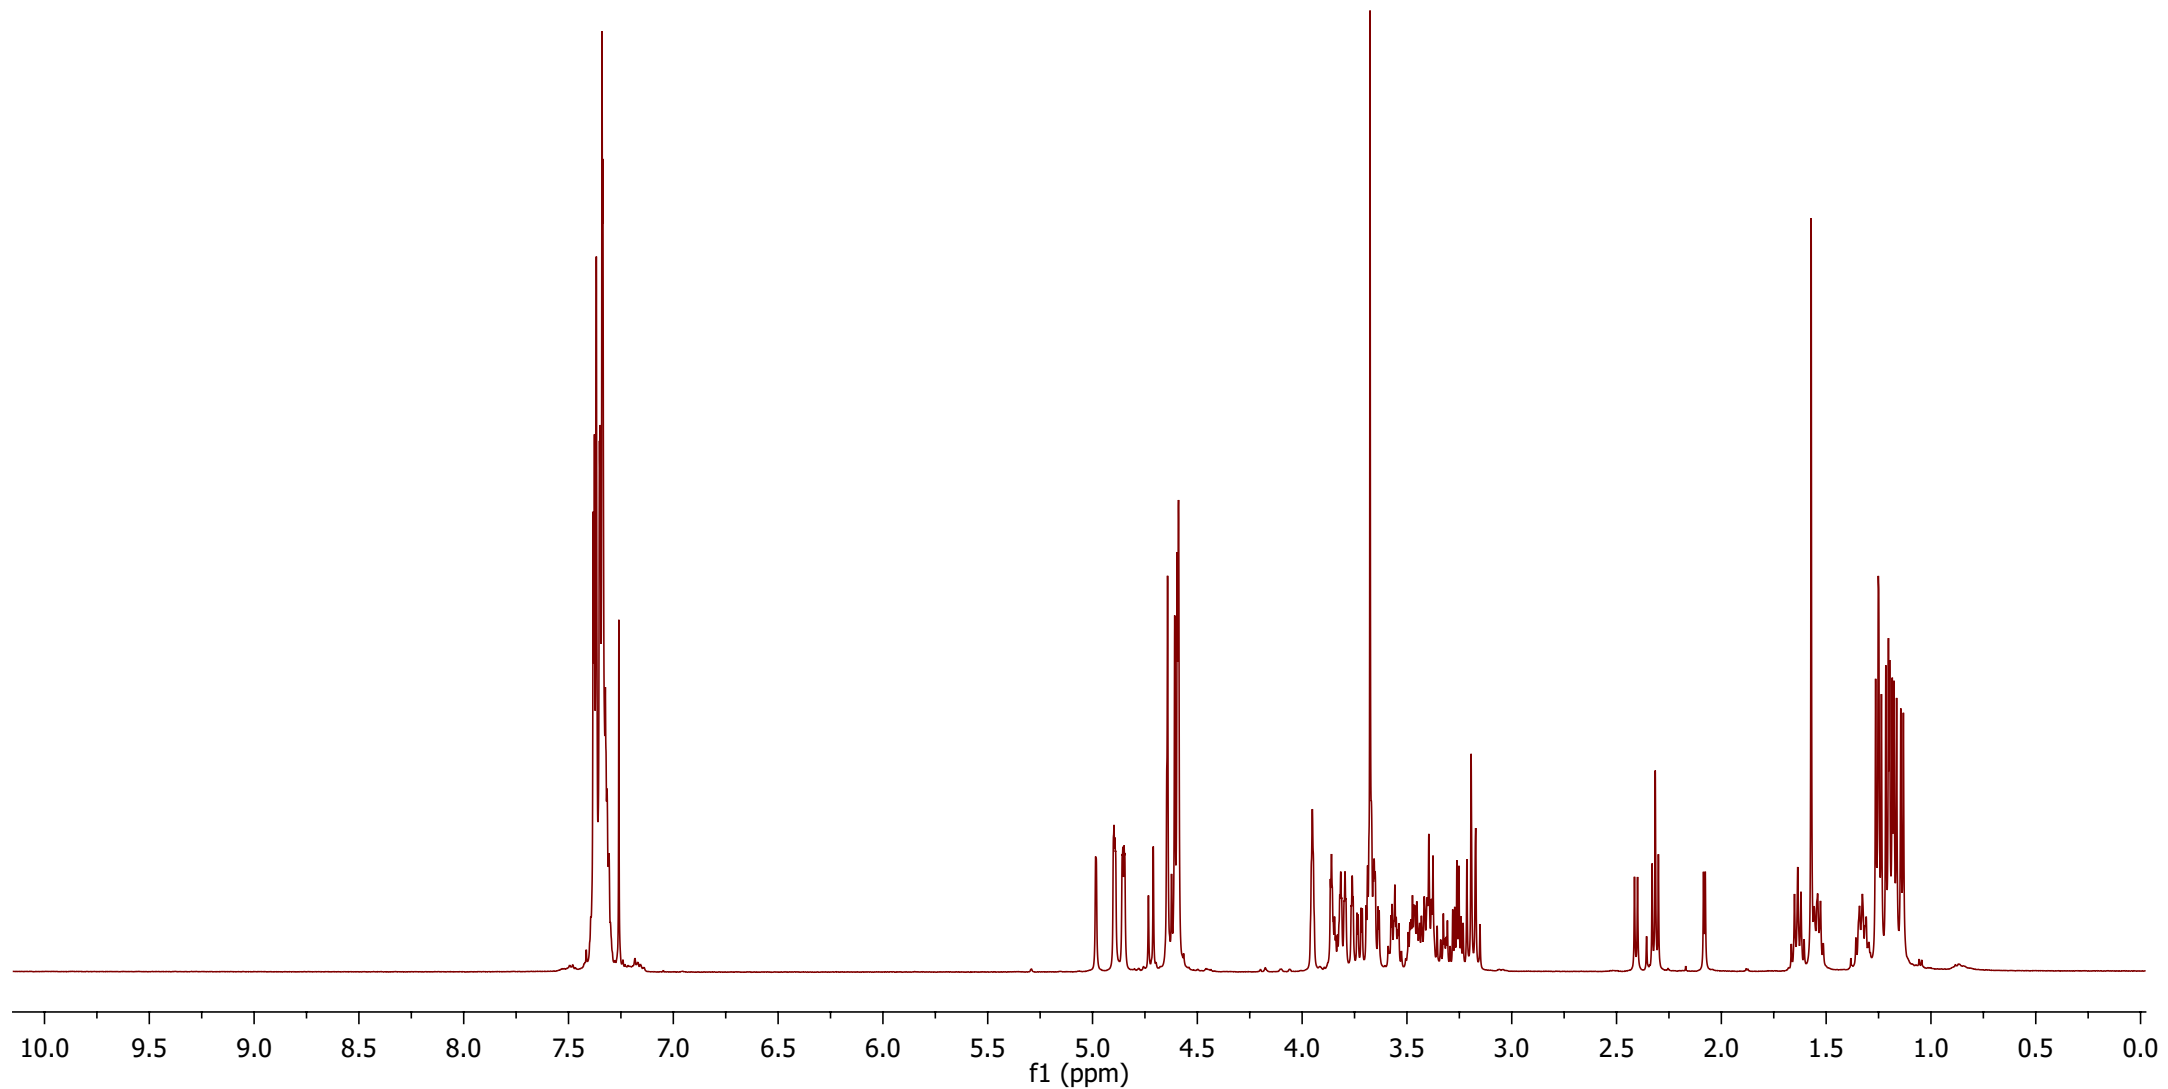

126 MHz, CDCl<sub>3</sub>

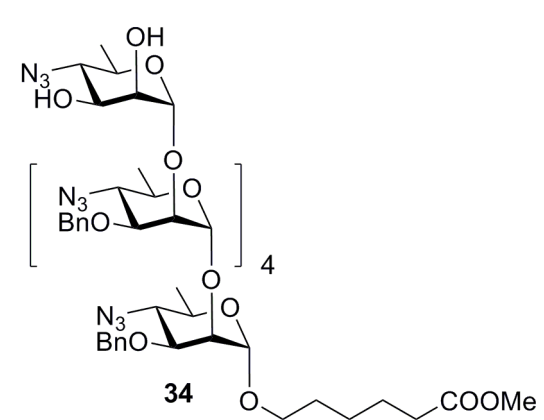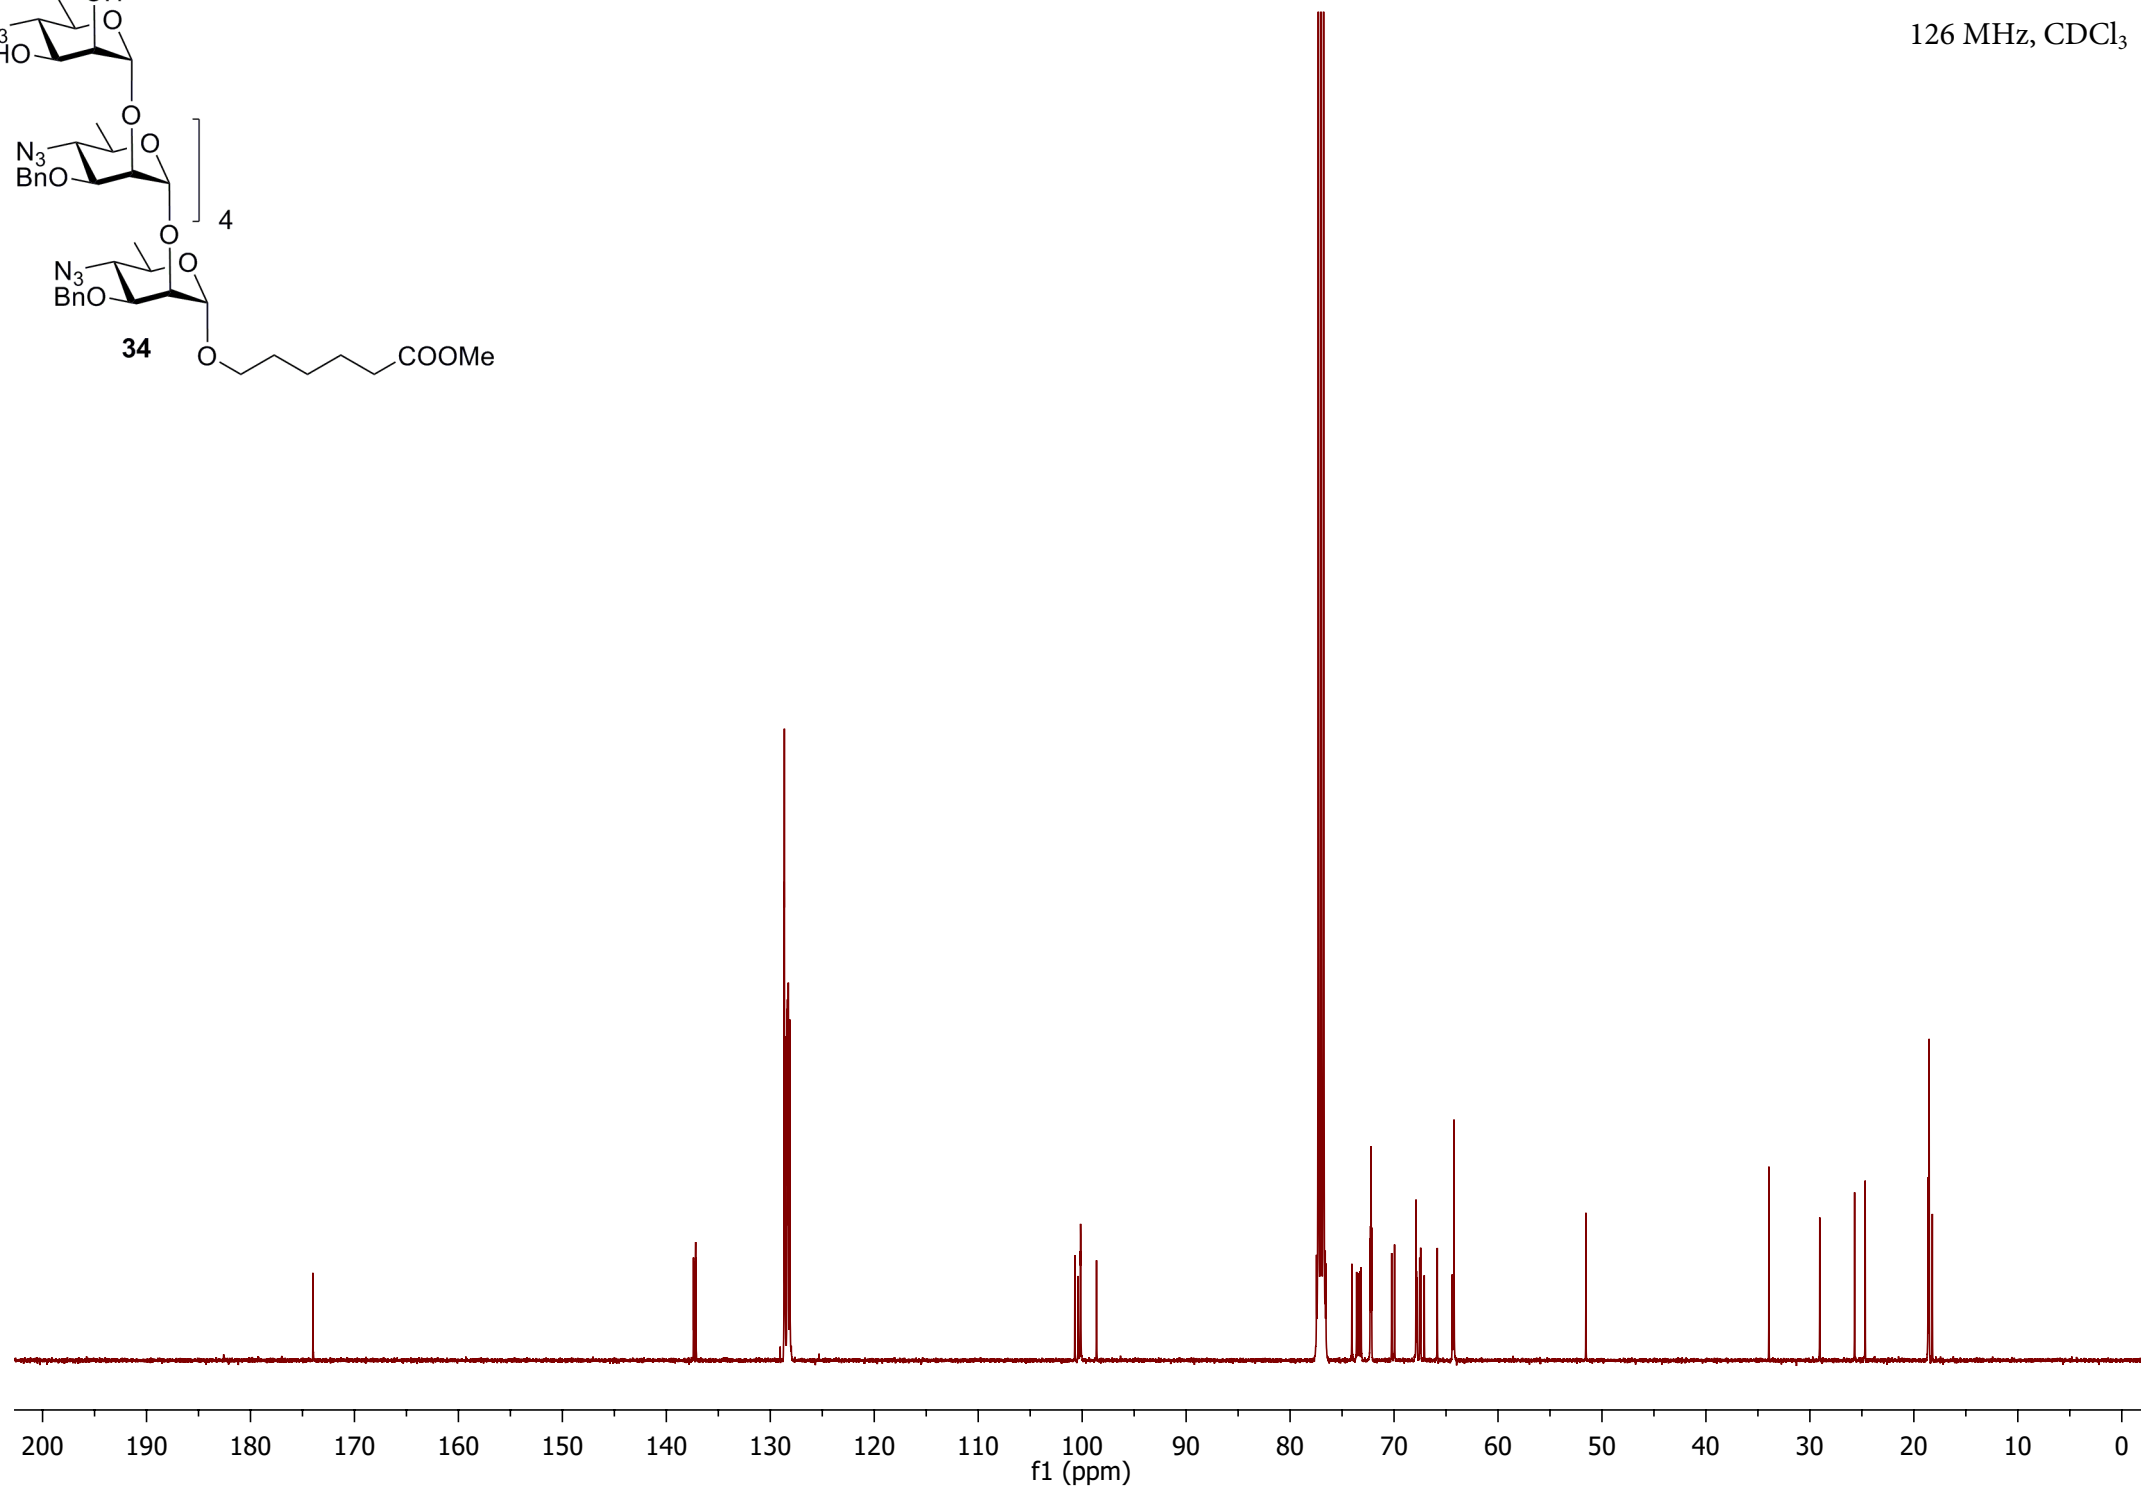

500 MHz, D<sub>2</sub>O

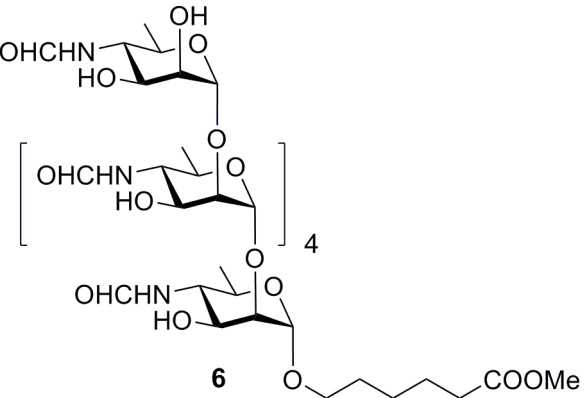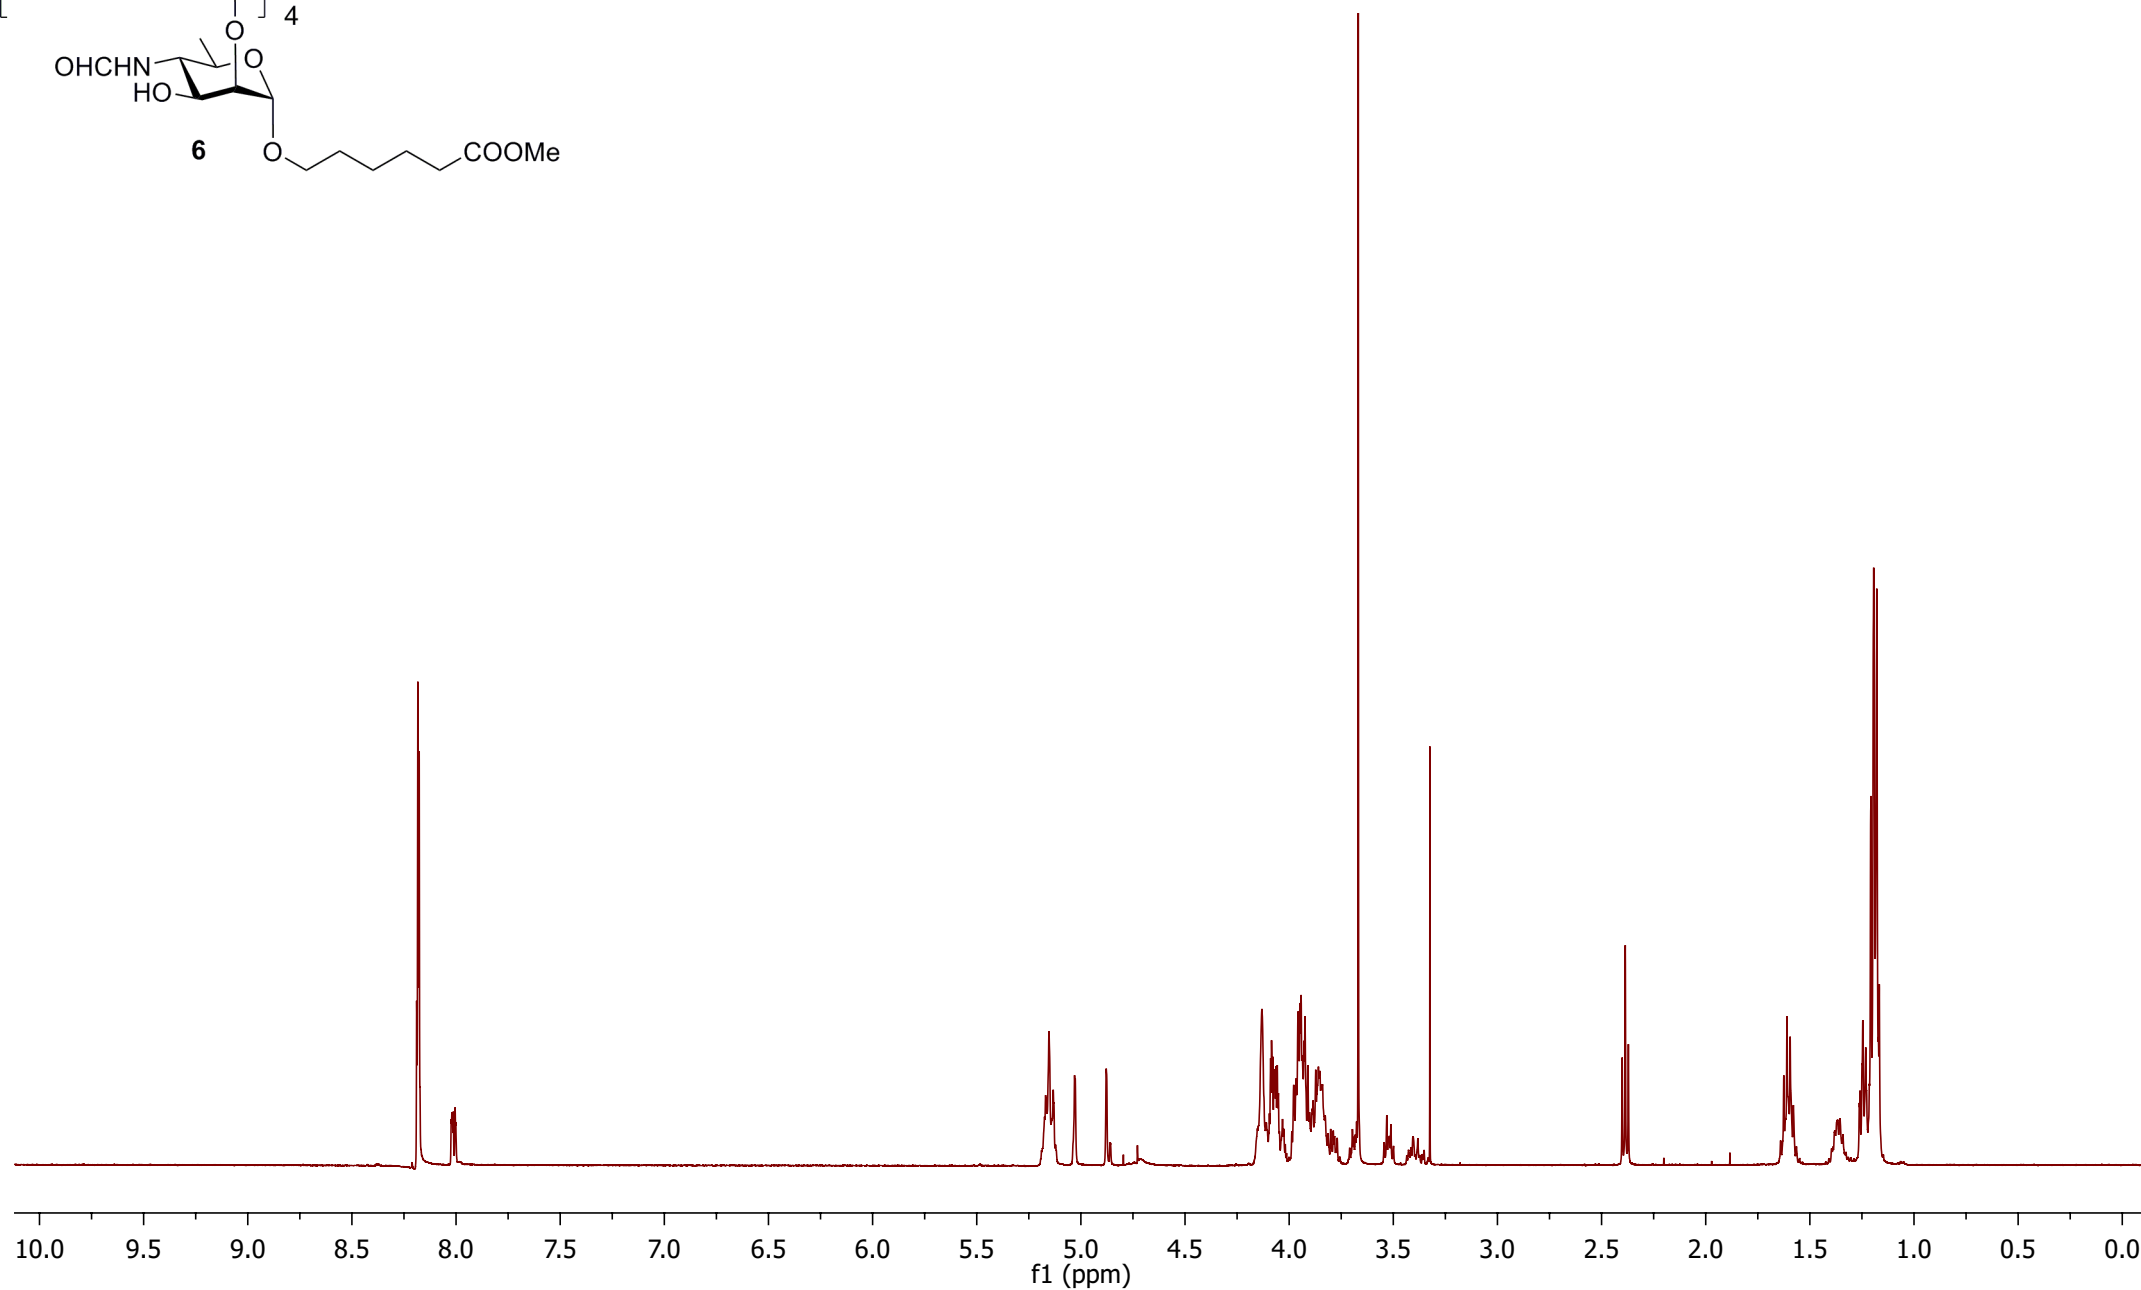

126 MHz, D<sub>2</sub>O

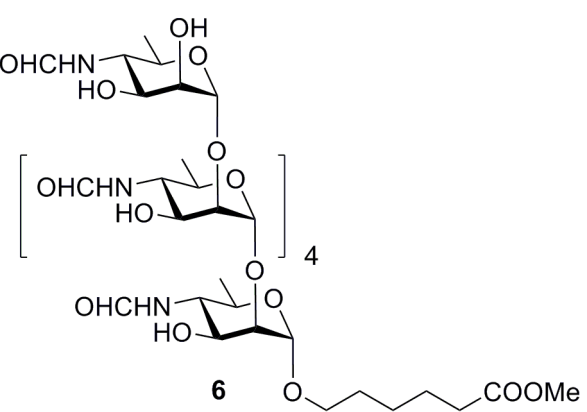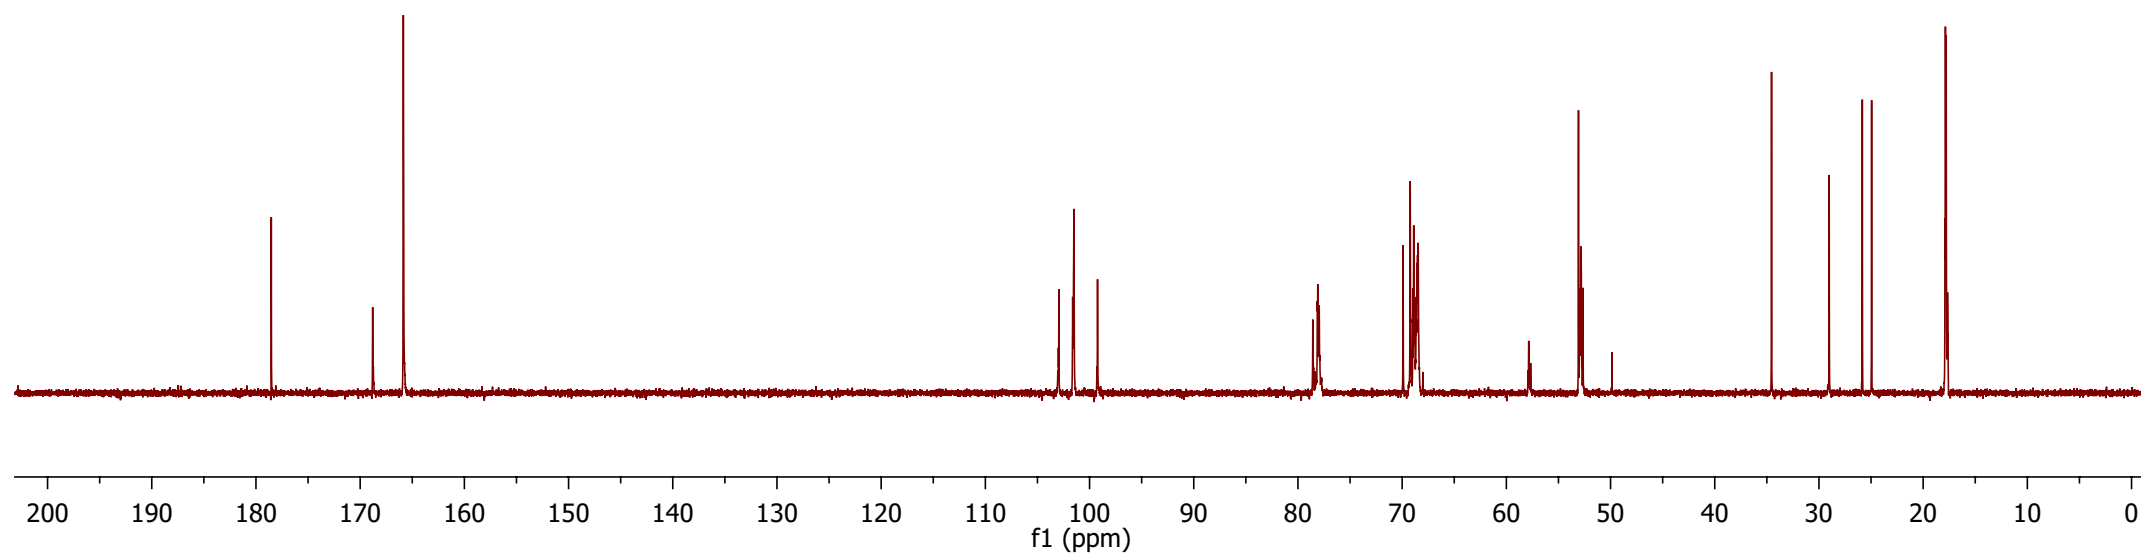

700 MHz, D<sub>2</sub>O

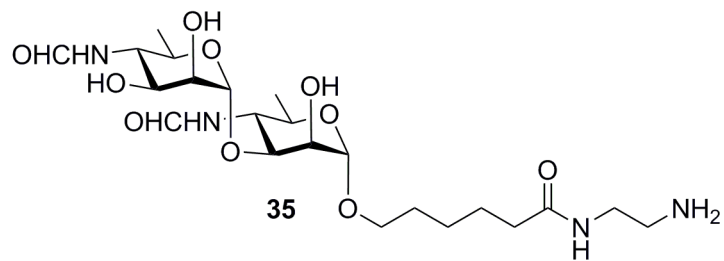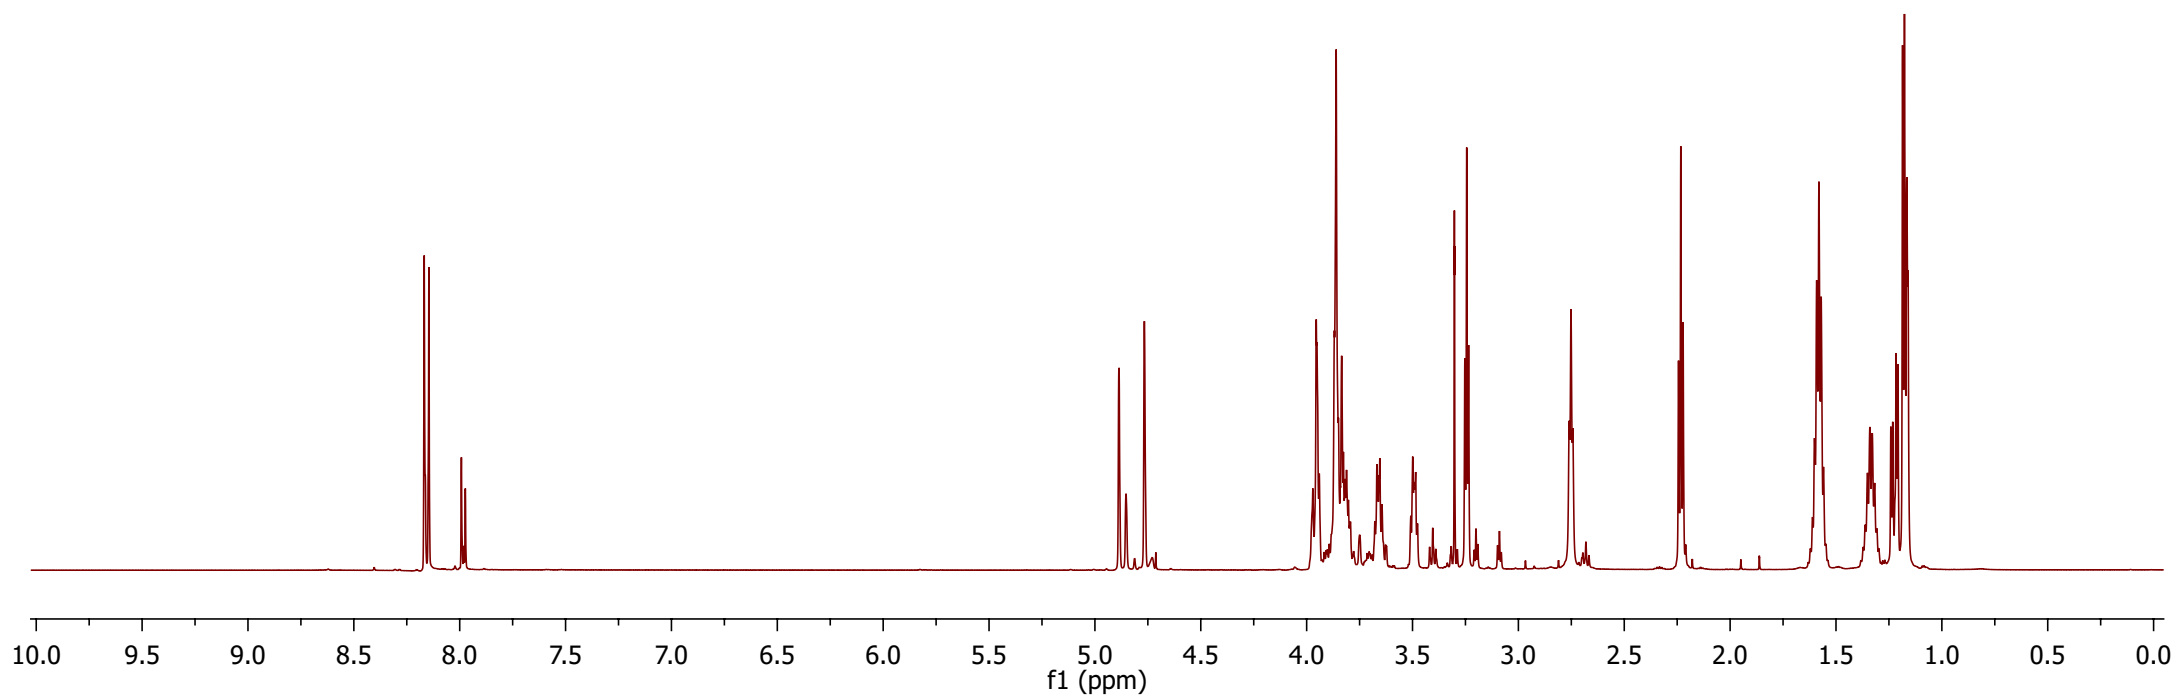

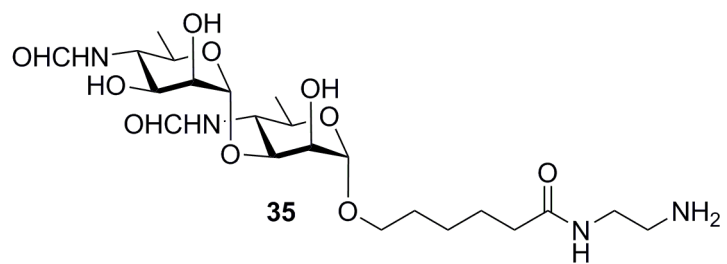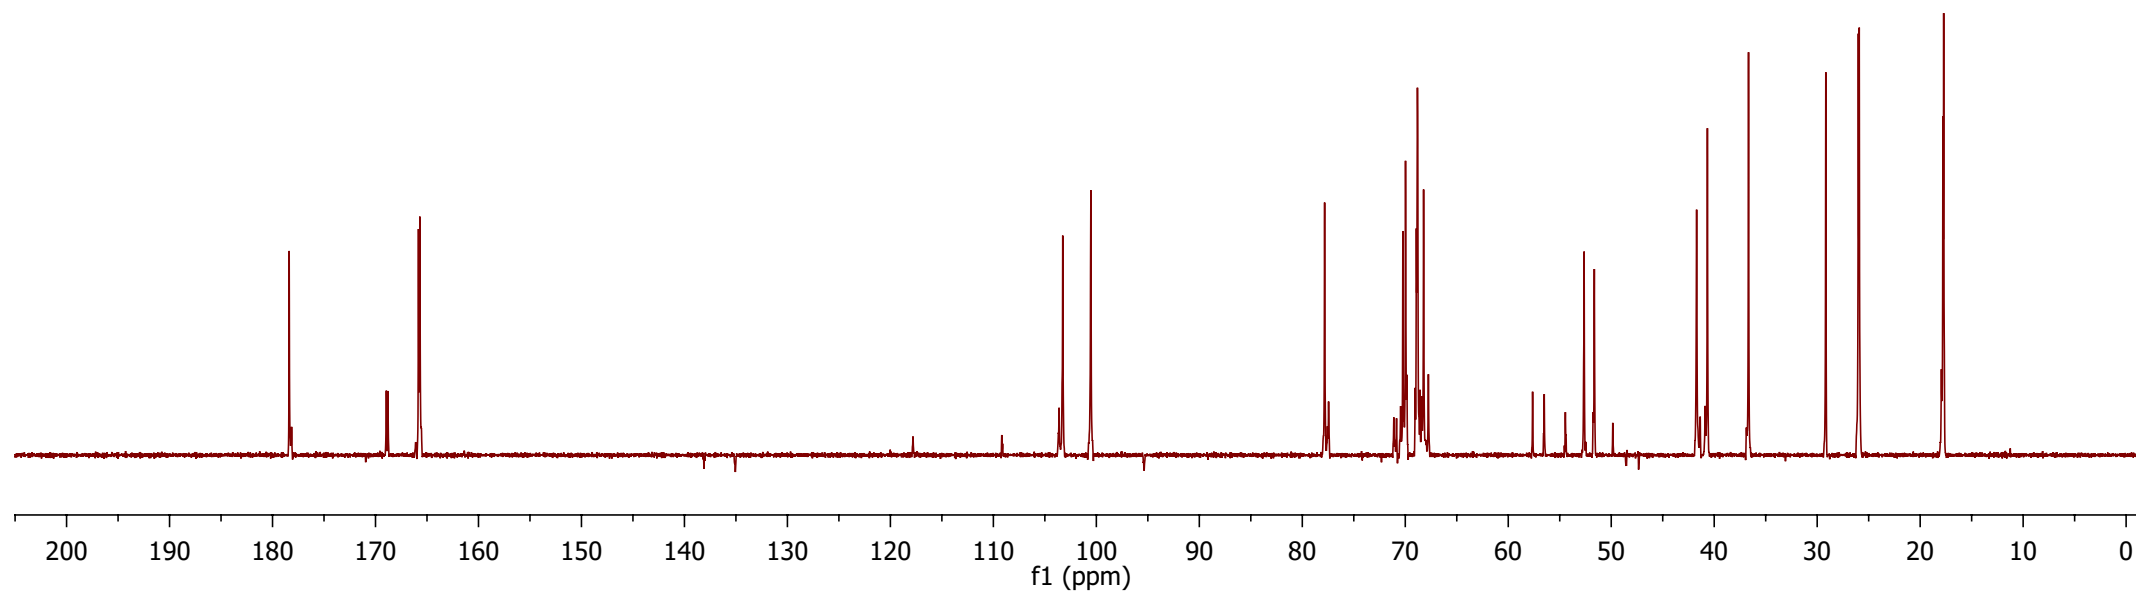



500 MHz, D<sub>2</sub>O

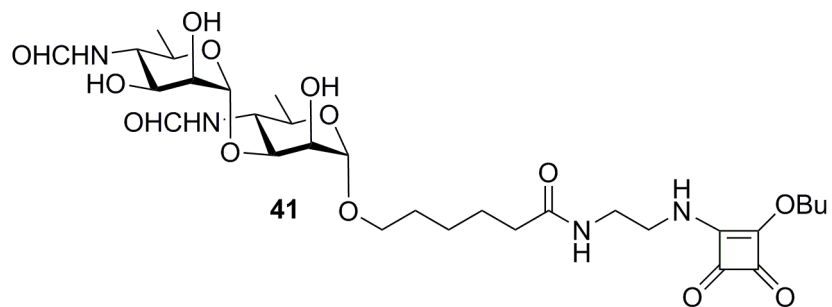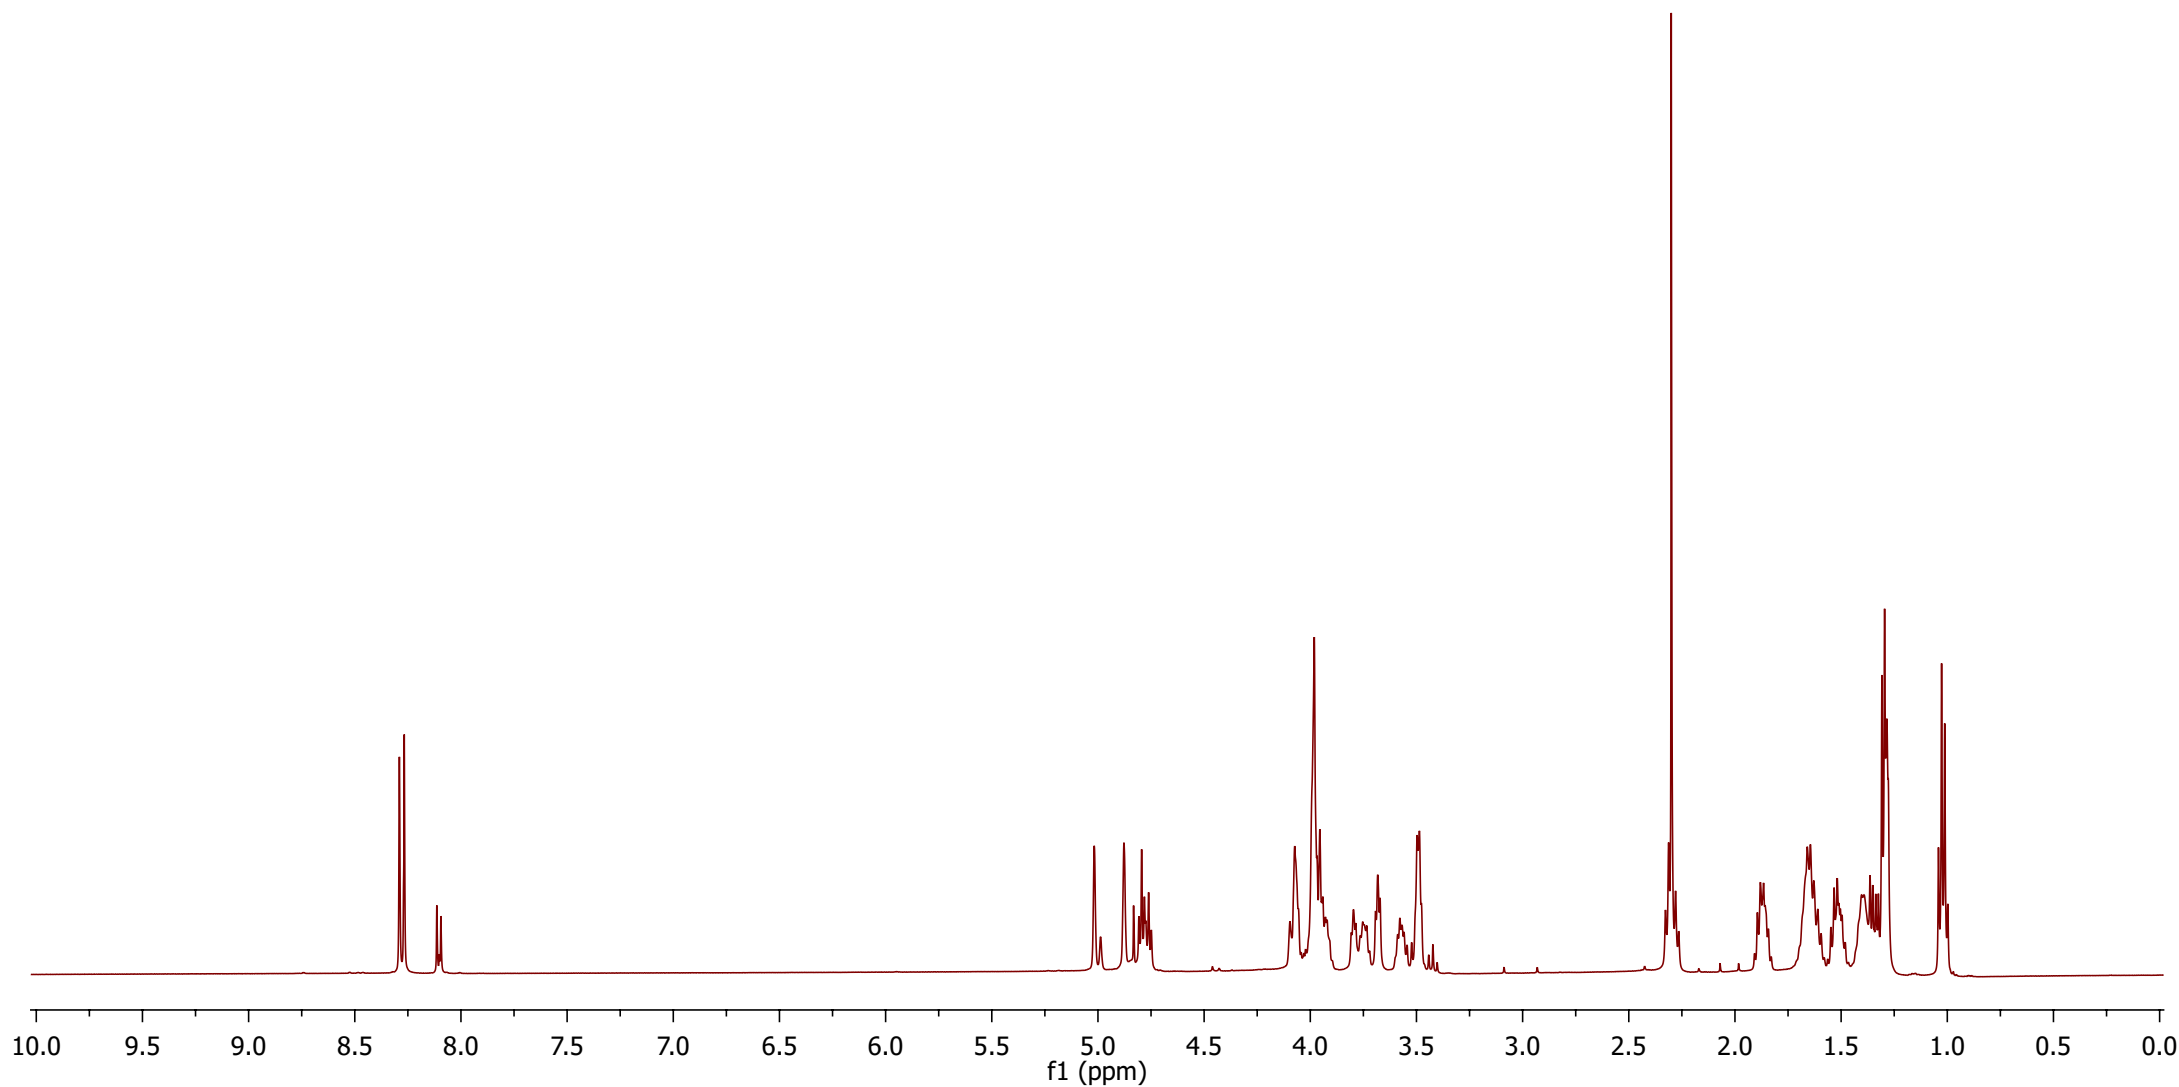

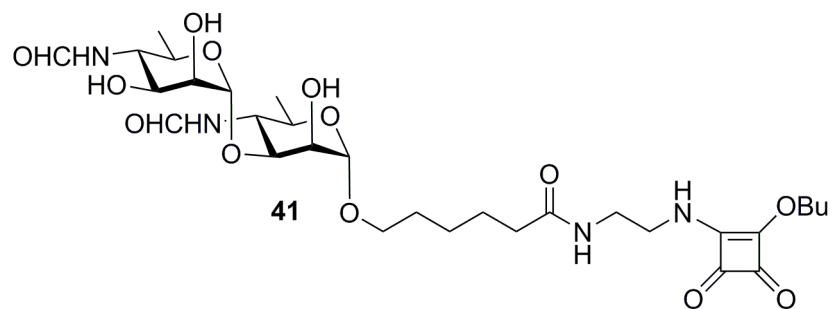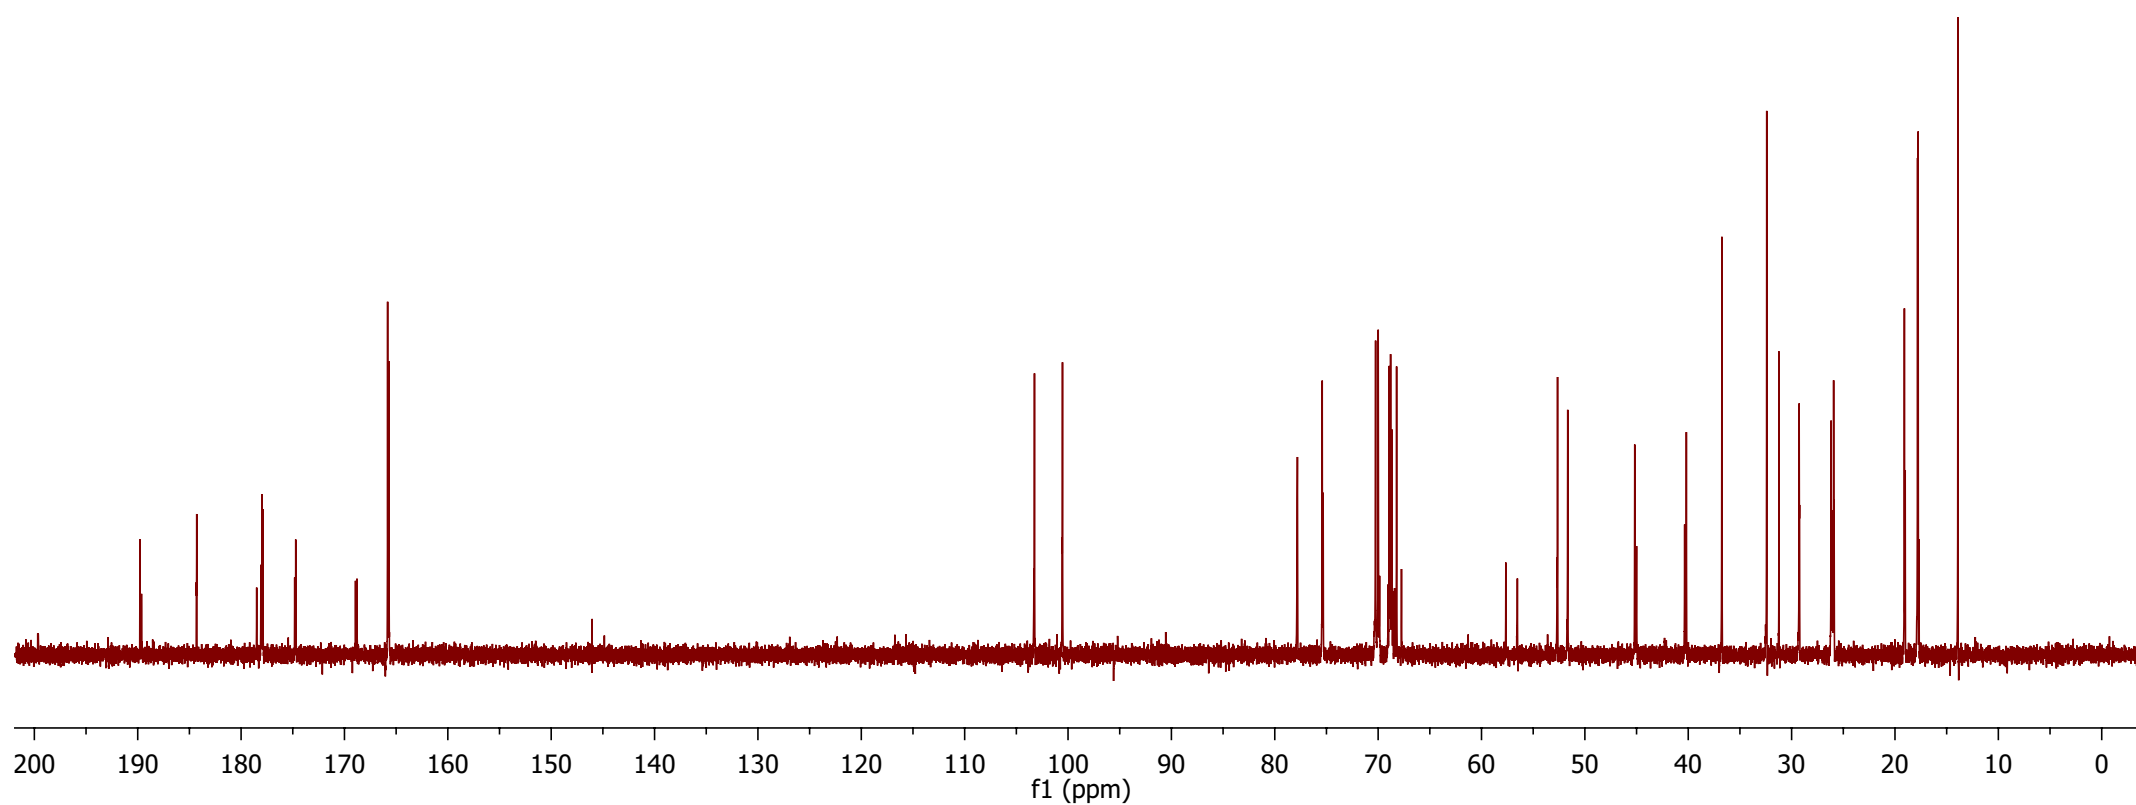

500 MHz, D<sub>2</sub>O

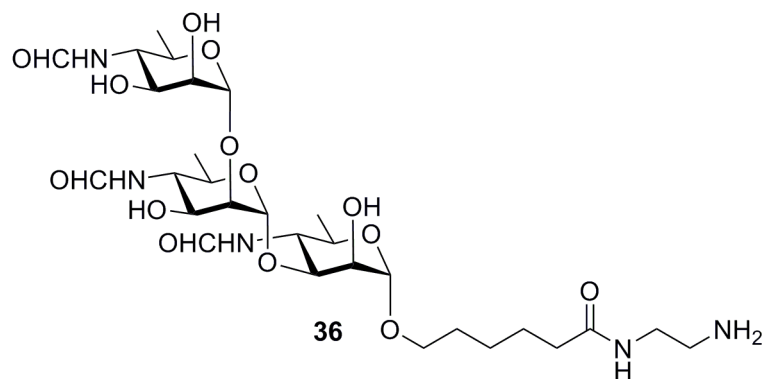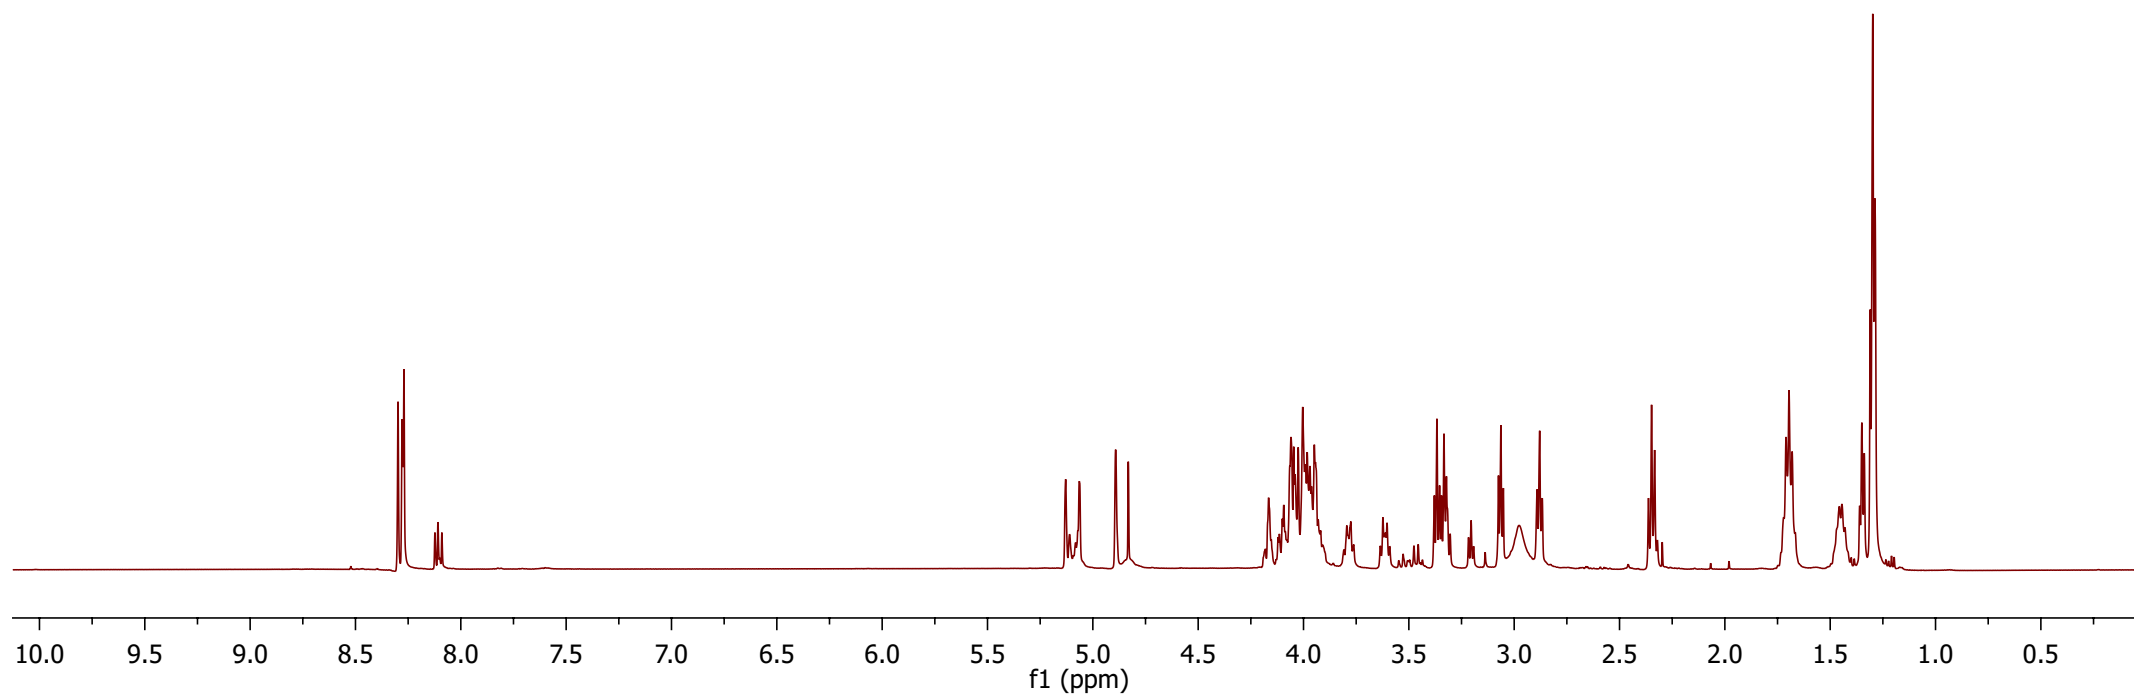

126 MHz, D<sub>2</sub>O

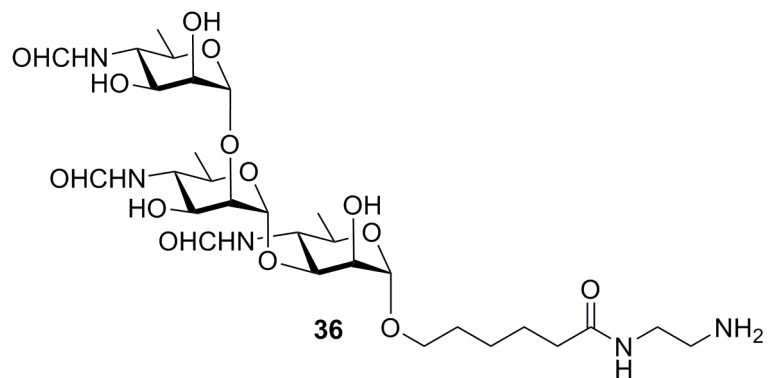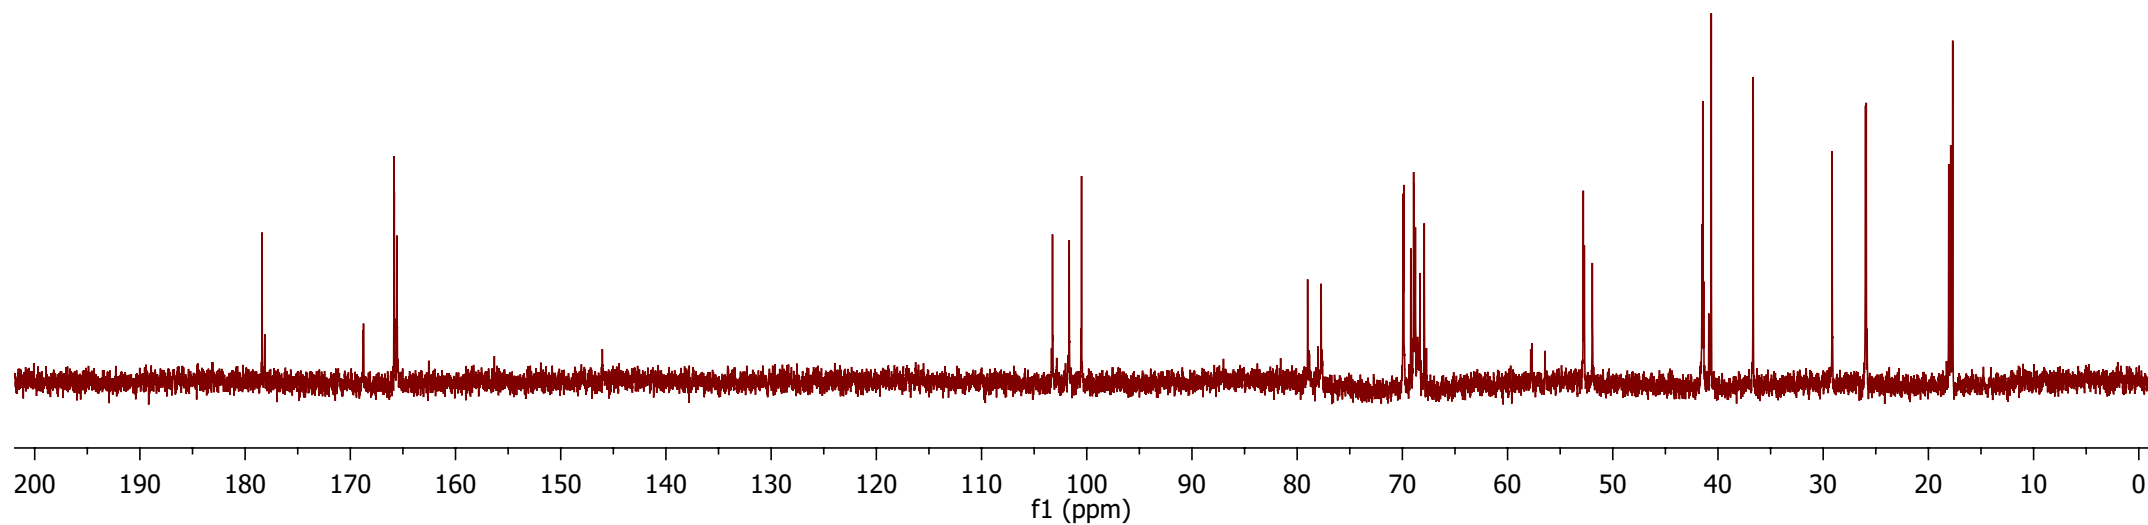

500 MHz, D<sub>2</sub>O

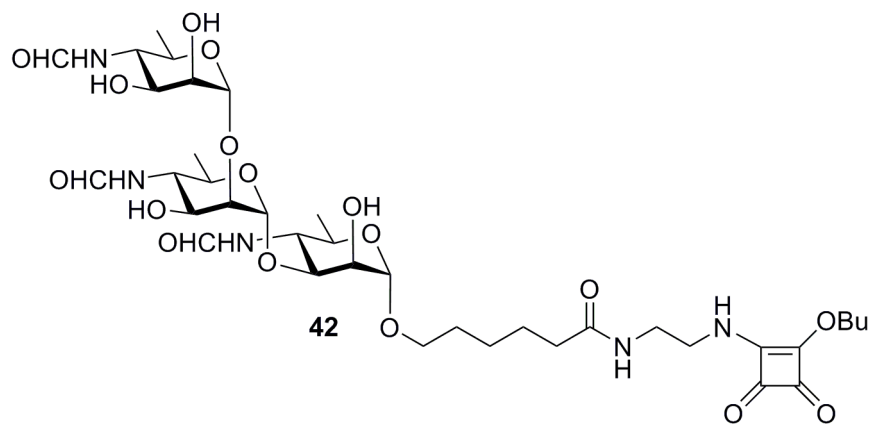

42

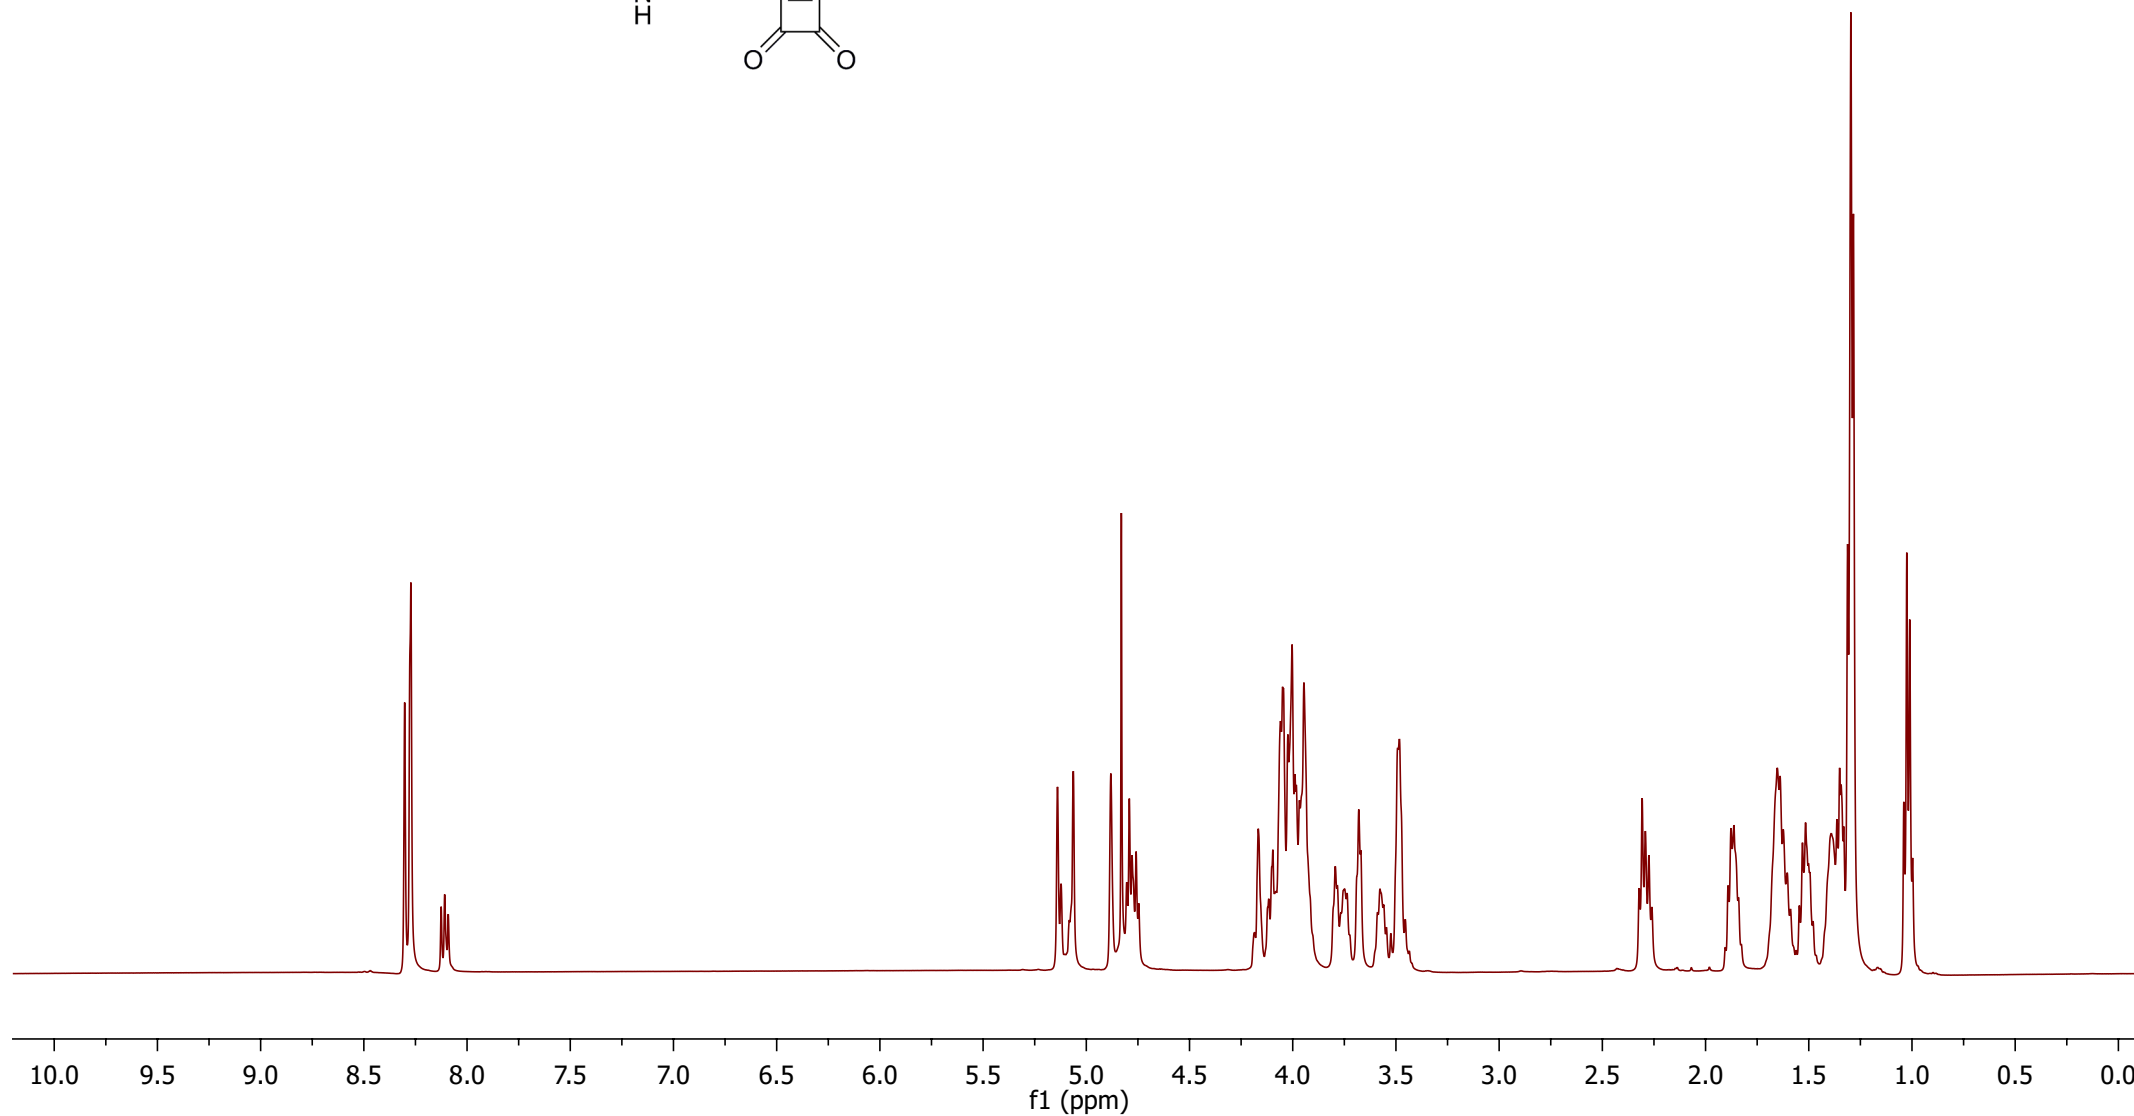

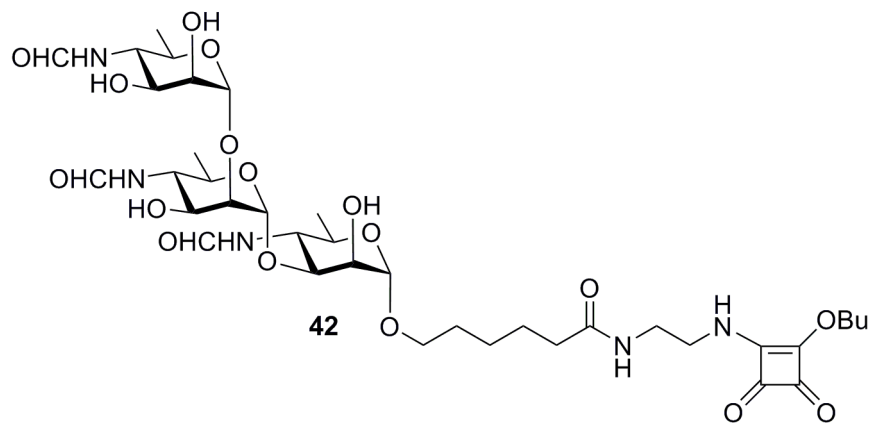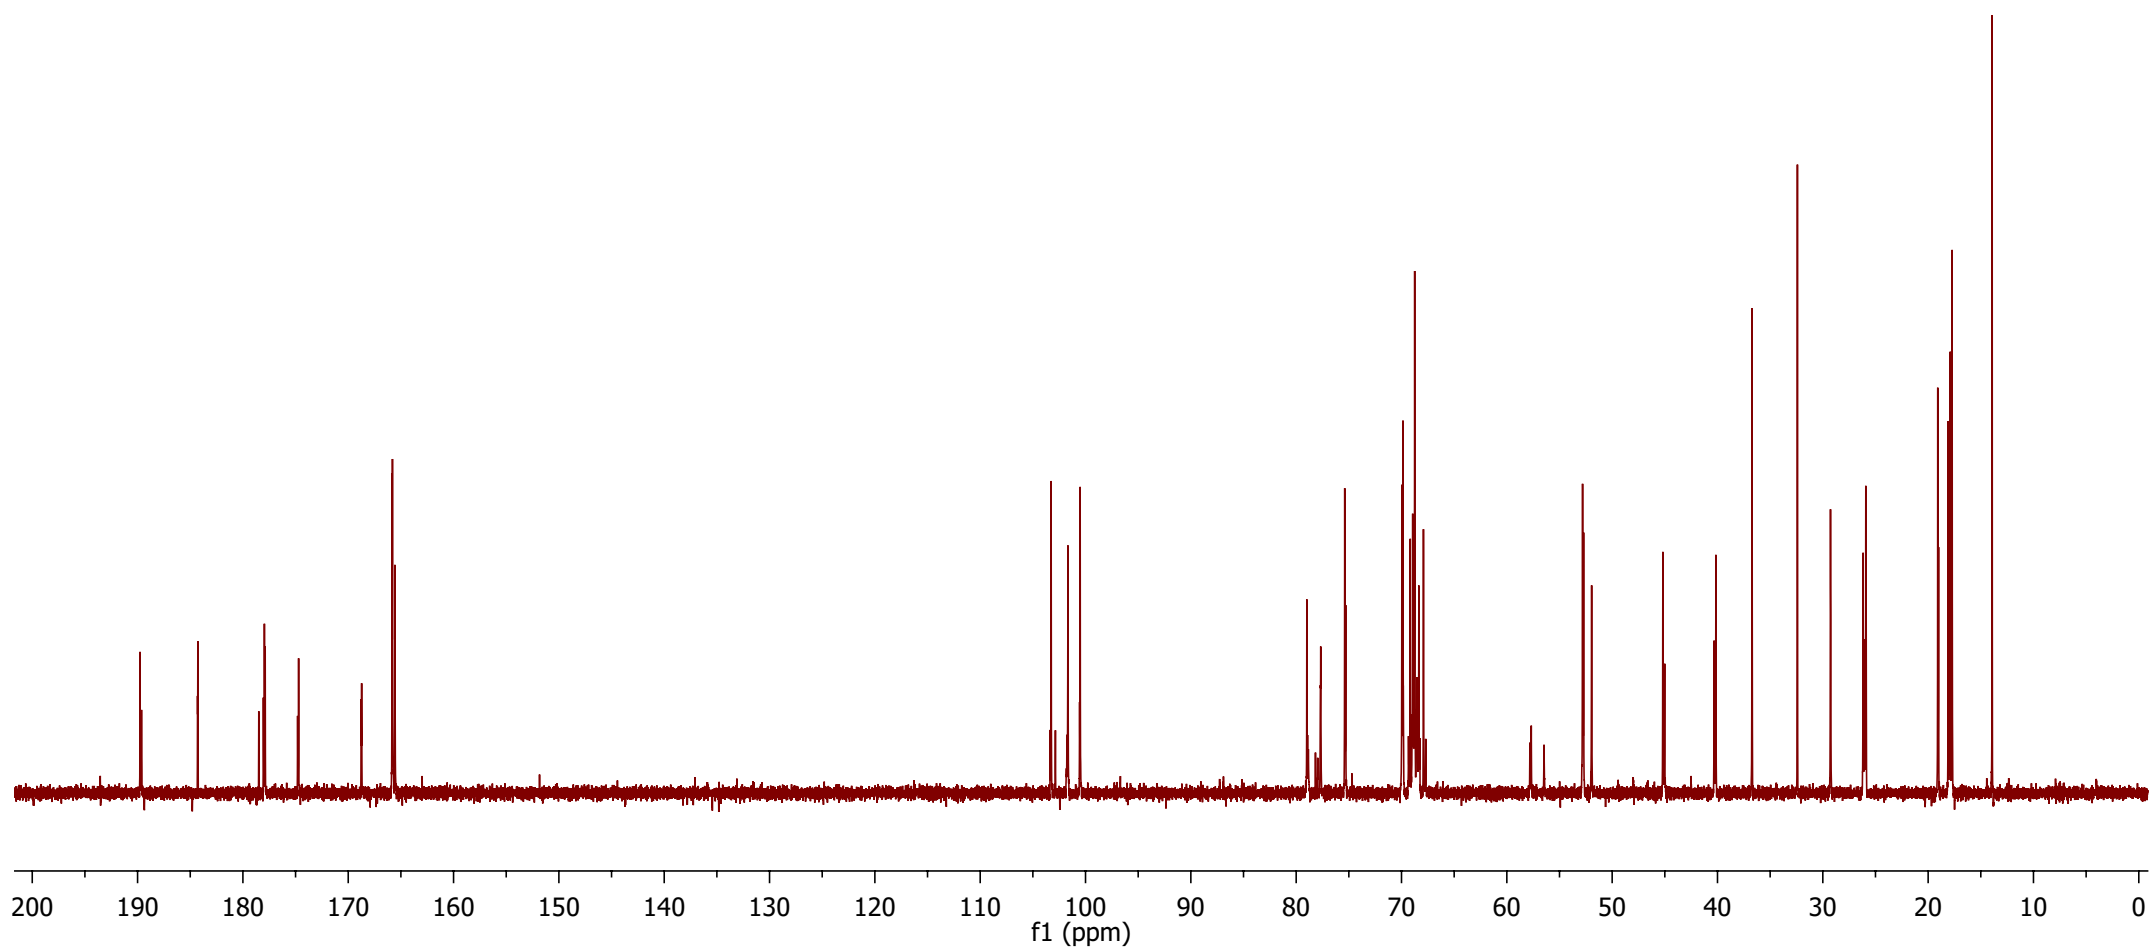

500 MHz, D<sub>2</sub>O

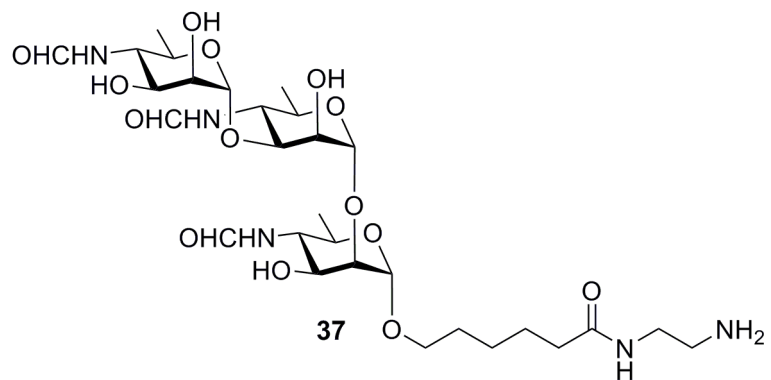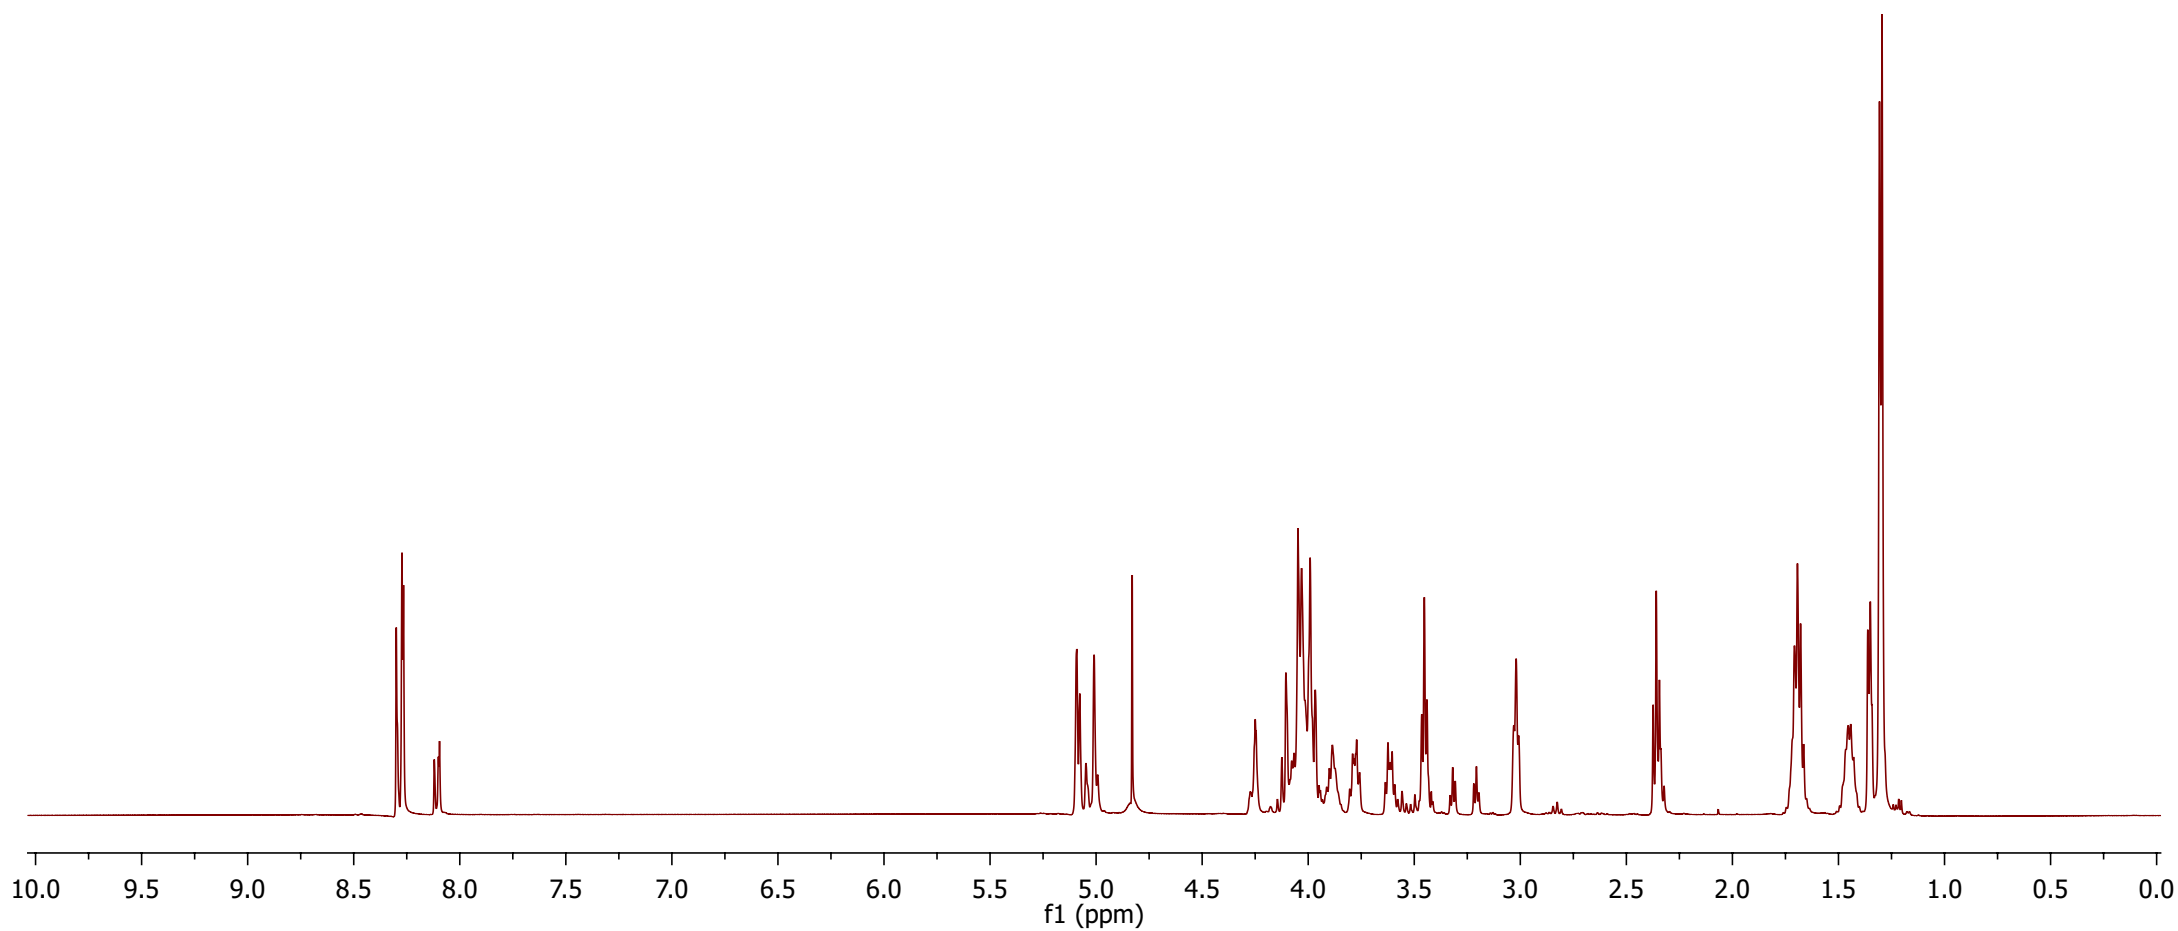

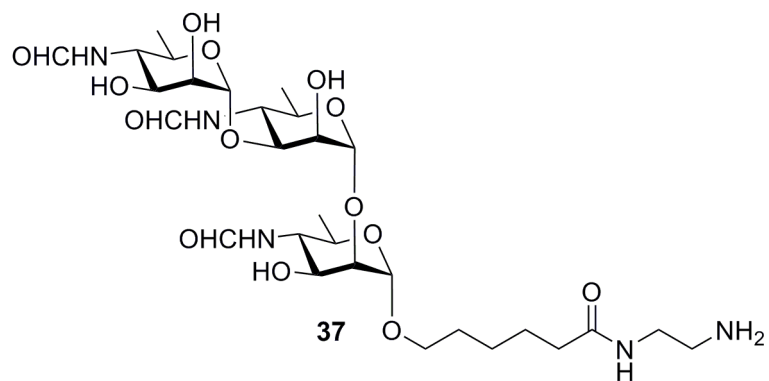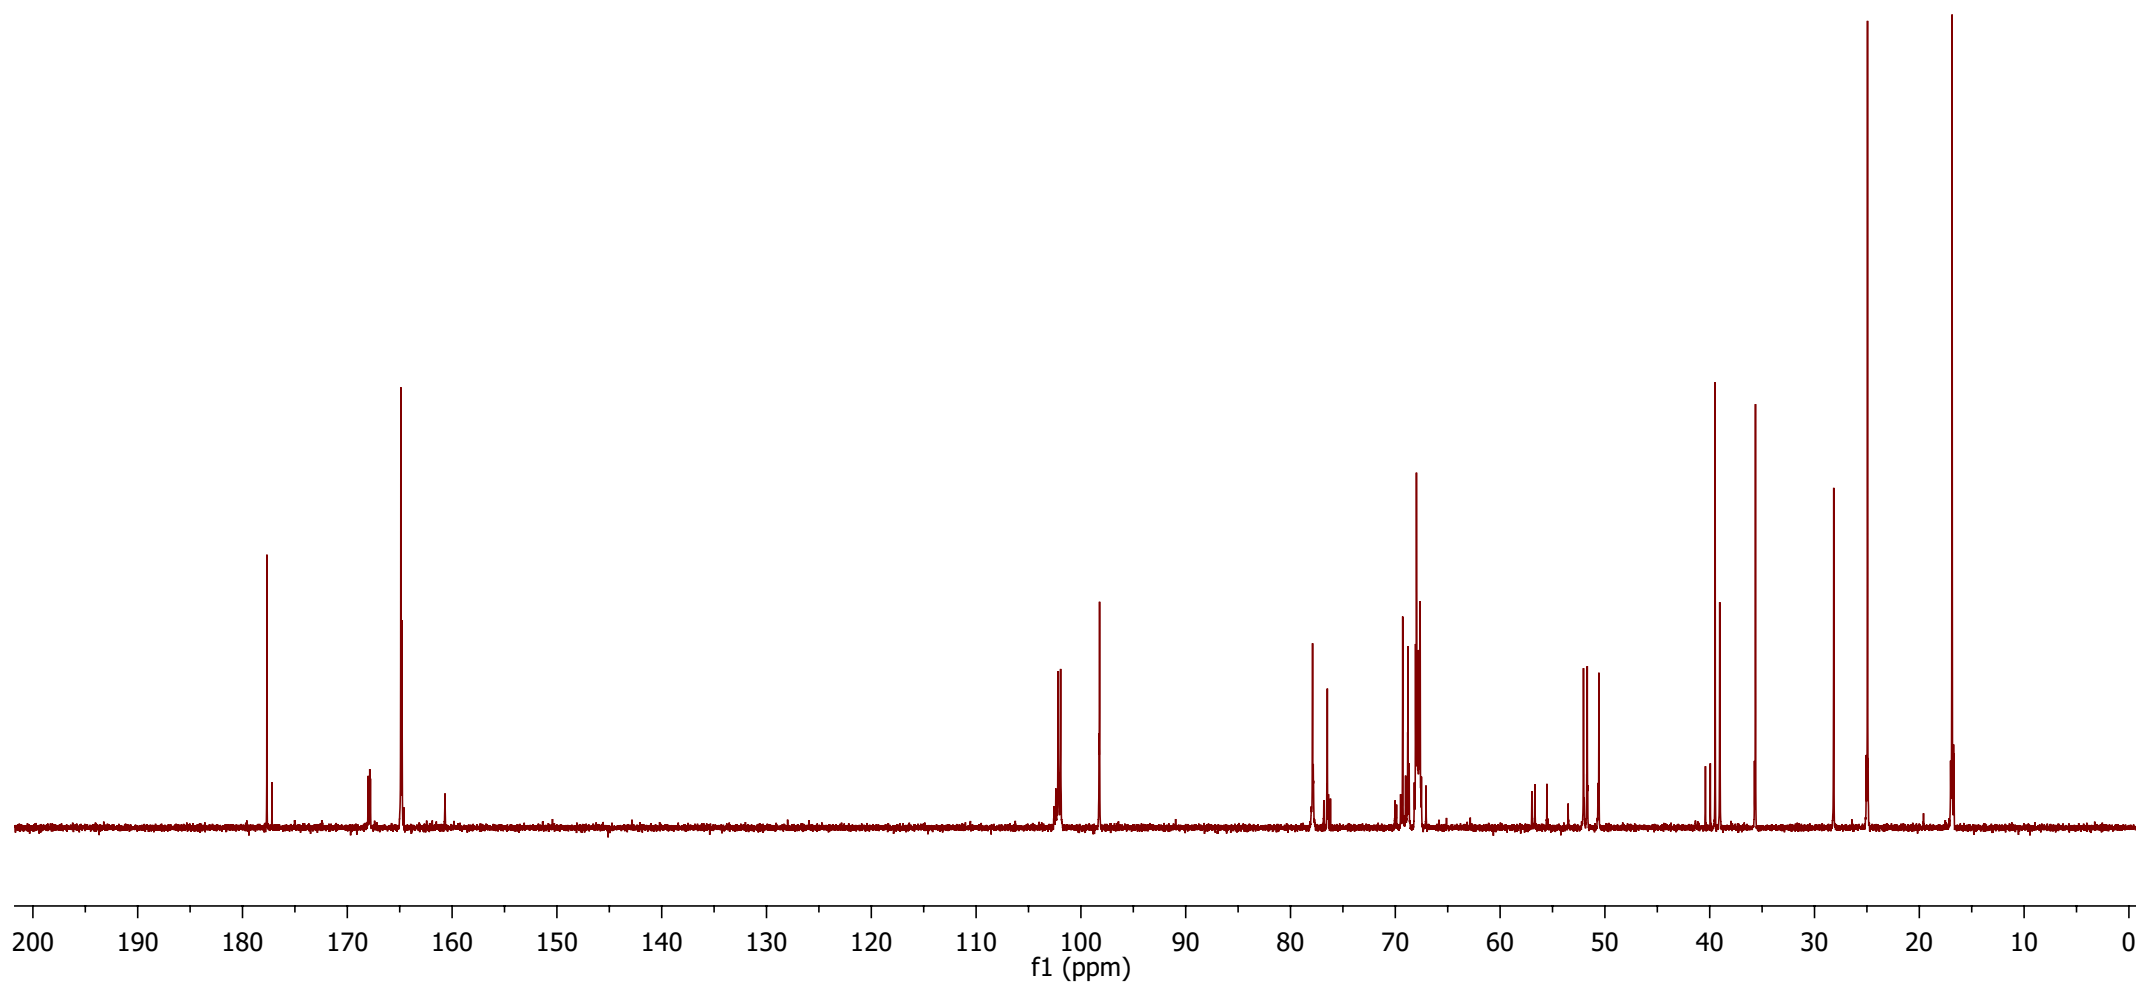



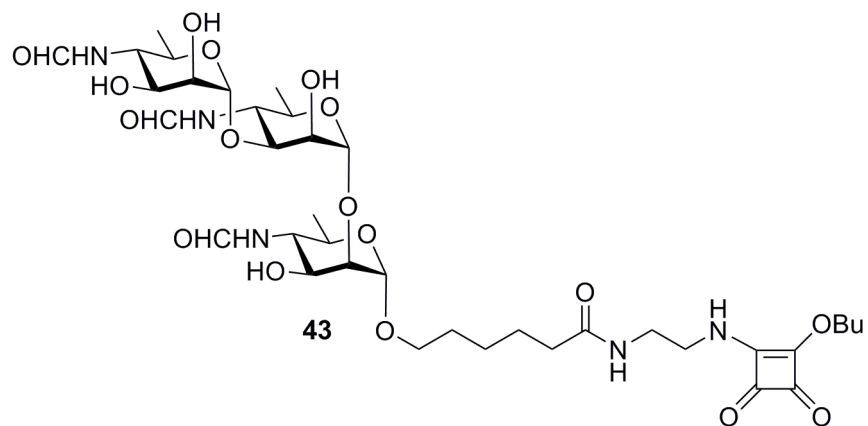

43

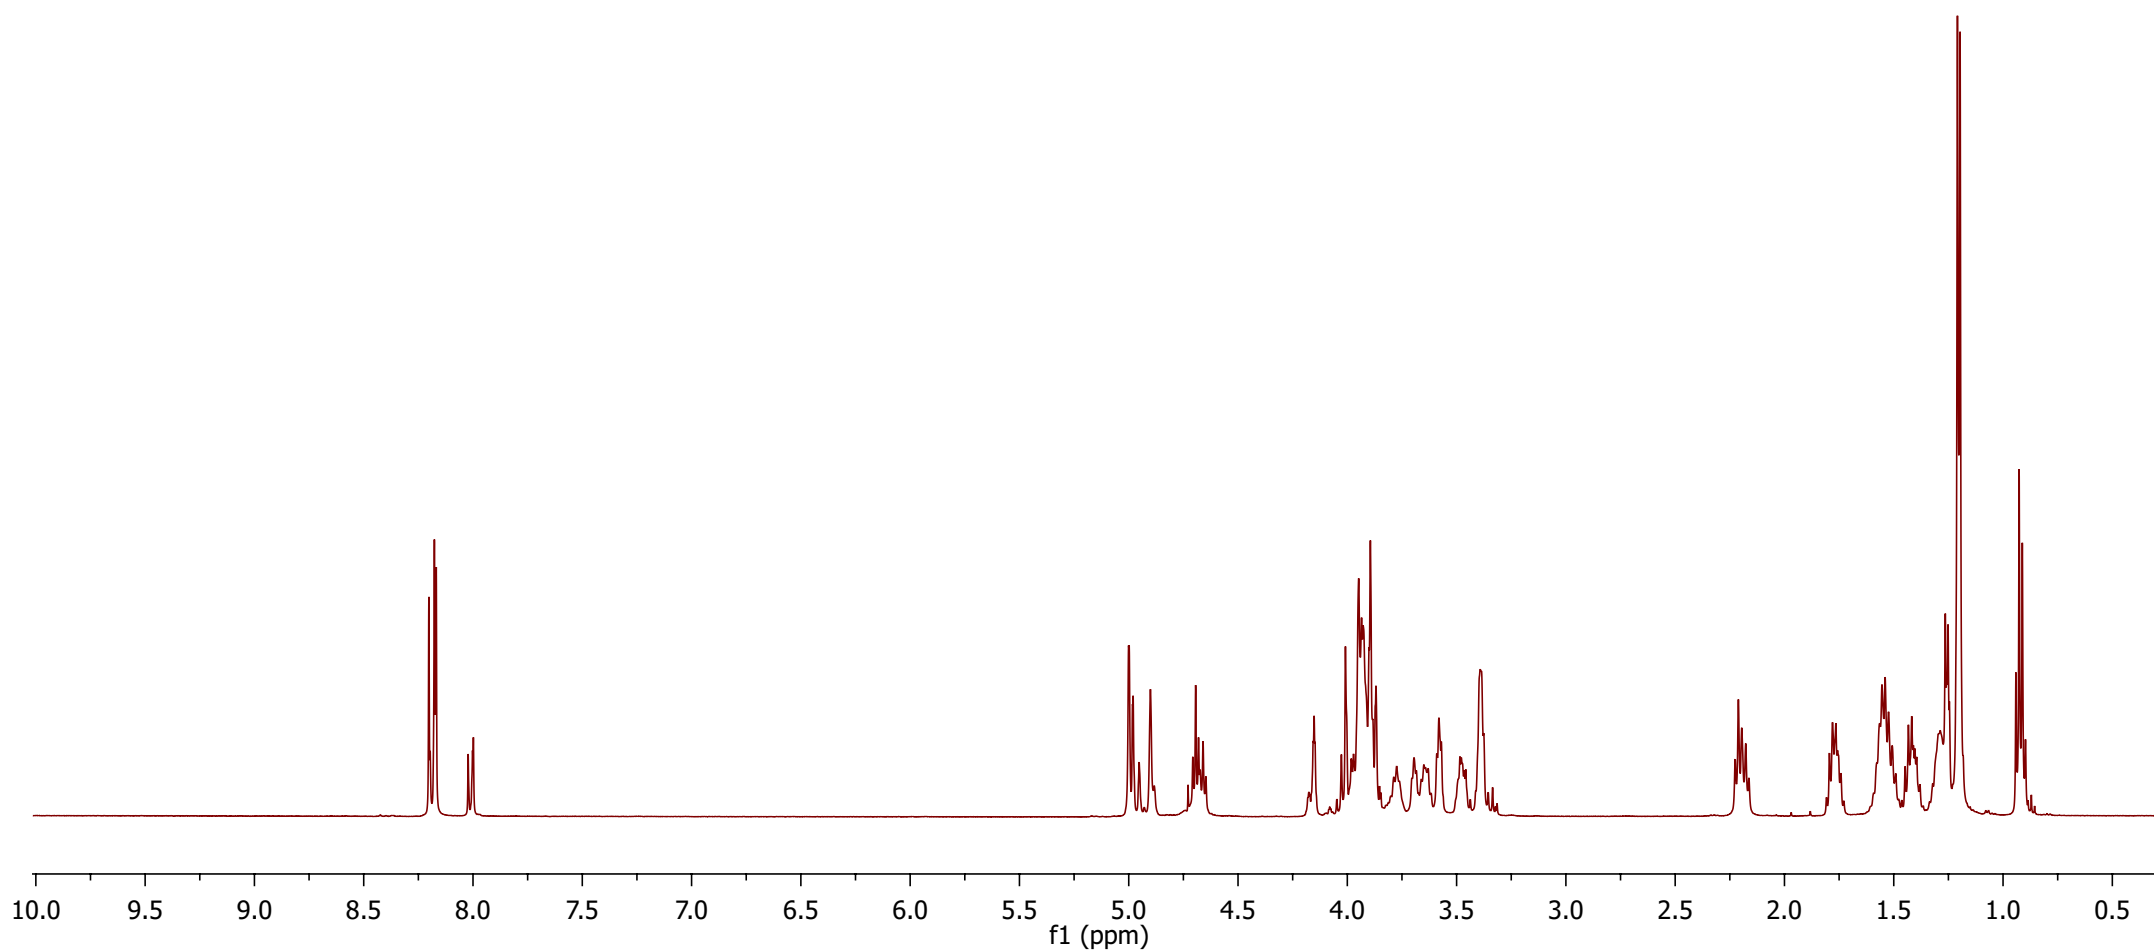

126 MHz, D<sub>2</sub>O

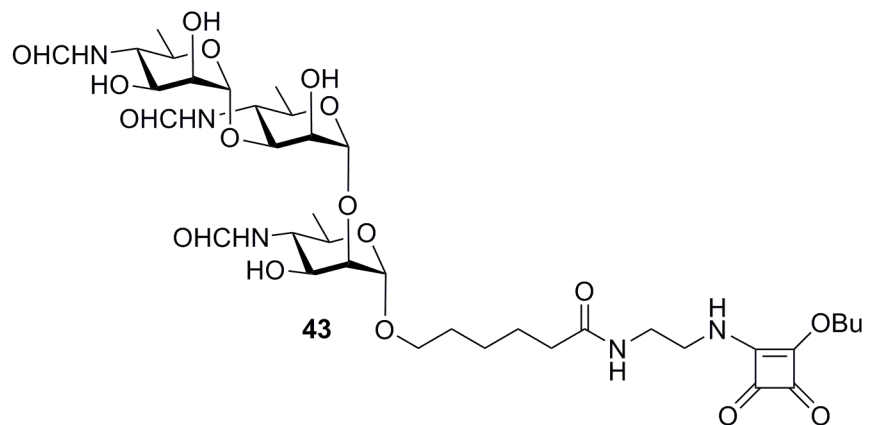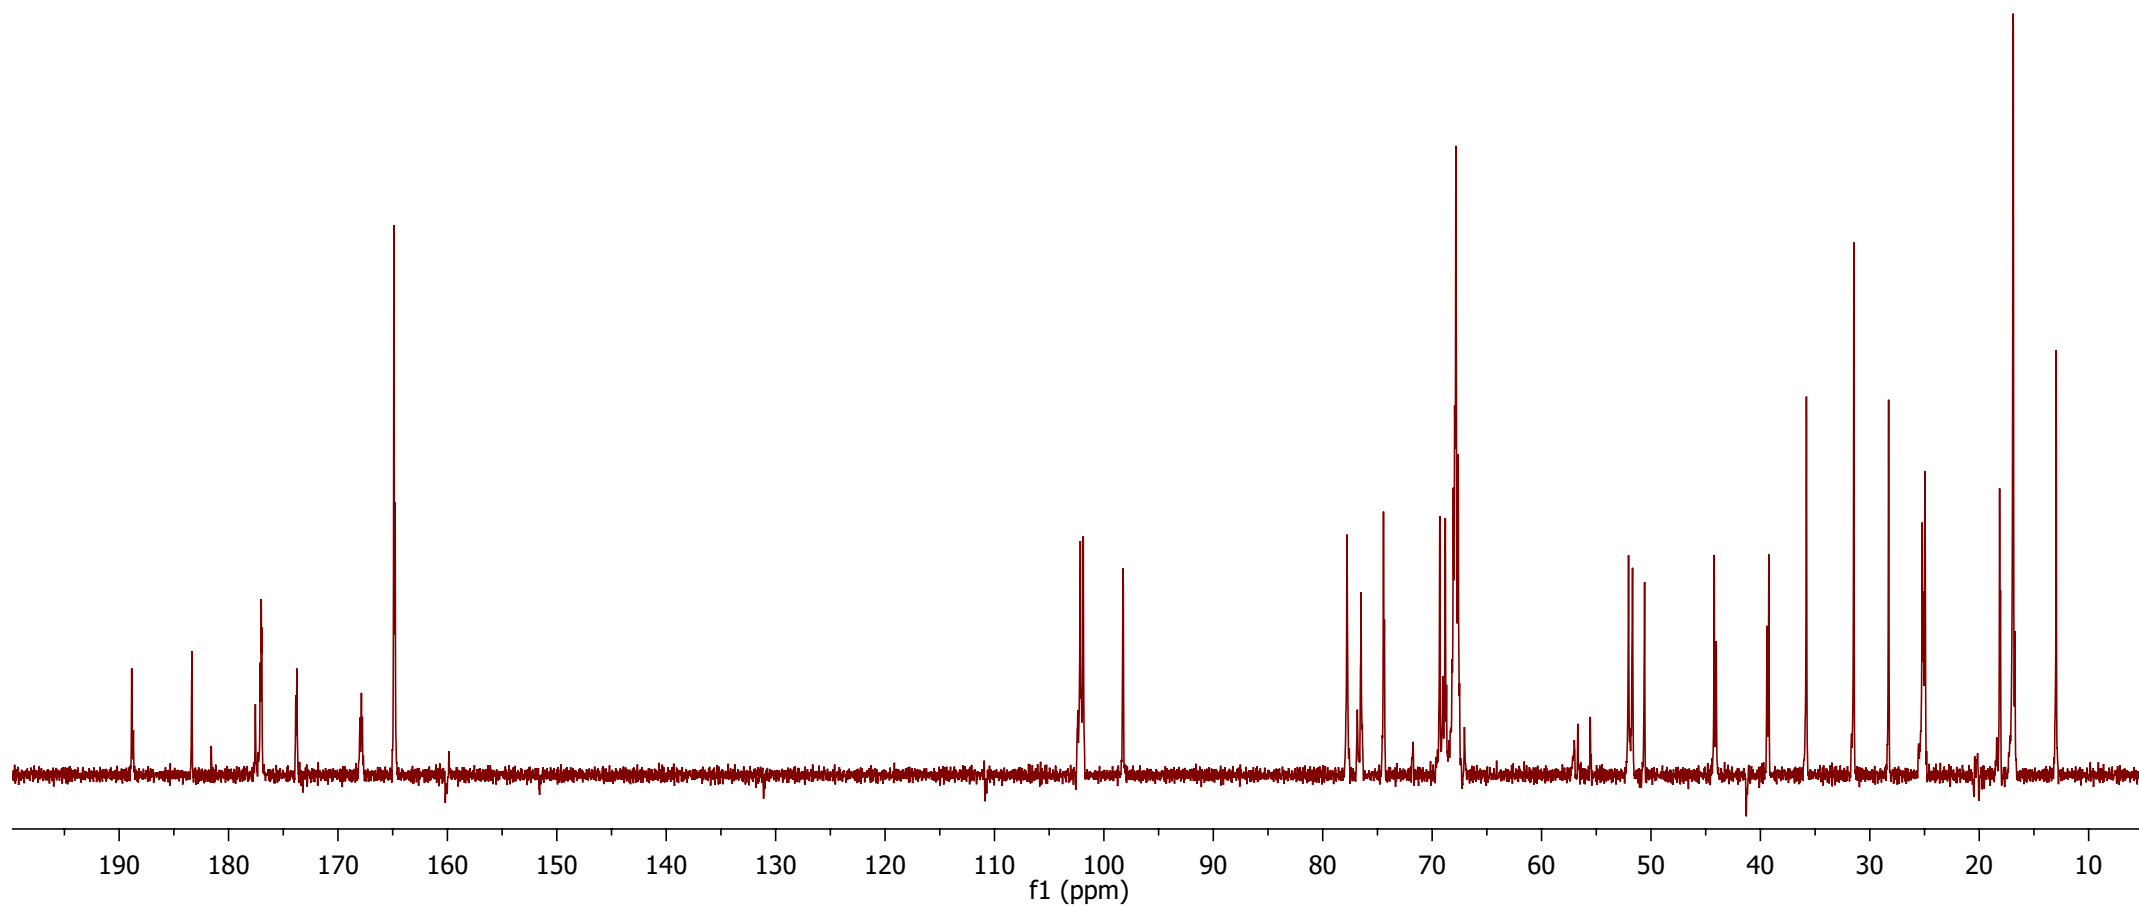

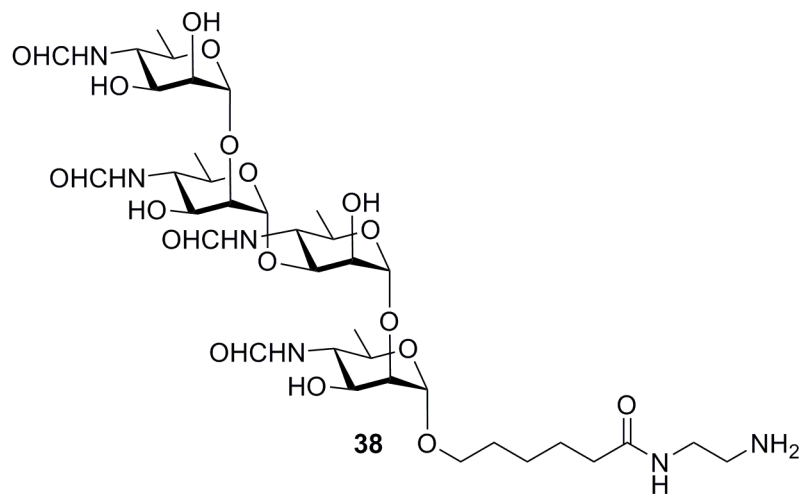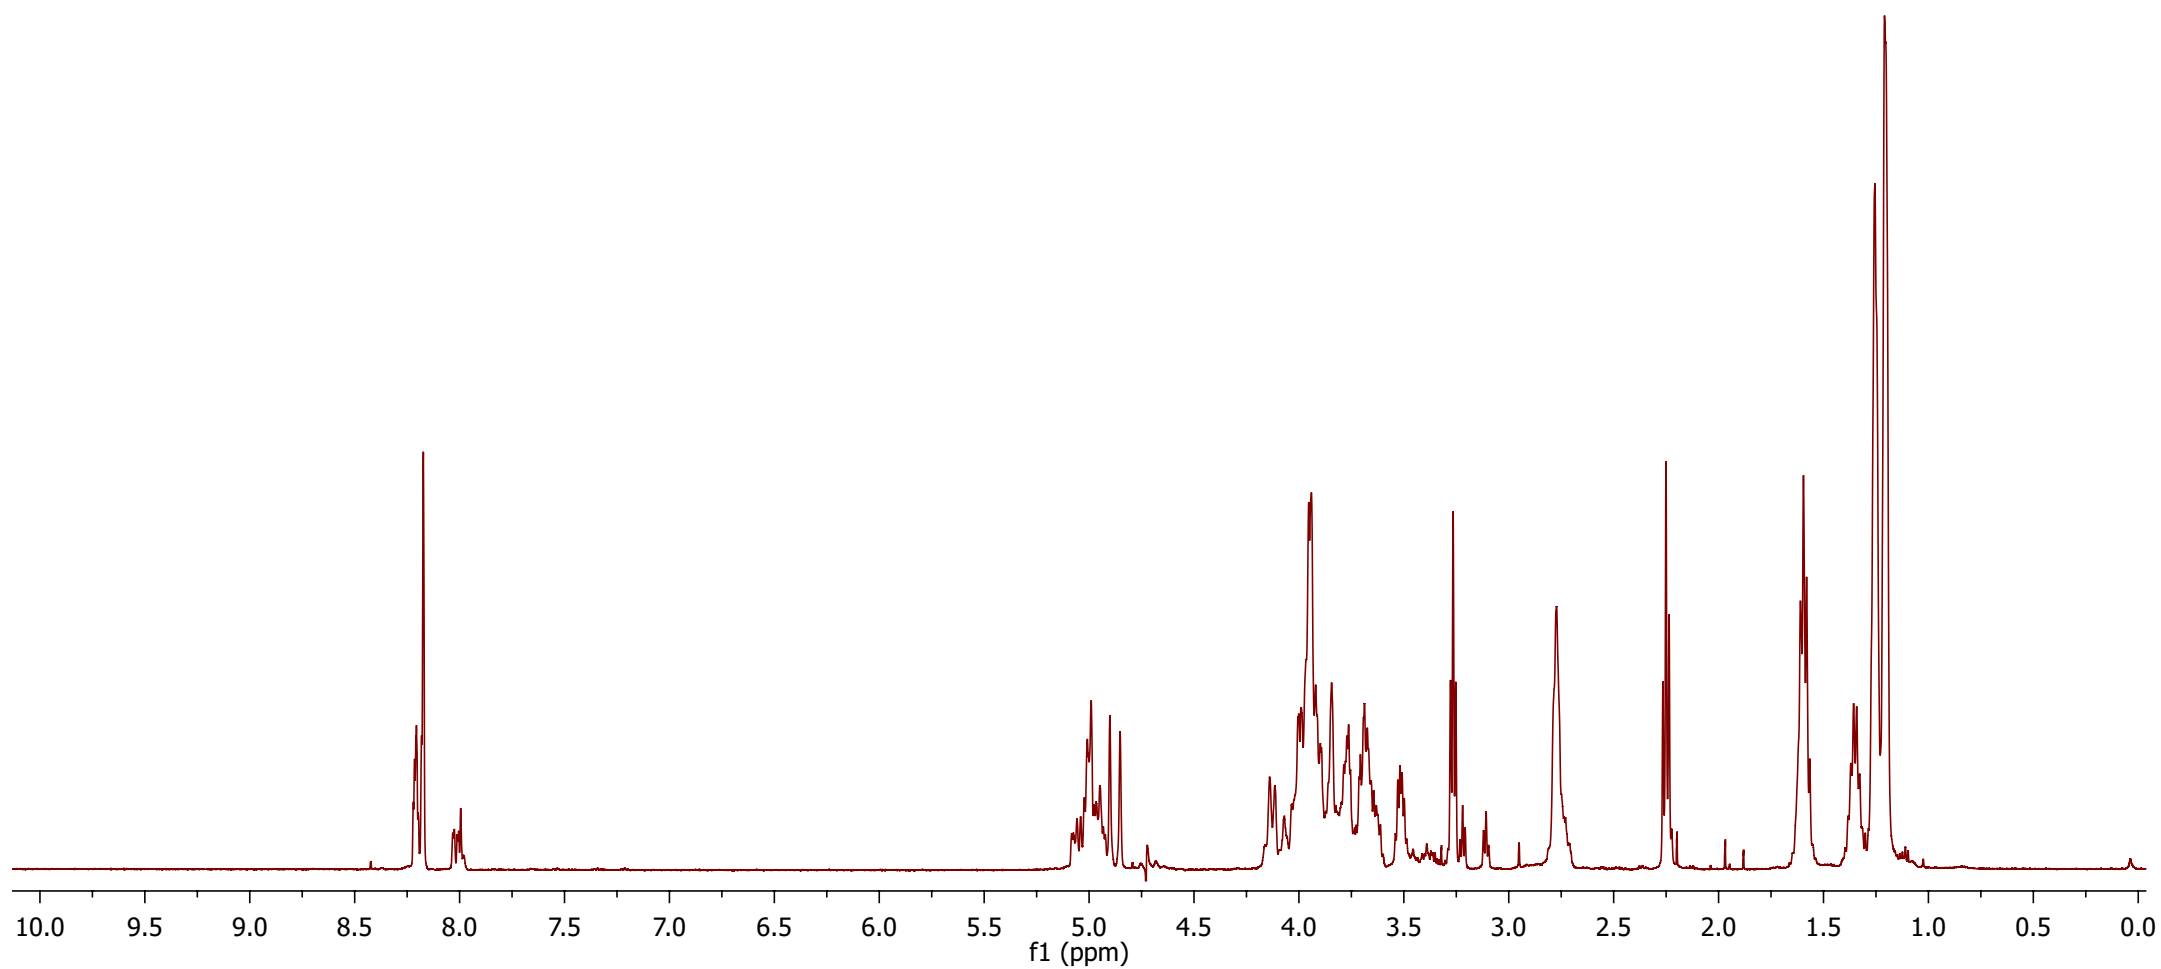

126 MHz, D<sub>2</sub>O

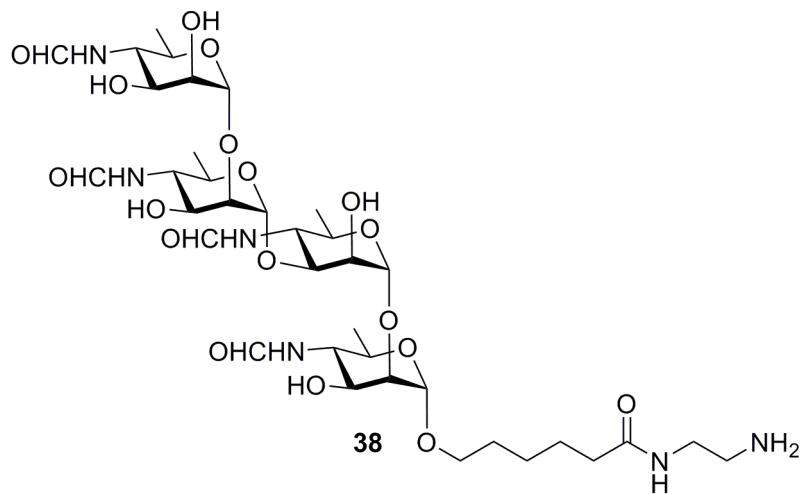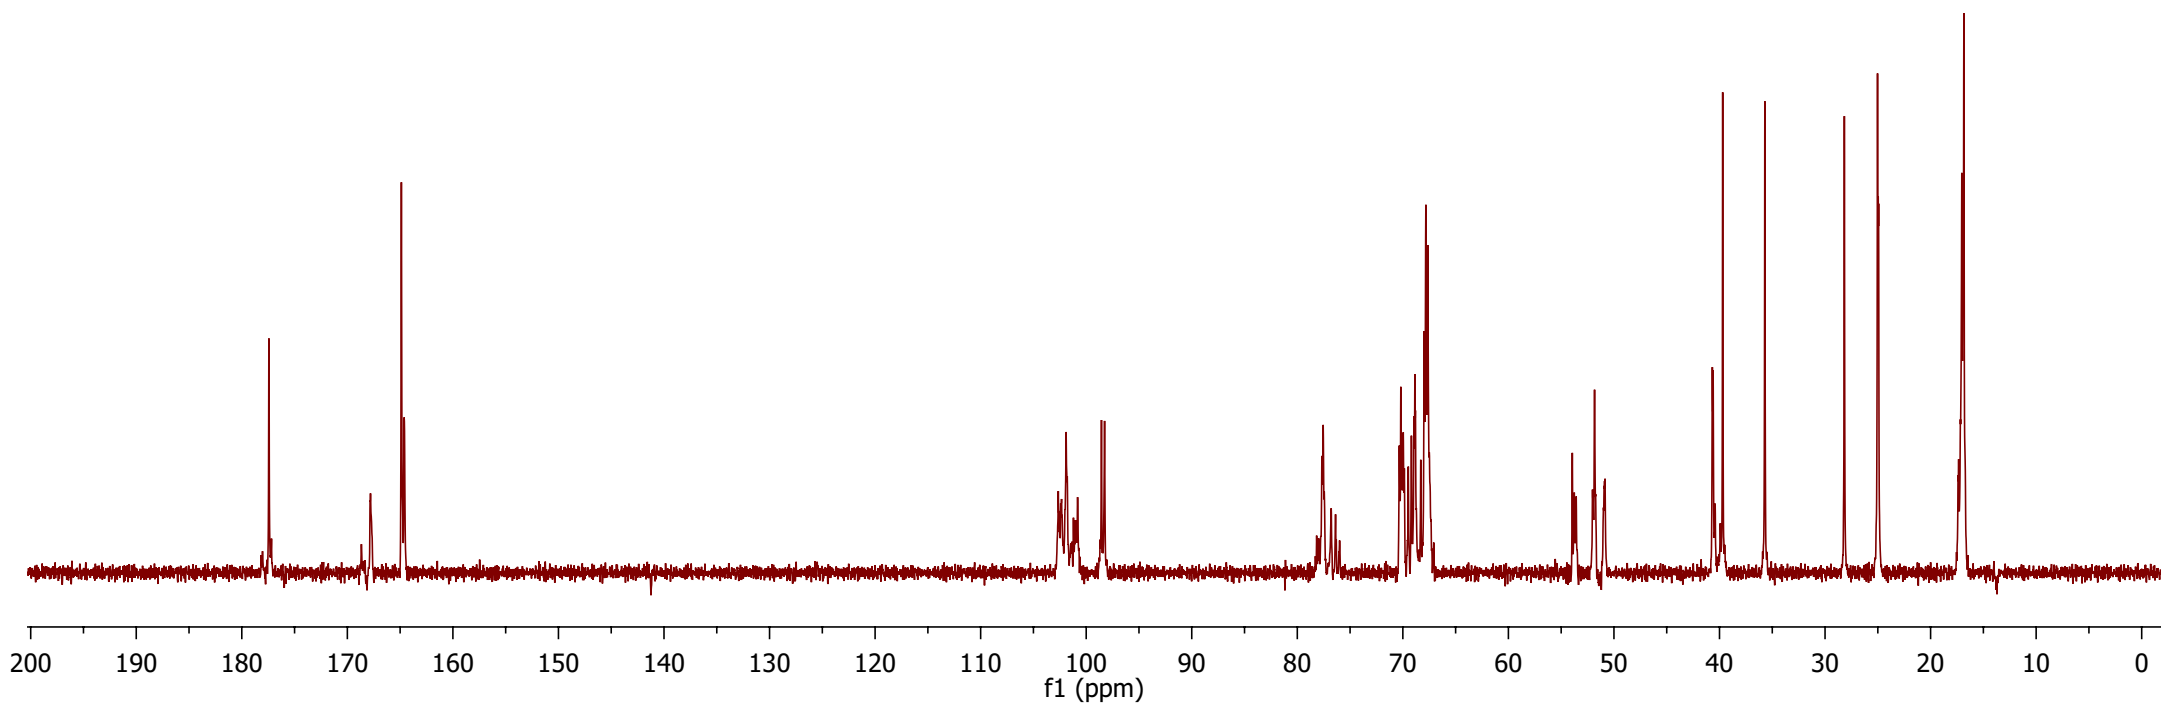

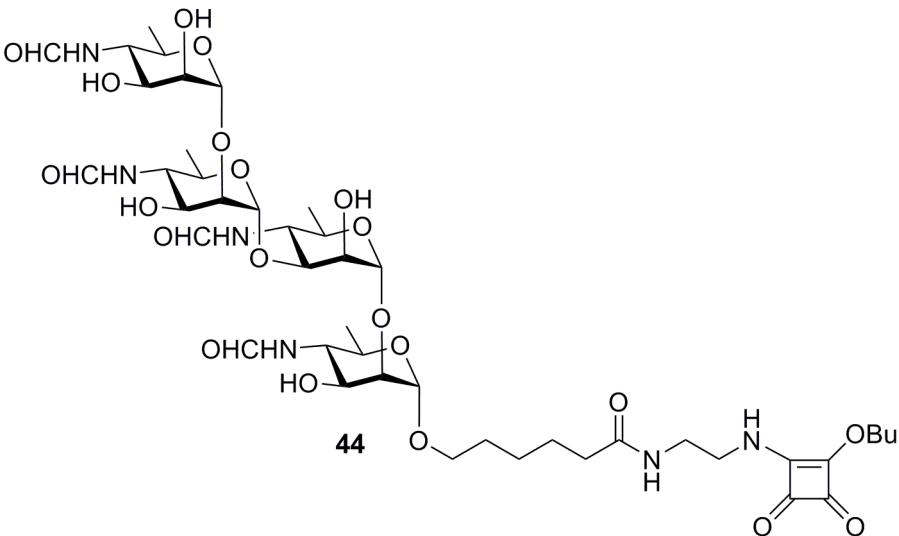

44

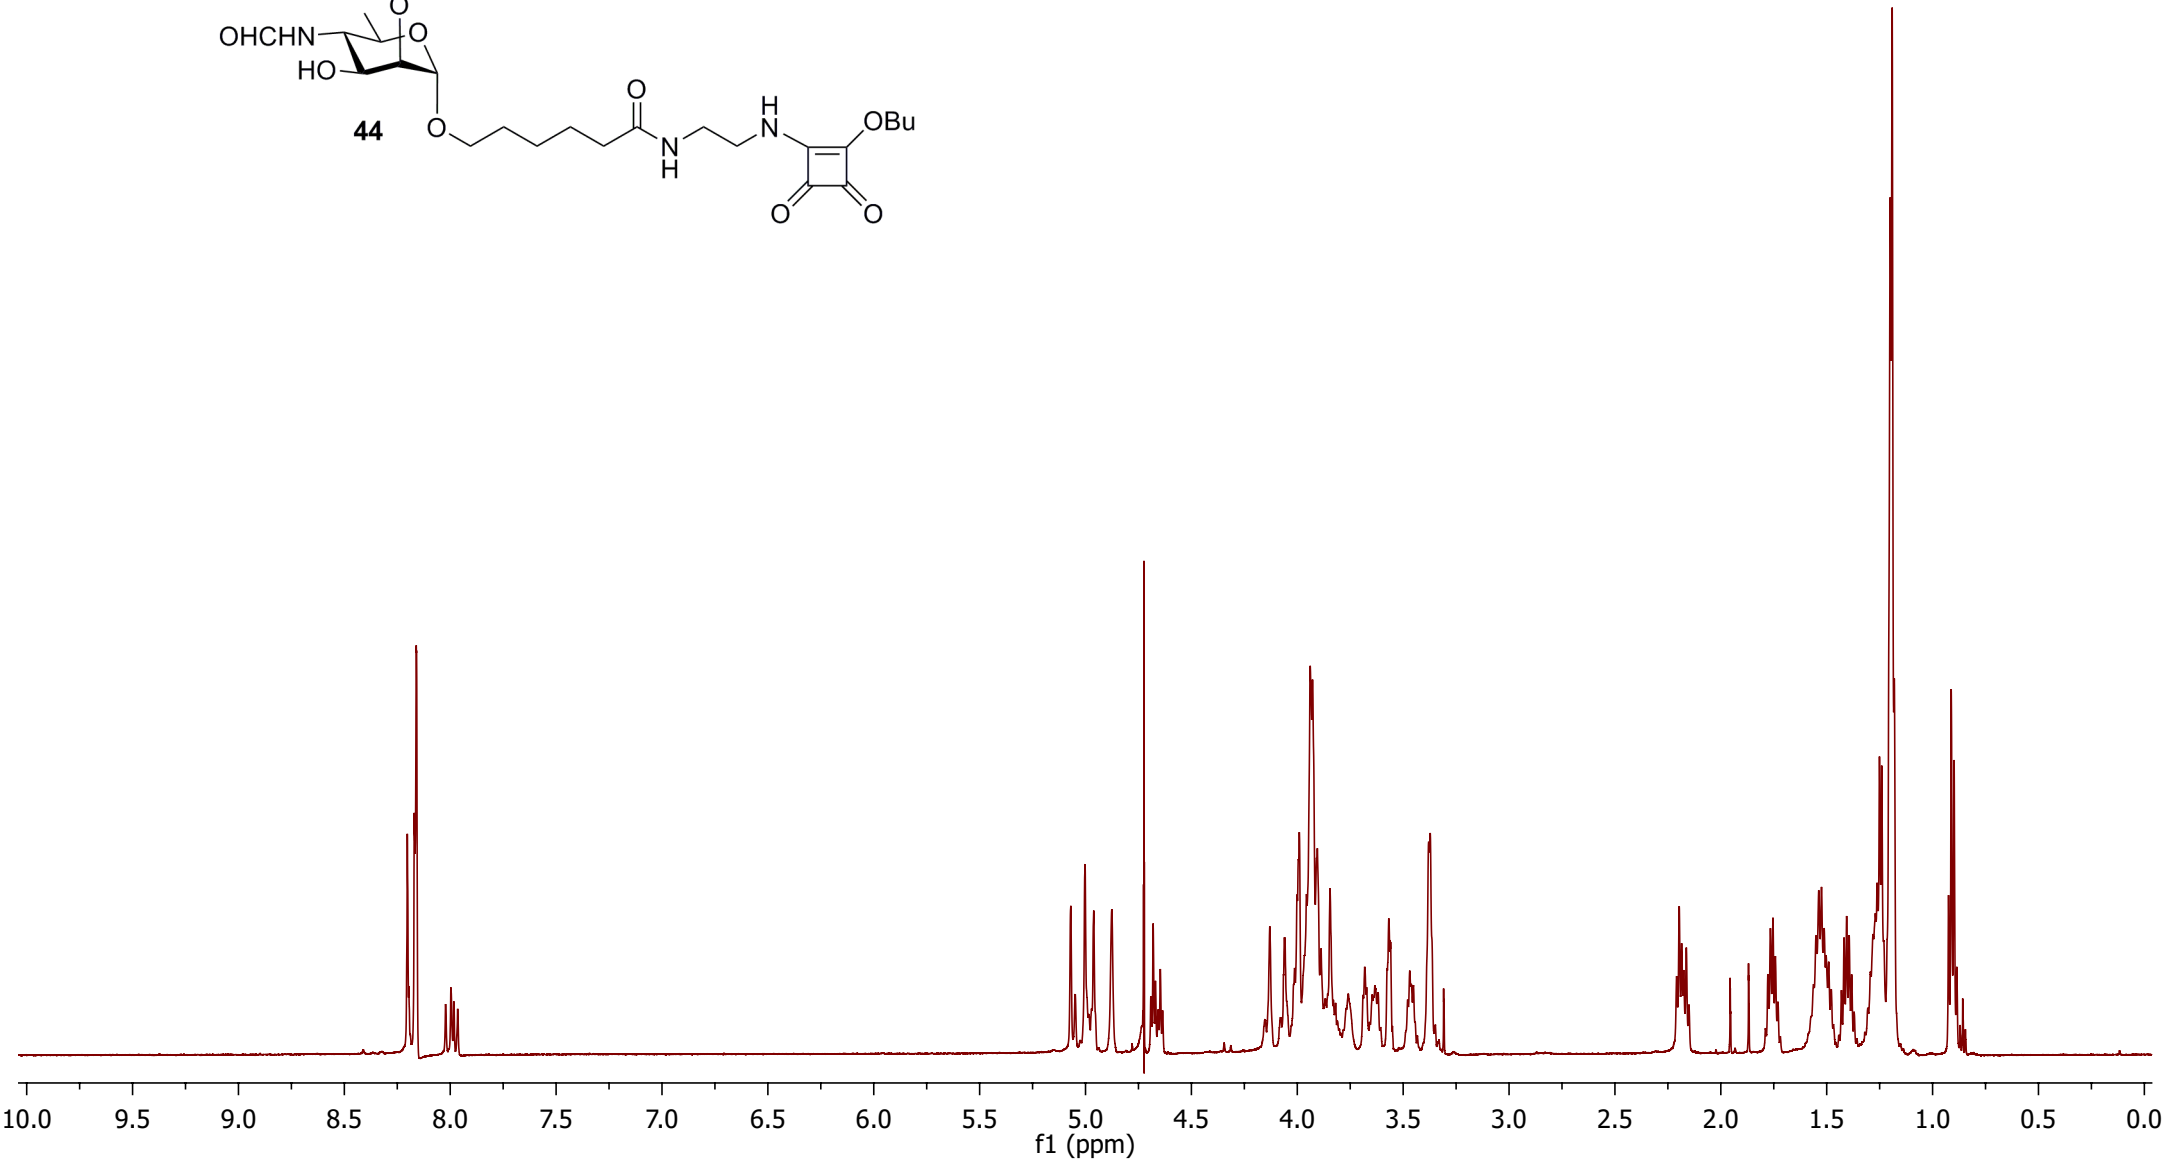

126 MHz, D<sub>2</sub>O

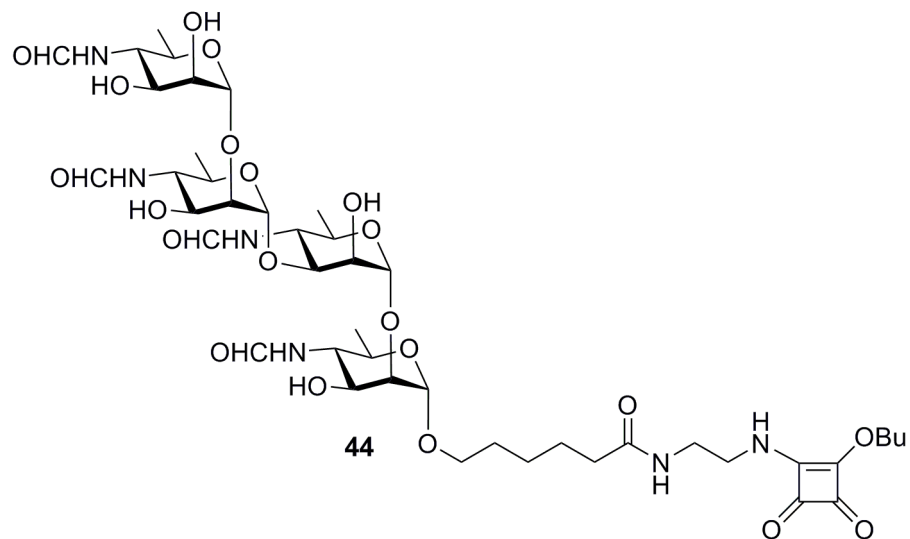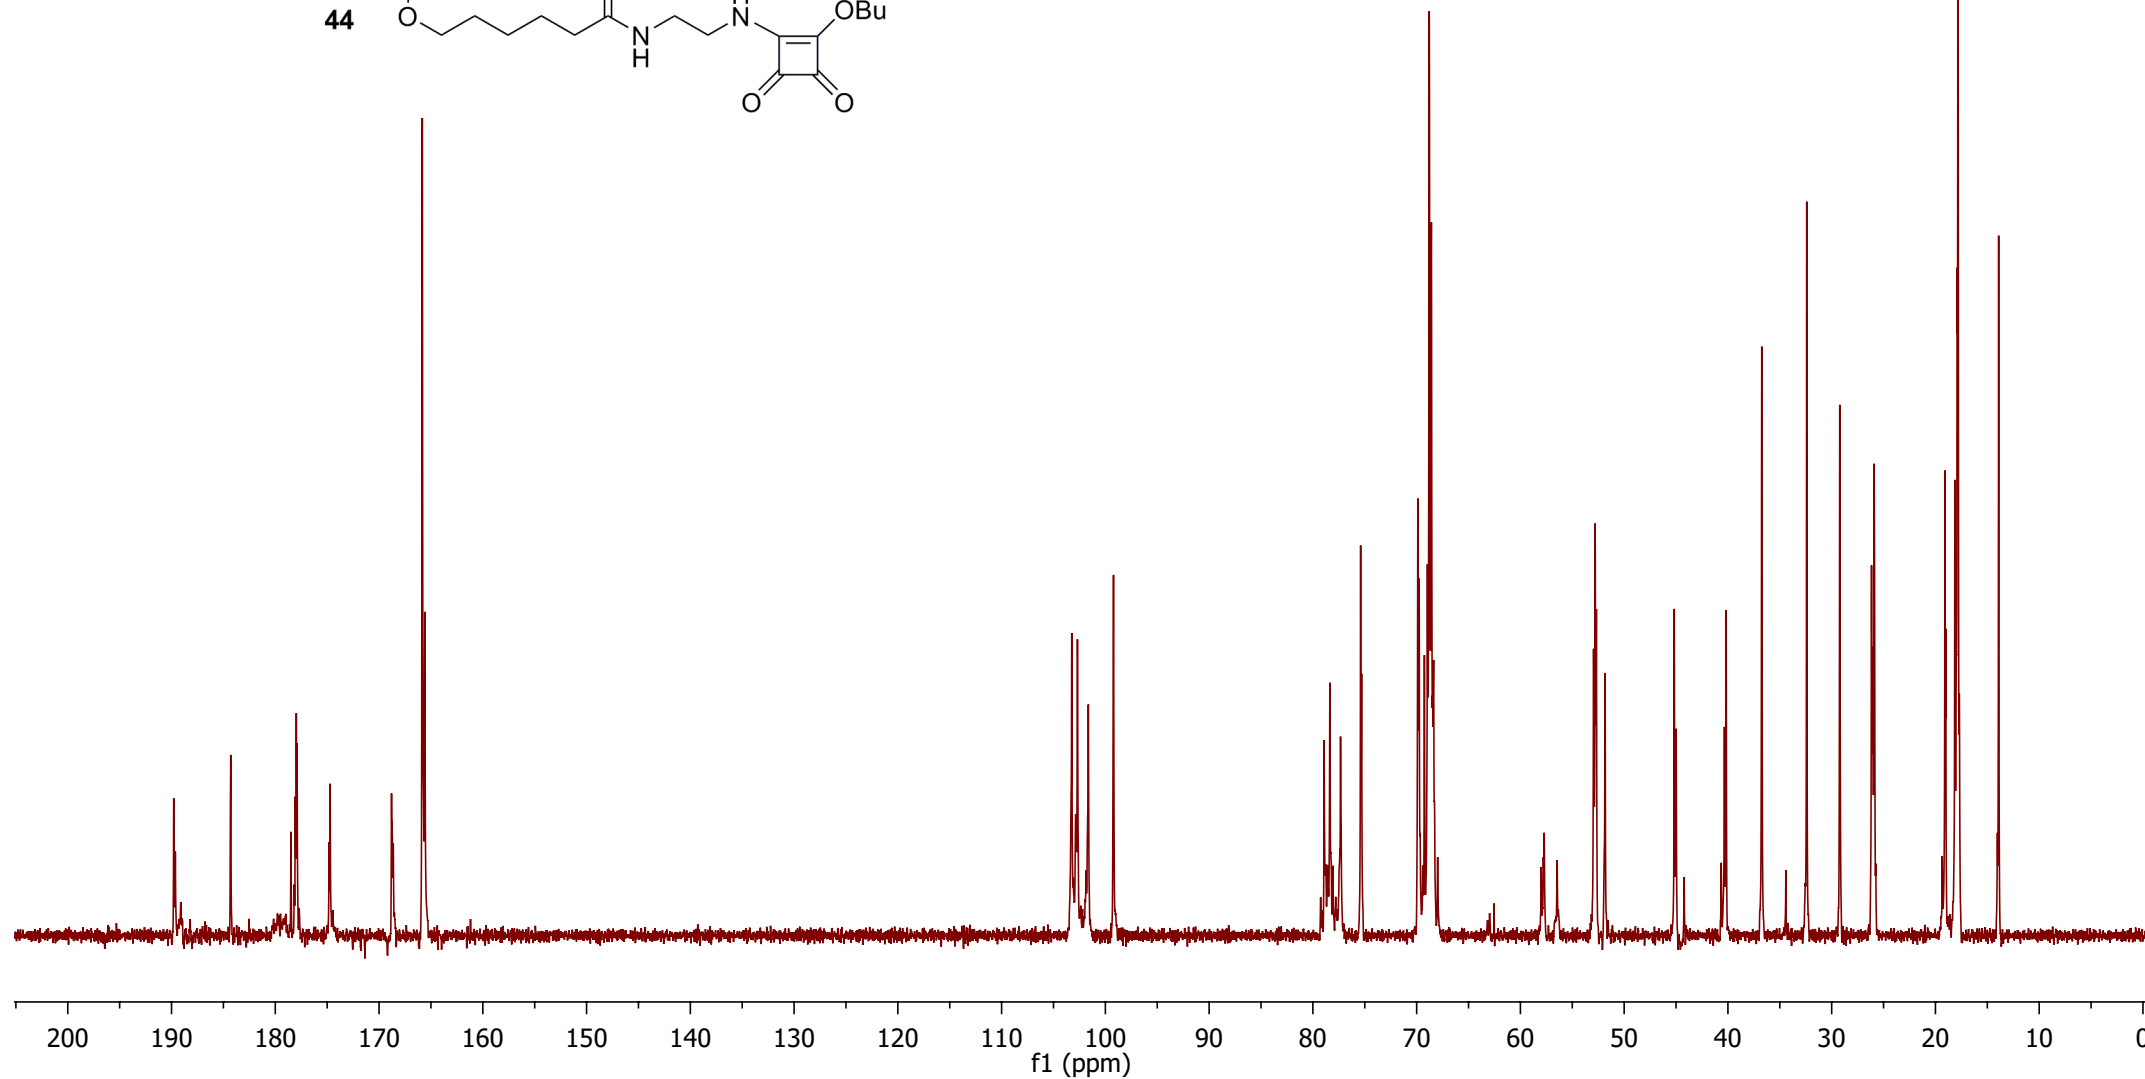

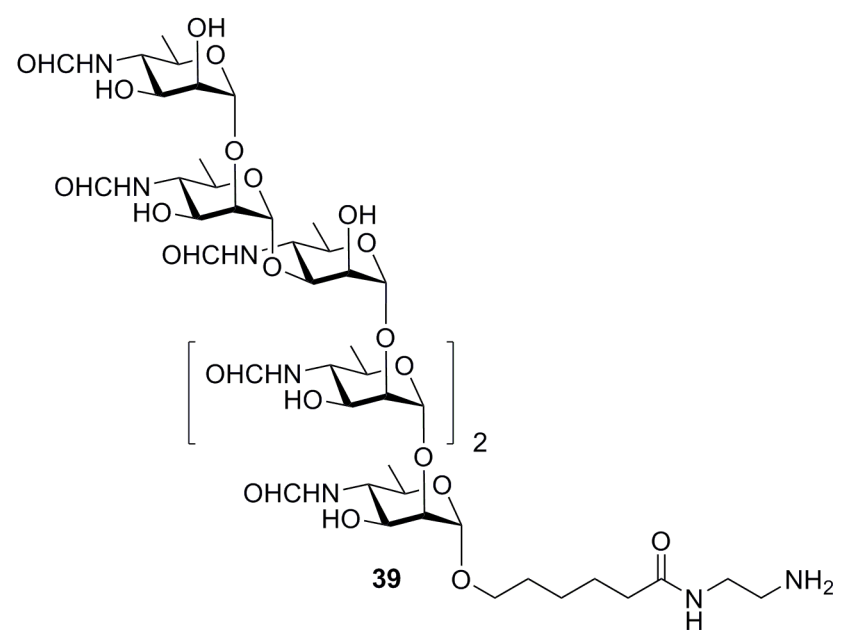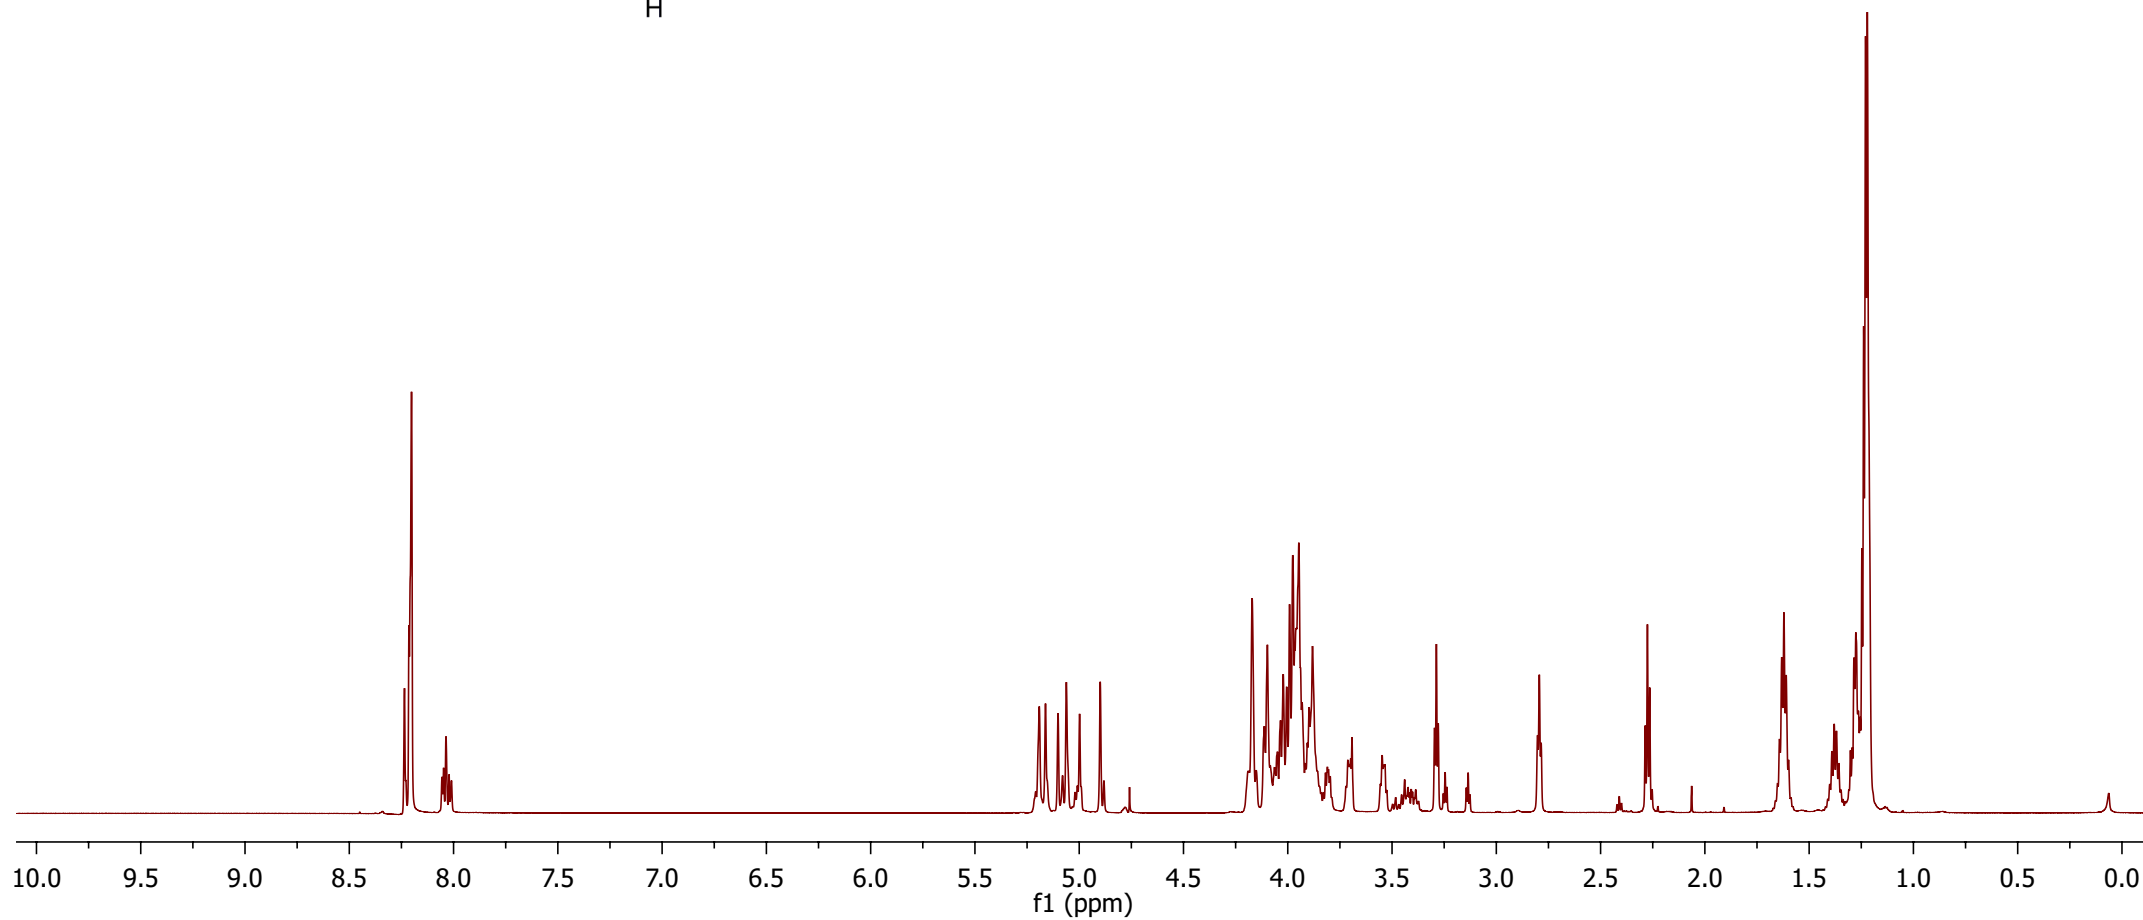

126 MHz, D<sub>2</sub>O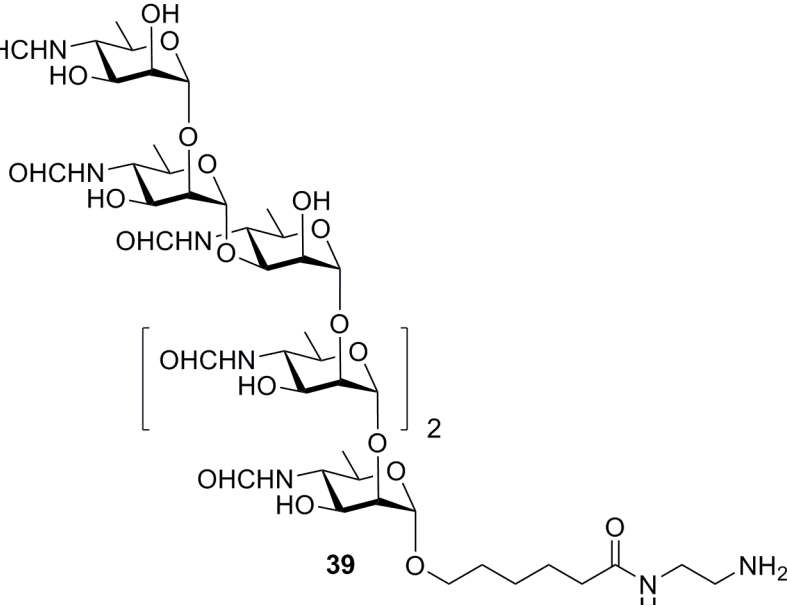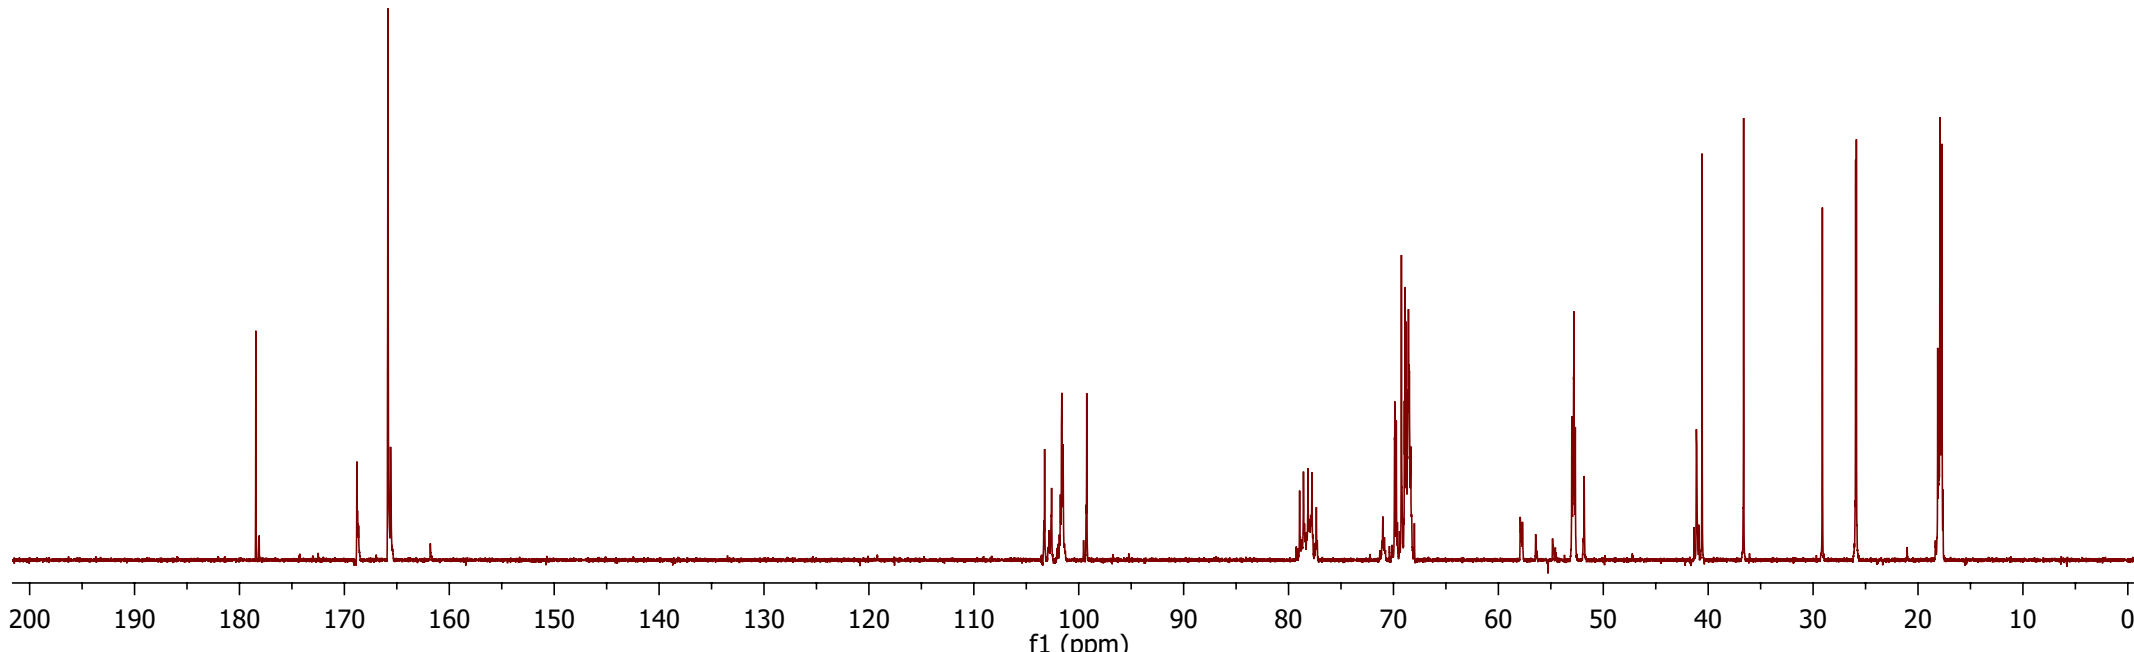



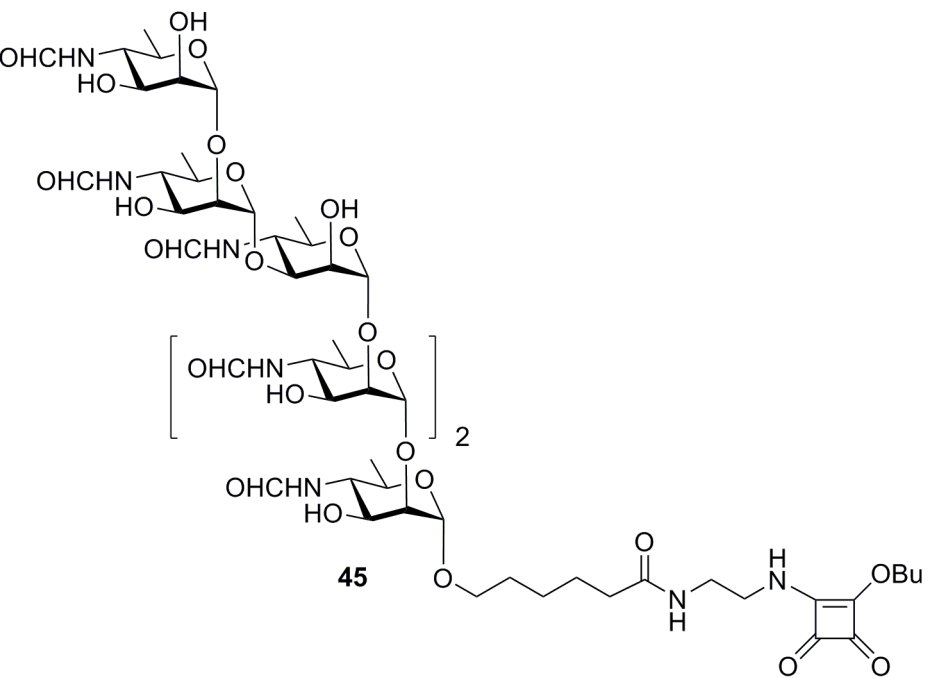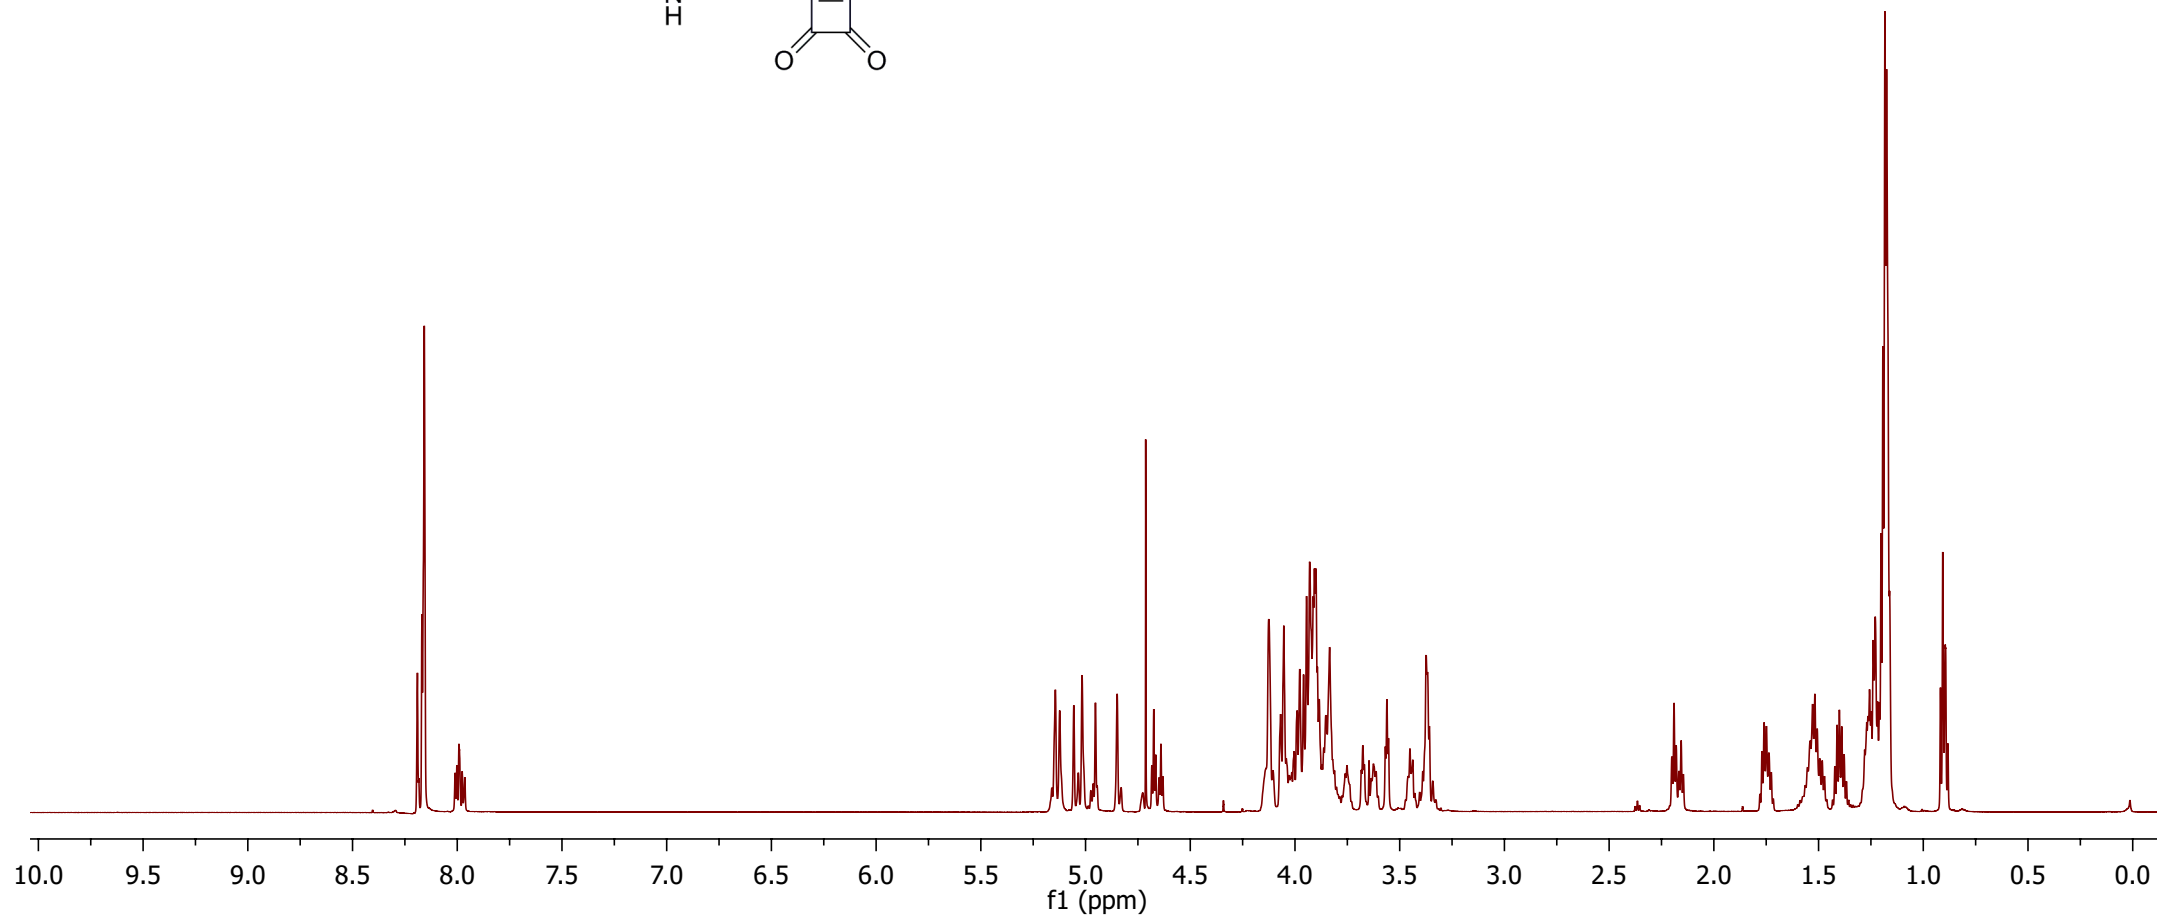

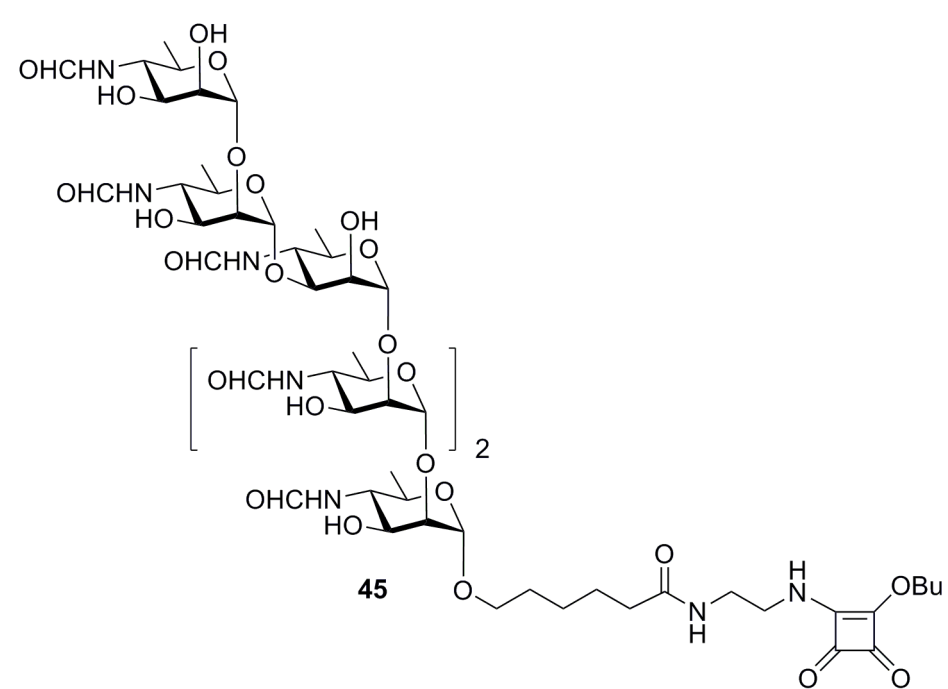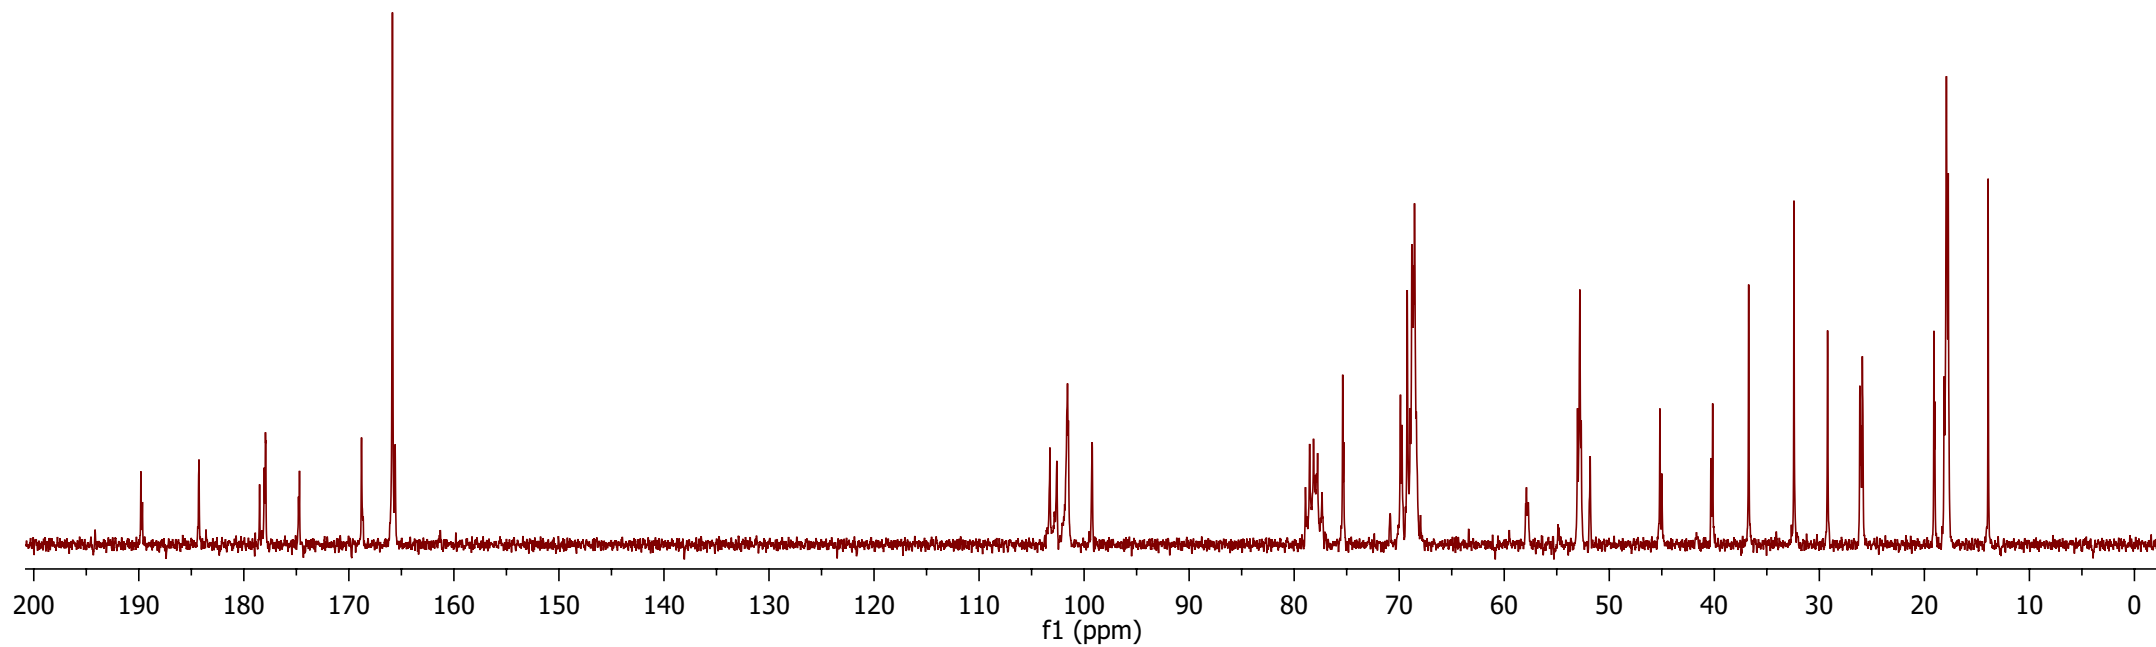

500 MHz, D<sub>2</sub>O

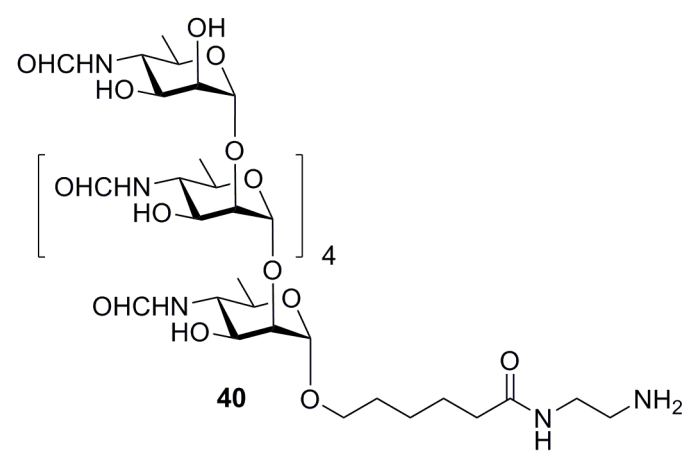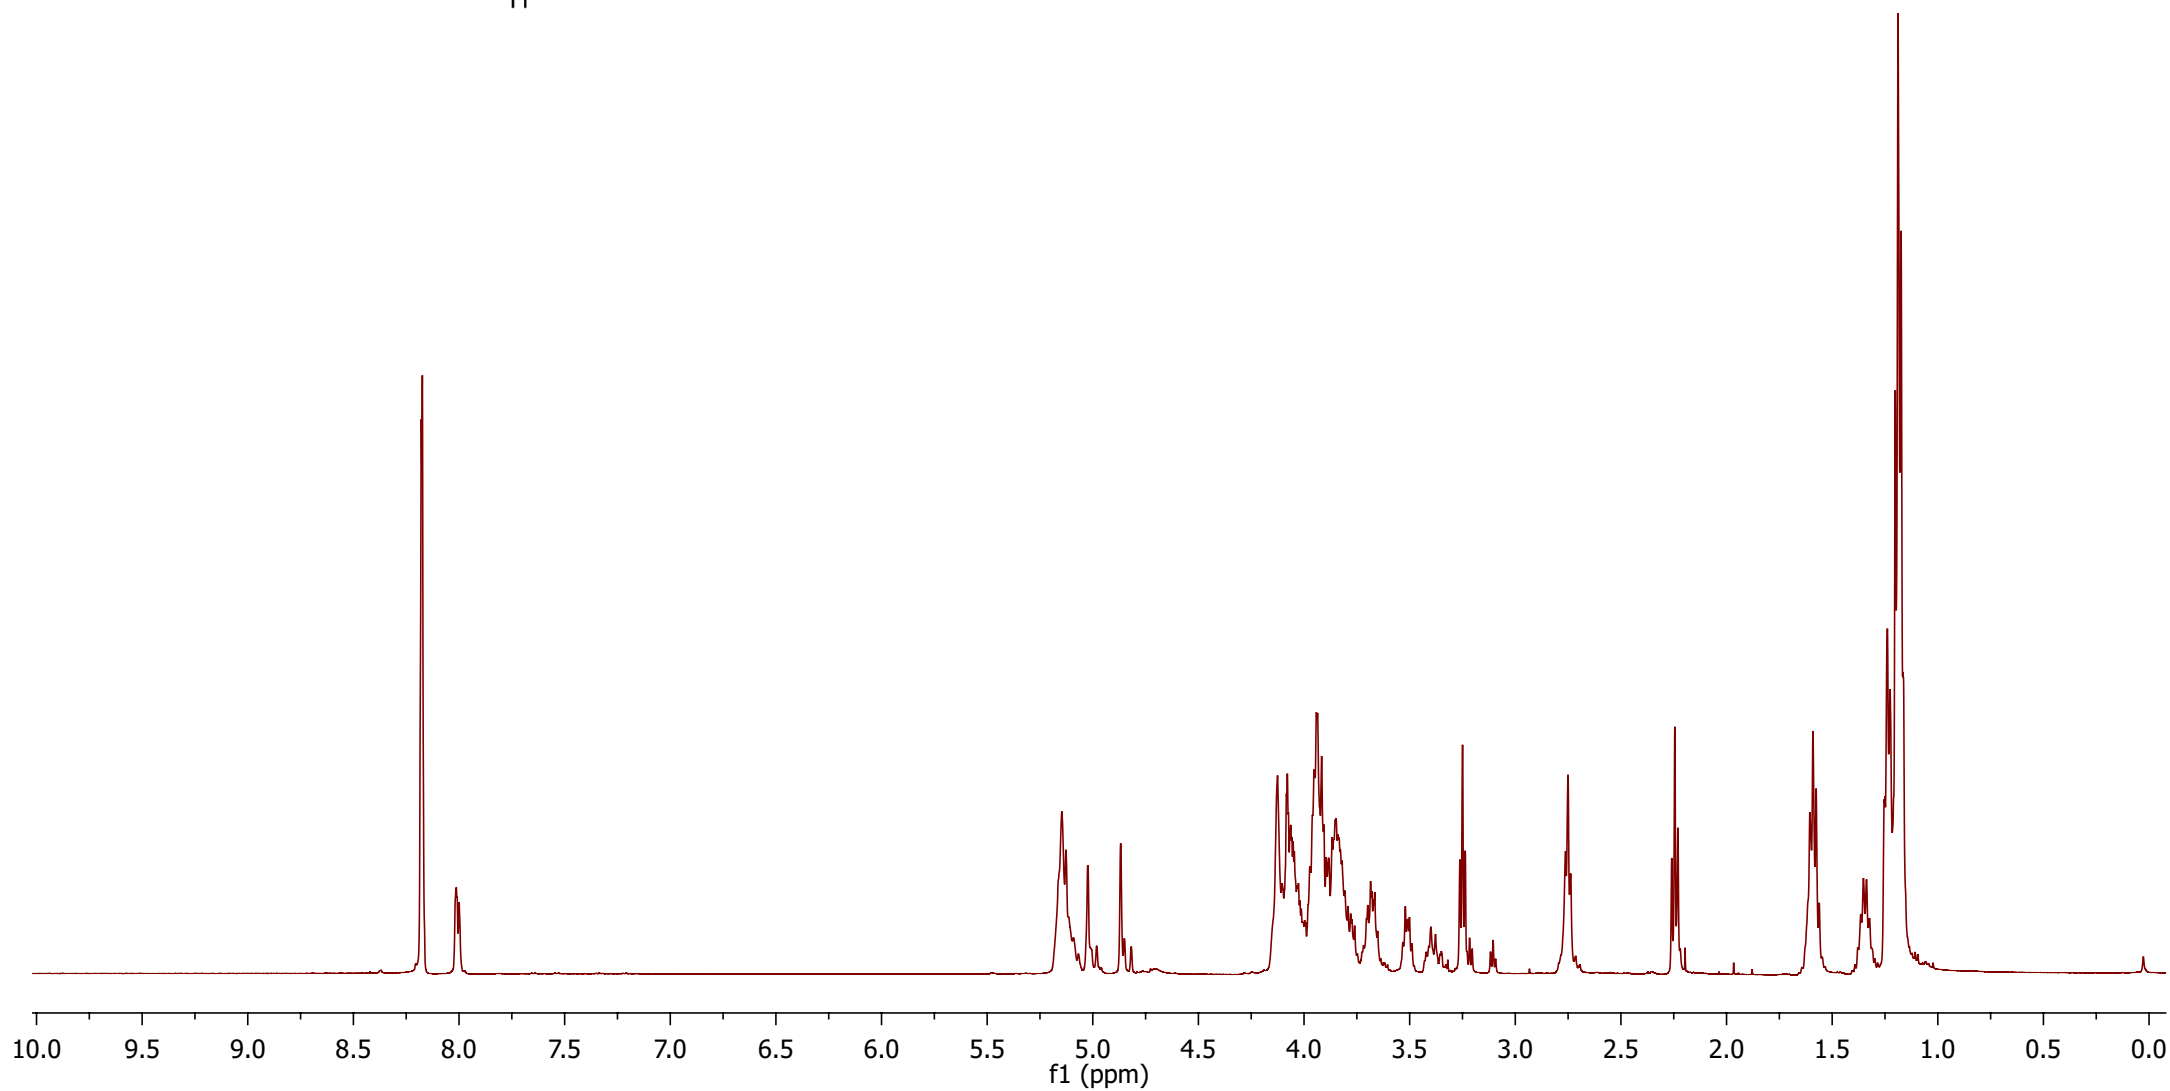

126 MHz, D<sub>2</sub>O

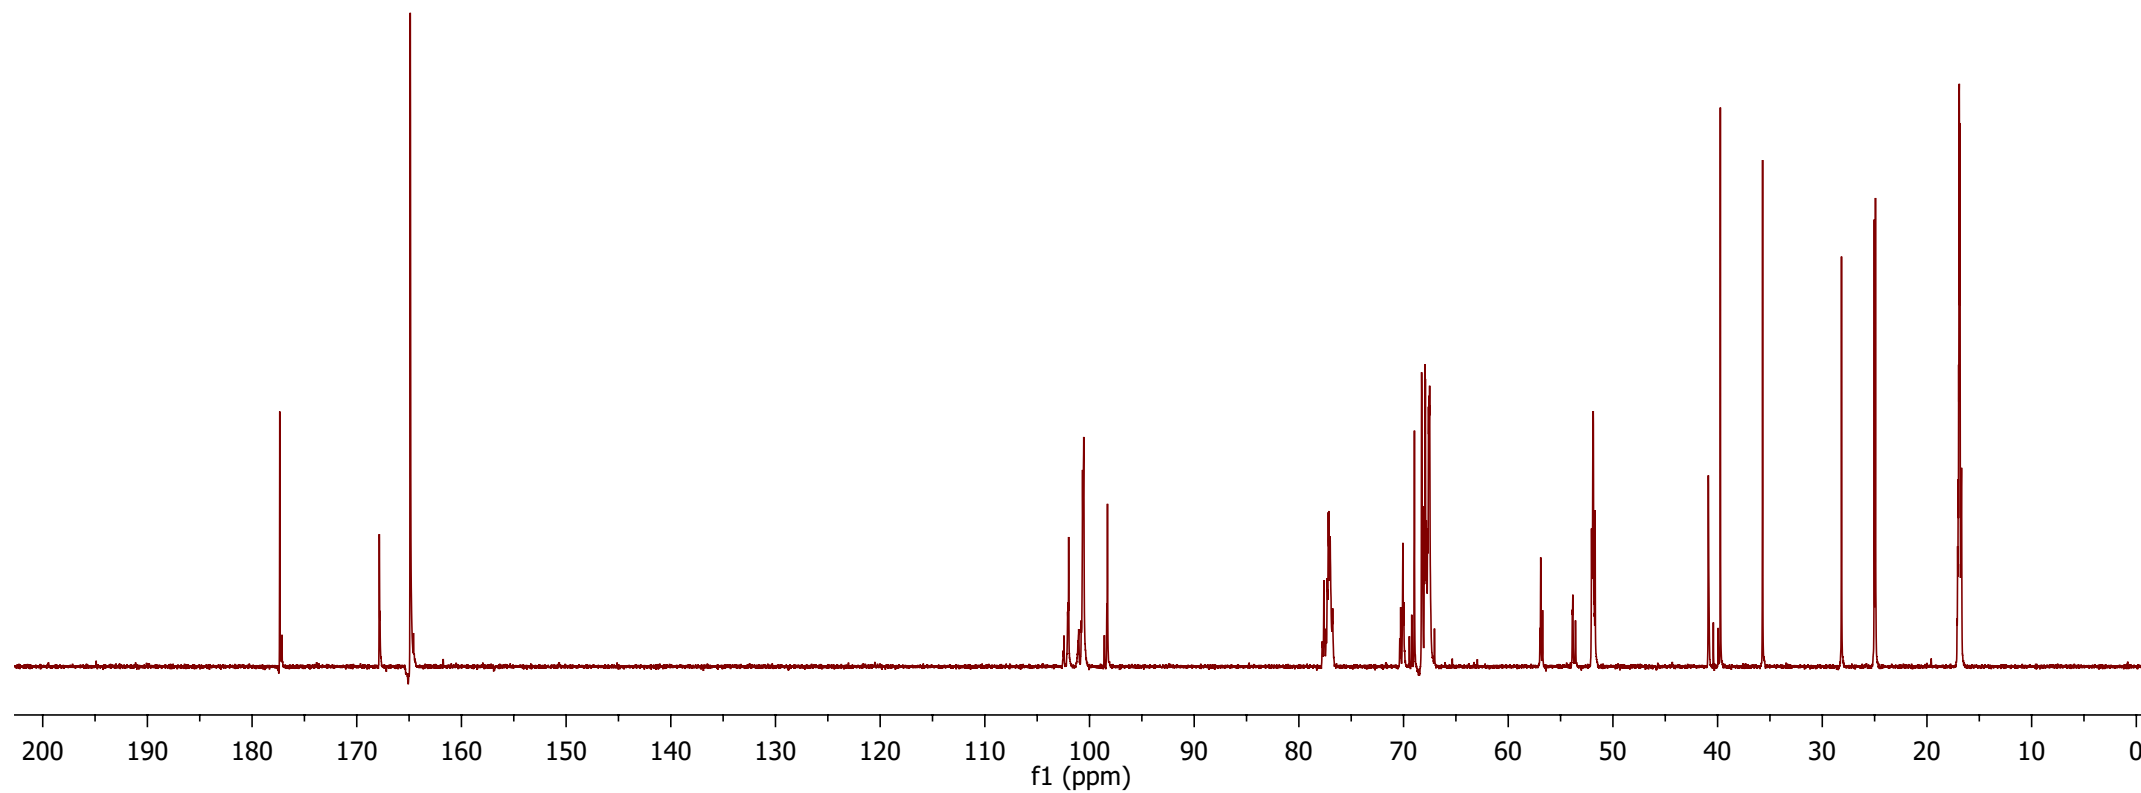

700 MHz, D<sub>2</sub>O

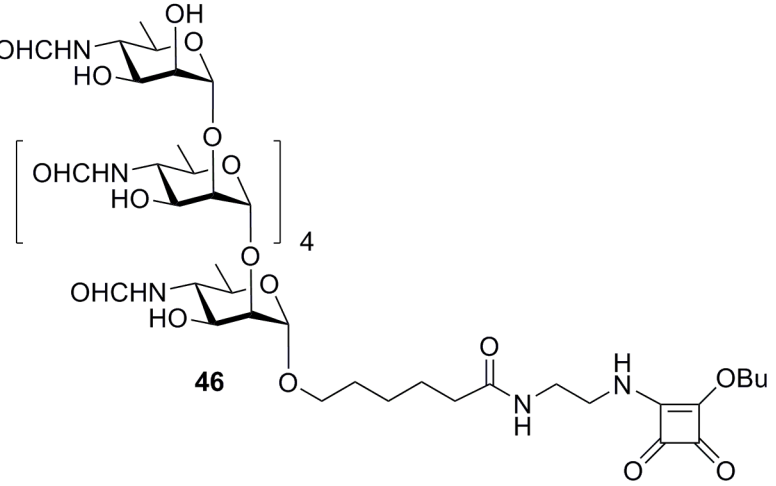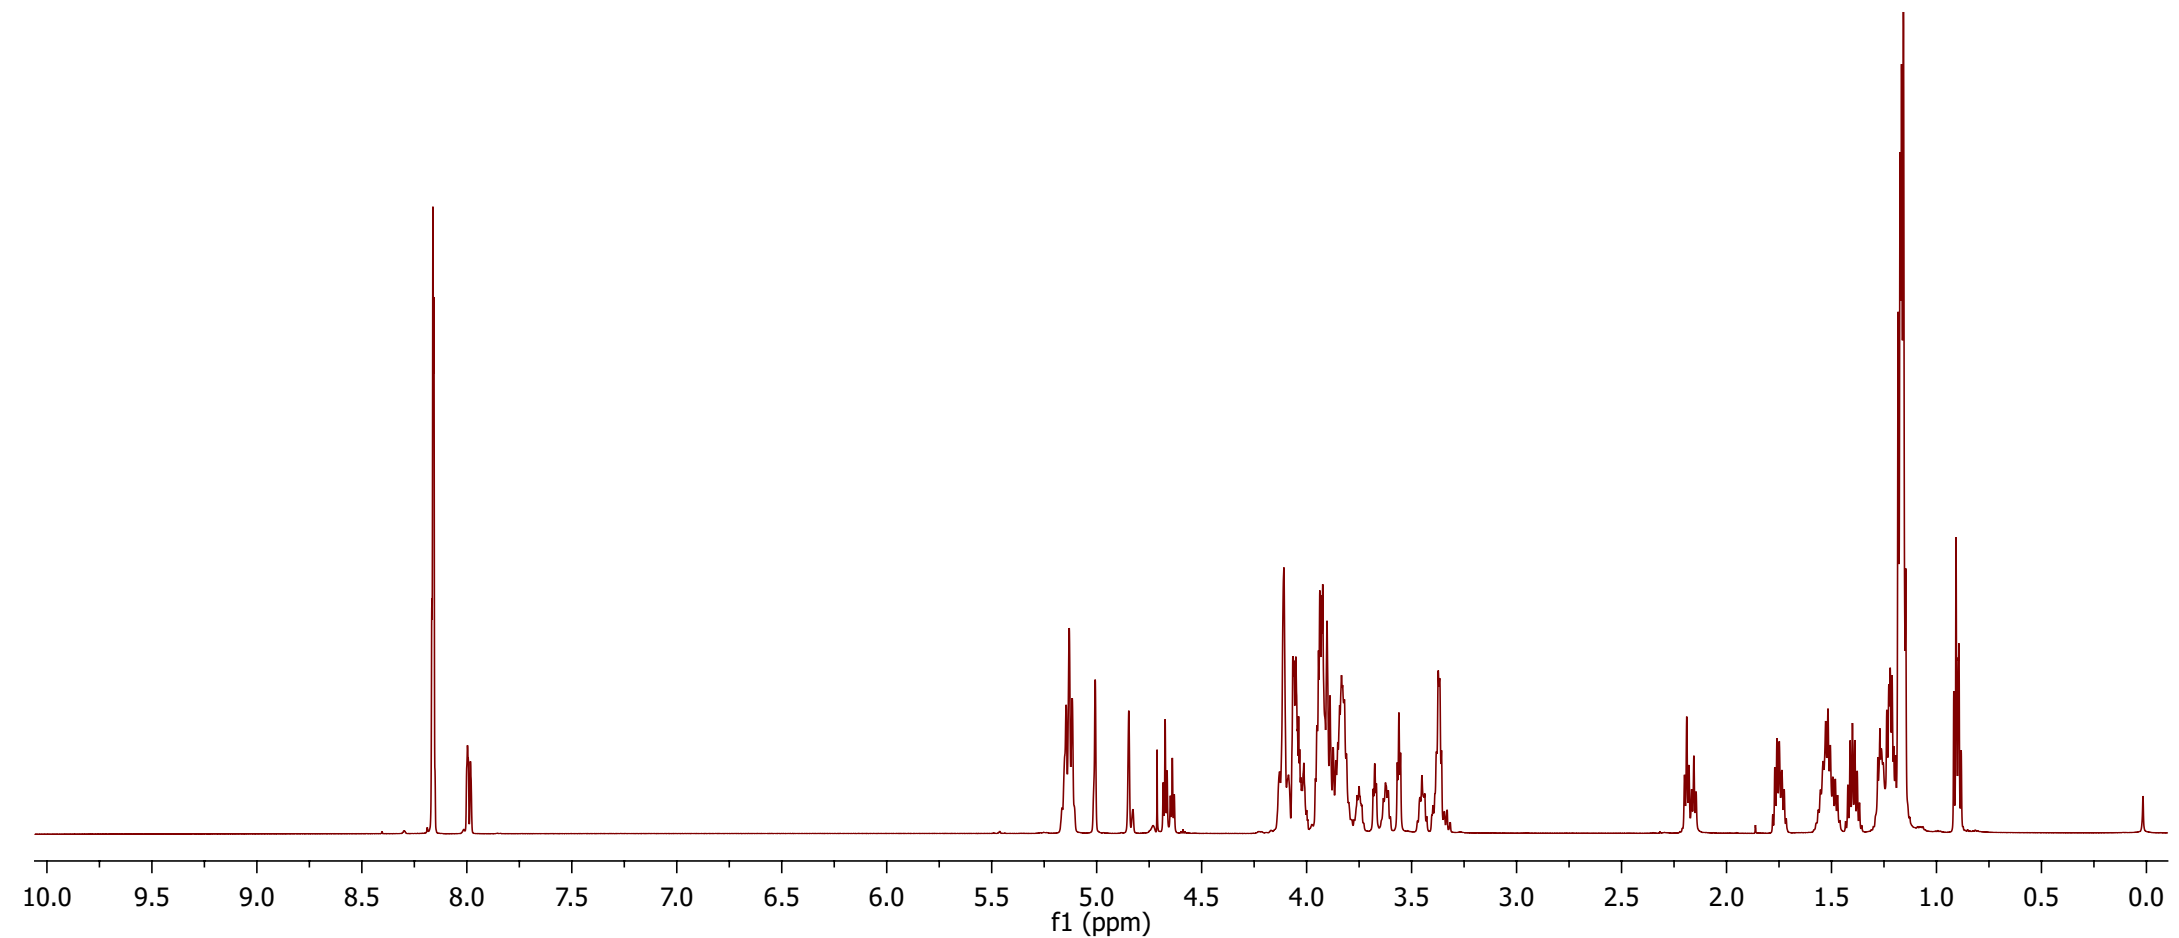

126 MHz, D<sub>2</sub>O

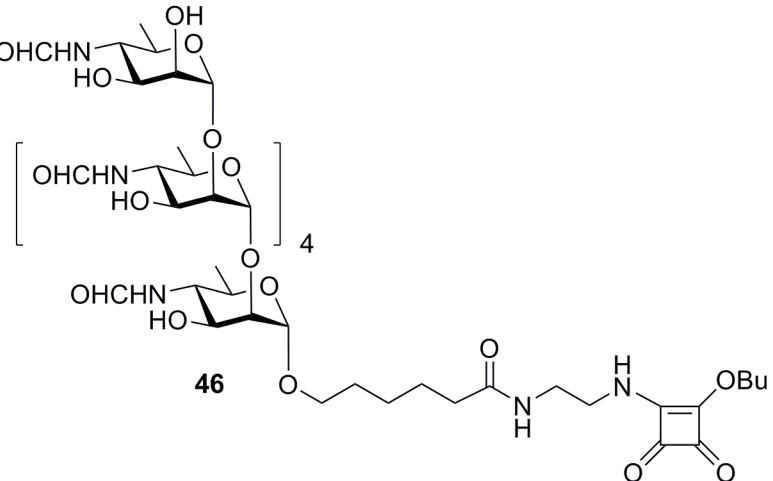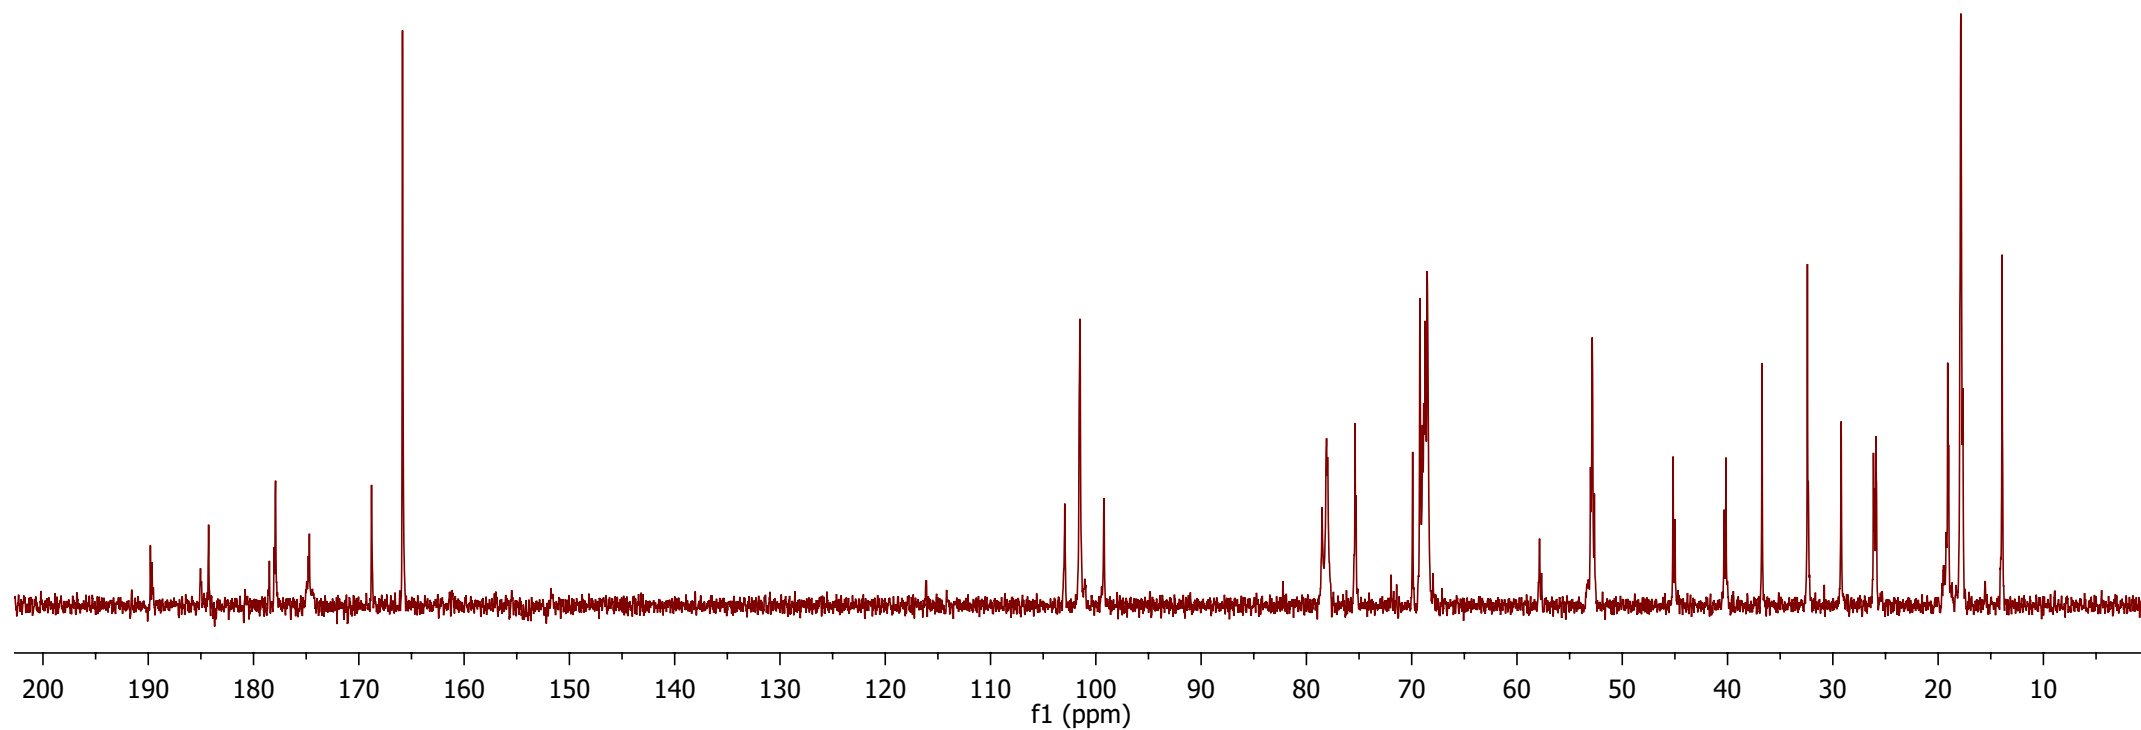

Supplement: Supplementary file 1 [file 3869761]
